# Supplementary material for: Comparative Epigenomics Reveals Host Diversity of the Trichinella Epigenomes and Their Effects on Differential Parasitism
Source: Front Cell Dev Biol. 2021 Jun 11;9:681839. doi: 10.3389/fcell.2021.681839 (PMC8226246; doi:10.3389/fcell.2021.681839)
Supplement: Supplementary file 2 [file Data_Sheet_1.XLSX]

## Sheet: 2708 SCOs
Supplementary Data S1 2708 single-copy orthologous genes of the twelve Trichinella species based on the protein sequence similarity.
Family ID	SCOs
	T1	T2	T3	T5	T6	T7	T8	T9	T12	T4	T10	T11
2131	EFV46375_T1	KRZ54397.1_T2	KRY47694.1_T3	KRX39303.1_T5	KRX82104.1_T6	KRX17279.1_T7	KRZ91010.1_T8	KRX53414.1_T9	KRY15550.1_T12	TP09667_T4	KRZ71698.1_T10	KRZ03314.1_T11
2133	EFV46499_T1	KRZ63386.1_T2	KRY61355.1_T3	KRX49243.1_T5	KRX83227.1_T6	KRX25988.1_T7	KRZ98090.1_T8	KRX68650.1_T9	KRY22393.1_T12	TP00242_T4	KRZ75524.1_T10	KRZ11981.1_T11
2134	EFV46519_T1	KRZ58258.1_T2	KRY46213.1_T3	KRX45648.1_T5	KRX79185.1_T6	KRX22940.1_T7	KRZ87879.1_T8	KRX58680.1_T9	KRY16363.1_T12	TP10831_T4	KRZ75299.1_T10	KRZ17145.1_T11
2135	EFV46546_T1	KRZ58079.1_T2	KRY49156.1_T3	KRX41056.1_T5	KRX73723.1_T6	KRX20585.1_T7	KRZ86405.1_T8	KRX63297.1_T9	KRY20502.1_T12	TP05939_T4	KRZ77275.1_T10	KRZ09929.1_T11
2136	EFV46550_T1	KRZ50578.1_T2	KRY57864.1_T3	KRX42068.1_T5	KRX78885.1_T6	KRX19251.1_T7	KRZ89421.1_T8	KRX59048.1_T9	KRY19048.1_T12	TP09008_T4	KRZ80915.1_T10	KRZ14271.1_T11
2137	EFV46553_T1	KRZ61508.1_T2	KRY55599.1_T3	KRX42219.1_T5	KRX76833.1_T6	KRX14927.1_T7	KRZ90708.1_T8	KRX63054.1_T9	KRY14327.1_T12	TP06489_T4	KRZ74102.1_T10	KRZ19413.1_T11
2147	EFV47315_T1	KRZ52339.1_T2	KRY48289.1_T3	KRX49254.1_T5	KRX73528.1_T6	KRX23958.1_T7	KRZ87860.1_T8	KRX62103.1_T9	KRY12113.1_T12	TP12201_T4	KRZ74532.1_T10	KRZ15725.1_T11
2150	EFV47407_T1	KRZ61639.1_T2	KRY57779.1_T3	KRX50011.1_T5	KRX79661.1_T6	KRX14705.1_T7	KRZ97094.1_T8	KRX67412.1_T9	KRY16032.1_T12	TP00614_T4	KRZ77353.1_T10	KRZ15306.1_T11
2152	EFV47466_T1	KRZ51651.1_T2	KRY60913.1_T3	KRX50791.1_T5	KRX69632.1_T6	KRX25550.1_T7	KRZ96343.1_T8	KRX68480.1_T9	KRY16280.1_T12	TP06542_T4	KRZ68389.1_T10	KRZ19447.1_T11
2156	EFV47742_T1	KRZ50292.1_T2	KRY45253.1_T3	KRX38820.1_T5	KRX71300.1_T6	KRX13775.1_T7	KRZ84150.1_T8	KRX65888.1_T9	KRY11347.1_T12	TP03049_T4	KRZ67331.1_T10	KRZ03156.1_T11
2160	EFV47983_T1	KRZ63508.1_T2	KRY61313.1_T3	KRX49583.1_T5	KRX80901.1_T6	KRX27596.1_T7	KRZ97988.1_T8	KRX60741.1_T9	KRY19904.1_T12	TP00320_T4	KRZ72691.1_T10	KRZ16374.1_T11
2163	EFV48277_T1	KRZ52620.1_T2	KRY48800.1_T3	KRX40237.1_T5	KRX72933.1_T6	KRX20484.1_T7	KRZ87297.1_T8	KRX60194.1_T9	KRY15182.1_T12	TP02884_T4	KRZ72400.1_T10	KRZ03826.1_T11
2167	EFV48484_T1	KRZ52474.1_T2	KRY52822.1_T3	KRX38592.1_T5	KRX78507.1_T6	KRX23519.1_T7	KRZ82938.1_T8	KRX52902.1_T9	KRY10917.1_T12	TP02316_T4	KRZ66532.1_T10	KRZ02424.1_T11
2169	EFV48644_T1	KRZ55861.1_T2	KRY52532.1_T3	KRX45342.1_T5	KRX75780.1_T6	KRX23693.1_T7	KRZ97105.1_T8	KRX65340.1_T9	KRY21219.1_T12	TP11551_T4	KRZ76767.1_T10	KRZ15119.1_T11
2171	EFV48785_T1	KRZ62283.1_T2	KRY60360.1_T3	KRX47174.1_T5	KRX81966.1_T6	KRX27206.1_T7	KRZ96578.1_T8	KRX62639.1_T9	KRY21294.1_T12	TP06625_T4	KRZ76266.1_T10	KRZ16195.1_T11
2173	EFV48889_T1	KRZ60551.1_T2	KRY57323.1_T3	KRX49465.1_T5	KRX83839.1_T6	KRX24638.1_T7	KRZ91820.1_T8	KRX63850.1_T9	KRY22157.1_T12	TP09636_T4	KRZ73450.1_T10	KRZ05352.1_T11
2176	EFV48977_T1	KRZ54242.1_T2	KRY50638.1_T3	KRX48051.1_T5	KRX82200.1_T6	KRX24765.1_T7	KRZ93101.1_T8	KRX65303.1_T9	KRY13620.1_T12	TP07132_T4	KRZ76228.1_T10	KRZ11598.1_T11
2182	EFV49184_T1	KRZ59973.1_T2	KRY59938.1_T3	KRX47067.1_T5	KRX73860.1_T6	KRX27477.1_T7	KRZ95102.1_T8	KRX68782.1_T9	KRY18600.1_T12	TP00386_T4	KRZ77700.1_T10	KRZ17237.1_T11
2183	EFV49231_T1	KRZ50768.1_T2	KRY47937.1_T3	KRX44691.1_T5	KRX84999.1_T6	KRX23063.1_T7	KRZ96052.1_T8	KRX68740.1_T9	KRY16570.1_T12	TP05169_T4	KRZ79474.1_T10	KRZ07708.1_T11
2184	EFV49236_T1	KRZ55351.1_T2	KRY52176.1_T3	KRX45030.1_T5	KRX80776.1_T6	KRX16490.1_T7	KRZ97144.1_T8	KRX58794.1_T9	KRY15090.1_T12	TP12134_T4	KRZ76015.1_T10	KRZ10146.1_T11
2186	EFV49267_T1	KRZ55195.1_T2	KRY51906.1_T3	KRX45085.1_T5	KRX81604.1_T6	KRX26682.1_T7	KRZ88441.1_T8	KRX56930.1_T9	KRY20711.1_T12	TP07477_T4	KRZ80488.1_T10	KRZ17628.1_T11
2187	EFV49290_T1	KRZ51687.1_T2	KRY48246.1_T3	KRX48083.1_T5	KRX72841.1_T6	KRX24901.1_T7	KRZ86529.1_T8	KRX65289.1_T9	KRY10763.1_T12	TP11347_T4	KRZ76180.1_T10	KRZ03785.1_T11
2188	EFV49293_T1	KRZ57290.1_T2	KRY59273.1_T3	KRX44601.1_T5	KRX78962.1_T6	KRX20934.1_T7	KRZ96729.1_T8	KRX62747.1_T9	KRY20458.1_T12	TP10171_T4	KRZ78454.1_T10	KRZ13787.1_T11
2191	EFV49351_T1	KRZ59549.1_T2	KRY57352.1_T3	KRX37271.1_T5	KRX70677.1_T6	KRX24720.1_T7	KRZ85980.1_T8	KRX54475.1_T9	KRY15565.1_T12	TP08658_T4	KRZ73878.1_T10	KRZ07894.1_T11
2196	EFV49483_T1	KRZ53069.1_T2	KRY54230.1_T3	KRX42288.1_T5	KRX74252.1_T6	KRX15534.1_T7	KRZ91179.1_T8	KRX61904.1_T9	KRY15864.1_T12	TP08190_T4	KRZ68067.1_T10	KRZ06422.1_T11
2197	EFV49556_T1	KRZ57387.1_T2	KRY53992.1_T3	KRX46414.1_T5	KRX84327.1_T6	KRX18051.1_T7	KRZ94414.1_T8	KRX61467.1_T9	KRY16653.1_T12	TP08167_T4	KRZ71813.1_T10	KRZ14119.1_T11
2198	EFV49588_T1	KRZ54705.1_T2	KRY51281.1_T3	KRX39254.1_T5	KRX76208.1_T6	KRX16723.1_T7	KRZ86583.1_T8	KRX57405.1_T9	KRY11494.1_T12	TP10107_T4	KRZ77819.1_T10	KRZ06903.1_T11
2199	EFV49625_T1	KRZ55868.1_T2	KRY52536.1_T3	KRX45327.1_T5	KRX75788.1_T6	KRX23774.1_T7	KRZ97260.1_T8	KRX65415.1_T9	KRY21247.1_T12	TP11554_T4	KRZ76781.1_T10	KRZ15201.1_T11
2202	EFV49667_T1	KRZ62749.1_T2	KRY59579.1_T3	KRX50486.1_T5	KRX83673.1_T6	KRX28195.1_T7	KRZ94916.1_T8	KRX66943.1_T9	KRY23403.1_T12	TP05830_T4	KRZ77615.1_T10	KRZ14354.1_T11
2203	EFV49711_T1	KRZ55703.1_T2	KRY46808.1_T3	KRX35974.1_T5	KRX76740.1_T6	KRX25726.1_T7	KRZ82595.1_T8	KRX51996.1_T9	KRY14418.1_T12	TP07785_T4	KRZ70567.1_T10	KRZ06518.1_T11
2205	EFV49762_T1	KRZ50960.1_T2	KRY48201.1_T3	KRX38988.1_T5	KRX84815.1_T6	KRX24050.1_T7	KRZ90284.1_T8	KRX62098.1_T9	KRY10801.1_T12	TP12235_T4	KRZ74944.1_T10	KRZ04291.1_T11
2206	EFV49836_T1	KRZ53082.1_T2	KRY54226.1_T3	KRX42282.1_T5	KRX74275.1_T6	KRX15532.1_T7	KRZ91176.1_T8	KRX61870.1_T9	KRY15871.1_T12	TP08195_T4	KRZ68044.1_T10	KRZ06424.1_T11
2209	EFV49978_T1	KRZ48516.1_T2	KRY44970.1_T3	KRX34199.1_T5	KRX77273.1_T6	KRX25660.1_T7	KRZ86484.1_T8	KRX56535.1_T9	KRY13006.1_T12	TP11304_T4	KRZ73765.1_T10	KRZ04077.1_T11
2211	EFV49983_T1	KRZ60205.1_T2	KRY60994.1_T3	KRX50854.1_T5	KRX82697.1_T6	KRX25583.1_T7	KRZ96200.1_T8	KRX68248.1_T9	KRY16302.1_T12	TP06440_T4	KRZ71944.1_T10	KRZ19245.1_T11
2213	EFV49994_T1	KRZ56552.1_T2	KRY53470.1_T3	KRX36515.1_T5	KRX72717.1_T6	KRX19714.1_T7	KRZ83121.1_T8	KRX60117.1_T9	KRY09929.1_T12	TP09984_T4	KRZ80372.1_T10	KRZ10781.1_T11
2215	EFV50045_T1	KRZ53384.1_T2	KRY56879.1_T3	KRX41104.1_T5	KRX72395.1_T6	KRX22047.1_T7	KRZ87857.1_T8	KRX54653.1_T9	KRY12317.1_T12	TP01791_T4	KRZ67728.1_T10	KRZ06833.1_T11
2216	EFV50049_T1	KRZ53363.1_T2	KRY56884.1_T3	KRX41087.1_T5	KRX72409.1_T6	KRX22126.1_T7	KRZ87827.1_T8	KRX54654.1_T9	KRY12344.1_T12	TP01785_T4	KRZ67726.1_T10	KRZ06826.1_T11
2217	EFV50051_T1	KRZ53372.1_T2	KRY56850.1_T3	KRX41107.1_T5	KRX72404.1_T6	KRX22120.1_T7	KRZ87838.1_T8	KRX54649.1_T9	KRY12319.1_T12	TP01782_T4	KRZ67738.1_T10	KRZ06848.1_T11
2218	EFV50052_T1	KRZ53386.1_T2	KRY56833.1_T3	KRX41105.1_T5	KRX72413.1_T6	KRX22110.1_T7	KRZ87822.1_T8	KRX54672.1_T9	KRY12357.1_T12	TP01783_T4	KRZ67717.1_T10	KRZ06844.1_T11
2219	EFV50054_T1	KRZ53369.1_T2	KRY56860.1_T3	KRX41081.1_T5	KRX72390.1_T6	KRX22043.1_T7	KRZ87829.1_T8	KRX54674.1_T9	KRY12331.1_T12	TP01780_T4	KRZ67721.1_T10	KRZ06843.1_T11
2220	EFV50055_T1	KRZ53385.1_T2	KRY56913.1_T3	KRX41111.1_T5	KRX72399.1_T6	KRX22155.1_T7	KRZ87851.1_T8	KRX54660.1_T9	KRY12349.1_T12	TP01778_T4	KRZ67737.1_T10	KRZ06846.1_T11
2221	EFV50057_T1	KRZ53393.1_T2	KRY56867.1_T3	KRX41101.1_T5	KRX72411.1_T6	KRX22108.1_T7	KRZ87861.1_T8	KRX54663.1_T9	KRY12354.1_T12	TP01776_T4	KRZ67730.1_T10	KRZ06828.1_T11
2222	EFV50058_T1	KRZ53364.1_T2	KRY56873.1_T3	KRX41118.1_T5	KRX72415.1_T6	KRX22040.1_T7	KRZ87850.1_T8	KRX54662.1_T9	KRY12334.1_T12	TP01775_T4	KRZ67718.1_T10	KRZ06819.1_T11
2223	EFV50059_T1	KRZ53383.1_T2	KRY56841.1_T3	KRX41082.1_T5	KRX72396.1_T6	KRX22084.1_T7	KRZ87843.1_T8	KRX54681.1_T9	KRY12315.1_T12	TP01774_T4	KRZ67736.1_T10	KRZ06812.1_T11
2224	EFV50061_T1	KRZ53358.1_T2	KRY56910.1_T3	KRX41114.1_T5	KRX72401.1_T6	KRX22118.1_T7	KRZ87852.1_T8	KRX54677.1_T9	KRY12309.1_T12	TP01771_T4	KRZ67733.1_T10	KRZ06840.1_T11
2225	EFV50066_T1	KRZ49063.1_T2	KRY45744.1_T3	KRX37040.1_T5	KRX70349.1_T6	KRX13526.1_T7	KRZ85888.1_T8	KRX53278.1_T9	KRY09954.1_T12	TP11309_T4	KRZ70902.1_T10	KRZ02716.1_T11
2226	EFV50069_T1	KRZ49059.1_T2	KRY45747.1_T3	KRX37029.1_T5	KRX70347.1_T6	KRX13531.1_T7	KRZ85874.1_T8	KRX53283.1_T9	KRY09969.1_T12	TP11310_T4	KRZ70872.1_T10	KRZ02727.1_T11
2227	EFV50072_T1	KRZ52088.1_T2	KRY51631.1_T3	KRX37034.1_T5	KRX72636.1_T6	KRX12957.1_T7	KRZ85879.1_T8	KRX59846.1_T9	KRY09967.1_T12	TP11311_T4	KRZ70886.1_T10	KRZ02728.1_T11
2229	EFV50121_T1	KRZ56195.1_T2	KRY52788.1_T3	KRX37621.1_T5	KRX78459.1_T6	KRX23597.1_T7	KRZ85084.1_T8	KRX56181.1_T9	KRY10859.1_T12	TP03145_T4	KRZ67008.1_T10	KRZ02872.1_T11
2233	EFV50154_T1	KRZ51817.1_T2	KRY45589.1_T3	KRX35808.1_T5	KRX77867.1_T6	KRX21447.1_T7	KRZ85865.1_T8	KRX61898.1_T9	KRY15637.1_T12	TP03230_T4	KRZ78545.1_T10	KRZ14091.1_T11
2234	EFV50156_T1	KRZ51823.1_T2	KRY45598.1_T3	KRX35804.1_T5	KRX77846.1_T6	KRX21415.1_T7	KRZ85855.1_T8	KRX61930.1_T9	KRY15661.1_T12	TP03219_T4	KRZ65886.1_T10	KRZ15220.1_T11
2235	EFV50168_T1	KRZ53681.1_T2	KRY45850.1_T3	KRX35696.1_T5	KRX72194.1_T6	KRX21449.1_T7	KRZ85877.1_T8	KRX61947.1_T9	KRY10300.1_T12	TP03224_T4	KRZ75239.1_T10	KRZ15169.1_T11
2236	EFV50185_T1	KRZ63031.1_T2	KRY48129.1_T3	KRX42395.1_T5	KRX72627.1_T6	KRX13285.1_T7	KRZ88520.1_T8	KRX54130.1_T9	KRY10076.1_T12	TP02714_T4	KRZ75226.1_T10	KRZ12687.1_T11
2237	EFV50189_T1	KRZ62957.1_T2	KRY48110.1_T3	KRX42422.1_T5	KRX72645.1_T6	KRX13271.1_T7	KRZ88487.1_T8	KRX54153.1_T9	KRY10053.1_T12	TP02722_T4	KRZ75234.1_T10	KRZ02301.1_T11
2239	EFV50193_T1	KRZ63001.1_T2	KRY48113.1_T3	KRX42428.1_T5	KRX72640.1_T6	KRX15695.1_T7	KRZ88511.1_T8	KRX54147.1_T9	KRY10073.1_T12	TP02725_T4	KRZ75146.1_T10	KRZ02285.1_T11
2240	EFV50215_T1	KRZ48876.1_T2	KRY46664.1_T3	KRX40864.1_T5	KRX75009.1_T6	KRX15680.1_T7	KRZ85724.1_T8	KRX63755.1_T9	KRY09305.1_T12	TP11445_T4	KRZ75217.1_T10	KRZ05960.1_T11
2241	EFV50216_T1	KRZ48874.1_T2	KRY46662.1_T3	KRX40841.1_T5	KRX75019.1_T6	KRX15691.1_T7	KRZ85720.1_T8	KRX63805.1_T9	KRY09308.1_T12	TP11444_T4	KRZ75200.1_T10	KRZ05930.1_T11
2242	EFV50217_T1	KRZ48879.1_T2	KRY46655.1_T3	KRX40866.1_T5	KRX75012.1_T6	KRX15662.1_T7	KRZ85707.1_T8	KRX63800.1_T9	KRY09310.1_T12	TP11442_T4	KRZ75207.1_T10	KRZ05933.1_T11
2243	EFV50218_T1	KRZ48877.1_T2	KRY46673.1_T3	KRX40847.1_T5	KRX75028.1_T6	KRX15689.1_T7	KRZ85683.1_T8	KRX63878.1_T9	KRY09318.1_T12	TP11441_T4	KRZ75158.1_T10	KRZ05942.1_T11
2244	EFV50233_T1	KRZ53456.1_T2	KRY49223.1_T3	KRX42056.1_T5	KRX80592.1_T6	KRX17044.1_T7	KRZ84806.1_T8	KRX65336.1_T9	KRY16141.1_T12	TP02607_T4	KRZ76783.1_T10	KRZ04272.1_T11
2245	EFV50234_T1	KRZ53441.1_T2	KRY49231.1_T3	KRX42037.1_T5	KRX80634.1_T6	KRX17052.1_T7	KRZ84785.1_T8	KRX65451.1_T9	KRY16130.1_T12	TP02606_T4	KRZ76780.1_T10	KRZ04258.1_T11
2246	EFV50235_T1	KRZ53443.1_T2	KRY49238.1_T3	KRX42040.1_T5	KRX80583.1_T6	KRX17023.1_T7	KRZ84789.1_T8	KRX65470.1_T9	KRY16133.1_T12	TP02605_T4	KRZ76808.1_T10	KRZ04266.1_T11
2247	EFV50238_T1	KRZ53446.1_T2	KRY49241.1_T3	KRX42043.1_T5	KRX80641.1_T6	KRX17019.1_T7	KRZ84787.1_T8	KRX65434.1_T9	KRY10487.1_T12	TP02603_T4	KRZ76818.1_T10	KRZ04265.1_T11
2248	EFV50241_T1	KRZ53436.1_T2	KRY49229.1_T3	KRX42031.1_T5	KRX80633.1_T6	KRX17025.1_T7	KRZ84791.1_T8	KRX65430.1_T9	KRY10494.1_T12	TP02599_T4	KRZ76803.1_T10	KRZ04261.1_T11
2249	EFV50242_T1	KRZ53461.1_T2	KRY49232.1_T3	KRX42027.1_T5	KRX80603.1_T6	KRX17033.1_T7	KRZ84802.1_T8	KRX65383.1_T9	KRY10499.1_T12	TP02596_T4	KRZ76739.1_T10	KRZ04271.1_T11
2250	EFV50243_T1	KRZ53438.1_T2	KRY49216.1_T3	KRX42051.1_T5	KRX80607.1_T6	KRX17017.1_T7	KRZ84805.1_T8	KRX65438.1_T9	KRY10497.1_T12	TP02595_T4	KRZ76785.1_T10	KRZ04268.1_T11
2251	EFV50244_T1	KRZ53442.1_T2	KRY49244.1_T3	KRX42034.1_T5	KRX80588.1_T6	KRX17026.1_T7	KRZ84793.1_T8	KRX65402.1_T9	KRY10501.1_T12	TP02594_T4	KRZ76770.1_T10	KRZ04273.1_T11
2252	EFV50253_T1	KRZ54363.1_T2	KRY51098.1_T3	KRX46287.1_T5	KRX83741.1_T6	KRX25266.1_T7	KRZ91461.1_T8	KRX55870.1_T9	KRY19388.1_T12	TP01103_T4	KRZ75058.1_T10	KRZ15070.1_T11
2253	EFV50254_T1	KRZ54390.1_T2	KRY51094.1_T3	KRX46324.1_T5	KRX83680.1_T6	KRX25160.1_T7	KRZ91441.1_T8	KRX55859.1_T9	KRY19396.1_T12	TP01101_T4	KRZ75130.1_T10	KRZ15005.1_T11
2254	EFV50257_T1	KRZ54364.1_T2	KRY51096.1_T3	KRX46315.1_T5	KRX83723.1_T6	KRX25189.1_T7	KRZ91401.1_T8	KRX55869.1_T9	KRY19383.1_T12	TP01097_T4	KRZ75095.1_T10	KRZ15036.1_T11
2255	EFV50258_T1	KRZ54361.1_T2	KRY51064.1_T3	KRX46339.1_T5	KRX81486.1_T6	KRX25159.1_T7	KRZ91472.1_T8	KRX55882.1_T9	KRY19348.1_T12	TP01095_T4	KRZ75105.1_T10	KRZ15067.1_T11
2256	EFV50267_T1	KRZ54389.1_T2	KRY51085.1_T3	KRX46308.1_T5	KRX81485.1_T6	KRX25228.1_T7	KRZ91436.1_T8	KRX55868.1_T9	KRY19352.1_T12	TP01087_T4	KRZ75126.1_T10	KRZ14989.1_T11
2257	EFV50268_T1	KRZ54386.1_T2	KRY51091.1_T3	KRX46323.1_T5	KRX81562.1_T6	KRX25210.1_T7	KRZ91445.1_T8	KRX55867.1_T9	KRY19376.1_T12	TP01086_T4	KRZ75100.1_T10	KRZ14971.1_T11
2258	EFV50271_T1	KRZ54378.1_T2	KRY51088.1_T3	KRX46311.1_T5	KRX81564.1_T6	KRX25270.1_T7	KRZ91478.1_T8	KRX55880.1_T9	KRY19354.1_T12	TP01082_T4	KRZ75136.1_T10	KRZ15034.1_T11
2259	EFV50275_T1	KRZ49780.1_T2	KRY54333.1_T3	KRX36991.1_T5	KRX80593.1_T6	KRX25169.1_T7	KRZ83250.1_T8	KRX52726.1_T9	KRY09825.1_T12	TP03830_T4	KRZ74302.1_T10	KRZ09784.1_T11
2261	EFV50281_T1	KRZ49778.1_T2	KRY54353.1_T3	KRX36998.1_T5	KRX80615.1_T6	KRX25182.1_T7	KRZ83253.1_T8	KRX52721.1_T9	KRY09807.1_T12	TP03836_T4	KRZ74298.1_T10	KRZ09723.1_T11
2262	EFV50282_T1	KRZ49773.1_T2	KRY54329.1_T3	KRX36989.1_T5	KRX80639.1_T6	KRX25202.1_T7	KRZ83255.1_T8	KRX52722.1_T9	KRY09820.1_T12	TP03838_T4	KRZ74292.1_T10	KRZ09728.1_T11
2263	EFV50283_T1	KRZ49772.1_T2	KRY54354.1_T3	KRX36994.1_T5	KRX80651.1_T6	KRX25162.1_T7	KRZ83257.1_T8	KRX52739.1_T9	KRY09814.1_T12	TP03839_T4	KRZ74294.1_T10	KRZ09732.1_T11
2264	EFV50290_T1	KRZ56366.1_T2	KRY53093.1_T3	KRX45887.1_T5	KRX73305.1_T6	KRX28328.1_T7	KRZ91484.1_T8	KRX66963.1_T9	KRY19419.1_T12	TP11706_T4	KRZ74898.1_T10	KRZ09731.1_T11
2265	EFV50293_T1	KRZ56405.1_T2	KRY53086.1_T3	KRX45929.1_T5	KRX73324.1_T6	KRX28204.1_T7	KRZ91423.1_T8	KRX66998.1_T9	KRY19404.1_T12	TP11709_T4	KRZ74940.1_T10	KRZ09762.1_T11
2266	EFV50305_T1	KRZ56384.1_T2	KRY53063.1_T3	KRX45927.1_T5	KRX73323.1_T6	KRX28070.1_T7	KRZ91481.1_T8	KRX66869.1_T9	KRY19399.1_T12	TP11716_T4	KRZ74863.1_T10	KRZ09776.1_T11
2267	EFV50306_T1	KRZ56404.1_T2	KRY53076.1_T3	KRX45931.1_T5	KRX73308.1_T6	KRX28376.1_T7	KRZ91459.1_T8	KRX66876.1_T9	KRY19417.1_T12	TP11717_T4	KRZ74929.1_T10	KRZ09750.1_T11
2268	EFV50307_T1	KRZ56400.1_T2	KRY53099.1_T3	KRX45898.1_T5	KRX73307.1_T6	KRX28046.1_T7	KRZ91425.1_T8	KRX66857.1_T9	KRY19364.1_T12	TP11718_T4	KRZ74933.1_T10	KRZ09758.1_T11
2269	EFV50308_T1	KRZ56399.1_T2	KRY53057.1_T3	KRX45919.1_T5	KRX73292.1_T6	KRX28274.1_T7	KRZ91473.1_T8	KRX66922.1_T9	KRY19427.1_T12	TP11719_T4	KRZ74892.1_T10	KRZ09790.1_T11
2271	EFV50314_T1	KRZ56367.1_T2	KRY53056.1_T3	KRX45932.1_T5	KRX71609.1_T6	KRX28375.1_T7	KRZ91405.1_T8	KRX66901.1_T9	KRY19395.1_T12	TP11725_T4	KRZ74931.1_T10	KRZ09735.1_T11
2272	EFV50315_T1	KRZ56369.1_T2	KRY53085.1_T3	KRX45934.1_T5	KRX71608.1_T6	KRX28116.1_T7	KRZ91488.1_T8	KRX66985.1_T9	KRY19345.1_T12	TP11726_T4	KRZ74904.1_T10	KRZ09730.1_T11
2273	EFV50316_T1	KRZ56372.1_T2	KRY53061.1_T3	KRX45918.1_T5	KRX71622.1_T6	KRX27946.1_T7	KRZ91413.1_T8	KRX66854.1_T9	KRY19422.1_T12	TP11727_T4	KRZ74888.1_T10	KRZ09771.1_T11
2274	EFV50320_T1	KRZ56353.1_T2	KRY53067.1_T3	KRX45905.1_T5	KRX71623.1_T6	KRX28337.1_T7	KRZ91455.1_T8	KRX66960.1_T9	KRY19415.1_T12	TP11732_T4	KRZ74881.1_T10	KRZ09746.1_T11
2275	EFV50328_T1	KRZ56392.1_T2	KRY53073.1_T3	KRX45930.1_T5	KRX71602.1_T6	KRX27953.1_T7	KRZ91440.1_T8	KRX66955.1_T9	KRY19344.1_T12	TP11737_T4	KRZ74865.1_T10	KRZ09777.1_T11
2276	EFV50329_T1	KRZ56358.1_T2	KRY53080.1_T3	KRX45900.1_T5	KRX71626.1_T6	KRX27955.1_T7	KRZ91485.1_T8	KRX66972.1_T9	KRY19428.1_T12	TP11738_T4	KRZ74896.1_T10	KRZ09733.1_T11
2277	EFV50332_T1	KRZ56371.1_T2	KRY53055.1_T3	KRX45896.1_T5	KRX71607.1_T6	KRX28036.1_T7	KRZ91432.1_T8	KRX66984.1_T9	KRY19426.1_T12	TP11741_T4	KRZ74937.1_T10	KRZ09761.1_T11
2278	EFV50333_T1	KRZ56362.1_T2	KRY53078.1_T3	KRX45901.1_T5	KRX71604.1_T6	KRX28160.1_T7	KRZ91428.1_T8	KRX66938.1_T9	KRY19406.1_T12	TP11742_T4	KRZ74891.1_T10	KRZ09751.1_T11
2279	EFV50334_T1	KRZ56368.1_T2	KRY53051.1_T3	KRX45902.1_T5	KRX71615.1_T6	KRX28215.1_T7	KRZ91411.1_T8	KRX66852.1_T9	KRY19424.1_T12	TP11743_T4	KRZ74906.1_T10	KRZ09727.1_T11
2280	EFV50347_T1	KRZ57427.1_T2	KRY59835.1_T3	KRX45366.1_T5	KRX78660.1_T6	KRX14067.1_T7	KRZ95051.1_T8	KRX58494.1_T9	KRY16088.1_T12	TP03197_T4	KRZ65983.1_T10	KRZ06696.1_T11
2282	EFV50371_T1	KRZ57439.1_T2	KRY59832.1_T3	KRX40018.1_T5	KRX78632.1_T6	KRX17325.1_T7	KRZ96773.1_T8	KRX58461.1_T9	KRY16067.1_T12	TP03218_T4	KRZ74093.1_T10	KRZ06694.1_T11
2283	EFV50372_T1	KRZ57470.1_T2	KRY59809.1_T3	KRX40022.1_T5	KRX78651.1_T6	KRX17388.1_T7	KRZ96793.1_T8	KRX58466.1_T9	KRY16056.1_T12	TP03217_T4	KRZ74067.1_T10	KRZ06729.1_T11
2284	EFV50373_T1	KRZ57460.1_T2	KRY59943.1_T3	KRX40025.1_T5	KRX78669.1_T6	KRX17323.1_T7	KRZ96774.1_T8	KRX58506.1_T9	KRY16053.1_T12	TP03216_T4	KRZ74026.1_T10	KRZ06708.1_T11
2285	EFV50374_T1	KRZ57448.1_T2	KRY59923.1_T3	KRX40024.1_T5	KRX78612.1_T6	KRX17369.1_T7	KRZ96714.1_T8	KRX58437.1_T9	KRY16060.1_T12	TP03215_T4	KRZ74047.1_T10	KRZ06718.1_T11
2286	EFV50375_T1	KRZ57446.1_T2	KRY59790.1_T3	KRX40043.1_T5	KRX78649.1_T6	KRX17333.1_T7	KRZ96683.1_T8	KRX58503.1_T9	KRY16076.1_T12	TP03214_T4	KRZ74030.1_T10	KRZ06709.1_T11
2287	EFV50376_T1	KRZ57450.1_T2	KRY59799.1_T3	KRX40033.1_T5	KRX78643.1_T6	KRX17324.1_T7	KRZ96876.1_T8	KRX58432.1_T9	KRY16104.1_T12	TP03213_T4	KRZ74092.1_T10	KRZ06720.1_T11
2288	EFV50377_T1	KRZ57418.1_T2	KRY59920.1_T3	KRX40032.1_T5	KRX78647.1_T6	KRX17315.1_T7	KRZ96766.1_T8	KRX58453.1_T9	KRY16063.1_T12	TP03212_T4	KRZ74082.1_T10	KRZ06731.1_T11
2289	EFV50385_T1	KRZ57474.1_T2	KRY59812.1_T3	KRX40019.1_T5	KRX78661.1_T6	KRX17314.1_T7	KRZ96842.1_T8	KRX58496.1_T9	KRY16098.1_T12	TP03210_T4	KRZ74058.1_T10	KRZ06730.1_T11
2290	EFV50386_T1	KRZ57429.1_T2	KRY59892.1_T3	KRX40020.1_T5	KRX78592.1_T6	KRX17341.1_T7	KRZ96638.1_T8	KRX58465.1_T9	KRY16097.1_T12	TP03209_T4	KRZ74052.1_T10	KRZ06724.1_T11
2291	EFV50387_T1	KRZ57437.1_T2	KRY59805.1_T3	KRX45355.1_T5	KRX78624.1_T6	KRX17343.1_T7	KRZ85350.1_T8	KRX58439.1_T9	KRY16064.1_T12	TP03208_T4	KRZ74065.1_T10	KRZ06714.1_T11
2292	EFV50391_T1	KRZ57461.1_T2	KRY59798.1_T3	KRX45385.1_T5	KRX78603.1_T6	KRX17384.1_T7	KRZ85342.1_T8	KRX58501.1_T9	KRY16059.1_T12	TP03205_T4	KRZ74070.1_T10	KRZ06725.1_T11
2293	EFV50397_T1	KRZ53647.1_T2	KRY46200.1_T3	KRX36486.1_T5	KRX78528.1_T6	KRX25358.1_T7	KRZ95587.1_T8	KRX59233.1_T9	KRY08831.1_T12	TP06033_T4	KRZ66982.1_T10	KRZ15982.1_T11
2294	EFV50398_T1	KRZ53683.1_T2	KRY46186.1_T3	KRX36483.1_T5	KRX78530.1_T6	KRX25383.1_T7	KRZ95667.1_T8	KRX59203.1_T9	KRY08839.1_T12	TP06034_T4	KRZ66990.1_T10	KRZ15938.1_T11
2295	EFV50399_T1	KRZ53673.1_T2	KRY46194.1_T3	KRX36482.1_T5	KRX78538.1_T6	KRX25472.1_T7	KRZ95719.1_T8	KRX59246.1_T9	KRY08827.1_T12	TP06035_T4	KRZ66984.1_T10	KRZ15968.1_T11
2296	EFV50400_T1	KRZ53660.1_T2	KRY46207.1_T3	KRX36487.1_T5	KRX78545.1_T6	KRX25324.1_T7	KRZ95584.1_T8	KRX59245.1_T9	KRY08833.1_T12	TP06036_T4	KRZ66994.1_T10	KRZ16010.1_T11
2297	EFV50401_T1	KRZ51005.1_T2	KRY45711.1_T3	KRX40861.1_T5	KRX78536.1_T6	KRX25497.1_T7	KRZ82705.1_T8	KRX60068.1_T9	KRY14104.1_T12	TP06038_T4	KRZ66981.1_T10	KRZ15957.1_T11
2298	EFV50404_T1	KRZ51002.1_T2	KRY45714.1_T3	KRX40853.1_T5	KRX78553.1_T6	KRX25389.1_T7	KRZ82703.1_T8	KRX60083.1_T9	KRY14106.1_T12	TP06040_T4	KRZ66993.1_T10	KRZ15936.1_T11
2300	EFV50449_T1	KRZ56338.1_T2	KRY45932.1_T3	KRX36375.1_T5	KRX77549.1_T6	KRX14623.1_T7	KRZ84571.1_T8	KRX61964.1_T9	KRY14261.1_T12	TP06087_T4	KRZ69663.1_T10	KRZ15166.1_T11
2301	EFV50450_T1	KRZ56348.1_T2	KRY45935.1_T3	KRX36374.1_T5	KRX77506.1_T6	KRX14644.1_T7	KRZ84552.1_T8	KRX61931.1_T9	KRY14263.1_T12	TP06088_T4	KRZ69643.1_T10	KRZ15174.1_T11
2302	EFV50451_T1	KRZ56332.1_T2	KRY45938.1_T3	KRX36377.1_T5	KRX77493.1_T6	KRX14631.1_T7	KRZ84551.1_T8	KRX61880.1_T9	KRY14265.1_T12	TP06089_T4	KRZ69662.1_T10	KRZ15207.1_T11
2303	EFV50452_T1	KRZ56298.1_T2	KRY45929.1_T3	KRX36384.1_T5	KRX77504.1_T6	KRX14619.1_T7	KRZ84562.1_T8	KRX61855.1_T9	KRY14259.1_T12	TP06090_T4	KRZ69646.1_T10	KRZ15160.1_T11
2304	EFV50458_T1	KRZ50854.1_T2	KRY47111.1_T3	KRX45968.1_T5	KRX70099.1_T6	KRX14640.1_T7	KRZ84567.1_T8	KRX52455.1_T9	KRY10241.1_T12	TP06099_T4	KRZ71374.1_T10	KRZ15181.1_T11
2305	EFV50469_T1	KRZ49586.1_T2	KRY47559.1_T3	KRX38115.1_T5	KRX77494.1_T6	KRX18663.1_T7	KRZ84555.1_T8	KRX52553.1_T9	KRY14282.1_T12	TP06078_T4	KRZ69640.1_T10	KRZ01343.1_T11
2306	EFV50470_T1	KRZ49573.1_T2	KRY47570.1_T3	KRX38102.1_T5	KRX77513.1_T6	KRX18712.1_T7	KRZ84572.1_T8	KRX52550.1_T9	KRY14277.1_T12	TP06079_T4	KRZ69637.1_T10	KRZ01346.1_T11
2307	EFV50475_T1	KRZ49575.1_T2	KRY47558.1_T3	KRX38111.1_T5	KRX77515.1_T6	KRX18723.1_T7	KRZ84549.1_T8	KRX52551.1_T9	KRY14295.1_T12	TP06084_T4	KRZ69671.1_T10	KRZ15184.1_T11
2308	EFV50480_T1	KRZ49578.1_T2	KRY47578.1_T3	KRX38108.1_T5	KRX77484.1_T6	KRX18799.1_T7	KRZ88618.1_T8	KRX52547.1_T9	KRY14262.1_T12	TP06071_T4	KRZ70259.1_T10	KRZ02068.1_T11
2309	EFV50495_T1	KRZ50629.1_T2	KRY56510.1_T3	KRX39034.1_T5	KRX83030.1_T6	KRX18756.1_T7	KRZ95673.1_T8	KRX61686.1_T9	KRY15628.1_T12	TP06058_T4	KRZ75660.1_T10	KRZ02625.1_T11
2310	EFV50515_T1	KRZ49166.1_T2	KRY49771.1_T3	KRX48862.1_T5	KRX71358.1_T6	KRX13226.1_T7	KRZ86346.1_T8	KRX53159.1_T9	KRY08597.1_T12	TP06050_T4	KRZ75652.1_T10	KRZ15419.1_T11
2311	EFV50517_T1	KRZ49164.1_T2	KRY49747.1_T3	KRX48897.1_T5	KRX71339.1_T6	KRX13228.1_T7	KRZ86318.1_T8	KRX53167.1_T9	KRY08589.1_T12	TP06051_T4	KRZ75679.1_T10	KRZ15437.1_T11
2312	EFV50518_T1	KRZ49169.1_T2	KRY49744.1_T3	KRX48848.1_T5	KRX71333.1_T6	KRX13221.1_T7	KRZ86336.1_T8	KRX53182.1_T9	KRY08595.1_T12	TP06053_T4	KRZ75585.1_T10	KRZ15330.1_T11
2315	EFV50555_T1	KRZ54783.1_T2	KRY50927.1_T3	KRX37795.1_T5	KRX77510.1_T6	KRX23861.1_T7	KRZ87416.1_T8	KRX58106.1_T9	KRY10000.1_T12	TP10886_T4	KRZ76329.1_T10	KRZ17039.1_T11
2316	EFV50560_T1	KRZ54828.1_T2	KRY50920.1_T3	KRX37784.1_T5	KRX70057.1_T6	KRX23898.1_T7	KRZ87362.1_T8	KRX58090.1_T9	KRY09975.1_T12	TP10882_T4	KRZ78289.1_T10	KRZ17008.1_T11
2317	EFV50564_T1	KRZ54817.1_T2	KRY47543.1_T3	KRX36710.1_T5	KRX70065.1_T6	KRX23796.1_T7	KRZ87350.1_T8	KRX58137.1_T9	KRY14763.1_T12	TP10877_T4	KRZ78296.1_T10	KRZ16995.1_T11
2318	EFV50569_T1	KRZ49968.1_T2	KRY47538.1_T3	KRX36721.1_T5	KRX80919.1_T6	KRX23950.1_T7	KRZ87406.1_T8	KRX58118.1_T9	KRY14783.1_T12	TP10873_T4	KRZ78232.1_T10	KRZ17023.1_T11
2319	EFV50574_T1	KRZ52256.1_T2	KRY45740.1_T3	KRX46012.1_T5	KRX70192.1_T6	KRX23780.1_T7	KRZ87360.1_T8	KRX58089.1_T9	KRY14751.1_T12	TP10870_T4	KRZ78313.1_T10	KRZ16989.1_T11
2320	EFV50579_T1	KRZ50829.1_T2	KRY50452.1_T3	KRX42961.1_T5	KRX77322.1_T6	KRX17357.1_T7	KRZ83096.1_T8	KRX55694.1_T9	KRY14769.1_T12	TP10861_T4	KRZ78237.1_T10	KRZ17058.1_T11
2321	EFV50580_T1	KRZ50850.1_T2	KRY50486.1_T3	KRX42990.1_T5	KRX77335.1_T6	KRX17348.1_T7	KRZ83089.1_T8	KRX55704.1_T9	KRY14738.1_T12	TP10862_T4	KRZ78217.1_T10	KRZ16998.1_T11
2322	EFV50585_T1	KRZ50831.1_T2	KRY50465.1_T3	KRX42992.1_T5	KRX77374.1_T6	KRX25090.1_T7	KRZ83084.1_T8	KRX55730.1_T9	KRY14756.1_T12	TP10865_T4	KRZ78294.1_T10	KRZ17009.1_T11
2323	EFV50596_T1	KRZ51007.1_T2	KRY50478.1_T3	KRX42965.1_T5	KRX77368.1_T6	KRX24972.1_T7	KRZ97991.1_T8	KRX55705.1_T9	KRY09477.1_T12	TP10857_T4	KRZ78350.1_T10	KRZ17087.1_T11
2324	EFV50597_T1	KRZ51015.1_T2	KRY50484.1_T3	KRX42996.1_T5	KRX77365.1_T6	KRX25022.1_T7	KRZ98132.1_T8	KRX55693.1_T9	KRY09468.1_T12	TP10855_T4	KRZ78222.1_T10	KRZ17081.1_T11
2325	EFV50598_T1	KRZ51004.1_T2	KRY50453.1_T3	KRX42977.1_T5	KRX77334.1_T6	KRX24935.1_T7	KRZ98010.1_T8	KRX55726.1_T9	KRY09478.1_T12	TP10854_T4	KRZ78369.1_T10	KRZ16987.1_T11
2326	EFV50610_T1	KRZ48691.1_T2	KRY45090.1_T3	KRX35670.1_T5	KRX77327.1_T6	KRX24936.1_T7	KRZ97883.1_T8	KRX55731.1_T9	KRY08274.1_T12	TP10846_T4	KRZ78264.1_T10	KRZ17159.1_T11
2327	EFV50611_T1	KRZ48695.1_T2	KRY45092.1_T3	KRX35685.1_T5	KRX77333.1_T6	KRX24942.1_T7	KRZ98122.1_T8	KRX55728.1_T9	KRY08279.1_T12	TP10845_T4	KRZ78365.1_T10	KRZ17013.1_T11
2328	EFV50618_T1	KRZ58292.1_T2	KRY46223.1_T3	KRX45637.1_T5	KRX79161.1_T6	KRX22906.1_T7	KRZ87878.1_T8	KRX58685.1_T9	KRY16370.1_T12	TP10841_T4	KRZ75249.1_T10	KRZ17043.1_T11
2329	EFV50619_T1	KRZ58253.1_T2	KRY46211.1_T3	KRX45631.1_T5	KRX79211.1_T6	KRX22915.1_T7	KRZ87900.1_T8	KRX58703.1_T9	KRY16376.1_T12	TP10840_T4	KRZ75277.1_T10	KRZ17138.1_T11
2330	EFV50620_T1	KRZ58293.1_T2	KRY46208.1_T3	KRX45650.1_T5	KRX79165.1_T6	KRX22909.1_T7	KRZ87885.1_T8	KRX58720.1_T9	KRY16349.1_T12	TP10836_T4	KRZ75260.1_T10	KRZ17144.1_T11
2331	EFV50621_T1	KRZ58283.1_T2	KRY46219.1_T3	KRX45664.1_T5	KRX79204.1_T6	KRX22914.1_T7	KRZ87928.1_T8	KRX58683.1_T9	KRY16383.1_T12	TP10835_T4	KRZ75310.1_T10	KRZ17119.1_T11
2332	EFV50623_T1	KRZ58257.1_T2	KRY46209.1_T3	KRX45644.1_T5	KRX79186.1_T6	KRX22942.1_T7	KRZ87886.1_T8	KRX58684.1_T9	KRY16381.1_T12	TP10832_T4	KRZ75292.1_T10	KRZ17006.1_T11
2333	EFV50625_T1	KRZ58278.1_T2	KRY46217.1_T3	KRX45673.1_T5	KRX79177.1_T6	KRX22860.1_T7	KRZ87884.1_T8	KRX58707.1_T9	KRY16382.1_T12	TP10829_T4	KRZ75321.1_T10	KRZ17099.1_T11
2334	EFV50626_T1	KRZ58266.1_T2	KRY53236.1_T3	KRX45646.1_T5	KRX79179.1_T6	KRX22861.1_T7	KRZ87911.1_T8	KRX58686.1_T9	KRY16379.1_T12	TP10828_T4	KRZ75295.1_T10	KRZ17077.1_T11
2335	EFV50631_T1	KRZ58280.1_T2	KRY53233.1_T3	KRX45667.1_T5	KRX79218.1_T6	KRX22912.1_T7	KRZ87906.1_T8	KRX58724.1_T9	KRY16385.1_T12	TP10824_T4	KRZ75264.1_T10	KRZ17072.1_T11
2336	EFV50632_T1	KRZ58256.1_T2	KRY53240.1_T3	KRX45642.1_T5	KRX79192.1_T6	KRX22889.1_T7	KRZ87888.1_T8	KRX58717.1_T9	KRY16378.1_T12	TP10823_T4	KRZ75289.1_T10	KRZ17128.1_T11
2337	EFV50636_T1	KRZ58284.1_T2	KRY53225.1_T3	KRX45658.1_T5	KRX79230.1_T6	KRX22953.1_T7	KRZ87908.1_T8	KRX58691.1_T9	KRY16346.1_T12	TP10821_T4	KRZ75281.1_T10	KRZ17100.1_T11
2338	EFV50637_T1	KRZ58277.1_T2	KRY53215.1_T3	KRX45647.1_T5	KRX79233.1_T6	KRX22956.1_T7	KRZ87919.1_T8	KRX58721.1_T9	KRY16350.1_T12	TP10820_T4	KRZ75254.1_T10	KRZ17161.1_T11
2339	EFV50643_T1	KRZ58288.1_T2	KRY53242.1_T3	KRX36800.1_T5	KRX79235.1_T6	KRX22923.1_T7	KRZ87892.1_T8	KRX58715.1_T9	KRY16345.1_T12	TP10812_T4	KRZ75300.1_T10	KRZ17149.1_T11
2340	EFV50648_T1	KRZ58255.1_T2	KRY53224.1_T3	KRX36802.1_T5	KRX79225.1_T6	KRX22918.1_T7	KRZ87883.1_T8	KRX58729.1_T9	KRY16391.1_T12	TP10808_T4	KRZ75317.1_T10	KRZ17095.1_T11
2341	EFV50651_T1	KRZ49896.1_T2	KRY59688.1_T3	KRX38134.1_T5	KRX80924.1_T6	KRX22899.1_T7	KRZ88467.1_T8	KRX59238.1_T9	KRY21668.1_T12	TP10806_T4	KRZ75246.1_T10	KRZ17010.1_T11
2342	EFV50652_T1	KRZ49920.1_T2	KRY59662.1_T3	KRX38141.1_T5	KRX80910.1_T6	KRX22935.1_T7	KRZ88496.1_T8	KRX59192.1_T9	KRY21664.1_T12	TP10805_T4	KRZ75311.1_T10	KRZ16988.1_T11
2343	EFV50656_T1	KRZ49922.1_T2	KRY59702.1_T3	KRX38126.1_T5	KRX80931.1_T6	KRX22904.1_T7	KRZ88474.1_T8	KRX59257.1_T9	KRY21711.1_T12	TP10800_T4	KRZ72677.1_T10	KRZ17139.1_T11
2344	EFV50657_T1	KRZ49909.1_T2	KRY59668.1_T3	KRX38125.1_T5	KRX80896.1_T6	KRX22857.1_T7	KRZ88481.1_T8	KRX59187.1_T9	KRY21652.1_T12	TP10799_T4	KRZ72681.1_T10	KRZ17118.1_T11
2345	EFV50658_T1	KRZ49916.1_T2	KRY59782.1_T3	KRX38147.1_T5	KRX80951.1_T6	KRX22858.1_T7	KRZ88507.1_T8	KRX59241.1_T9	KRY21756.1_T12	TP10798_T4	KRZ72752.1_T10	KRZ17064.1_T11
2346	EFV50661_T1	KRZ49903.1_T2	KRY59745.1_T3	KRX38145.1_T5	KRX80985.1_T6	KRX22959.1_T7	KRZ88524.1_T8	KRX59252.1_T9	KRY21747.1_T12	TP10795_T4	KRZ72747.1_T10	KRZ17071.1_T11
2347	EFV50665_T1	KRZ51090.1_T2	KRY45116.1_T3	KRX38138.1_T5	KRX84602.1_T6	KRX22929.1_T7	KRZ83041.1_T8	KRX62380.1_T9	KRY08032.1_T12	TP10793_T4	KRZ72717.1_T10	KRZ17090.1_T11
2348	EFV50666_T1	KRZ51093.1_T2	KRY45117.1_T3	KRX38148.1_T5	KRX84575.1_T6	KRX22884.1_T7	KRZ83044.1_T8	KRX62383.1_T9	KRY08038.1_T12	TP10792_T4	KRZ72696.1_T10	KRZ17026.1_T11
2350	EFV50681_T1	KRZ54798.1_T2	KRY50958.1_T3	KRX37805.1_T5	KRX77538.1_T6	KRX23896.1_T7	KRZ87409.1_T8	KRX58170.1_T9	KRY09996.1_T12	TP10893_T4	KRZ76367.1_T10	KRZ17007.1_T11
2351	EFV50683_T1	KRZ54800.1_T2	KRY50955.1_T3	KRX37807.1_T5	KRX77505.1_T6	KRX23792.1_T7	KRZ87373.1_T8	KRX58086.1_T9	KRY10004.1_T12	TP10891_T4	KRZ76326.1_T10	KRZ17089.1_T11
2352	EFV50684_T1	KRZ54830.1_T2	KRY50934.1_T3	KRX37800.1_T5	KRX77486.1_T6	KRX23932.1_T7	KRZ87400.1_T8	KRX58112.1_T9	KRY10007.1_T12	TP10890_T4	KRZ76273.1_T10	KRZ17057.1_T11
2353	EFV50686_T1	KRZ54838.1_T2	KRY50942.1_T3	KRX37786.1_T5	KRX77534.1_T6	KRX23869.1_T7	KRZ87399.1_T8	KRX58153.1_T9	KRY09981.1_T12	TP10888_T4	KRZ76292.1_T10	KRZ17054.1_T11
2354	EFV50687_T1	KRZ54808.1_T2	KRY50925.1_T3	KRX37806.1_T5	KRX77508.1_T6	KRX23803.1_T7	KRZ87426.1_T8	KRX58172.1_T9	KRY10005.1_T12	TP10887_T4	KRZ76363.1_T10	KRZ17172.1_T11
2355	EFV50692_T1	KRZ49044.1_T2	KRY56552.1_T3	KRX36781.1_T5	KRX72204.1_T6	KRX18440.1_T7	KRZ86341.1_T8	KRX59652.1_T9	KRY08354.1_T12	TP10913_T4	KRZ69223.1_T10	KRZ17041.1_T11
2356	EFV50701_T1	KRZ55877.1_T2	KRY58608.1_T3	KRX37297.1_T5	KRX71803.1_T6	KRX18520.1_T7	KRZ83711.1_T8	KRX59636.1_T9	KRY09050.1_T12	TP10906_T4	KRZ69220.1_T10	KRZ17082.1_T11
2357	EFV50704_T1	KRZ55894.1_T2	KRY58550.1_T3	KRX37294.1_T5	KRX71801.1_T6	KRX18463.1_T7	KRZ83723.1_T8	KRX59706.1_T9	KRY09052.1_T12	TP10904_T4	KRZ69250.1_T10	KRZ17079.1_T11
2358	EFV50705_T1	KRZ55907.1_T2	KRY58585.1_T3	KRX37293.1_T5	KRX71813.1_T6	KRX18523.1_T7	KRZ83730.1_T8	KRX59673.1_T9	KRY09055.1_T12	TP10903_T4	KRZ69228.1_T10	KRZ17031.1_T11
2360	EFV50721_T1	KRZ48781.1_T2	KRY47120.1_T3	KRX46015.1_T5	KRX70103.1_T6	KRX18493.1_T7	KRZ88623.1_T8	KRX52451.1_T9	KRY10254.1_T12	TP10901_T4	KRZ69238.1_T10	KRZ17121.1_T11
2361	EFV50728_T1	KRZ54788.1_T2	KRY50945.1_T3	KRX37597.1_T5	KRX77530.1_T6	KRX18526.1_T7	KRZ87392.1_T8	KRX58164.1_T9	KRY09201.1_T12	TP10899_T4	KRZ69231.1_T10	KRZ17045.1_T11
2362	EFV50729_T1	KRZ54811.1_T2	KRY50952.1_T3	KRX37593.1_T5	KRX77531.1_T6	KRX18509.1_T7	KRZ87421.1_T8	KRX58095.1_T9	KRY09197.1_T12	TP10897_T4	KRZ69252.1_T10	KRZ17141.1_T11
2363	EFV50730_T1	KRZ54812.1_T2	KRY50937.1_T3	KRX37598.1_T5	KRX77482.1_T6	KRX18457.1_T7	KRZ87381.1_T8	KRX58096.1_T9	KRY09182.1_T12	TP10896_T4	KRZ69243.1_T10	KRZ17140.1_T11
2364	EFV50740_T1	KRZ54887.1_T2	KRY49860.1_T3	KRX37035.1_T5	KRX69933.1_T6	KRX13099.1_T7	KRZ85387.1_T8	KRX61763.1_T9	KRY08527.1_T12	TP11017_T4	KRZ67550.1_T10	KRZ01992.1_T11
2365	EFV50744_T1	KRZ57740.1_T2	KRY51578.1_T3	KRX43511.1_T5	KRX73645.1_T6	KRX22431.1_T7	KRZ88562.1_T8	KRX60552.1_T9	KRY12052.1_T12	TP11003_T4	KRZ71508.1_T10	KRZ11413.1_T11
2366	EFV50753_T1	KRZ57763.1_T2	KRY51593.1_T3	KRX43536.1_T5	KRX73647.1_T6	KRX22443.1_T7	KRZ88570.1_T8	KRX60555.1_T9	KRY12068.1_T12	TP11008_T4	KRZ67543.1_T10	KRZ11373.1_T11
2368	EFV50761_T1	KRZ48452.1_T2	KRY51573.1_T3	KRX35196.1_T5	KRX69309.1_T6	KRX22444.1_T7	KRZ83483.1_T8	KRX60499.1_T9	KRY08293.1_T12	TP11012_T4	KRZ67561.1_T10	KRZ02006.1_T11
2369	EFV50762_T1	KRZ48453.1_T2	KRY51592.1_T3	KRX35198.1_T5	KRX69306.1_T6	KRX22430.1_T7	KRZ83492.1_T8	KRX60522.1_T9	KRY08285.1_T12	TP11013_T4	KRZ67556.1_T10	KRZ01998.1_T11
2370	EFV50767_T1	KRZ54922.1_T2	KRY49837.1_T3	KRX37044.1_T5	KRX69948.1_T6	KRX13095.1_T7	KRZ85360.1_T8	KRX61703.1_T9	KRY08521.1_T12	TP11015_T4	KRZ67538.1_T10	KRZ01995.1_T11
2371	EFV50768_T1	KRZ54899.1_T2	KRY49840.1_T3	KRX37039.1_T5	KRX69951.1_T6	KRX13102.1_T7	KRZ85362.1_T8	KRX61756.1_T9	KRY08524.1_T12	TP11016_T4	KRZ67571.1_T10	KRZ02007.1_T11
2372	EFV50846_T1	KRZ55982.1_T2	KRY48746.1_T3	KRX40377.1_T5	KRX73999.1_T6	KRX19594.1_T7	KRZ93365.1_T8	KRX52435.1_T9	KRY10267.1_T12	TP10985_T4	KRZ71509.1_T10	KRZ03626.1_T11
2373	EFV50848_T1	KRZ55936.1_T2	KRY48748.1_T3	KRX40354.1_T5	KRX73981.1_T6	KRX19636.1_T7	KRZ93312.1_T8	KRX52439.1_T9	KRY10271.1_T12	TP10986_T4	KRZ71517.1_T10	KRZ03630.1_T11
2374	EFV50849_T1	KRZ55941.1_T2	KRY48716.1_T3	KRX40361.1_T5	KRX73983.1_T6	KRX19564.1_T7	KRZ93334.1_T8	KRX53337.1_T9	KRY10276.1_T12	TP10988_T4	KRZ71527.1_T10	KRZ03619.1_T11
2375	EFV50850_T1	KRZ55934.1_T2	KRY48715.1_T3	KRX40366.1_T5	KRX73973.1_T6	KRX19598.1_T7	KRZ93355.1_T8	KRX53338.1_T9	KRY10289.1_T12	TP10989_T4	KRZ71512.1_T10	KRZ03635.1_T11
2376	EFV50852_T1	KRZ55933.1_T2	KRY48734.1_T3	KRX40380.1_T5	KRX75088.1_T6	KRX19615.1_T7	KRZ83655.1_T8	KRX53340.1_T9	KRY10284.1_T12	TP10991_T4	KRZ71510.1_T10	KRZ03625.1_T11
2377	EFV50855_T1	KRZ55960.1_T2	KRY48730.1_T3	KRX40368.1_T5	KRX75053.1_T6	KRX19567.1_T7	KRZ83659.1_T8	KRX53331.1_T9	KRY10277.1_T12	TP10993_T4	KRZ71501.1_T10	KRZ03627.1_T11
2378	EFV50856_T1	KRZ55930.1_T2	KRY48737.1_T3	KRX40363.1_T5	KRX75087.1_T6	KRX19590.1_T7	KRZ83647.1_T8	KRX53329.1_T9	KRY10262.1_T12	TP10994_T4	KRZ71522.1_T10	KRZ11409.1_T11
2379	EFV50859_T1	KRZ55967.1_T2	KRY48725.1_T3	KRX40360.1_T5	KRX75098.1_T6	KRX19609.1_T7	KRZ83651.1_T8	KRX53328.1_T9	KRY10279.1_T12	TP10997_T4	KRZ71492.1_T10	KRZ11355.1_T11
2380	EFV50877_T1	KRZ48359.1_T2	KRY45908.1_T3	KRX35321.1_T5	KRX70513.1_T6	KRX20150.1_T7	KRZ93387.1_T8	KRX60050.1_T9	KRY14120.1_T12	TP10958_T4	KRZ73741.1_T10	KRZ10964.1_T11
2381	EFV50878_T1	KRZ48366.1_T2	KRY46069.1_T3	KRX37428.1_T5	KRX70510.1_T6	KRX20173.1_T7	KRZ93370.1_T8	KRX60078.1_T9	KRY14122.1_T12	TP10965_T4	KRZ73721.1_T10	KRZ10993.1_T11
2382	EFV50912_T1	KRZ52547.1_T2	KRY49859.1_T3	KRX45957.1_T5	KRX75091.1_T6	KRX19968.1_T7	KRZ85816.1_T8	KRX56853.1_T9	KRY19022.1_T12	TP10939_T4	KRZ73734.1_T10	KRZ11389.1_T11
2383	EFV50913_T1	KRZ52523.1_T2	KRY49863.1_T3	KRX45989.1_T5	KRX75056.1_T6	KRX20050.1_T7	KRZ85827.1_T8	KRX56893.1_T9	KRY19043.1_T12	TP10938_T4	KRZ73748.1_T10	KRZ11363.1_T11
2384	EFV50918_T1	KRZ52543.1_T2	KRY49867.1_T3	KRX45961.1_T5	KRX75079.1_T6	KRX19970.1_T7	KRZ85807.1_T8	KRX56875.1_T9	KRY19056.1_T12	TP10934_T4	KRZ73713.1_T10	KRZ11396.1_T11
2385	EFV50920_T1	KRZ52546.1_T2	KRY49846.1_T3	KRX46007.1_T5	KRX75094.1_T6	KRX19937.1_T7	KRZ85833.1_T8	KRX56871.1_T9	KRY19017.1_T12	TP10931_T4	KRZ73753.1_T10	KRZ11349.1_T11
2386	EFV50922_T1	KRZ52539.1_T2	KRY49872.1_T3	KRX45954.1_T5	KRX75068.1_T6	KRX20060.1_T7	KRZ85829.1_T8	KRX56891.1_T9	KRY18972.1_T12	TP10929_T4	KRZ67379.1_T10	KRZ11415.1_T11
2387	EFV50936_T1	KRZ52529.1_T2	KRY49869.1_T3	KRX35745.1_T5	KRX71314.1_T6	KRX20055.1_T7	KRZ85820.1_T8	KRX56882.1_T9	KRY08385.1_T12	TP10948_T4	KRZ73744.1_T10	KRZ11401.1_T11
2388	EFV50940_T1	KRZ52532.1_T2	KRY49873.1_T3	KRX46018.1_T5	KRX75085.1_T6	KRX19988.1_T7	KRZ85819.1_T8	KRX56855.1_T9	KRY18993.1_T12	TP10944_T4	KRZ73695.1_T10	KRZ11342.1_T11
2389	EFV50941_T1	KRZ52535.1_T2	KRY49855.1_T3	KRX45975.1_T5	KRX75067.1_T6	KRX20040.1_T7	KRZ85842.1_T8	KRX56867.1_T9	KRY19044.1_T12	TP10943_T4	KRZ73756.1_T10	KRZ11344.1_T11
2392	EFV50973_T1	KRZ49869.1_T2	KRY51936.1_T3	KRX38432.1_T5	KRX74737.1_T6	KRX16675.1_T7	KRZ83160.1_T8	KRX56746.1_T9	KRY09014.1_T12	TP05713_T4	KRZ77721.1_T10	KRZ08209.1_T11
2393	EFV50980_T1	KRZ50874.1_T2	KRY48262.1_T3	KRX42878.1_T5	KRX74694.1_T6	KRX15076.1_T7	KRZ88077.1_T8	KRX53604.1_T9	KRY18402.1_T12	TP05692_T4	KRZ77673.1_T10	KRZ08178.1_T11
2394	EFV50981_T1	KRZ50880.1_T2	KRY48259.1_T3	KRX42884.1_T5	KRX74696.1_T6	KRX15087.1_T7	KRZ88112.1_T8	KRX53615.1_T9	KRY18411.1_T12	TP05693_T4	KRZ77724.1_T10	KRZ08187.1_T11
2395	EFV50983_T1	KRZ50882.1_T2	KRY48258.1_T3	KRX42880.1_T5	KRX74678.1_T6	KRX15059.1_T7	KRZ88071.1_T8	KRX53619.1_T9	KRY18400.1_T12	TP05694_T4	KRZ77637.1_T10	KRZ08200.1_T11
2396	EFV50984_T1	KRZ50859.1_T2	KRY48277.1_T3	KRX42889.1_T5	KRX74706.1_T6	KRX15065.1_T7	KRZ88065.1_T8	KRX53605.1_T9	KRY18368.1_T12	TP05695_T4	KRZ77718.1_T10	KRZ08232.1_T11
2398	EFV50992_T1	KRZ50885.1_T2	KRY48279.1_T3	KRX42869.1_T5	KRX74665.1_T6	KRX15062.1_T7	KRZ88120.1_T8	KRX53617.1_T9	KRY18431.1_T12	TP05700_T4	KRZ77739.1_T10	KRZ08192.1_T11
2399	EFV50993_T1	KRZ50860.1_T2	KRY48251.1_T3	KRX42896.1_T5	KRX74697.1_T6	KRX15067.1_T7	KRZ88066.1_T8	KRX53610.1_T9	KRY18369.1_T12	TP05701_T4	KRZ77654.1_T10	KRZ08221.1_T11
2401	EFV51028_T1	KRZ51311.1_T2	KRY52779.1_T3	KRX37684.1_T5	KRX70861.1_T6	KRX13705.1_T7	KRZ84387.1_T8	KRX52873.1_T9	KRY15224.1_T12	TP05683_T4	KRZ73084.1_T10	KRZ08190.1_T11
2402	EFV51047_T1	KRZ56636.1_T2	KRY52748.1_T3	KRX38673.1_T5	KRX72246.1_T6	KRX13646.1_T7	KRZ83938.1_T8	KRX53399.1_T9	KRY15210.1_T12	TP05657_T4	KRZ73162.1_T10	KRZ03269.1_T11
2403	EFV51048_T1	KRZ56649.1_T2	KRY52766.1_T3	KRX38692.1_T5	KRX72250.1_T6	KRX13638.1_T7	KRZ83929.1_T8	KRX53408.1_T9	KRY15209.1_T12	TP05658_T4	KRZ73209.1_T10	KRZ03277.1_T11
2404	EFV51059_T1	KRZ56616.1_T2	KRY52726.1_T3	KRX38700.1_T5	KRX72227.1_T6	KRX18795.1_T7	KRZ83925.1_T8	KRX61147.1_T9	KRY15215.1_T12	TP05648_T4	KRZ73163.1_T10	KRZ01733.1_T11
2405	EFV51060_T1	KRZ56647.1_T2	KRY52768.1_T3	KRX38671.1_T5	KRX72241.1_T6	KRX18803.1_T7	KRZ83917.1_T8	KRX61121.1_T9	KRY15232.1_T12	TP05649_T4	KRZ73164.1_T10	KRZ01731.1_T11
2406	EFV51068_T1	KRZ56637.1_T2	KRY52780.1_T3	KRX38669.1_T5	KRX72253.1_T6	KRX12902.1_T7	KRZ83915.1_T8	KRX53386.1_T9	KRY15266.1_T12	TP05651_T4	KRZ73135.1_T10	KRZ03266.1_T11
2407	EFV51075_T1	KRZ50926.1_T2	KRY47011.1_T3	KRX34388.1_T5	KRX78769.1_T6	KRX22917.1_T7	KRZ84532.1_T8	KRX61097.1_T9	KRY07698.1_T12	TP05643_T4	KRZ67603.1_T10	KRZ11449.1_T11
2408	EFV51083_T1	KRZ52298.1_T2	KRY47328.1_T3	KRX36627.1_T5	KRX78790.1_T6	KRX22922.1_T7	KRZ84535.1_T8	KRX59207.1_T9	KRY10978.1_T12	TP05642_T4	KRZ67613.1_T10	KRZ11530.1_T11
2409	EFV51097_T1	KRZ52287.1_T2	KRY47340.1_T3	KRX36629.1_T5	KRX78773.1_T6	KRX22943.1_T7	KRZ84536.1_T8	KRX59226.1_T9	KRY10985.1_T12	TP05641_T4	KRZ67606.1_T10	KRZ11435.1_T11
2410	EFV51115_T1	KRZ49543.1_T2	KRY45993.1_T3	KRX35017.1_T5	KRX69866.1_T6	KRX18146.1_T7	KRZ82533.1_T8	KRX52061.1_T9	KRY08678.1_T12	TP05620_T4	KRZ67623.1_T10	KRZ08893.1_T11
2411	EFV51118_T1	KRZ49038.1_T2	KRY45995.1_T3	KRX38788.1_T5	KRX69870.1_T6	KRX18132.1_T7	KRZ82534.1_T8	KRX52069.1_T9	KRY08683.1_T12	TP05621_T4	KRZ67622.1_T10	KRZ08901.1_T11
2412	EFV51123_T1	KRZ49526.1_T2	KRY45999.1_T3	KRX39133.1_T5	KRX78466.1_T6	KRX13261.1_T7	KRZ88912.1_T8	KRX61732.1_T9	KRY08680.1_T12	TP05617_T4	KRZ72715.1_T10	KRZ14503.1_T11
2413	EFV51143_T1	KRZ54447.1_T2	KRY47345.1_T3	KRX35616.1_T5	KRX72070.1_T6	KRX14228.1_T7	KRZ83596.1_T8	KRX64738.1_T9	KRY13777.1_T12	TP04847_T4	KRZ75296.1_T10	KRZ08903.1_T11
2414	EFV51148_T1	KRZ54432.1_T2	KRY46317.1_T3	KRX35613.1_T5	KRX72054.1_T6	KRX14215.1_T7	KRZ83579.1_T8	KRX64855.1_T9	KRY13800.1_T12	TP04849_T4	KRZ75263.1_T10	KRZ08861.1_T11
2415	EFV51149_T1	KRZ54418.1_T2	KRY46312.1_T3	KRX35619.1_T5	KRX72065.1_T6	KRX14220.1_T7	KRZ83599.1_T8	KRX64822.1_T9	KRY13770.1_T12	TP04850_T4	KRZ75255.1_T10	KRZ08865.1_T11
2416	EFV51151_T1	KRZ50323.1_T2	KRY51944.1_T3	KRX42427.1_T5	KRX74690.1_T6	KRX14216.1_T7	KRZ82773.1_T8	KRX55030.1_T9	KRY09089.1_T12	TP03713_T4	KRZ75247.1_T10	KRZ08841.1_T11
2418	EFV51173_T1	KRZ56317.1_T2	KRY59652.1_T3	KRX35602.1_T5	KRX69525.1_T6	KRX26059.1_T7	KRZ88452.1_T8	KRX59315.1_T9	KRY13136.1_T12	TP04839_T4	KRZ74157.1_T10	KRZ01758.1_T11
2419	EFV51174_T1	KRZ59138.1_T2	KRY55352.1_T3	KRX48258.1_T5	KRX73343.1_T6	KRX26505.1_T7	KRZ89794.1_T8	KRX67182.1_T9	KRY11662.1_T12	TP01358_T4	KRZ72407.1_T10	KRZ07565.1_T11
2420	EFV51201_T1	KRZ49616.1_T2	KRY46230.1_T3	KRX35458.1_T5	KRX70473.1_T6	KRX13346.1_T7	KRZ85354.1_T8	KRX68611.1_T9	KRY08412.1_T12	TP04726_T4	KRZ79614.1_T10	KRZ16694.1_T11
2421	EFV51202_T1	KRZ49612.1_T2	KRY46234.1_T3	KRX35457.1_T5	KRX70468.1_T6	KRX13334.1_T7	KRZ85389.1_T8	KRX68608.1_T9	KRY08419.1_T12	TP04727_T4	KRZ79529.1_T10	KRZ16678.1_T11
2422	EFV51205_T1	KRZ49891.1_T2	KRY46239.1_T3	KRX35465.1_T5	KRX70477.1_T6	KRX13337.1_T7	KRZ85400.1_T8	KRX68548.1_T9	KRY08417.1_T12	TP04732_T4	KRZ79601.1_T10	KRZ16723.1_T11
2423	EFV51221_T1	KRZ49679.1_T2	KRY46933.1_T3	KRX46964.1_T5	KRX74086.1_T6	KRX26223.1_T7	KRZ84103.1_T8	KRX52653.1_T9	KRY09410.1_T12	TP04768_T4	KRZ66400.1_T10	KRZ16706.1_T11
2424	EFV51222_T1	KRZ49676.1_T2	KRY46955.1_T3	KRX46978.1_T5	KRX74092.1_T6	KRX26290.1_T7	KRZ84107.1_T8	KRX52636.1_T9	KRY09415.1_T12	TP04766_T4	KRZ66416.1_T10	KRZ16650.1_T11
2425	EFV51223_T1	KRZ49685.1_T2	KRY46950.1_T3	KRX47022.1_T5	KRX74082.1_T6	KRX26231.1_T7	KRZ84098.1_T8	KRX52639.1_T9	KRY09404.1_T12	TP04765_T4	KRZ66417.1_T10	KRZ16573.1_T11
2426	EFV51224_T1	KRZ49683.1_T2	KRY46947.1_T3	KRX46972.1_T5	KRX74107.1_T6	KRX26216.1_T7	KRZ84100.1_T8	KRX52640.1_T9	KRY09406.1_T12	TP04764_T4	KRZ66412.1_T10	KRZ16666.1_T11
2427	EFV51225_T1	KRZ49686.1_T2	KRY46960.1_T3	KRX46949.1_T5	KRX74104.1_T6	KRX26188.1_T7	KRZ84106.1_T8	KRX52645.1_T9	KRY09408.1_T12	TP04763_T4	KRZ66420.1_T10	KRZ16630.1_T11
2428	EFV51228_T1	KRZ49668.1_T2	KRY46949.1_T3	KRX46996.1_T5	KRX74099.1_T6	KRX26209.1_T7	KRZ84088.1_T8	KRX52642.1_T9	KRY09400.1_T12	TP04761_T4	KRZ66397.1_T10	KRZ16583.1_T11
2431	EFV51273_T1	KRZ55892.1_T2	KRY45860.1_T3	KRX49032.1_T5	KRX69927.1_T6	KRX26715.1_T7	KRZ92336.1_T8	KRX52585.1_T9	KRY08716.1_T12	TP04780_T4	KRZ77846.1_T10	KRZ11548.1_T11
2432	EFV51275_T1	KRZ55913.1_T2	KRY45868.1_T3	KRX49034.1_T5	KRX69926.1_T6	KRX26602.1_T7	KRZ92343.1_T8	KRX52599.1_T9	KRY08714.1_T12	TP04778_T4	KRZ77900.1_T10	KRZ11555.1_T11
2433	EFV51276_T1	KRZ55896.1_T2	KRY45861.1_T3	KRX49048.1_T5	KRX69931.1_T6	KRX26730.1_T7	KRZ92357.1_T8	KRX52584.1_T9	KRY08717.1_T12	TP04777_T4	KRZ77889.1_T10	KRZ11469.1_T11
2434	EFV51279_T1	KRZ55901.1_T2	KRY54910.1_T3	KRX34665.1_T5	KRX69922.1_T6	KRX26822.1_T7	KRZ91897.1_T8	KRX52586.1_T9	KRY08712.1_T12	TP04774_T4	KRZ77300.1_T10	KRZ11443.1_T11
2435	EFV51280_T1	KRZ55895.1_T2	KRY54917.1_T3	KRX34667.1_T5	KRX69916.1_T6	KRX26657.1_T7	KRZ91942.1_T8	KRX52597.1_T9	KRY08706.1_T12	TP04773_T4	KRZ77315.1_T10	KRZ11444.1_T11
2436	EFV51282_T1	KRZ47792.1_T2	KRY54936.1_T3	KRX34666.1_T5	KRX69914.1_T6	KRX26734.1_T7	KRZ91939.1_T8	KRX52587.1_T9	KRY08710.1_T12	TP04770_T4	KRZ77323.1_T10	KRZ11545.1_T11
2438	EFV51304_T1	KRZ48461.1_T2	KRY47063.1_T3	KRX37312.1_T5	KRX71133.1_T6	KRX13468.1_T7	KRZ85014.1_T8	KRX59707.1_T9	KRY09349.1_T12	TP04798_T4	KRZ79498.1_T10	KRZ02459.1_T11
2439	EFV51308_T1	KRZ48468.1_T2	KRY47049.1_T3	KRX37325.1_T5	KRX71124.1_T6	KRX13478.1_T7	KRZ85042.1_T8	KRX59664.1_T9	KRY09341.1_T12	TP04795_T4	KRZ79507.1_T10	KRZ11464.1_T11
2440	EFV51311_T1	KRZ55890.1_T2	KRY47046.1_T3	KRX37331.1_T5	KRX71062.1_T6	KRX13477.1_T7	KRZ85038.1_T8	KRX59654.1_T9	KRY09354.1_T12	TP04792_T4	KRZ79562.1_T10	KRZ11556.1_T11
2441	EFV51321_T1	KRZ49791.1_T2	KRY55009.1_T3	KRX36150.1_T5	KRX71130.1_T6	KRX14012.1_T7	KRZ89000.1_T8	KRX59661.1_T9	KRY19907.1_T12	TP04812_T4	KRZ66324.1_T10	KRZ02464.1_T11
2442	EFV51322_T1	KRZ55711.1_T2	KRY55053.1_T3	KRX36165.1_T5	KRX71137.1_T6	KRX13997.1_T7	KRZ88965.1_T8	KRX59686.1_T9	KRY19943.1_T12	TP04810_T4	KRZ66318.1_T10	KRZ02473.1_T11
2443	EFV51324_T1	KRZ55713.1_T2	KRY54965.1_T3	KRX36163.1_T5	KRX71131.1_T6	KRX14004.1_T7	KRZ88970.1_T8	KRX59685.1_T9	KRY19878.1_T12	TP04807_T4	KRZ66326.1_T10	KRZ02478.1_T11
2444	EFV51325_T1	KRZ55697.1_T2	KRY55007.1_T3	KRX36157.1_T5	KRX71147.1_T6	KRX13985.1_T7	KRZ89043.1_T8	KRX59662.1_T9	KRY19923.1_T12	TP04806_T4	KRZ66327.1_T10	KRZ02470.1_T11
2445	EFV51327_T1	KRZ55741.1_T2	KRY55037.1_T3	KRX36161.1_T5	KRX71117.1_T6	KRX14000.1_T7	KRZ89021.1_T8	KRX59665.1_T9	KRY19888.1_T12	TP04804_T4	KRZ66314.1_T10	KRZ02486.1_T11
2447	EFV51352_T1	KRZ48757.1_T2	KRY45577.1_T3	KRX35528.1_T5	KRX77289.1_T6	KRX21457.1_T7	KRZ82916.1_T8	KRX52097.1_T9	KRY09173.1_T12	TP04823_T4	KRZ66930.1_T10	KRZ04585.1_T11
2448	EFV51355_T1	KRZ59314.1_T2	KRY56654.1_T3	KRX35332.1_T5	KRX77283.1_T6	KRX21455.1_T7	KRZ84009.1_T8	KRX52257.1_T9	KRY08477.1_T12	TP04819_T4	KRZ74373.1_T10	KRZ04607.1_T11
2449	EFV51357_T1	KRZ59341.1_T2	KRY56649.1_T3	KRX35329.1_T5	KRX77257.1_T6	KRX21506.1_T7	KRZ84018.1_T8	KRX52252.1_T9	KRY08476.1_T12	TP04817_T4	KRZ74382.1_T10	KRZ04614.1_T11
2450	EFV51365_T1	KRZ51081.1_T2	KRY54753.1_T3	KRX45352.1_T5	KRX73368.1_T6	KRX13430.1_T7	KRZ90624.1_T8	KRX56539.1_T9	KRY13002.1_T12	TP03591_T4	KRZ70868.1_T10	KRZ04685.1_T11
2451	EFV51366_T1	KRZ51079.1_T2	KRY54744.1_T3	KRX45394.1_T5	KRX73352.1_T6	KRX13434.1_T7	KRZ90598.1_T8	KRX56525.1_T9	KRY12990.1_T12	TP03590_T4	KRZ70903.1_T10	KRZ04671.1_T11
2452	EFV51367_T1	KRZ51074.1_T2	KRY54761.1_T3	KRX45379.1_T5	KRX73371.1_T6	KRX13429.1_T7	KRZ90591.1_T8	KRX56526.1_T9	KRY12992.1_T12	TP03589_T4	KRZ70836.1_T10	KRZ04688.1_T11
2453	EFV51383_T1	KRZ52847.1_T2	KRY47845.1_T3	KRX39290.1_T5	KRX72571.1_T6	KRX24332.1_T7	KRZ94152.1_T8	KRX58226.1_T9	KRY11166.1_T12	TP03698_T4	KRZ72291.1_T10	KRZ04516.1_T11
2454	EFV51386_T1	KRZ52863.1_T2	KRY47838.1_T3	KRX39288.1_T5	KRX72577.1_T6	KRX24344.1_T7	KRZ94170.1_T8	KRX58223.1_T9	KRY11168.1_T12	TP03699_T4	KRZ72270.1_T10	KRZ04506.1_T11
2455	EFV51392_T1	KRZ52867.1_T2	KRY47849.1_T3	KRX39286.1_T5	KRX72580.1_T6	KRX24347.1_T7	KRZ94099.1_T8	KRX58194.1_T9	KRY11169.1_T12	TP03691_T4	KRZ72317.1_T10	KRZ04519.1_T11
2456	EFV51394_T1	KRZ52834.1_T2	KRY47834.1_T3	KRX39297.1_T5	KRX72558.1_T6	KRX24351.1_T7	KRZ94147.1_T8	KRX58231.1_T9	KRY11177.1_T12	TP04900_T4	KRZ72297.1_T10	KRZ04522.1_T11
2458	EFV51400_T1	KRZ52252.1_T2	KRY49087.1_T3	KRX39847.1_T5	KRX82965.1_T6	KRX24377.1_T7	KRZ94193.1_T8	KRX58207.1_T9	KRY11730.1_T12	TP03001_T4	KRZ72292.1_T10	KRZ03581.1_T11
2459	EFV51402_T1	KRZ52247.1_T2	KRY49088.1_T3	KRX39866.1_T5	KRX82896.1_T6	KRX24327.1_T7	KRZ94197.1_T8	KRX58219.1_T9	KRY11731.1_T12	TP03002_T4	KRZ72313.1_T10	KRZ03580.1_T11
2460	EFV51407_T1	KRZ52238.1_T2	KRY49081.1_T3	KRX39843.1_T5	KRX82959.1_T6	KRX24392.1_T7	KRZ94203.1_T8	KRX58203.1_T9	KRY11733.1_T12	TP03010_T4	KRZ72266.1_T10	KRZ03567.1_T11
2461	EFV51412_T1	KRZ52242.1_T2	KRY49086.1_T3	KRX39857.1_T5	KRX82905.1_T6	KRX24372.1_T7	KRZ94154.1_T8	KRX58188.1_T9	KRY11723.1_T12	TP03014_T4	KRZ72277.1_T10	KRZ03587.1_T11
2462	EFV51414_T1	KRZ52250.1_T2	KRY49055.1_T3	KRX39844.1_T5	KRX82879.1_T6	KRX24359.1_T7	KRZ94205.1_T8	KRX58214.1_T9	KRY11739.1_T12	TP03016_T4	KRZ72283.1_T10	KRZ03585.1_T11
2463	EFV51426_T1	KRZ52141.1_T2	KRY52865.1_T3	KRX38561.1_T5	KRX69259.1_T6	KRX14996.1_T7	KRZ89597.1_T8	KRX64460.1_T9	KRY12235.1_T12	TP07396_T4	KRZ71612.1_T10	KRZ05572.1_T11
2464	EFV51427_T1	KRZ52150.1_T2	KRY52834.1_T3	KRX38549.1_T5	KRX69258.1_T6	KRX14985.1_T7	KRZ89638.1_T8	KRX64518.1_T9	KRY12229.1_T12	TP07397_T4	KRZ71617.1_T10	KRZ05591.1_T11
2465	EFV51434_T1	KRZ52129.1_T2	KRY52877.1_T3	KRX38556.1_T5	KRX76468.1_T6	KRX14987.1_T7	KRZ89617.1_T8	KRX64494.1_T9	KRY12209.1_T12	TP07399_T4	KRZ71605.1_T10	KRZ05569.1_T11
2466	EFV51435_T1	KRZ52136.1_T2	KRY52855.1_T3	KRX38552.1_T5	KRX76482.1_T6	KRX14990.1_T7	KRZ89614.1_T8	KRX64502.1_T9	KRY12230.1_T12	TP07401_T4	KRZ71590.1_T10	KRZ05584.1_T11
2467	EFV51436_T1	KRZ52127.1_T2	KRY52875.1_T3	KRX38560.1_T5	KRX76458.1_T6	KRX15007.1_T7	KRZ89591.1_T8	KRX64489.1_T9	KRY12240.1_T12	TP07402_T4	KRZ71613.1_T10	KRZ05570.1_T11
2468	EFV51437_T1	KRZ52126.1_T2	KRY52883.1_T3	KRX38551.1_T5	KRX76469.1_T6	KRX14991.1_T7	KRZ89602.1_T8	KRX64523.1_T9	KRY12234.1_T12	TP07403_T4	KRZ71604.1_T10	KRZ05567.1_T11
2469	EFV51438_T1	KRZ52155.1_T2	KRY52880.1_T3	KRX38564.1_T5	KRX76465.1_T6	KRX15000.1_T7	KRZ89634.1_T8	KRX64531.1_T9	KRY12226.1_T12	TP07405_T4	KRZ71625.1_T10	KRZ05586.1_T11
2470	EFV51439_T1	KRZ52125.1_T2	KRY52882.1_T3	KRX38543.1_T5	KRX76474.1_T6	KRX15004.1_T7	KRZ89606.1_T8	KRX64476.1_T9	KRY12236.1_T12	TP07406_T4	KRZ71619.1_T10	KRZ05580.1_T11
2471	EFV51440_T1	KRZ52157.1_T2	KRY52876.1_T3	KRX38546.1_T5	KRX76446.1_T6	KRX14993.1_T7	KRZ89629.1_T8	KRX64466.1_T9	KRY12238.1_T12	TP07407_T4	KRZ71618.1_T10	KRZ05573.1_T11
2472	EFV51453_T1	KRZ49499.1_T2	KRY45683.1_T3	KRX35472.1_T5	KRX70521.1_T6	KRX15017.1_T7	KRZ92692.1_T8	KRX66226.1_T9	KRY12223.1_T12	TP07388_T4	KRZ66214.1_T10	KRZ01976.1_T11
2473	EFV51476_T1	KRZ51773.1_T2	KRY54921.1_T3	KRX40701.1_T5	KRX82917.1_T6	KRX15866.1_T7	KRZ88150.1_T8	KRX66201.1_T9	KRY13207.1_T12	TP07347_T4	KRZ79960.1_T10	KRZ10996.1_T11
2474	EFV51477_T1	KRZ51794.1_T2	KRY54949.1_T3	KRX40692.1_T5	KRX82929.1_T6	KRX15893.1_T7	KRZ88155.1_T8	KRX66176.1_T9	KRY13229.1_T12	TP07345_T4	KRZ79948.1_T10	KRZ10942.1_T11
2475	EFV51480_T1	KRZ51779.1_T2	KRY54958.1_T3	KRX40687.1_T5	KRX82883.1_T6	KRX15886.1_T7	KRZ88172.1_T8	KRX66169.1_T9	KRY13210.1_T12	TP07341_T4	KRZ80139.1_T10	KRZ10953.1_T11
2476	EFV51487_T1	KRZ51771.1_T2	KRY54927.1_T3	KRX40705.1_T5	KRX82925.1_T6	KRX15872.1_T7	KRZ88159.1_T8	KRX66225.1_T9	KRY13225.1_T12	TP07337_T4	KRZ80123.1_T10	KRZ11012.1_T11
2477	EFV51489_T1	KRZ51789.1_T2	KRY54909.1_T3	KRX40708.1_T5	KRX82937.1_T6	KRX15860.1_T7	KRZ88152.1_T8	KRX66215.1_T9	KRY13223.1_T12	TP07336_T4	KRZ79964.1_T10	KRZ10974.1_T11
2478	EFV51490_T1	KRZ51772.1_T2	KRY54907.1_T3	KRX40702.1_T5	KRX82972.1_T6	KRX15882.1_T7	KRZ88175.1_T8	KRX66290.1_T9	KRY13227.1_T12	TP07335_T4	KRZ79968.1_T10	KRZ11009.1_T11
2479	EFV51493_T1	KRZ51802.1_T2	KRY54923.1_T3	KRX40703.1_T5	KRX82933.1_T6	KRX15863.1_T7	KRZ88135.1_T8	KRX66260.1_T9	KRY13205.1_T12	TP07329_T4	KRZ79931.1_T10	KRZ10998.1_T11
2480	EFV51505_T1	KRZ52903.1_T2	KRY46180.1_T3	KRX41898.1_T5	KRX82912.1_T6	KRX15864.1_T7	KRZ83981.1_T8	KRX57309.1_T9	KRY09076.1_T12	TP07373_T4	KRZ80109.1_T10	KRZ11001.1_T11
2482	EFV51509_T1	KRZ52917.1_T2	KRY46173.1_T3	KRX41897.1_T5	KRX82938.1_T6	KRX15871.1_T7	KRZ83998.1_T8	KRX57321.1_T9	KRY09081.1_T12	TP07372_T4	KRZ80138.1_T10	KRZ10950.1_T11
2483	EFV51532_T1	KRZ57924.1_T2	KRY52850.1_T3	KRX42754.1_T5	KRX77806.1_T6	KRX20440.1_T7	KRZ91102.1_T8	KRX53950.1_T9	KRY10642.1_T12	TP03344_T4	KRZ68370.1_T10	KRZ04215.1_T11
2484	EFV51533_T1	KRZ57918.1_T2	KRY52879.1_T3	KRX42792.1_T5	KRX77792.1_T6	KRX20469.1_T7	KRZ91108.1_T8	KRX53936.1_T9	KRY10631.1_T12	TP03345_T4	KRZ68367.1_T10	KRZ04188.1_T11
2485	EFV51535_T1	KRZ57907.1_T2	KRY52874.1_T3	KRX42779.1_T5	KRX77827.1_T6	KRX20456.1_T7	KRZ91090.1_T8	KRX53932.1_T9	KRY10634.1_T12	TP03346_T4	KRZ68371.1_T10	KRZ04218.1_T11
2486	EFV51538_T1	KRZ57929.1_T2	KRY52857.1_T3	KRX42788.1_T5	KRX77823.1_T6	KRX20405.1_T7	KRZ91110.1_T8	KRX53935.1_T9	KRY10644.1_T12	TP03349_T4	KRZ68339.1_T10	KRZ04221.1_T11
2487	EFV51539_T1	KRZ57921.1_T2	KRY52878.1_T3	KRX42778.1_T5	KRX77810.1_T6	KRX20412.1_T7	KRZ91105.1_T8	KRX53941.1_T9	KRY10638.1_T12	TP03350_T4	KRZ68350.1_T10	KRZ04213.1_T11
2488	EFV51540_T1	KRZ57954.1_T2	KRY52862.1_T3	KRX42776.1_T5	KRX77819.1_T6	KRX20425.1_T7	KRZ91071.1_T8	KRX53947.1_T9	KRY10632.1_T12	TP03352_T4	KRZ68355.1_T10	KRZ04196.1_T11
2489	EFV51544_T1	KRZ57917.1_T2	KRY52861.1_T3	KRX42781.1_T5	KRX77839.1_T6	KRX20446.1_T7	KRZ91134.1_T8	KRX53945.1_T9	KRY10647.1_T12	TP03355_T4	KRZ68337.1_T10	KRZ04199.1_T11
2490	EFV51545_T1	KRZ57900.1_T2	KRY52844.1_T3	KRX42766.1_T5	KRX77830.1_T6	KRX20410.1_T7	KRZ91072.1_T8	KRX53937.1_T9	KRY10643.1_T12	TP03356_T4	KRZ68336.1_T10	KRZ04206.1_T11
2491	EFV51546_T1	KRZ57946.1_T2	KRY52872.1_T3	KRX42760.1_T5	KRX77780.1_T6	KRX20380.1_T7	KRZ91051.1_T8	KRX53953.1_T9	KRY10639.1_T12	TP03358_T4	KRZ68348.1_T10	KRZ04200.1_T11
2492	EFV51557_T1	KRZ51573.1_T2	KRY51684.1_T3	KRX50991.1_T5	KRX59409.1_T6	KRX14379.1_T7	KRZ84306.1_T8	KRX59292.1_T9	KRY21727.1_T12	TP05926_T4	KRZ69212.1_T10	KRZ05694.1_T11
2493	EFV51562_T1	KRZ49819.1_T2	KRY51700.1_T3	KRX48611.1_T5	KRX83133.1_T6	KRX14377.1_T7	KRZ84288.1_T8	KRX59297.1_T9	KRY21649.1_T12	TP08784_T4	KRZ73391.1_T10	KRZ03419.1_T11
2494	EFV51565_T1	KRZ49183.1_T2	KRY47976.1_T3	KRX36734.1_T5	KRX70400.1_T6	KRX20443.1_T7	KRZ84285.1_T8	KRX59270.1_T9	KRY21684.1_T12	TP08786_T4	KRZ73375.1_T10	KRZ03413.1_T11
2495	EFV51569_T1	KRZ49188.1_T2	KRY47961.1_T3	KRX36739.1_T5	KRX70393.1_T6	KRX20478.1_T7	KRZ84282.1_T8	KRX59265.1_T9	KRY21749.1_T12	TP08791_T4	KRZ73419.1_T10	KRZ03387.1_T11
2496	EFV51591_T1	KRZ57959.1_T2	KRY51711.1_T3	KRX48590.1_T5	KRX69893.1_T6	KRX17415.1_T7	KRZ88845.1_T8	KRX64490.1_T9	KRY12528.1_T12	TP08772_T4	KRZ73403.1_T10	KRZ09248.1_T11
2497	EFV51593_T1	KRZ49824.1_T2	KRY47960.1_T3	KRX42755.1_T5	KRX69892.1_T6	KRX17410.1_T7	KRZ88820.1_T8	KRX52324.1_T9	KRY12526.1_T12	TP08776_T4	KRZ73426.1_T10	KRZ09283.1_T11
2498	EFV51594_T1	KRZ49810.1_T2	KRY47971.1_T3	KRX42771.1_T5	KRX69884.1_T6	KRX17449.1_T7	KRZ88837.1_T8	KRX52321.1_T9	KRY12504.1_T12	TP08777_T4	KRZ73358.1_T10	KRZ09275.1_T11
2499	EFV51596_T1	KRZ49831.1_T2	KRY47973.1_T3	KRX42768.1_T5	KRX69891.1_T6	KRX17411.1_T7	KRZ88818.1_T8	KRX52310.1_T9	KRY12512.1_T12	TP08778_T4	KRZ73422.1_T10	KRZ09281.1_T11
2500	EFV51599_T1	KRZ49827.1_T2	KRY47959.1_T3	KRX42769.1_T5	KRX69882.1_T6	KRX17420.1_T7	KRZ88800.1_T8	KRX52315.1_T9	KRY12491.1_T12	TP08779_T4	KRZ73413.1_T10	KRZ09258.1_T11
2501	EFV51613_T1	KRZ55686.1_T2	KRY50882.1_T3	KRX48613.1_T5	KRX76001.1_T6	KRX16236.1_T7	KRZ86253.1_T8	KRX55748.1_T9	KRY15127.1_T12	TP08737_T4	KRZ70176.1_T10	KRZ10643.1_T11
2502	EFV51615_T1	KRZ55672.1_T2	KRY50852.1_T3	KRX48587.1_T5	KRX76003.1_T6	KRX16245.1_T7	KRZ86286.1_T8	KRX55768.1_T9	KRY15154.1_T12	TP08738_T4	KRZ70139.1_T10	KRZ10729.1_T11
2503	EFV51617_T1	KRZ55684.1_T2	KRY50851.1_T3	KRX48596.1_T5	KRX75973.1_T6	KRX16247.1_T7	KRZ86275.1_T8	KRX55752.1_T9	KRY15122.1_T12	TP08739_T4	KRZ70171.1_T10	KRZ10719.1_T11
2504	EFV51618_T1	KRZ55651.1_T2	KRY50854.1_T3	KRX48591.1_T5	KRX75978.1_T6	KRX16220.1_T7	KRZ86256.1_T8	KRX55749.1_T9	KRY15159.1_T12	TP08741_T4	KRZ70160.1_T10	KRZ10695.1_T11
2505	EFV51621_T1	KRZ55674.1_T2	KRY50885.1_T3	KRX48607.1_T5	KRX75991.1_T6	KRX16240.1_T7	KRZ86255.1_T8	KRX55762.1_T9	KRY15144.1_T12	TP08744_T4	KRZ70148.1_T10	KRZ10713.1_T11
2506	EFV51623_T1	KRZ55670.1_T2	KRY50866.1_T3	KRX48558.1_T5	KRX75975.1_T6	KRX16234.1_T7	KRZ86271.1_T8	KRX55755.1_T9	KRY15133.1_T12	TP08746_T4	KRZ70155.1_T10	KRZ10673.1_T11
2507	EFV51624_T1	KRZ55666.1_T2	KRY50871.1_T3	KRX48579.1_T5	KRX75994.1_T6	KRX16246.1_T7	KRZ86252.1_T8	KRX55751.1_T9	KRY15124.1_T12	TP08747_T4	KRZ70172.1_T10	KRZ10681.1_T11
2508	EFV51625_T1	KRZ55660.1_T2	KRY50880.1_T3	KRX48609.1_T5	KRX75986.1_T6	KRX16233.1_T7	KRZ86293.1_T8	KRX55761.1_T9	KRY15140.1_T12	TP08748_T4	KRZ70143.1_T10	KRZ10679.1_T11
2509	EFV51627_T1	KRZ55675.1_T2	KRY50872.1_T3	KRX48582.1_T5	KRX75998.1_T6	KRX16228.1_T7	KRZ86260.1_T8	KRX55758.1_T9	KRY15158.1_T12	TP08751_T4	KRZ70154.1_T10	KRZ10715.1_T11
2510	EFV51629_T1	KRZ55664.1_T2	KRY50861.1_T3	KRX48557.1_T5	KRX75996.1_T6	KRX16250.1_T7	KRZ86268.1_T8	KRX55740.1_T9	KRY15148.1_T12	TP08753_T4	KRZ70145.1_T10	KRZ10628.1_T11
2511	EFV51630_T1	KRZ55661.1_T2	KRY50878.1_T3	KRX48584.1_T5	KRX75988.1_T6	KRX16225.1_T7	KRZ86287.1_T8	KRX55741.1_T9	KRY15156.1_T12	TP08754_T4	KRZ70157.1_T10	KRZ10702.1_T11
2512	EFV51633_T1	KRZ55680.1_T2	KRY50874.1_T3	KRX48554.1_T5	KRX75984.1_T6	KRX16226.1_T7	KRZ86278.1_T8	KRX55750.1_T9	KRY15152.1_T12	TP08757_T4	KRZ70164.1_T10	KRZ10685.1_T11
2513	EFV51634_T1	KRZ55677.1_T2	KRY50859.1_T3	KRX48563.1_T5	KRX76009.1_T6	KRX16248.1_T7	KRZ86289.1_T8	KRX55767.1_T9	KRY15141.1_T12	TP08758_T4	KRZ70175.1_T10	KRZ10635.1_T11
2514	EFV51636_T1	KRZ55659.1_T2	KRY50848.1_T3	KRX48570.1_T5	KRX75979.1_T6	KRX16237.1_T7	KRZ86269.1_T8	KRX55765.1_T9	KRY15131.1_T12	TP08759_T4	KRZ70165.1_T10	KRZ10656.1_T11
2515	EFV51665_T1	KRZ55494.1_T2	KRY55085.1_T3	KRX39767.1_T5	KRX76453.1_T6	KRX18786.1_T7	KRZ97383.1_T8	KRX56125.1_T9	KRY11840.1_T12	TP12664_T4	KRZ73293.1_T10	KRZ02852.1_T11
2516	EFV51666_T1	KRZ55478.1_T2	KRY55076.1_T3	KRX39776.1_T5	KRX76460.1_T6	KRX18743.1_T7	KRZ97390.1_T8	KRX56124.1_T9	KRY11858.1_T12	TP12665_T4	KRZ73311.1_T10	KRZ02860.1_T11
2517	EFV51669_T1	KRZ55469.1_T2	KRY55078.1_T3	KRX39757.1_T5	KRX76486.1_T6	KRX18771.1_T7	KRZ97418.1_T8	KRX56107.1_T9	KRY11838.1_T12	TP12667_T4	KRZ73336.1_T10	KRZ02857.1_T11
2518	EFV51671_T1	KRZ55451.1_T2	KRY55109.1_T3	KRX39765.1_T5	KRX76450.1_T6	KRX18810.1_T7	KRZ97372.1_T8	KRX56132.1_T9	KRY11835.1_T12	TP12670_T4	KRZ73310.1_T10	KRZ13481.1_T11
2522	EFV51696_T1	KRZ58975.1_T2	KRY46986.1_T3	KRX48573.1_T5	KRX74964.1_T6	KRX17438.1_T7	KRZ88840.1_T8	KRX64521.1_T9	KRY10018.1_T12	TP06672_T4	KRZ73292.1_T10	KRZ13513.1_T11
2523	EFV51697_T1	KRZ58958.1_T2	KRY46987.1_T3	KRX48594.1_T5	KRX74962.1_T6	KRX17423.1_T7	KRZ88806.1_T8	KRX64447.1_T9	KRY10024.1_T12	TP06670_T4	KRZ73282.1_T10	KRZ13446.1_T11
2524	EFV51720_T1	KRZ57950.1_T2	KRY51701.1_T3	KRX38220.1_T5	KRX74945.1_T6	KRX15136.1_T7	KRZ84325.1_T8	KRX54172.1_T9	KRY10953.1_T12	TP06687_T4	KRZ68232.1_T10	KRZ13439.1_T11
2525	EFV51721_T1	KRZ57957.1_T2	KRY51729.1_T3	KRX38223.1_T5	KRX74926.1_T6	KRX15158.1_T7	KRZ84328.1_T8	KRX54189.1_T9	KRY10963.1_T12	TP06686_T4	KRZ68233.1_T10	KRZ13442.1_T11
2526	EFV51736_T1	KRZ48430.1_T2	KRY51694.1_T3	KRX35010.1_T5	KRX69644.1_T6	KRX15164.1_T7	KRZ84320.1_T8	KRX54185.1_T9	KRY10952.1_T12	TP06694_T4	KRZ68234.1_T10	KRZ13501.1_T11
2527	EFV51737_T1	KRZ57948.1_T2	KRY51683.1_T3	KRX38207.1_T5	KRX69642.1_T6	KRX15163.1_T7	KRZ84318.1_T8	KRX54191.1_T9	KRY10965.1_T12	TP06693_T4	KRZ68229.1_T10	KRZ13445.1_T11
2528	EFV51743_T1	KRZ49939.1_T2	KRY46775.1_T3	KRX37830.1_T5	KRX83439.1_T6	KRX13665.1_T7	KRZ83600.1_T8	KRX53136.1_T9	KRY10508.1_T12	TP03109_T4	KRZ66758.1_T10	KRZ04143.1_T11
2529	EFV51744_T1	KRZ49935.1_T2	KRY46796.1_T3	KRX37837.1_T5	KRX83422.1_T6	KRX13663.1_T7	KRZ83615.1_T8	KRX53132.1_T9	KRY10531.1_T12	TP03108_T4	KRZ66759.1_T10	KRZ04142.1_T11
2530	EFV51747_T1	KRZ49933.1_T2	KRY46776.1_T3	KRX37842.1_T5	KRX83476.1_T6	KRX13660.1_T7	KRZ83609.1_T8	KRX53149.1_T9	KRY10535.1_T12	TP03103_T4	KRZ66757.1_T10	KRZ04119.1_T11
2531	EFV51750_T1	KRZ49932.1_T2	KRY46772.1_T3	KRX37829.1_T5	KRX83529.1_T6	KRX13676.1_T7	KRZ83617.1_T8	KRX53125.1_T9	KRY10525.1_T12	TP03100_T4	KRZ66751.1_T10	KRZ04115.1_T11
2532	EFV51751_T1	KRZ49937.1_T2	KRY46774.1_T3	KRX37827.1_T5	KRX83515.1_T6	KRX13662.1_T7	KRZ83613.1_T8	KRX53133.1_T9	KRY10511.1_T12	TP03099_T4	KRZ66753.1_T10	KRZ04118.1_T11
2533	EFV51754_T1	KRZ49929.1_T2	KRY46794.1_T3	KRX37838.1_T5	KRX83503.1_T6	KRX13667.1_T7	KRZ83603.1_T8	KRX53128.1_T9	KRY10521.1_T12	TP03096_T4	KRZ66760.1_T10	KRZ04135.1_T11
2534	EFV51763_T1	KRZ59582.1_T2	KRY46804.1_T3	KRX44451.1_T5	KRX70640.1_T6	KRX24289.1_T7	KRZ87469.1_T8	KRX64474.1_T9	KRY09653.1_T12	TP06733_T4	KRZ68970.1_T10	KRZ07833.1_T11
2535	EFV51771_T1	KRZ49250.1_T2	KRY51195.1_T3	KRX40986.1_T5	KRX77787.1_T6	KRX26256.1_T7	KRZ89604.1_T8	KRX55101.1_T9	KRY11546.1_T12	TP06724_T4	KRZ73384.1_T10	KRZ07792.1_T11
2536	EFV51775_T1	KRZ49252.1_T2	KRY51196.1_T3	KRX40987.1_T5	KRX77775.1_T6	KRX26241.1_T7	KRZ89636.1_T8	KRX55117.1_T9	KRY11539.1_T12	TP06721_T4	KRZ73393.1_T10	KRZ07802.1_T11
2537	EFV51776_T1	KRZ50402.1_T2	KRY51191.1_T3	KRX40996.1_T5	KRX77794.1_T6	KRX26244.1_T7	KRZ89586.1_T8	KRX55122.1_T9	KRY11536.1_T12	TP06718_T4	KRZ73360.1_T10	KRZ07822.1_T11
2538	EFV51777_T1	KRZ50405.1_T2	KRY51220.1_T3	KRX40995.1_T5	KRX77809.1_T6	KRX26311.1_T7	KRZ89610.1_T8	KRX55119.1_T9	KRY11543.1_T12	TP06716_T4	KRZ73407.1_T10	KRZ07832.1_T11
2539	EFV51783_T1	KRZ50406.1_T2	KRY51183.1_T3	KRX40991.1_T5	KRX77778.1_T6	KRX26315.1_T7	KRZ89623.1_T8	KRX55111.1_T9	KRY11547.1_T12	TP06708_T4	KRZ73387.1_T10	KRZ02497.1_T11
2540	EFV51784_T1	KRZ50408.1_T2	KRY51226.1_T3	KRX41006.1_T5	KRX77791.1_T6	KRX26198.1_T7	KRZ89647.1_T8	KRX55104.1_T9	KRY11540.1_T12	TP06707_T4	KRZ73369.1_T10	KRZ02495.1_T11
2541	EFV51785_T1	KRZ50415.1_T2	KRY51209.1_T3	KRX40992.1_T5	KRX77801.1_T6	KRX26208.1_T7	KRZ89608.1_T8	KRX55100.1_T9	KRY11537.1_T12	TP06706_T4	KRZ73354.1_T10	KRZ02496.1_T11
2542	EFV51786_T1	KRZ50414.1_T2	KRY51188.1_T3	KRX40983.1_T5	KRX77835.1_T6	KRX26364.1_T7	KRZ89582.1_T8	KRX55127.1_T9	KRY11531.1_T12	TP06705_T4	KRZ73356.1_T10	KRZ02503.1_T11
2544	EFV51808_T1	KRZ60100.1_T2	KRY52217.1_T3	KRX44912.1_T5	KRX75814.1_T6	KRX26300.1_T7	KRZ91077.1_T8	KRX56499.1_T9	KRY15504.1_T12	TP03082_T4	KRZ78840.1_T10	KRZ06772.1_T11
2545	EFV51809_T1	KRZ60058.1_T2	KRY52227.1_T3	KRX44916.1_T5	KRX75821.1_T6	KRX26184.1_T7	KRZ91124.1_T8	KRX56474.1_T9	KRY15495.1_T12	TP03085_T4	KRZ78832.1_T10	KRZ06761.1_T11
2546	EFV51810_T1	KRZ60088.1_T2	KRY52205.1_T3	KRX44931.1_T5	KRX75809.1_T6	KRX26278.1_T7	KRZ91086.1_T8	KRX56469.1_T9	KRY15510.1_T12	TP03086_T4	KRZ78783.1_T10	KRZ06779.1_T11
2547	EFV51821_T1	KRZ60079.1_T2	KRY52208.1_T3	KRX44917.1_T5	KRX75818.1_T6	KRX26159.1_T7	KRZ91132.1_T8	KRX56473.1_T9	KRY15494.1_T12	TP06654_T4	KRZ78763.1_T10	KRZ06744.1_T11
2549	EFV51839_T1	KRZ60060.1_T2	KRY49413.1_T3	KRX42550.1_T5	KRX74159.1_T6	KRX15230.1_T7	KRZ97512.1_T8	KRX57311.1_T9	KRY16201.1_T12	TP02210_T4	KRZ72441.1_T10	KRZ08920.1_T11
2550	EFV51841_T1	KRZ60069.1_T2	KRY49407.1_T3	KRX42567.1_T5	KRX74172.1_T6	KRX15236.1_T7	KRZ97380.1_T8	KRX57325.1_T9	KRY16219.1_T12	TP02213_T4	KRZ72475.1_T10	KRZ08957.1_T11
2551	EFV51842_T1	KRZ60105.1_T2	KRY49397.1_T3	KRX42554.1_T5	KRX74157.1_T6	KRX15227.1_T7	KRZ97538.1_T8	KRX57340.1_T9	KRY16186.1_T12	TP02214_T4	KRZ72497.1_T10	KRZ08924.1_T11
2552	EFV51845_T1	KRZ60081.1_T2	KRY49410.1_T3	KRX42568.1_T5	KRX74156.1_T6	KRX15235.1_T7	KRZ97369.1_T8	KRX57328.1_T9	KRY16198.1_T12	TP02216_T4	KRZ72447.1_T10	KRZ08939.1_T11
2553	EFV51849_T1	KRZ60071.1_T2	KRY49403.1_T3	KRX42565.1_T5	KRX74152.1_T6	KRX15222.1_T7	KRZ97519.1_T8	KRX57330.1_T9	KRY16203.1_T12	TP02218_T4	KRZ72454.1_T10	KRZ08916.1_T11
2554	EFV51852_T1	KRZ60107.1_T2	KRY49411.1_T3	KRX42551.1_T5	KRX74171.1_T6	KRX15224.1_T7	KRZ97467.1_T8	KRX57315.1_T9	KRY16212.1_T12	TP02221_T4	KRZ72463.1_T10	KRZ08958.1_T11
2555	EFV51854_T1	KRZ60066.1_T2	KRY49396.1_T3	KRX42570.1_T5	KRX74160.1_T6	KRX15219.1_T7	KRZ97420.1_T8	KRX57322.1_T9	KRY16209.1_T12	TP02222_T4	KRZ72457.1_T10	KRZ08955.1_T11
2556	EFV51858_T1	KRZ49173.1_T2	KRY55749.1_T3	KRX41531.1_T5	KRX73069.1_T6	KRX14693.1_T7	KRZ82801.1_T8	KRX63036.1_T9	KRY16457.1_T12	TP08241_T4	KRZ69404.1_T10	KRZ05810.1_T11
2557	EFV51866_T1	KRZ57546.1_T2	KRY55715.1_T3	KRX37731.1_T5	KRX81900.1_T6	KRX23392.1_T7	KRZ83975.1_T8	KRX55965.1_T9	KRY16472.1_T12	TP08246_T4	KRZ69406.1_T10	KRZ05778.1_T11
2558	EFV51867_T1	KRZ57558.1_T2	KRY55772.1_T3	KRX37732.1_T5	KRX81857.1_T6	KRX23408.1_T7	KRZ83957.1_T8	KRX55964.1_T9	KRY16461.1_T12	TP06574_T4	KRZ69024.1_T10	KRZ16166.1_T11
2559	EFV51870_T1	KRZ57553.1_T2	KRY55724.1_T3	KRX37721.1_T5	KRX81929.1_T6	KRX23359.1_T7	KRZ83979.1_T8	KRX55953.1_T9	KRY16467.1_T12	TP08247_T4	KRZ69424.1_T10	KRZ05811.1_T11
2560	EFV51871_T1	KRZ57524.1_T2	KRY55705.1_T3	KRX37735.1_T5	KRX81918.1_T6	KRX23430.1_T7	KRZ83965.1_T8	KRX55960.1_T9	KRY16500.1_T12	TP08248_T4	KRZ69432.1_T10	KRZ05806.1_T11
2561	EFV51874_T1	KRZ57520.1_T2	KRY55768.1_T3	KRX37723.1_T5	KRX81878.1_T6	KRX23368.1_T7	KRZ83959.1_T8	KRX55975.1_T9	KRY16440.1_T12	TP08250_T4	KRZ69411.1_T10	KRZ05796.1_T11
2562	EFV51875_T1	KRZ57578.1_T2	KRY55760.1_T3	KRX37733.1_T5	KRX81890.1_T6	KRX23453.1_T7	KRZ83980.1_T8	KRX55956.1_T9	KRY16476.1_T12	TP08251_T4	KRZ69422.1_T10	KRZ05776.1_T11
2563	EFV51876_T1	KRZ57545.1_T2	KRY55729.1_T3	KRX37736.1_T5	KRX81898.1_T6	KRX23396.1_T7	KRZ83958.1_T8	KRX55967.1_T9	KRY16477.1_T12	TP08252_T4	KRZ69395.1_T10	KRZ05800.1_T11
2564	EFV51896_T1	KRZ49119.1_T2	KRY49388.1_T3	KRX37068.1_T5	KRX71178.1_T6	KRX13929.1_T7	KRZ86092.1_T8	KRX63406.1_T9	KRY12740.1_T12	TP08231_T4	KRZ75919.1_T10	KRZ02396.1_T11
2565	EFV51898_T1	KRZ49113.1_T2	KRY49372.1_T3	KRX37073.1_T5	KRX71155.1_T6	KRX13919.1_T7	KRZ86118.1_T8	KRX63434.1_T9	KRY12751.1_T12	TP08233_T4	KRZ75956.1_T10	KRZ02389.1_T11
2566	EFV51899_T1	KRZ49114.1_T2	KRY49374.1_T3	KRX37077.1_T5	KRX71177.1_T6	KRX13921.1_T7	KRZ86107.1_T8	KRX63432.1_T9	KRY12742.1_T12	TP08234_T4	KRZ75880.1_T10	KRZ02398.1_T11
2567	EFV51900_T1	KRZ49117.1_T2	KRY49393.1_T3	KRX37076.1_T5	KRX71175.1_T6	KRX13915.1_T7	KRZ86112.1_T8	KRX63460.1_T9	KRY12747.1_T12	TP08236_T4	KRZ75914.1_T10	KRZ02403.1_T11
2568	EFV51901_T1	KRZ49111.1_T2	KRY49394.1_T3	KRX37079.1_T5	KRX71158.1_T6	KRX13924.1_T7	KRZ86113.1_T8	KRX63448.1_T9	KRY12762.1_T12	TP08237_T4	KRZ75957.1_T10	KRZ02401.1_T11
2570	EFV51922_T1	KRZ58371.1_T2	KRY49370.1_T3	KRX39921.1_T5	KRX72902.1_T6	KRX17554.1_T7	KRZ86400.1_T8	KRX63429.1_T9	KRY17286.1_T12	TP09596_T4	KRZ73239.1_T10	KRZ03345.1_T11
2571	EFV51923_T1	KRZ58387.1_T2	KRY49367.1_T3	KRX39934.1_T5	KRX72899.1_T6	KRX17513.1_T7	KRZ86390.1_T8	KRX63461.1_T9	KRY17250.1_T12	TP09593_T4	KRZ73273.1_T10	KRZ03351.1_T11
2572	EFV51924_T1	KRZ58398.1_T2	KRY49378.1_T3	KRX39924.1_T5	KRX72891.1_T6	KRX17520.1_T7	KRZ86372.1_T8	KRX63457.1_T9	KRY17251.1_T12	TP09592_T4	KRZ73230.1_T10	KRZ03356.1_T11
2573	EFV51929_T1	KRZ58363.1_T2	KRY50752.1_T3	KRX43551.1_T5	KRX74847.1_T6	KRX17551.1_T7	KRZ86366.1_T8	KRX63481.1_T9	KRY17268.1_T12	TP09575_T4	KRZ73218.1_T10	KRZ08135.1_T11
2574	EFV51939_T1	KRZ58355.1_T2	KRY50737.1_T3	KRX43579.1_T5	KRX74871.1_T6	KRX17532.1_T7	KRZ86378.1_T8	KRX63394.1_T9	KRY17254.1_T12	TP09571_T4	KRZ73233.1_T10	KRZ08150.1_T11
2575	EFV51941_T1	KRZ58360.1_T2	KRY50755.1_T3	KRX43568.1_T5	KRX74860.1_T6	KRX17546.1_T7	KRZ86381.1_T8	KRX63403.1_T9	KRY17257.1_T12	TP09569_T4	KRZ73251.1_T10	KRZ08153.1_T11
2576	EFV51949_T1	KRZ58390.1_T2	KRY49381.1_T3	KRX39937.1_T5	KRX72886.1_T6	KRX17548.1_T7	KRZ86387.1_T8	KRX63386.1_T9	KRY17253.1_T12	TP09600_T4	KRZ73256.1_T10	KRZ03361.1_T11
2577	EFV51952_T1	KRZ58374.1_T2	KRY49371.1_T3	KRX39942.1_T5	KRX72896.1_T6	KRX17525.1_T7	KRZ86388.1_T8	KRX63391.1_T9	KRY17267.1_T12	TP09598_T4	KRZ73216.1_T10	KRZ03370.1_T11
2578	EFV51954_T1	KRZ57562.1_T2	KRY55719.1_T3	KRX36776.1_T5	KRX73044.1_T6	KRX25361.1_T7	KRZ90190.1_T8	KRX55949.1_T9	KRY15048.1_T12	TP08269_T4	KRZ76507.1_T10	KRZ13452.1_T11
2579	EFV51958_T1	KRZ57575.1_T2	KRY55753.1_T3	KRX36783.1_T5	KRX73070.1_T6	KRX25421.1_T7	KRZ90224.1_T8	KRX55968.1_T9	KRY15057.1_T12	TP08273_T4	KRZ76512.1_T10	KRZ13498.1_T11
2580	EFV51961_T1	KRZ57543.1_T2	KRY55748.1_T3	KRX35218.1_T5	KRX81915.1_T6	KRX12948.1_T7	KRZ90229.1_T8	KRX55959.1_T9	KRY08086.1_T12	TP08276_T4	KRZ68944.1_T10	KRZ13509.1_T11
2581	EFV51962_T1	KRZ57532.1_T2	KRY55712.1_T3	KRX35214.1_T5	KRX81923.1_T6	KRX12946.1_T7	KRZ90217.1_T8	KRX55970.1_T9	KRY08089.1_T12	TP08277_T4	KRZ68964.1_T10	KRZ13499.1_T11
2582	EFV51977_T1	KRZ54518.1_T2	KRY46013.1_T3	KRX50542.1_T5	KRX77855.1_T6	KRX16794.1_T7	KRZ82727.1_T8	KRX52082.1_T9	KRY14233.1_T12	TP03486_T4	KRZ72220.1_T10	KRZ02172.1_T11
2583	EFV51980_T1	KRZ54534.1_T2	KRY46021.1_T3	KRX50514.1_T5	KRX77860.1_T6	KRX16799.1_T7	KRZ82730.1_T8	KRX52080.1_T9	KRY14209.1_T12	TP03489_T4	KRZ72214.1_T10	KRZ02176.1_T11
2584	EFV51982_T1	KRZ54530.1_T2	KRY46015.1_T3	KRX50575.1_T5	KRX77854.1_T6	KRX16809.1_T7	KRZ82733.1_T8	KRX59046.1_T9	KRY14227.1_T12	TP03491_T4	KRZ72222.1_T10	KRZ02166.1_T11
2587	EFV52012_T1	KRZ59222.1_T2	KRY55450.1_T3	KRX50563.1_T5	KRX79142.1_T6	KRX20519.1_T7	KRZ89236.1_T8	KRX66522.1_T9	KRY17862.1_T12	TP03472_T4	KRZ78818.1_T10	KRZ10312.1_T11
2588	EFV52013_T1	KRZ59224.1_T2	KRY55424.1_T3	KRX50512.1_T5	KRX79123.1_T6	KRX20503.1_T7	KRZ89214.1_T8	KRX66635.1_T9	KRY17842.1_T12	TP03473_T4	KRZ78769.1_T10	KRZ10347.1_T11
2589	EFV52014_T1	KRZ59214.1_T2	KRY55437.1_T3	KRX50519.1_T5	KRX79140.1_T6	KRX20520.1_T7	KRZ89211.1_T8	KRX66531.1_T9	KRY17835.1_T12	TP03474_T4	KRZ78768.1_T10	KRZ10338.1_T11
2590	EFV52016_T1	KRZ59217.1_T2	KRY55445.1_T3	KRX50533.1_T5	KRX79134.1_T6	KRX20533.1_T7	KRZ89220.1_T8	KRX66610.1_T9	KRY17850.1_T12	TP04088_T4	KRZ78751.1_T10	KRZ10327.1_T11
2591	EFV52019_T1	KRZ59234.1_T2	KRY55417.1_T3	KRX50603.1_T5	KRX79125.1_T6	KRX20510.1_T7	KRZ89230.1_T8	KRX66644.1_T9	KRY17839.1_T12	TP04091_T4	KRZ78766.1_T10	KRZ10311.1_T11
2592	EFV52028_T1	KRZ59219.1_T2	KRY55454.1_T3	KRX50580.1_T5	KRX79147.1_T6	KRX20507.1_T7	KRZ89213.1_T8	KRX66557.1_T9	KRY17856.1_T12	TP03464_T4	KRZ78799.1_T10	KRZ10342.1_T11
2593	EFV52030_T1	KRZ59206.1_T2	KRY55428.1_T3	KRX50557.1_T5	KRX79150.1_T6	KRX20531.1_T7	KRZ89234.1_T8	KRX66603.1_T9	KRY17846.1_T12	TP03465_T4	KRZ78733.1_T10	KRZ10324.1_T11
2594	EFV52038_T1	KRZ53873.1_T2	KRY50089.1_T3	KRX42857.1_T5	KRX77448.1_T6	KRX18536.1_T7	KRZ85591.1_T8	KRX55797.1_T9	KRY22657.1_T12	TP01252_T4	KRZ68753.1_T10	KRZ04894.1_T11
2595	EFV52047_T1	KRZ53878.1_T2	KRY50105.1_T3	KRX42849.1_T5	KRX77476.1_T6	KRX18561.1_T7	KRZ85603.1_T8	KRX55788.1_T9	KRY10922.1_T12	TP01249_T4	KRZ68754.1_T10	KRZ04889.1_T11
2596	EFV52048_T1	KRZ53875.1_T2	KRY50106.1_T3	KRX42846.1_T5	KRX77437.1_T6	KRX18580.1_T7	KRZ85605.1_T8	KRX55784.1_T9	KRY10920.1_T12	TP01247_T4	KRZ68751.1_T10	KRZ04909.1_T11
2597	EFV52049_T1	KRZ53867.1_T2	KRY50101.1_T3	KRX42840.1_T5	KRX77469.1_T6	KRX18545.1_T7	KRZ85598.1_T8	KRX55781.1_T9	KRY10927.1_T12	TP01246_T4	KRZ68760.1_T10	KRZ04890.1_T11
2598	EFV52052_T1	KRZ53872.1_T2	KRY50100.1_T3	KRX42858.1_T5	KRX77455.1_T6	KRX18572.1_T7	KRZ85594.1_T8	KRX55773.1_T9	KRY10926.1_T12	TP01243_T4	KRZ68765.1_T10	KRZ04901.1_T11
2599	EFV52067_T1	KRZ52616.1_T2	KRY48798.1_T3	KRX40218.1_T5	KRX72925.1_T6	KRX20490.1_T7	KRZ87345.1_T8	KRX60246.1_T9	KRY15191.1_T12	TP02880_T4	KRZ72390.1_T10	KRZ03804.1_T11
2600	EFV52069_T1	KRZ52596.1_T2	KRY48807.1_T3	KRX40228.1_T5	KRX72926.1_T6	KRX20536.1_T7	KRZ87300.1_T8	KRX60238.1_T9	KRY15200.1_T12	TP02883_T4	KRZ72388.1_T10	KRZ03807.1_T11
2601	EFV52075_T1	KRZ51019.1_T2	KRY47664.1_T3	KRX38705.1_T5	KRX77472.1_T6	KRX24387.1_T7	KRZ84239.1_T8	KRX56588.1_T9	KRY11089.1_T12	TP03625_T4	KRZ67249.1_T10	KRZ03190.1_T11
2602	EFV52077_T1	KRZ51029.1_T2	KRY47668.1_T3	KRX38723.1_T5	KRX77443.1_T6	KRX24322.1_T7	KRZ84257.1_T8	KRX56575.1_T9	KRY11090.1_T12	TP03627_T4	KRZ67240.1_T10	KRZ03185.1_T11
2603	EFV52078_T1	KRZ51037.1_T2	KRY47658.1_T3	KRX38718.1_T5	KRX77464.1_T6	KRX24358.1_T7	KRZ84245.1_T8	KRX56601.1_T9	KRY11085.1_T12	TP03628_T4	KRZ67237.1_T10	KRZ03187.1_T11
2604	EFV52079_T1	KRZ51027.1_T2	KRY47670.1_T3	KRX38707.1_T5	KRX77440.1_T6	KRX24360.1_T7	KRZ84247.1_T8	KRX56595.1_T9	KRY11076.1_T12	TP03629_T4	KRZ67251.1_T10	KRZ03191.1_T11
2605	EFV52081_T1	KRZ51034.1_T2	KRY47647.1_T3	KRX38724.1_T5	KRX77460.1_T6	KRX24316.1_T7	KRZ84244.1_T8	KRX56552.1_T9	KRY11092.1_T12	TP03630_T4	KRZ67244.1_T10	KRZ03186.1_T11
2606	EFV52082_T1	KRZ51047.1_T2	KRY47652.1_T3	KRX38725.1_T5	KRX77456.1_T6	KRX24396.1_T7	KRZ84241.1_T8	KRX56579.1_T9	KRY11084.1_T12	TP03631_T4	KRZ67235.1_T10	KRZ03184.1_T11
2607	EFV52088_T1	KRZ51045.1_T2	KRY47653.1_T3	KRX38714.1_T5	KRX77446.1_T6	KRX24335.1_T7	KRZ84248.1_T8	KRX56590.1_T9	KRY11098.1_T12	TP03636_T4	KRZ67246.1_T10	KRZ03192.1_T11
2608	EFV52090_T1	KRZ51026.1_T2	KRY47660.1_T3	KRX38703.1_T5	KRX77441.1_T6	KRX24341.1_T7	KRZ84235.1_T8	KRX56570.1_T9	KRY11096.1_T12	TP03638_T4	KRZ67242.1_T10	KRZ03180.1_T11
2609	EFV52093_T1	KRZ51042.1_T2	KRY47650.1_T3	KRX38704.1_T5	KRX77463.1_T6	KRX24293.1_T7	KRZ84254.1_T8	KRX56568.1_T9	KRY11080.1_T12	TP03640_T4	KRZ67253.1_T10	KRZ03194.1_T11
2610	EFV52094_T1	KRZ51041.1_T2	KRY47665.1_T3	KRX38720.1_T5	KRX77452.1_T6	KRX24385.1_T7	KRZ84261.1_T8	KRX56603.1_T9	KRY11094.1_T12	TP03641_T4	KRZ67233.1_T10	KRZ03182.1_T11
2611	EFV52102_T1	KRZ53907.1_T2	KRY50773.1_T3	KRX48635.1_T5	KRX78195.1_T6	KRX18553.1_T7	KRZ86645.1_T8	KRX56655.1_T9	KRY15184.1_T12	TP08442_T4	KRZ68466.1_T10	KRZ04791.1_T11
2612	EFV52103_T1	KRZ53896.1_T2	KRY50778.1_T3	KRX48643.1_T5	KRX78178.1_T6	KRX18567.1_T7	KRZ86631.1_T8	KRX56672.1_T9	KRY15170.1_T12	TP08441_T4	KRZ68476.1_T10	KRZ04800.1_T11
2613	EFV52104_T1	KRZ53893.1_T2	KRY50788.1_T3	KRX48682.1_T5	KRX78220.1_T6	KRX18546.1_T7	KRZ86658.1_T8	KRX56662.1_T9	KRY15169.1_T12	TP08440_T4	KRZ68473.1_T10	KRZ04798.1_T11
2614	EFV52105_T1	KRZ53884.1_T2	KRY50769.1_T3	KRX48661.1_T5	KRX78222.1_T6	KRX18550.1_T7	KRZ86675.1_T8	KRX56663.1_T9	KRY15199.1_T12	TP08439_T4	KRZ68479.1_T10	KRZ04815.1_T11
2615	EFV52106_T1	KRZ53903.1_T2	KRY50782.1_T3	KRX48622.1_T5	KRX78174.1_T6	KRX18576.1_T7	KRZ86669.1_T8	KRX56684.1_T9	KRY15190.1_T12	TP08438_T4	KRZ68477.1_T10	KRZ04812.1_T11
2616	EFV52109_T1	KRZ53910.1_T2	KRY50795.1_T3	KRX48655.1_T5	KRX78211.1_T6	KRX18560.1_T7	KRZ86636.1_T8	KRX56666.1_T9	KRY09899.1_T12	TP08445_T4	KRZ68485.1_T10	KRZ04795.1_T11
2617	EFV52111_T1	KRZ53904.1_T2	KRY50796.1_T3	KRX48638.1_T5	KRX78210.1_T6	KRX18541.1_T7	KRZ86676.1_T8	KRX56657.1_T9	KRY15178.1_T12	TP08443_T4	KRZ68483.1_T10	KRZ04805.1_T11
2618	EFV52112_T1	KRZ53916.1_T2	KRY50770.1_T3	KRX48650.1_T5	KRX78193.1_T6	KRX18548.1_T7	KRZ86627.1_T8	KRX56682.1_T9	KRY09886.1_T12	TP08450_T4	KRZ68458.1_T10	KRZ04803.1_T11
2619	EFV52113_T1	KRZ53913.1_T2	KRY50759.1_T3	KRX48674.1_T5	KRX78216.1_T6	KRX18569.1_T7	KRZ86643.1_T8	KRX56668.1_T9	KRY09898.1_T12	TP08449_T4	KRZ68460.1_T10	KRZ04809.1_T11
2620	EFV52121_T1	KRZ53899.1_T2	KRY50785.1_T3	KRX48663.1_T5	KRX78199.1_T6	KRX18542.1_T7	KRZ86653.1_T8	KRX56688.1_T9	KRY09891.1_T12	TP08455_T4	KRZ68474.1_T10	KRZ04799.1_T11
2621	EFV52122_T1	KRZ53890.1_T2	KRY50790.1_T3	KRX48633.1_T5	KRX78198.1_T6	KRX18556.1_T7	KRZ86671.1_T8	KRX56683.1_T9	KRY09888.1_T12	TP08453_T4	KRZ68471.1_T10	KRZ04792.1_T11
2622	EFV52155_T1	KRZ58905.1_T2	KRY49705.1_T3	KRX48680.1_T5	KRX75527.1_T6	KRX22070.1_T7	KRZ89286.1_T8	KRX66615.1_T9	KRY19501.1_T12	TP04133_T4	KRZ66796.1_T10	KRZ06823.1_T11
2623	EFV52157_T1	KRZ58924.1_T2	KRY49700.1_T3	KRX48651.1_T5	KRX75525.1_T6	KRX22085.1_T7	KRZ89282.1_T8	KRX66642.1_T9	KRY19485.1_T12	TP04134_T4	KRZ66784.1_T10	KRZ06825.1_T11
2624	EFV52158_T1	KRZ58920.1_T2	KRY49693.1_T3	KRX48637.1_T5	KRX75519.1_T6	KRX22078.1_T7	KRZ89245.1_T8	KRX66633.1_T9	KRY19439.1_T12	TP04135_T4	KRZ66792.1_T10	KRZ06810.1_T11
2625	EFV52161_T1	KRZ58909.1_T2	KRY49712.1_T3	KRX48660.1_T5	KRX75532.1_T6	KRX22107.1_T7	KRZ89274.1_T8	KRX66595.1_T9	KRY19492.1_T12	TP08499_T4	KRZ71468.1_T10	KRZ02925.1_T11
2626	EFV52164_T1	KRZ58912.1_T2	KRY49698.1_T3	KRX48666.1_T5	KRX75543.1_T6	KRX22149.1_T7	KRZ89250.1_T8	KRX66521.1_T9	KRY19479.1_T12	TP08496_T4	KRZ71476.1_T10	KRZ02917.1_T11
2627	EFV52168_T1	KRZ58938.1_T2	KRY49708.1_T3	KRX48625.1_T5	KRX75547.1_T6	KRX22095.1_T7	KRZ89261.1_T8	KRX66626.1_T9	KRY19456.1_T12	TP08493_T4	KRZ71430.1_T10	KRZ02922.1_T11
2628	EFV52169_T1	KRZ58915.1_T2	KRY49702.1_T3	KRX48676.1_T5	KRX75526.1_T6	KRX22055.1_T7	KRZ89242.1_T8	KRX66548.1_T9	KRY19467.1_T12	TP08492_T4	KRZ71443.1_T10	KRZ02911.1_T11
2629	EFV52171_T1	KRZ58927.1_T2	KRY49689.1_T3	KRX48684.1_T5	KRX75539.1_T6	KRX22060.1_T7	KRZ89238.1_T8	KRX66547.1_T9	KRY19468.1_T12	TP08490_T4	KRZ71434.1_T10	KRZ02918.1_T11
2630	EFV52173_T1	KRZ58928.1_T2	KRY49728.1_T3	KRX48646.1_T5	KRX75556.1_T6	KRX22137.1_T7	KRZ89256.1_T8	KRX66573.1_T9	KRY19481.1_T12	TP08489_T4	KRZ71453.1_T10	KRZ02915.1_T11
2631	EFV52174_T1	KRZ58900.1_T2	KRY49696.1_T3	KRX48627.1_T5	KRX75537.1_T6	KRX22063.1_T7	KRZ89247.1_T8	KRX66613.1_T9	KRY19442.1_T12	TP08487_T4	KRZ71474.1_T10	KRZ02929.1_T11
2632	EFV52183_T1	KRZ49125.1_T2	KRY56848.1_T3	KRX35915.1_T5	KRX75560.1_T6	KRX22088.1_T7	KRZ84808.1_T8	KRX66627.1_T9	KRY19450.1_T12	TP04053_T4	KRZ66668.1_T10	KRZ08128.1_T11
2633	EFV52187_T1	KRZ49130.1_T2	KRY56869.1_T3	KRX35916.1_T5	KRX78354.1_T6	KRX22072.1_T7	KRZ93304.1_T8	KRX66618.1_T9	KRY19434.1_T12	TP04048_T4	KRZ66666.1_T10	KRZ09561.1_T11
2634	EFV52188_T1	KRZ49123.1_T2	KRY56865.1_T3	KRX35920.1_T5	KRX78315.1_T6	KRX22059.1_T7	KRZ93230.1_T8	KRX66647.1_T9	KRY19498.1_T12	TP04050_T4	KRZ66678.1_T10	KRZ09570.1_T11
2635	EFV52192_T1	KRZ49122.1_T2	KRY56892.1_T3	KRX35910.1_T5	KRX78353.1_T6	KRX22132.1_T7	KRZ93272.1_T8	KRX66555.1_T9	KRY19453.1_T12	TP04051_T4	KRZ66675.1_T10	KRZ09552.1_T11
2636	EFV52193_T1	KRZ49124.1_T2	KRY56832.1_T3	KRX35912.1_T5	KRX78322.1_T6	KRX22045.1_T7	KRZ93280.1_T8	KRX66607.1_T9	KRY19490.1_T12	TP04052_T4	KRZ66661.1_T10	KRZ09558.1_T11
2638	EFV52199_T1	KRZ55760.1_T2	KRY56871.1_T3	KRX50685.1_T5	KRX78345.1_T6	KRX22092.1_T7	KRZ93231.1_T8	KRX66638.1_T9	KRY19449.1_T12	TP04039_T4	KRZ73668.1_T10	KRZ09569.1_T11
2639	EFV52201_T1	KRZ55758.1_T2	KRY56845.1_T3	KRX50683.1_T5	KRX78339.1_T6	KRX22056.1_T7	KRZ93201.1_T8	KRX66533.1_T9	KRY19437.1_T12	TP04040_T4	KRZ73634.1_T10	KRZ09543.1_T11
2640	EFV52204_T1	KRZ55745.1_T2	KRY56842.1_T3	KRX50657.1_T5	KRX78329.1_T6	KRX22122.1_T7	KRZ93216.1_T8	KRX66599.1_T9	KRY19462.1_T12	TP04042_T4	KRZ73691.1_T10	KRZ09565.1_T11
2641	EFV52229_T1	KRZ53593.1_T2	KRY49510.1_T3	KRX37568.1_T5	KRX79427.1_T6	KRX20683.1_T7	KRZ85142.1_T8	KRX60714.1_T9	KRY12792.1_T12	TP04012_T4	KRZ68084.1_T10	KRZ10473.1_T11
2642	EFV52231_T1	KRZ53602.1_T2	KRY49486.1_T3	KRX37554.1_T5	KRX79445.1_T6	KRX20724.1_T7	KRZ85125.1_T8	KRX60676.1_T9	KRY12789.1_T12	TP04014_T4	KRZ68072.1_T10	KRZ10471.1_T11
2643	EFV52234_T1	KRZ53590.1_T2	KRY49474.1_T3	KRX37560.1_T5	KRX79456.1_T6	KRX20718.1_T7	KRZ85147.1_T8	KRX60693.1_T9	KRY12764.1_T12	TP04018_T4	KRZ68073.1_T10	KRZ10523.1_T11
2644	EFV52239_T1	KRZ53606.1_T2	KRY49480.1_T3	KRX38264.1_T5	KRX71104.1_T6	KRX20701.1_T7	KRZ85129.1_T8	KRX60666.1_T9	KRY12793.1_T12	TP04021_T4	KRZ68099.1_T10	KRZ10466.1_T11
2645	EFV52241_T1	KRZ53591.1_T2	KRY49503.1_T3	KRX38259.1_T5	KRX71091.1_T6	KRX20738.1_T7	KRZ85152.1_T8	KRX60646.1_T9	KRY12773.1_T12	TP04023_T4	KRZ68086.1_T10	KRZ10470.1_T11
2647	EFV52248_T1	KRZ57025.1_T2	KRY52651.1_T3	KRX45295.1_T5	KRX76637.1_T6	KRX19877.1_T7	KRZ91855.1_T8	KRX57074.1_T9	KRY22146.1_T12	TP03967_T4	KRZ78013.1_T10	KRZ15558.1_T11
2648	EFV52249_T1	KRZ57064.1_T2	KRY52636.1_T3	KRX45286.1_T5	KRX76640.1_T6	KRX19905.1_T7	KRZ91807.1_T8	KRX57069.1_T9	KRY22181.1_T12	TP03968_T4	KRZ77989.1_T10	KRZ15585.1_T11
2649	EFV52254_T1	KRZ57072.1_T2	KRY52643.1_T3	KRX45266.1_T5	KRX76657.1_T6	KRX19848.1_T7	KRZ91866.1_T8	KRX57087.1_T9	KRY22111.1_T12	TP03974_T4	KRZ77982.1_T10	KRZ15507.1_T11
2650	EFV52255_T1	KRZ57044.1_T2	KRY52659.1_T3	KRX45257.1_T5	KRX76674.1_T6	KRX19867.1_T7	KRZ91823.1_T8	KRX57080.1_T9	KRY22161.1_T12	TP03976_T4	KRZ78052.1_T10	KRZ15502.1_T11
2651	EFV52257_T1	KRZ57030.1_T2	KRY52633.1_T3	KRX45265.1_T5	KRX76656.1_T6	KRX19875.1_T7	KRZ91804.1_T8	KRX57076.1_T9	KRY22206.1_T12	TP03979_T4	KRZ78033.1_T10	KRZ15578.1_T11
2652	EFV52260_T1	KRZ57050.1_T2	KRY52623.1_T3	KRX45258.1_T5	KRX76681.1_T6	KRX19912.1_T7	KRZ91867.1_T8	KRX57081.1_T9	KRY22135.1_T12	TP03981_T4	KRZ78042.1_T10	KRZ15560.1_T11
2653	EFV52266_T1	KRZ57040.1_T2	KRY52626.1_T3	KRX45271.1_T5	KRX76644.1_T6	KRX19900.1_T7	KRZ91788.1_T8	KRX57050.1_T9	KRY22225.1_T12	TP03985_T4	KRZ78049.1_T10	KRZ15598.1_T11
2654	EFV52270_T1	KRZ57042.1_T2	KRY52660.1_T3	KRX45261.1_T5	KRX76649.1_T6	KRX19859.1_T7	KRZ91869.1_T8	KRX57078.1_T9	KRY22099.1_T12	TP03989_T4	KRZ77978.1_T10	KRZ15514.1_T11
2655	EFV52274_T1	KRZ57039.1_T2	KRY52628.1_T3	KRX45292.1_T5	KRX76654.1_T6	KRX19845.1_T7	KRZ91794.1_T8	KRX57054.1_T9	KRY22196.1_T12	TP03994_T4	KRZ77970.1_T10	KRZ07930.1_T11
2656	EFV52284_T1	KRZ55553.1_T2	KRY51254.1_T3	KRX45202.1_T5	KRX79397.1_T6	KRX15628.1_T7	KRZ93827.1_T8	KRX60688.1_T9	KRY14894.1_T12	TP07273_T4	KRZ78021.1_T10	KRZ15494.1_T11
2657	EFV52286_T1	KRZ55586.1_T2	KRY51266.1_T3	KRX45161.1_T5	KRX79395.1_T6	KRX15642.1_T7	KRZ93882.1_T8	KRX60667.1_T9	KRY14898.1_T12	TP07276_T4	KRZ78050.1_T10	KRZ15561.1_T11
2658	EFV52290_T1	KRZ55577.1_T2	KRY51251.1_T3	KRX45170.1_T5	KRX79384.1_T6	KRX15619.1_T7	KRZ93842.1_T8	KRX60699.1_T9	KRY14880.1_T12	TP07277_T4	KRZ77998.1_T10	KRZ15538.1_T11
2659	EFV52291_T1	KRZ55547.1_T2	KRY51247.1_T3	KRX45203.1_T5	KRX79423.1_T6	KRX15645.1_T7	KRZ93869.1_T8	KRX60710.1_T9	KRY14911.1_T12	TP07278_T4	KRZ78017.1_T10	KRZ15511.1_T11
2660	EFV52295_T1	KRZ55561.1_T2	KRY51260.1_T3	KRX45173.1_T5	KRX79393.1_T6	KRX15635.1_T7	KRZ93883.1_T8	KRX60656.1_T9	KRY14883.1_T12	TP07281_T4	KRZ77993.1_T10	KRZ15481.1_T11
2661	EFV52296_T1	KRZ55548.1_T2	KRY51242.1_T3	KRX45191.1_T5	KRX79380.1_T6	KRX15641.1_T7	KRZ93949.1_T8	KRX60657.1_T9	KRY14888.1_T12	TP07283_T4	KRZ78008.1_T10	KRZ15478.1_T11
2662	EFV52297_T1	KRZ55549.1_T2	KRY51235.1_T3	KRX45184.1_T5	KRX79414.1_T6	KRX15633.1_T7	KRZ93929.1_T8	KRX60690.1_T9	KRY14921.1_T12	TP07284_T4	KRZ77986.1_T10	KRZ15554.1_T11
2663	EFV52298_T1	KRZ55576.1_T2	KRY51262.1_T3	KRX45165.1_T5	KRX79466.1_T6	KRX15615.1_T7	KRZ93847.1_T8	KRX60679.1_T9	KRY14890.1_T12	TP07285_T4	KRZ77957.1_T10	KRZ15568.1_T11
2664	EFV52299_T1	KRZ55570.1_T2	KRY51244.1_T3	KRX45181.1_T5	KRX79461.1_T6	KRX15623.1_T7	KRZ93850.1_T8	KRX60709.1_T9	KRY14905.1_T12	TP07286_T4	KRZ78003.1_T10	KRZ15512.1_T11
2666	EFV52319_T1	KRZ58303.1_T2	KRY53888.1_T3	KRX46782.1_T5	KRX79321.1_T6	KRX23417.1_T7	KRZ93941.1_T8	KRX58277.1_T9	KRY16938.1_T12	TP07237_T4	KRZ78030.1_T10	KRZ08745.1_T11
2667	EFV52320_T1	KRZ58336.1_T2	KRY53895.1_T3	KRX46748.1_T5	KRX79323.1_T6	KRX23361.1_T7	KRZ93891.1_T8	KRX58286.1_T9	KRY16917.1_T12	TP07239_T4	KRZ78029.1_T10	KRZ08734.1_T11
2668	EFV52330_T1	KRZ58346.1_T2	KRY53899.1_T3	KRX46777.1_T5	KRX79347.1_T6	KRX23465.1_T7	KRZ93951.1_T8	KRX58284.1_T9	KRY16908.1_T12	TP07244_T4	KRZ77964.1_T10	KRZ08718.1_T11
2669	EFV52331_T1	KRZ58297.1_T2	KRY53891.1_T3	KRX46751.1_T5	KRX79343.1_T6	KRX23398.1_T7	KRZ93931.1_T8	KRX58288.1_T9	KRY16920.1_T12	TP07245_T4	KRZ78059.1_T10	KRZ08714.1_T11
2670	EFV52332_T1	KRZ58329.1_T2	KRY53896.1_T3	KRX46786.1_T5	KRX79337.1_T6	KRX23444.1_T7	KRZ93913.1_T8	KRX58241.1_T9	KRY16942.1_T12	TP07246_T4	KRZ78024.1_T10	KRZ08727.1_T11
2671	EFV52339_T1	KRZ58327.1_T2	KRY53867.1_T3	KRX46769.1_T5	KRX79319.1_T6	KRX23389.1_T7	KRZ93954.1_T8	KRX58283.1_T9	KRY16951.1_T12	TP07250_T4	KRZ77996.1_T10	KRZ08724.1_T11
2672	EFV52340_T1	KRZ58302.1_T2	KRY53904.1_T3	KRX46774.1_T5	KRX79341.1_T6	KRX23458.1_T7	KRZ93899.1_T8	KRX58271.1_T9	KRY16921.1_T12	TP07251_T4	KRZ78060.1_T10	KRZ08735.1_T11
2674	EFV52360_T1	KRZ58314.1_T2	KRY53863.1_T3	KRX46747.1_T5	KRX79327.1_T6	KRX23449.1_T7	KRZ93890.1_T8	KRX58256.1_T9	KRY16916.1_T12	TP07266_T4	KRZ77959.1_T10	KRZ08719.1_T11
2675	EFV52363_T1	KRZ54209.1_T2	KRY51410.1_T3	KRX44256.1_T5	KRX75905.1_T6	KRX16194.1_T7	KRZ87787.1_T8	KRX56760.1_T9	KRY17065.1_T12	TP12034_T4	KRZ69500.1_T10	KRZ06936.1_T11
2676	EFV52365_T1	KRZ54199.1_T2	KRY51424.1_T3	KRX44262.1_T5	KRX75894.1_T6	KRX16182.1_T7	KRZ87778.1_T8	KRX56784.1_T9	KRY17074.1_T12	TP12032_T4	KRZ69492.1_T10	KRZ06921.1_T11
2677	EFV52366_T1	KRZ54198.1_T2	KRY51417.1_T3	KRX44271.1_T5	KRX75917.1_T6	KRX16191.1_T7	KRZ87801.1_T8	KRX56763.1_T9	KRY17059.1_T12	TP12031_T4	KRZ69493.1_T10	KRZ06938.1_T11
2678	EFV52369_T1	KRZ54191.1_T2	KRY51416.1_T3	KRX44276.1_T5	KRX75889.1_T6	KRX16210.1_T7	KRZ87780.1_T8	KRX56781.1_T9	KRY17049.1_T12	TP12029_T4	KRZ69483.1_T10	KRZ06950.1_T11
2679	EFV52370_T1	KRZ54212.1_T2	KRY51432.1_T3	KRX44278.1_T5	KRX75895.1_T6	KRX16177.1_T7	KRZ87784.1_T8	KRX56767.1_T9	KRY17068.1_T12	TP12028_T4	KRZ69490.1_T10	KRZ06951.1_T11
2680	EFV52372_T1	KRZ54190.1_T2	KRY51427.1_T3	KRX44287.1_T5	KRX75912.1_T6	KRX16192.1_T7	KRZ87786.1_T8	KRX56787.1_T9	KRY17066.1_T12	TP12026_T4	KRZ69496.1_T10	KRZ06928.1_T11
2681	EFV52373_T1	KRZ54202.1_T2	KRY51405.1_T3	KRX44282.1_T5	KRX75910.1_T6	KRX16199.1_T7	KRZ87807.1_T8	KRX56798.1_T9	KRY17029.1_T12	TP12025_T4	KRZ69489.1_T10	KRZ06927.1_T11
2682	EFV52379_T1	KRZ54208.1_T2	KRY51414.1_T3	KRX44267.1_T5	KRX75903.1_T6	KRX16202.1_T7	KRZ87759.1_T8	KRX56779.1_T9	KRY17034.1_T12	TP12021_T4	KRZ69506.1_T10	KRZ06924.1_T11
2683	EFV52382_T1	KRZ54188.1_T2	KRY51434.1_T3	KRX44258.1_T5	KRX75907.1_T6	KRX16179.1_T7	KRZ87790.1_T8	KRX56794.1_T9	KRY17036.1_T12	TP12020_T4	KRZ69510.1_T10	KRZ06922.1_T11
2684	EFV52384_T1	KRZ54218.1_T2	KRY51429.1_T3	KRX44253.1_T5	KRX75924.1_T6	KRX16206.1_T7	KRZ87804.1_T8	KRX56771.1_T9	KRY17038.1_T12	TP12019_T4	KRZ69514.1_T10	KRZ06953.1_T11
2685	EFV52385_T1	KRZ54213.1_T2	KRY51437.1_T3	KRX44259.1_T5	KRX75901.1_T6	KRX16214.1_T7	KRZ87767.1_T8	KRX56776.1_T9	KRY17069.1_T12	TP12018_T4	KRZ69509.1_T10	KRZ06959.1_T11
2686	EFV52386_T1	KRZ54221.1_T2	KRY51403.1_T3	KRX44250.1_T5	KRX75887.1_T6	KRX16213.1_T7	KRZ87770.1_T8	KRX56788.1_T9	KRY17047.1_T12	TP12017_T4	KRZ69512.1_T10	KRZ06944.1_T11
2687	EFV52388_T1	KRZ54210.1_T2	KRY51407.1_T3	KRX44269.1_T5	KRX75902.1_T6	KRX16180.1_T7	KRZ87779.1_T8	KRX56796.1_T9	KRY17040.1_T12	TP12016_T4	KRZ69511.1_T10	KRZ06942.1_T11
2688	EFV52392_T1	KRZ58300.1_T2	KRY51431.1_T3	KRX44270.1_T5	KRX75922.1_T6	KRX16195.1_T7	KRZ82544.1_T8	KRX56801.1_T9	KRY08236.1_T12	TP12014_T4	KRZ69520.1_T10	KRZ06941.1_T11
2689	EFV52403_T1	KRZ53774.1_T2	KRY49322.1_T3	KRX38888.1_T5	KRX72089.1_T6	KRX14026.1_T7	KRZ87789.1_T8	KRX57760.1_T9	KRY17035.1_T12	TP03237_T4	KRZ71988.1_T10	KRZ03708.1_T11
2690	EFV52408_T1	KRZ53789.1_T2	KRY49313.1_T3	KRX38893.1_T5	KRX72080.1_T6	KRX14028.1_T7	KRZ87764.1_T8	KRX57745.1_T9	KRY17057.1_T12	TP03242_T4	KRZ72018.1_T10	KRZ03723.1_T11
2691	EFV52413_T1	KRZ53776.1_T2	KRY49319.1_T3	KRX38890.1_T5	KRX72098.1_T6	KRX14027.1_T7	KRZ87771.1_T8	KRX57766.1_T9	KRY17046.1_T12	TP03246_T4	KRZ71994.1_T10	KRZ03728.1_T11
2693	EFV52419_T1	KRZ53756.1_T2	KRY56375.1_T3	KRX36979.1_T5	KRX70557.1_T6	KRX20655.1_T7	KRZ83206.1_T8	KRX53024.1_T9	KRY09765.1_T12	TP03677_T4	KRZ70016.1_T10	KRZ02560.1_T11
2694	EFV52422_T1	KRZ53781.1_T2	KRY56357.1_T3	KRX36980.1_T5	KRX70571.1_T6	KRX20666.1_T7	KRZ83220.1_T8	KRX53001.1_T9	KRY09776.1_T12	TP03680_T4	KRZ70029.1_T10	KRZ02567.1_T11
2696	EFV52428_T1	KRZ53765.1_T2	KRY56356.1_T3	KRX36982.1_T5	KRX70566.1_T6	KRX20670.1_T7	KRZ83205.1_T8	KRX53011.1_T9	KRY09780.1_T12	TP03686_T4	KRZ72007.1_T10	KRZ02573.1_T11
2697	EFV52434_T1	KRZ57507.1_T2	KRY57675.1_T3	KRX46562.1_T5	KRX77740.1_T6	KRX23402.1_T7	KRZ90911.1_T8	KRX58390.1_T9	KRY11302.1_T12	TP10517_T4	KRZ71983.1_T10	KRZ03950.1_T11
2698	EFV52440_T1	KRZ57494.1_T2	KRY57711.1_T3	KRX46539.1_T5	KRX77765.1_T6	KRX23363.1_T7	KRZ90941.1_T8	KRX58411.1_T9	KRY11316.1_T12	TP10523_T4	KRZ70026.1_T10	KRZ03964.1_T11
2699	EFV52441_T1	KRZ57518.1_T2	KRY57702.1_T3	KRX46531.1_T5	KRX77738.1_T6	KRX23395.1_T7	KRZ90922.1_T8	KRX58405.1_T9	KRY11304.1_T12	TP10525_T4	KRZ70023.1_T10	KRZ03958.1_T11
2700	EFV52446_T1	KRZ57498.1_T2	KRY49164.1_T3	KRX46533.1_T5	KRX77743.1_T6	KRX23461.1_T7	KRZ90904.1_T8	KRX58410.1_T9	KRY12305.1_T12	TP10527_T4	KRZ70037.1_T10	KRZ04713.1_T11
2701	EFV52447_T1	KRZ57484.1_T2	KRY49165.1_T3	KRX46549.1_T5	KRX77771.1_T6	KRX23412.1_T7	KRZ90909.1_T8	KRX58417.1_T9	KRY12293.1_T12	TP10528_T4	KRZ70022.1_T10	KRZ04707.1_T11
2702	EFV52461_T1	KRZ57491.1_T2	KRY57732.1_T3	KRX46532.1_T5	KRX77751.1_T6	KRX23464.1_T7	KRZ90884.1_T8	KRX58384.1_T9	KRY11312.1_T12	TP10514_T4	KRZ71977.1_T10	KRZ03951.1_T11
2703	EFV52463_T1	KRZ57502.1_T2	KRY57674.1_T3	KRX46550.1_T5	KRX77757.1_T6	KRX23470.1_T7	KRZ90903.1_T8	KRX58407.1_T9	KRY11306.1_T12	TP10515_T4	KRZ72006.1_T10	KRZ03945.1_T11
2704	EFV52464_T1	KRZ57493.1_T2	KRY57720.1_T3	KRX46528.1_T5	KRX77754.1_T6	KRX23364.1_T7	KRZ90895.1_T8	KRX58398.1_T9	KRY11314.1_T12	TP10516_T4	KRZ72013.1_T10	KRZ03952.1_T11
2705	EFV52472_T1	KRZ53241.1_T2	KRY48166.1_T3	KRX38968.1_T5	KRX73957.1_T6	KRX19864.1_T7	KRZ90923.1_T8	KRX55416.1_T9	KRY10337.1_T12	TP08299_T4	KRZ67497.1_T10	KRZ08960.1_T11
2706	EFV52474_T1	KRZ53236.1_T2	KRY48170.1_T3	KRX38953.1_T5	KRX73953.1_T6	KRX19851.1_T7	KRZ90946.1_T8	KRX55442.1_T9	KRY10333.1_T12	TP08297_T4	KRZ67488.1_T10	KRZ08931.1_T11
2707	EFV52475_T1	KRZ53234.1_T2	KRY48160.1_T3	KRX38955.1_T5	KRX73946.1_T6	KRX19918.1_T7	KRZ90887.1_T8	KRX55423.1_T9	KRY10340.1_T12	TP08296_T4	KRZ67481.1_T10	KRZ08969.1_T11
2708	EFV52477_T1	KRZ53232.1_T2	KRY48179.1_T3	KRX38950.1_T5	KRX73955.1_T6	KRX19843.1_T7	KRZ90919.1_T8	KRX55432.1_T9	KRY10338.1_T12	TP08291_T4	KRZ67485.1_T10	KRZ08941.1_T11
2709	EFV52479_T1	KRZ53239.1_T2	KRY48177.1_T3	KRX38958.1_T5	KRX73944.1_T6	KRX19880.1_T7	KRZ90888.1_T8	KRX55417.1_T9	KRY10342.1_T12	TP08288_T4	KRZ67486.1_T10	KRZ08918.1_T11
2710	EFV52481_T1	KRZ53228.1_T2	KRY48171.1_T3	KRX38956.1_T5	KRX73960.1_T6	KRX19885.1_T7	KRZ90886.1_T8	KRX55420.1_T9	KRY10335.1_T12	TP08283_T4	KRZ67505.1_T10	KRZ08946.1_T11
2711	EFV52488_T1	KRZ57559.1_T2	KRY55740.1_T3	KRX41524.1_T5	KRX70603.1_T6	KRX14668.1_T7	KRZ90169.1_T8	KRX52363.1_T9	KRY16487.1_T12	TP08266_T4	KRZ76536.1_T10	KRZ02702.1_T11
2712	EFV52489_T1	KRZ57523.1_T2	KRY55751.1_T3	KRX41545.1_T5	KRX70605.1_T6	KRX14666.1_T7	KRZ90219.1_T8	KRX52362.1_T9	KRY16479.1_T12	TP08265_T4	KRZ76561.1_T10	KRZ02700.1_T11
2713	EFV52490_T1	KRZ57527.1_T2	KRY55709.1_T3	KRX41533.1_T5	KRX70601.1_T6	KRX14674.1_T7	KRZ90196.1_T8	KRX52366.1_T9	KRY16442.1_T12	TP08264_T4	KRZ76586.1_T10	KRZ02706.1_T11
2714	EFV52492_T1	KRZ57539.1_T2	KRY55704.1_T3	KRX41529.1_T5	KRX70614.1_T6	KRX14680.1_T7	KRZ90228.1_T8	KRX52367.1_T9	KRY16470.1_T12	TP08263_T4	KRZ76513.1_T10	KRZ02709.1_T11
2715	EFV52493_T1	KRZ57573.1_T2	KRY55763.1_T3	KRX41521.1_T5	KRX70602.1_T6	KRX14671.1_T7	KRZ90184.1_T8	KRX52365.1_T9	KRY16454.1_T12	TP08262_T4	KRZ76500.1_T10	KRZ02697.1_T11
2716	EFV52506_T1	KRZ49473.1_T2	KRY46516.1_T3	KRX37235.1_T5	KRX70912.1_T6	KRX13449.1_T7	KRZ83272.1_T8	KRX56549.1_T9	KRY15747.1_T12	TP03533_T4	KRZ72261.1_T10	KRZ02321.1_T11
2717	EFV52511_T1	KRZ54505.1_T2	KRY48494.1_T3	KRX50576.1_T5	KRX74412.1_T6	KRX16087.1_T7	KRZ93831.1_T8	KRX54056.1_T9	KRY14206.1_T12	TP03551_T4	KRZ67677.1_T10	KRZ04570.1_T11
2718	EFV52513_T1	KRZ54517.1_T2	KRY48493.1_T3	KRX50574.1_T5	KRX74423.1_T6	KRX16086.1_T7	KRZ93830.1_T8	KRX54062.1_T9	KRY14242.1_T12	TP03548_T4	KRZ67683.1_T10	KRZ04564.1_T11
2719	EFV52516_T1	KRZ54514.1_T2	KRY48504.1_T3	KRX50513.1_T5	KRX74418.1_T6	KRX16082.1_T7	KRZ93825.1_T8	KRX54067.1_T9	KRY14232.1_T12	TP03547_T4	KRZ67668.1_T10	KRZ04566.1_T11
2720	EFV52525_T1	KRZ54526.1_T2	KRY48496.1_T3	KRX50566.1_T5	KRX74409.1_T6	KRX16069.1_T7	KRZ93871.1_T8	KRX54080.1_T9	KRY14244.1_T12	TP03539_T4	KRZ67684.1_T10	KRZ04552.1_T11
2721	EFV52526_T1	KRZ54525.1_T2	KRY48507.1_T3	KRX50578.1_T5	KRX74416.1_T6	KRX16079.1_T7	KRZ93906.1_T8	KRX54079.1_T9	KRY14237.1_T12	TP07295_T4	KRZ67669.1_T10	KRZ04556.1_T11
2722	EFV52531_T1	KRZ61438.1_T2	KRY55351.1_T3	KRX44001.1_T5	KRX72603.1_T6	KRX23203.1_T7	KRZ88868.1_T8	KRX60298.1_T9	KRY14471.1_T12	TP03939_T4	KRZ66620.1_T10	KRZ01838.1_T11
2723	EFV52532_T1	KRZ61412.1_T2	KRY55291.1_T3	KRX43968.1_T5	KRX72622.1_T6	KRX23228.1_T7	KRZ88875.1_T8	KRX60272.1_T9	KRY14439.1_T12	TP11176_T4	KRZ70526.1_T10	KRZ07169.1_T11
2724	EFV52533_T1	KRZ61413.1_T2	KRY55301.1_T3	KRX43973.1_T5	KRX72612.1_T6	KRX23212.1_T7	KRZ88880.1_T8	KRX60269.1_T9	KRY14438.1_T12	TP11177_T4	KRZ70524.1_T10	KRZ07209.1_T11
2725	EFV52535_T1	KRZ61431.1_T2	KRY55327.1_T3	KRX43970.1_T5	KRX72621.1_T6	KRX23201.1_T7	KRZ88874.1_T8	KRX60273.1_T9	KRY14437.1_T12	TP11179_T4	KRZ70529.1_T10	KRZ07197.1_T11
2726	EFV52536_T1	KRZ61458.1_T2	KRY55290.1_T3	KRX44005.1_T5	KRX72610.1_T6	KRX23153.1_T7	KRZ88871.1_T8	KRX60296.1_T9	KRY14431.1_T12	TP11180_T4	KRZ70533.1_T10	KRZ07207.1_T11
2727	EFV52537_T1	KRZ61420.1_T2	KRY55309.1_T3	KRX43982.1_T5	KRX72599.1_T6	KRX23174.1_T7	KRZ88847.1_T8	KRX60323.1_T9	KRY14469.1_T12	TP11181_T4	KRZ70542.1_T10	KRZ07172.1_T11
2728	EFV52538_T1	KRZ61435.1_T2	KRY55335.1_T3	KRX43978.1_T5	KRX72591.1_T6	KRX23199.1_T7	KRZ88878.1_T8	KRX60295.1_T9	KRY14436.1_T12	TP11182_T4	KRZ70553.1_T10	KRZ07210.1_T11
2729	EFV52539_T1	KRZ61454.1_T2	KRY55305.1_T3	KRX43976.1_T5	KRX74178.1_T6	KRX23237.1_T7	KRZ88859.1_T8	KRX60306.1_T9	KRY14453.1_T12	TP11183_T4	KRZ70534.1_T10	KRZ07178.1_T11
2730	EFV52540_T1	KRZ61404.1_T2	KRY55294.1_T3	KRX44002.1_T5	KRX74179.1_T6	KRX23225.1_T7	KRZ88893.1_T8	KRX60283.1_T9	KRY14434.1_T12	TP11184_T4	KRZ70558.1_T10	KRZ07202.1_T11
2731	EFV52545_T1	KRZ61478.1_T2	KRY55349.1_T3	KRX43988.1_T5	KRX74181.1_T6	KRX23159.1_T7	KRZ88855.1_T8	KRX60303.1_T9	KRY14455.1_T12	TP11191_T4	KRZ70562.1_T10	KRZ07174.1_T11
2732	EFV52555_T1	KRZ61447.1_T2	KRY55350.1_T3	KRX43974.1_T5	KRX74188.1_T6	KRX23114.1_T7	KRZ88846.1_T8	KRX60278.1_T9	KRY14451.1_T12	TP11201_T4	KRZ70530.1_T10	KRZ07192.1_T11
2733	EFV52560_T1	KRZ57068.1_T2	KRY51673.1_T3	KRX46928.1_T5	KRX77615.1_T6	KRX13399.1_T7	KRZ93506.1_T8	KRX54444.1_T9	KRY09741.1_T12	TP11174_T4	KRZ70525.1_T10	KRZ07196.1_T11
2734	EFV52566_T1	KRZ58848.1_T2	KRY49351.1_T3	KRX41363.1_T5	KRX77585.1_T6	KRX21183.1_T7	KRZ92691.1_T8	KRX54454.1_T9	KRY09743.1_T12	TP03941_T4	KRZ66629.1_T10	KRZ01843.1_T11
2735	EFV52568_T1	KRZ58839.1_T2	KRY49345.1_T3	KRX41354.1_T5	KRX77560.1_T6	KRX21212.1_T7	KRZ92614.1_T8	KRX54458.1_T9	KRY09749.1_T12	TP03942_T4	KRZ66614.1_T10	KRZ01841.1_T11
2736	EFV52570_T1	KRZ58877.1_T2	KRY49332.1_T3	KRX41364.1_T5	KRX77597.1_T6	KRX21242.1_T7	KRZ92667.1_T8	KRX54446.1_T9	KRY09746.1_T12	TP03944_T4	KRZ66625.1_T10	KRZ01835.1_T11
2738	EFV52611_T1	KRZ53969.1_T2	KRY51638.1_T3	KRX41773.1_T5	KRX77579.1_T6	KRX21197.1_T7	KRZ91736.1_T8	KRX60277.1_T9	KRY13928.1_T12	TP02516_T4	KRZ75905.1_T10	KRZ11796.1_T11
2739	EFV52612_T1	KRZ53976.1_T2	KRY51680.1_T3	KRX41760.1_T5	KRX77570.1_T6	KRX21202.1_T7	KRZ91775.1_T8	KRX60271.1_T9	KRY13920.1_T12	TP02515_T4	KRZ75977.1_T10	KRZ11781.1_T11
2740	EFV52613_T1	KRZ53999.1_T2	KRY51664.1_T3	KRX41747.1_T5	KRX77589.1_T6	KRX21213.1_T7	KRZ91762.1_T8	KRX60293.1_T9	KRY13924.1_T12	TP02514_T4	KRZ75961.1_T10	KRZ11833.1_T11
2741	EFV52616_T1	KRZ54001.1_T2	KRY51651.1_T3	KRX41771.1_T5	KRX77611.1_T6	KRX21231.1_T7	KRZ91750.1_T8	KRX60281.1_T9	KRY13915.1_T12	TP02511_T4	KRZ75945.1_T10	KRZ11804.1_T11
2742	EFV52617_T1	KRZ54002.1_T2	KRY51649.1_T3	KRX41750.1_T5	KRX77598.1_T6	KRX21208.1_T7	KRZ91768.1_T8	KRX60265.1_T9	KRY13936.1_T12	TP02510_T4	KRZ75941.1_T10	KRZ11784.1_T11
2743	EFV52618_T1	KRZ53974.1_T2	KRY51675.1_T3	KRX41743.1_T5	KRX77568.1_T6	KRX21254.1_T7	KRZ91731.1_T8	KRX60316.1_T9	KRY13938.1_T12	TP02509_T4	KRZ75920.1_T10	KRZ11818.1_T11
2744	EFV52631_T1	KRZ53979.1_T2	KRY51674.1_T3	KRX41748.1_T5	KRX77612.1_T6	KRX21200.1_T7	KRZ91728.1_T8	KRX60297.1_T9	KRY13939.1_T12	TP02517_T4	KRZ75908.1_T10	KRZ11775.1_T11
2745	EFV52646_T1	KRZ58864.1_T2	KRY49335.1_T3	KRX41351.1_T5	KRX75582.1_T6	KRX21181.1_T7	KRZ86878.1_T8	KRX54544.1_T9	KRY22296.1_T12	TP10549_T4	KRZ76581.1_T10	KRZ11128.1_T11
2746	EFV52647_T1	KRZ58858.1_T2	KRY49348.1_T3	KRX41366.1_T5	KRX75601.1_T6	KRX21232.1_T7	KRZ86877.1_T8	KRX54532.1_T9	KRY22331.1_T12	TP10551_T4	KRZ76562.1_T10	KRZ11151.1_T11
2747	EFV52648_T1	KRZ58860.1_T2	KRY49339.1_T3	KRX41358.1_T5	KRX75603.1_T6	KRX21199.1_T7	KRZ86868.1_T8	KRX54538.1_T9	KRY22337.1_T12	TP10552_T4	KRZ76584.1_T10	KRZ11136.1_T11
2748	EFV52649_T1	KRZ58829.1_T2	KRY49334.1_T3	KRX41353.1_T5	KRX75573.1_T6	KRX21220.1_T7	KRZ86861.1_T8	KRX54530.1_T9	KRY22327.1_T12	TP10553_T4	KRZ76575.1_T10	KRZ11149.1_T11
2749	EFV52650_T1	KRZ58828.1_T2	KRY49349.1_T3	KRX41346.1_T5	KRX75594.1_T6	KRX21176.1_T7	KRZ86842.1_T8	KRX54534.1_T9	KRY22281.1_T12	TP10554_T4	KRZ76542.1_T10	KRZ11176.1_T11
2750	EFV52654_T1	KRZ58865.1_T2	KRY49360.1_T3	KRX41356.1_T5	KRX75581.1_T6	KRX21170.1_T7	KRZ86851.1_T8	KRX54531.1_T9	KRY22341.1_T12	TP10556_T4	KRZ76492.1_T10	KRZ11165.1_T11
2751	EFV52673_T1	KRZ56103.1_T2	KRY49774.1_T3	KRX42706.1_T5	KRX81779.1_T6	KRX19025.1_T7	KRZ93565.1_T8	KRX63598.1_T9	KRY22306.1_T12	TP10574_T4	KRZ76501.1_T10	KRZ11180.1_T11
2752	EFV52675_T1	KRZ48567.1_T2	KRY48750.1_T3	KRX36033.1_T5	KRX81255.1_T6	KRX12991.1_T7	KRZ86867.1_T8	KRX57749.1_T9	KRY22282.1_T12	TP02157_T4	KRZ73639.1_T10	KRZ04161.1_T11
2753	EFV52676_T1	KRZ51397.1_T2	KRY48764.1_T3	KRX36037.1_T5	KRX81219.1_T6	KRX12987.1_T7	KRZ86863.1_T8	KRX57733.1_T9	KRY22252.1_T12	TP02156_T4	KRZ73670.1_T10	KRZ04183.1_T11
2754	EFV52681_T1	KRZ51393.1_T2	KRY48755.1_T3	KRX36039.1_T5	KRX81220.1_T6	KRX13959.1_T7	KRZ86844.1_T8	KRX57773.1_T9	KRY22298.1_T12	TP02150_T4	KRZ73632.1_T10	KRZ04179.1_T11
2755	EFV52683_T1	KRZ51384.1_T2	KRY48759.1_T3	KRX37544.1_T5	KRX81189.1_T6	KRX13974.1_T7	KRZ86870.1_T8	KRX57738.1_T9	KRY22293.1_T12	TP02148_T4	KRZ73682.1_T10	KRZ04166.1_T11
2756	EFV52685_T1	KRZ51380.1_T2	KRY48758.1_T3	KRX37548.1_T5	KRX81201.1_T6	KRX13958.1_T7	KRZ95114.1_T8	KRX57754.1_T9	KRY22279.1_T12	TP02146_T4	KRZ73688.1_T10	KRZ04162.1_T11
2757	EFV52688_T1	KRZ51385.1_T2	KRY48763.1_T3	KRX37546.1_T5	KRX81215.1_T6	KRX13965.1_T7	KRZ95126.1_T8	KRX57746.1_T9	KRY22300.1_T12	TP02143_T4	KRZ73664.1_T10	KRZ04174.1_T11
2758	EFV52689_T1	KRZ51386.1_T2	KRY48756.1_T3	KRX37543.1_T5	KRX81223.1_T6	KRX13973.1_T7	KRZ95137.1_T8	KRX57767.1_T9	KRY22310.1_T12	TP02142_T4	KRZ73638.1_T10	KRZ04164.1_T11
2759	EFV52692_T1	KRZ60371.1_T2	KRY59476.1_T3	KRX44359.1_T5	KRX77700.1_T6	KRX23135.1_T7	KRZ97355.1_T8	KRX61165.1_T9	KRY21785.1_T12	TP10784_T4	KRZ69616.1_T10	KRZ07248.1_T11
2760	EFV52694_T1	KRZ60340.1_T2	KRY59469.1_T3	KRX44338.1_T5	KRX77712.1_T6	KRX23110.1_T7	KRZ97456.1_T8	KRX61167.1_T9	KRY21935.1_T12	TP10781_T4	KRZ69633.1_T10	KRZ07239.1_T11
2761	EFV52697_T1	KRZ60294.1_T2	KRY59508.1_T3	KRX44341.1_T5	KRX69279.1_T6	KRX23204.1_T7	KRZ97434.1_T8	KRX61203.1_T9	KRY20870.1_T12	TP10780_T4	KRZ69624.1_T10	KRZ07223.1_T11
2762	EFV52699_T1	KRZ60286.1_T2	KRY59506.1_T3	KRX44347.1_T5	KRX82614.1_T6	KRX23127.1_T7	KRZ97336.1_T8	KRX61205.1_T9	KRY20932.1_T12	TP10778_T4	KRZ69606.1_T10	KRZ07257.1_T11
2763	EFV52708_T1	KRZ60289.1_T2	KRY59471.1_T3	KRX44363.1_T5	KRX82568.1_T6	KRX23207.1_T7	KRZ97370.1_T8	KRX61221.1_T9	KRY20908.1_T12	TP10769_T4	KRZ69631.1_T10	KRZ07260.1_T11
2764	EFV52709_T1	KRZ60359.1_T2	KRY59473.1_T3	KRX44355.1_T5	KRX82577.1_T6	KRX23124.1_T7	KRZ97528.1_T8	KRX61198.1_T9	KRY20846.1_T12	TP10768_T4	KRZ69604.1_T10	KRZ07241.1_T11
2765	EFV52710_T1	KRZ60290.1_T2	KRY59512.1_T3	KRX44361.1_T5	KRX82586.1_T6	KRX23235.1_T7	KRZ97513.1_T8	KRX61212.1_T9	KRY20851.1_T12	TP10767_T4	KRZ69629.1_T10	KRZ07235.1_T11
2766	EFV52711_T1	KRZ60368.1_T2	KRY59526.1_T3	KRX45529.1_T5	KRX82540.1_T6	KRX23172.1_T7	KRZ97486.1_T8	KRX61209.1_T9	KRY20914.1_T12	TP10766_T4	KRZ69617.1_T10	KRZ07244.1_T11
2767	EFV52712_T1	KRZ60346.1_T2	KRY59442.1_T3	KRX45545.1_T5	KRX82550.1_T6	KRX23142.1_T7	KRZ97496.1_T8	KRX61222.1_T9	KRY20924.1_T12	TP10765_T4	KRZ69618.1_T10	KRZ07252.1_T11
2768	EFV52719_T1	KRZ60322.1_T2	KRY59521.1_T3	KRX45524.1_T5	KRX82562.1_T6	KRX23219.1_T7	KRZ97437.1_T8	KRX55186.1_T9	KRY20849.1_T12	TP10763_T4	KRZ73149.1_T10	KRZ12130.1_T11
2769	EFV52720_T1	KRZ60344.1_T2	KRY59463.1_T3	KRX45531.1_T5	KRX82549.1_T6	KRX23188.1_T7	KRZ97426.1_T8	KRX55212.1_T9	KRY20836.1_T12	TP10762_T4	KRZ73142.1_T10	KRZ12114.1_T11
2770	EFV52725_T1	KRZ60335.1_T2	KRY59430.1_T3	KRX45537.1_T5	KRX82538.1_T6	KRX23230.1_T7	KRZ97339.1_T8	KRX55182.1_T9	KRY20930.1_T12	TP10757_T4	KRZ73169.1_T10	KRZ12079.1_T11
2771	EFV52726_T1	KRZ60355.1_T2	KRY59420.1_T3	KRX45543.1_T5	KRX82622.1_T6	KRX23209.1_T7	KRZ97431.1_T8	KRX55207.1_T9	KRY20848.1_T12	TP10756_T4	KRZ73212.1_T10	KRZ12149.1_T11
2772	EFV52727_T1	KRZ60293.1_T2	KRY59424.1_T3	KRX45569.1_T5	KRX82623.1_T6	KRX23113.1_T7	KRZ97424.1_T8	KRX55222.1_T9	KRY20876.1_T12	TP10755_T4	KRZ73161.1_T10	KRZ12120.1_T11
2773	EFV52728_T1	KRZ60296.1_T2	KRY59438.1_T3	KRX45562.1_T5	KRX82601.1_T6	KRX23156.1_T7	KRZ97392.1_T8	KRX55203.1_T9	KRY20838.1_T12	TP10754_T4	KRZ73189.1_T10	KRZ12080.1_T11
2774	EFV52738_T1	KRZ58830.1_T2	KRY53385.1_T3	KRX40063.1_T5	KRX80243.1_T6	KRX15024.1_T7	KRZ93522.1_T8	KRX60470.1_T9	KRY15740.1_T12	TP02203_T4	KRZ68936.1_T10	KRZ15526.1_T11
2775	EFV52739_T1	KRZ58837.1_T2	KRY53367.1_T3	KRX40058.1_T5	KRX80305.1_T6	KRX15026.1_T7	KRZ93503.1_T8	KRX60447.1_T9	KRY15748.1_T12	TP02202_T4	KRZ68933.1_T10	KRZ15488.1_T11
2776	EFV52750_T1	KRZ58819.1_T2	KRY53382.1_T3	KRX40064.1_T5	KRX80289.1_T6	KRX15031.1_T7	KRZ93560.1_T8	KRX60474.1_T9	KRY15745.1_T12	TP02196_T4	KRZ68938.1_T10	KRZ07243.1_T11
2777	EFV52751_T1	KRZ58826.1_T2	KRY53377.1_T3	KRX40047.1_T5	KRX80280.1_T6	KRX15028.1_T7	KRZ93524.1_T8	KRX60487.1_T9	KRY15757.1_T12	TP02195_T4	KRZ68932.1_T10	KRZ07245.1_T11
2778	EFV52753_T1	KRZ54549.1_T2	KRY57960.1_T3	KRX50718.1_T5	KRX75462.1_T6	KRX17916.1_T7	KRZ93492.1_T8	KRX60435.1_T9	KRY13584.1_T12	TP03621_T4	KRZ69559.1_T10	KRZ15544.1_T11
2779	EFV52755_T1	KRZ54552.1_T2	KRY57958.1_T3	KRX50632.1_T5	KRX75465.1_T6	KRX17888.1_T7	KRZ93465.1_T8	KRX60428.1_T9	KRY13561.1_T12	TP03619_T4	KRZ69532.1_T10	KRZ15531.1_T11
2780	EFV52756_T1	KRZ54569.1_T2	KRY57968.1_T3	KRX50708.1_T5	KRX75452.1_T6	KRX17931.1_T7	KRZ93528.1_T8	KRX60445.1_T9	KRY13593.1_T12	TP03617_T4	KRZ69549.1_T10	KRZ15479.1_T11
2781	EFV52757_T1	KRZ54572.1_T2	KRY58002.1_T3	KRX50691.1_T5	KRX75455.1_T6	KRX17905.1_T7	KRZ93482.1_T8	KRX60471.1_T9	KRY13582.1_T12	TP03614_T4	KRZ69556.1_T10	KRZ15604.1_T11
2783	EFV52759_T1	KRZ54540.1_T2	KRY57948.1_T3	KRX50647.1_T5	KRX75460.1_T6	KRX17946.1_T7	KRZ93555.1_T8	KRX60426.1_T9	KRY13570.1_T12	TP01700_T4	KRZ69547.1_T10	KRZ15522.1_T11
2784	EFV52761_T1	KRZ54576.1_T2	KRY57994.1_T3	KRX50679.1_T5	KRX75451.1_T6	KRX17943.1_T7	KRZ93488.1_T8	KRX60486.1_T9	KRY13594.1_T12	TP01701_T4	KRZ69539.1_T10	KRZ15537.1_T11
2785	EFV52763_T1	KRZ54547.1_T2	KRY58034.1_T3	KRX50621.1_T5	KRX75470.1_T6	KRX17912.1_T7	KRZ93456.1_T8	KRX60473.1_T9	KRY13589.1_T12	TP01703_T4	KRZ69543.1_T10	KRZ15581.1_T11
2786	EFV52764_T1	KRZ54538.1_T2	KRY58018.1_T3	KRX50660.1_T5	KRX75467.1_T6	KRX17884.1_T7	KRZ93463.1_T8	KRX60451.1_T9	KRY13591.1_T12	TP01704_T4	KRZ69526.1_T10	KRZ15501.1_T11
2787	EFV52767_T1	KRZ54554.1_T2	KRY57996.1_T3	KRX50688.1_T5	KRX75458.1_T6	KRX17923.1_T7	KRZ93491.1_T8	KRX60424.1_T9	KRY13583.1_T12	TP01708_T4	KRZ69550.1_T10	KRZ15596.1_T11
2788	EFV52769_T1	KRZ54561.1_T2	KRY57951.1_T3	KRX50698.1_T5	KRX75435.1_T6	KRX17902.1_T7	KRZ93530.1_T8	KRX60476.1_T9	KRY13578.1_T12	TP01711_T4	KRZ69528.1_T10	KRZ15589.1_T11
2789	EFV52770_T1	KRZ54565.1_T2	KRY57945.1_T3	KRX50663.1_T5	KRX75442.1_T6	KRX17926.1_T7	KRZ93494.1_T8	KRX60454.1_T9	KRY13559.1_T12	TP01712_T4	KRZ69557.1_T10	KRZ15543.1_T11
2790	EFV52771_T1	KRZ54558.1_T2	KRY57978.1_T3	KRX50653.1_T5	KRX75464.1_T6	KRX17925.1_T7	KRZ93493.1_T8	KRX60436.1_T9	KRY13562.1_T12	TP01713_T4	KRZ69554.1_T10	KRZ15489.1_T11
2791	EFV52772_T1	KRZ54557.1_T2	KRY58010.1_T3	KRX35557.1_T5	KRX75461.1_T6	KRX17942.1_T7	KRZ93474.1_T8	KRX60463.1_T9	KRY13585.1_T12	TP01714_T4	KRZ69546.1_T10	KRZ15574.1_T11
2792	EFV52780_T1	KRZ50567.1_T2	KRY58997.1_T3	KRX38858.1_T5	KRX71956.1_T6	KRX20658.1_T7	KRZ97466.1_T8	KRX57393.1_T9	KRY15905.1_T12	TP11229_T4	KRZ69971.1_T10	KRZ03610.1_T11
2793	EFV52781_T1	KRZ50554.1_T2	KRY58985.1_T3	KRX38867.1_T5	KRX71942.1_T6	KRX20737.1_T7	KRZ97494.1_T8	KRX57394.1_T9	KRY15902.1_T12	TP11228_T4	KRZ69943.1_T10	KRZ03601.1_T11
2794	EFV52782_T1	KRZ50555.1_T2	KRY59020.1_T3	KRX38868.1_T5	KRX71957.1_T6	KRX20687.1_T7	KRZ97478.1_T8	KRX57375.1_T9	KRY15895.1_T12	TP11227_T4	KRZ69942.1_T10	KRZ03595.1_T11
2795	EFV52785_T1	KRZ50562.1_T2	KRY59003.1_T3	KRX38866.1_T5	KRX71943.1_T6	KRX20674.1_T7	KRZ97352.1_T8	KRX57351.1_T9	KRY15934.1_T12	TP11225_T4	KRZ69974.1_T10	KRZ03607.1_T11
2796	EFV52787_T1	KRZ50563.1_T2	KRY58989.1_T3	KRX38856.1_T5	KRX71954.1_T6	KRX20716.1_T7	KRZ97511.1_T8	KRX57368.1_T9	KRY15894.1_T12	TP11222_T4	KRZ69967.1_T10	KRZ03600.1_T11
2797	EFV52790_T1	KRZ48569.1_T2	KRY58972.1_T3	KRX38871.1_T5	KRX71949.1_T6	KRX20698.1_T7	KRZ97487.1_T8	KRX57366.1_T9	KRY15917.1_T12	TP11219_T4	KRZ69976.1_T10	KRZ03612.1_T11
2798	EFV52792_T1	KRZ48858.1_T2	KRY59018.1_T3	KRX39915.1_T5	KRX77689.1_T6	KRX20729.1_T7	KRZ97443.1_T8	KRX52225.1_T9	KRY08200.1_T12	TP11249_T4	KRZ72445.1_T10	KRZ01917.1_T11
2799	EFV52797_T1	KRZ48857.1_T2	KRY59039.1_T3	KRX39916.1_T5	KRX77706.1_T6	KRX20682.1_T7	KRZ97479.1_T8	KRX52219.1_T9	KRY15931.1_T12	TP11243_T4	KRZ72503.1_T10	KRZ01926.1_T11
2800	EFV52801_T1	KRZ49659.1_T2	KRY59060.1_T3	KRX39901.1_T5	KRX77692.1_T6	KRX20723.1_T7	KRZ97396.1_T8	KRX57376.1_T9	KRY15918.1_T12	TP11241_T4	KRZ69954.1_T10	KRZ11837.1_T11
2801	EFV52802_T1	KRZ49663.1_T2	KRY59030.1_T3	KRX39913.1_T5	KRX77682.1_T6	KRX20703.1_T7	KRZ97449.1_T8	KRX57371.1_T9	KRY15930.1_T12	TP11239_T4	KRZ69959.1_T10	KRZ11791.1_T11
2802	EFV52805_T1	KRZ49655.1_T2	KRY59015.1_T3	KRX39898.1_T5	KRX77733.1_T6	KRX20728.1_T7	KRZ97399.1_T8	KRX57367.1_T9	KRY15892.1_T12	TP11237_T4	KRZ69963.1_T10	KRZ11817.1_T11
2803	EFV52806_T1	KRZ49661.1_T2	KRY58969.1_T3	KRX39899.1_T5	KRX77727.1_T6	KRX20659.1_T7	KRZ97421.1_T8	KRX57385.1_T9	KRY15926.1_T12	TP11236_T4	KRZ69965.1_T10	KRZ11821.1_T11
2804	EFV52807_T1	KRZ49664.1_T2	KRY58979.1_T3	KRX39906.1_T5	KRX77714.1_T6	KRX20731.1_T7	KRZ97403.1_T8	KRX57395.1_T9	KRY15913.1_T12	TP11235_T4	KRZ69953.1_T10	KRZ11811.1_T11
2805	EFV52808_T1	KRZ49658.1_T2	KRY58994.1_T3	KRX39900.1_T5	KRX77693.1_T6	KRX20645.1_T7	KRZ97381.1_T8	KRX57365.1_T9	KRY15906.1_T12	TP11234_T4	KRZ69941.1_T10	KRZ11815.1_T11
2806	EFV52815_T1	KRZ62120.1_T2	KRY46596.1_T3	KRX37005.1_T5	KRX76520.1_T6	KRX17897.1_T7	KRZ83286.1_T8	KRX52744.1_T9	KRY09620.1_T12	TP03453_T4	KRZ66764.1_T10	KRZ02605.1_T11
2807	EFV52816_T1	KRZ62037.1_T2	KRY46583.1_T3	KRX37004.1_T5	KRX76502.1_T6	KRX17910.1_T7	KRZ83289.1_T8	KRX52741.1_T9	KRY09617.1_T12	TP03452_T4	KRZ66769.1_T10	KRZ02592.1_T11
2808	EFV52817_T1	KRZ62109.1_T2	KRY46592.1_T3	KRX37018.1_T5	KRX76496.1_T6	KRX17922.1_T7	KRZ83281.1_T8	KRX52749.1_T9	KRY09607.1_T12	TP03451_T4	KRZ66772.1_T10	KRZ02595.1_T11
2809	EFV52820_T1	KRZ62079.1_T2	KRY46587.1_T3	KRX37012.1_T5	KRX76506.1_T6	KRX17919.1_T7	KRZ83274.1_T8	KRX52758.1_T9	KRY09608.1_T12	TP03449_T4	KRZ66780.1_T10	KRZ02600.1_T11
2810	EFV52821_T1	KRZ62104.1_T2	KRY46604.1_T3	KRX37003.1_T5	KRX76533.1_T6	KRX17917.1_T7	KRZ83288.1_T8	KRX52742.1_T9	KRY09610.1_T12	TP03448_T4	KRZ66776.1_T10	KRZ02587.1_T11
2811	EFV52822_T1	KRZ62020.1_T2	KRY46589.1_T3	KRX37010.1_T5	KRX76534.1_T6	KRX17909.1_T7	KRZ83290.1_T8	KRX52752.1_T9	KRY09618.1_T12	TP03447_T4	KRZ66778.1_T10	KRZ02604.1_T11
2813	EFV52829_T1	KRZ58972.1_T2	KRY55394.1_T3	KRX43668.1_T5	KRX83484.1_T6	KRX21214.1_T7	KRZ92682.1_T8	KRX63566.1_T9	KRY14657.1_T12	TP11278_T4	KRZ69085.1_T10	KRZ11801.1_T11
2814	EFV52830_T1	KRZ58984.1_T2	KRY55408.1_T3	KRX43685.1_T5	KRX83452.1_T6	KRX21198.1_T7	KRZ92686.1_T8	KRX63529.1_T9	KRY14644.1_T12	TP11277_T4	KRZ69086.1_T10	KRZ11790.1_T11
2815	EFV52831_T1	KRZ58955.1_T2	KRY55402.1_T3	KRX43689.1_T5	KRX83499.1_T6	KRX21237.1_T7	KRZ92632.1_T8	KRX63516.1_T9	KRY14645.1_T12	TP11276_T4	KRZ69098.1_T10	KRZ11835.1_T11
2816	EFV52833_T1	KRZ58981.1_T2	KRY55380.1_T3	KRX43684.1_T5	KRX83429.1_T6	KRX21250.1_T7	KRZ92629.1_T8	KRX63595.1_T9	KRY14659.1_T12	TP11274_T4	KRZ69092.1_T10	KRZ11783.1_T11
2817	EFV52841_T1	KRZ58947.1_T2	KRY55386.1_T3	KRX43682.1_T5	KRX83466.1_T6	KRX21182.1_T7	KRZ92685.1_T8	KRX63548.1_T9	KRY14666.1_T12	TP11266_T4	KRZ69090.1_T10	KRZ11819.1_T11
2818	EFV52842_T1	KRZ58956.1_T2	KRY55407.1_T3	KRX43687.1_T5	KRX83506.1_T6	KRX21251.1_T7	KRZ92668.1_T8	KRX63501.1_T9	KRY14669.1_T12	TP11265_T4	KRZ69105.1_T10	KRZ11831.1_T11
2819	EFV52843_T1	KRZ58973.1_T2	KRY55383.1_T3	KRX43667.1_T5	KRX83435.1_T6	KRX21247.1_T7	KRZ92699.1_T8	KRX63562.1_T9	KRY14648.1_T12	TP11264_T4	KRZ69111.1_T10	KRZ11813.1_T11
2820	EFV52863_T1	KRZ56089.1_T2	KRY59058.1_T3	KRX35733.1_T5	KRX69878.1_T6	KRX16096.1_T7	KRZ86875.1_T8	KRX54537.1_T9	KRY19219.1_T12	TP11149_T4	KRZ75909.1_T10	KRZ07483.1_T11
2821	EFV52864_T1	KRZ56081.1_T2	KRY59027.1_T3	KRX35737.1_T5	KRX69876.1_T6	KRX16065.1_T7	KRZ86865.1_T8	KRX54540.1_T9	KRY19211.1_T12	TP11147_T4	KRZ75950.1_T10	KRZ07509.1_T11
2822	EFV52869_T1	KRZ55288.1_T2	KRY59012.1_T3	KRX44395.1_T5	KRX83444.1_T6	KRX19060.1_T7	KRZ92659.1_T8	KRX63507.1_T9	KRY19226.1_T12	TP11145_T4	KRZ75930.1_T10	KRZ07515.1_T11
2823	EFV52871_T1	KRZ55289.1_T2	KRY59046.1_T3	KRX44390.1_T5	KRX83494.1_T6	KRX19049.1_T7	KRZ92648.1_T8	KRX63504.1_T9	KRY19229.1_T12	TP11141_T4	KRZ75921.1_T10	KRZ07467.1_T11
2824	EFV52873_T1	KRZ55285.1_T2	KRY58982.1_T3	KRX44392.1_T5	KRX83431.1_T6	KRX19029.1_T7	KRZ92621.1_T8	KRX63602.1_T9	KRY19203.1_T12	TP11139_T4	KRZ75878.1_T10	KRZ07480.1_T11
2825	EFV52874_T1	KRZ55273.1_T2	KRY59014.1_T3	KRX44397.1_T5	KRX83411.1_T6	KRX19055.1_T7	KRZ92631.1_T8	KRX63606.1_T9	KRY19187.1_T12	TP11138_T4	KRZ75886.1_T10	KRZ07501.1_T11
2826	EFV52875_T1	KRZ55287.1_T2	KRY59023.1_T3	KRX44396.1_T5	KRX83451.1_T6	KRX19046.1_T7	KRZ92622.1_T8	KRX63554.1_T9	KRY19230.1_T12	TP11137_T4	KRZ75937.1_T10	KRZ07465.1_T11
2827	EFV52880_T1	KRZ55302.1_T2	KRY59000.1_T3	KRX44404.1_T5	KRX83427.1_T6	KRX19043.1_T7	KRZ92643.1_T8	KRX63593.1_T9	KRY19191.1_T12	TP11132_T4	KRZ75949.1_T10	KRZ07503.1_T11
2828	EFV52888_T1	KRZ55292.1_T2	KRY58981.1_T3	KRX44385.1_T5	KRX83441.1_T6	KRX19077.1_T7	KRZ92641.1_T8	KRX63597.1_T9	KRY19179.1_T12	TP11128_T4	KRZ75965.1_T10	KRZ07482.1_T11
2829	EFV52901_T1	KRZ51381.1_T2	KRY48762.1_T3	KRX37541.1_T5	KRX81183.1_T6	KRX13956.1_T7	KRZ95179.1_T8	KRX57758.1_T9	KRY22325.1_T12	TP02141_T4	KRZ73649.1_T10	KRZ04182.1_T11
2830	EFV52905_T1	KRZ59810.1_T2	KRY54877.1_T3	KRX49716.1_T5	KRX83076.1_T6	KRX26156.1_T7	KRZ89733.1_T8	KRX64048.1_T9	KRY17427.1_T12	TP01125_T4	KRZ78588.1_T10	KRZ13289.1_T11
2831	EFV52912_T1	KRZ59773.1_T2	KRY54864.1_T3	KRX49681.1_T5	KRX82993.1_T6	KRX26230.1_T7	KRZ89754.1_T8	KRX64085.1_T9	KRY17413.1_T12	TP01132_T4	KRZ78633.1_T10	KRZ13300.1_T11
2832	EFV52913_T1	KRZ59777.1_T2	KRY54868.1_T3	KRX49713.1_T5	KRX82985.1_T6	KRX26151.1_T7	KRZ89768.1_T8	KRX64105.1_T9	KRY17390.1_T12	TP01133_T4	KRZ78679.1_T10	KRZ13272.1_T11
2833	EFV52914_T1	KRZ59768.1_T2	KRY54890.1_T3	KRX49690.1_T5	KRX83014.1_T6	KRX26330.1_T7	KRZ89737.1_T8	KRX64119.1_T9	KRY17382.1_T12	TP01135_T4	KRZ78696.1_T10	KRZ13301.1_T11
2834	EFV52916_T1	KRZ59795.1_T2	KRY54869.1_T3	KRX49734.1_T5	KRX83083.1_T6	KRX26191.1_T7	KRZ89759.1_T8	KRX64025.1_T9	KRY17383.1_T12	TP01137_T4	KRZ78663.1_T10	KRZ13249.1_T11
2835	EFV52928_T1	KRZ59758.1_T2	KRY54866.1_T3	KRX49700.1_T5	KRX83065.1_T6	KRX26177.1_T7	KRZ89719.1_T8	KRX64091.1_T9	KRY17401.1_T12	TP03388_T4	KRZ78658.1_T10	KRZ13349.1_T11
2836	EFV52929_T1	KRZ59797.1_T2	KRY54854.1_T3	KRX49706.1_T5	KRX83081.1_T6	KRX26258.1_T7	KRZ89753.1_T8	KRX64022.1_T9	KRY17375.1_T12	TP03385_T4	KRZ78653.1_T10	KRZ13363.1_T11
2837	EFV52930_T1	KRZ59813.1_T2	KRY54884.1_T3	KRX49736.1_T5	KRX83090.1_T6	KRX26286.1_T7	KRZ89749.1_T8	KRX64029.1_T9	KRY17418.1_T12	TP03383_T4	KRZ78646.1_T10	KRZ13315.1_T11
2838	EFV52931_T1	KRZ59798.1_T2	KRY54879.1_T3	KRX49696.1_T5	KRX83008.1_T6	KRX26334.1_T7	KRZ89780.1_T8	KRX64115.1_T9	KRY17417.1_T12	TP03382_T4	KRZ78573.1_T10	KRZ13346.1_T11
2839	EFV52934_T1	KRZ59803.1_T2	KRY54885.1_T3	KRX49764.1_T5	KRX83046.1_T6	KRX26347.1_T7	KRZ89724.1_T8	KRX64033.1_T9	KRY17419.1_T12	TP03381_T4	KRZ78662.1_T10	KRZ13275.1_T11
2840	EFV52938_T1	KRZ59809.1_T2	KRY54872.1_T3	KRX49710.1_T5	KRX83035.1_T6	KRX26187.1_T7	KRZ89758.1_T8	KRX64020.1_T9	KRY17425.1_T12	TP03378_T4	KRZ78652.1_T10	KRZ13332.1_T11
2841	EFV52940_T1	KRZ59807.1_T2	KRY54844.1_T3	KRX49765.1_T5	KRX83067.1_T6	KRX26196.1_T7	KRZ89757.1_T8	KRX64117.1_T9	KRY17420.1_T12	TP03376_T4	KRZ78593.1_T10	KRZ13269.1_T11
2842	EFV52942_T1	KRZ59763.1_T2	KRY54892.1_T3	KRX49717.1_T5	KRX82983.1_T6	KRX26228.1_T7	KRZ89770.1_T8	KRX64094.1_T9	KRY17380.1_T12	TP03374_T4	KRZ78661.1_T10	KRZ13365.1_T11
2843	EFV52962_T1	KRZ52406.1_T2	KRY59321.1_T3	KRX38336.1_T5	KRX80047.1_T6	KRX15508.1_T7	KRZ90578.1_T8	KRX58864.1_T9	KRY11635.1_T12	TP11884_T4	KRZ73141.1_T10	KRZ13261.1_T11
2844	EFV52966_T1	KRZ52402.1_T2	KRY59407.1_T3	KRX38325.1_T5	KRX79981.1_T6	KRX15509.1_T7	KRZ90576.1_T8	KRX58897.1_T9	KRY11610.1_T12	TP11886_T4	KRZ73139.1_T10	KRZ13273.1_T11
2845	EFV52967_T1	KRZ52388.1_T2	KRY59337.1_T3	KRX38337.1_T5	KRX80029.1_T6	KRX15524.1_T7	KRZ90573.1_T8	KRX58870.1_T9	KRY11604.1_T12	TP11887_T4	KRZ73194.1_T10	KRZ13348.1_T11
2846	EFV52968_T1	KRZ52389.1_T2	KRY59384.1_T3	KRX38321.1_T5	KRX79965.1_T6	KRX15503.1_T7	KRZ90579.1_T8	KRX58884.1_T9	KRY11634.1_T12	TP11888_T4	KRZ73170.1_T10	KRZ13247.1_T11
2847	EFV52970_T1	KRZ52396.1_T2	KRY59406.1_T3	KRX38340.1_T5	KRX80012.1_T6	KRX15516.1_T7	KRZ90622.1_T8	KRX58865.1_T9	KRY11630.1_T12	TP11890_T4	KRZ73203.1_T10	KRZ13360.1_T11
2848	EFV52975_T1	KRZ52408.1_T2	KRY59380.1_T3	KRX38322.1_T5	KRX79972.1_T6	KRX15506.1_T7	KRZ90567.1_T8	KRX58907.1_T9	KRY11613.1_T12	TP11894_T4	KRZ72452.1_T10	KRZ13367.1_T11
2849	EFV52985_T1	KRZ49448.1_T2	KRY54759.1_T3	KRX37374.1_T5	KRX73366.1_T6	KRX19866.1_T7	KRZ90572.1_T8	KRX56505.1_T9	KRY12981.1_T12	TP03264_T4	KRZ71484.1_T10	KRZ02048.1_T11
2850	EFV52987_T1	KRZ49459.1_T2	KRY54745.1_T3	KRX37375.1_T5	KRX73372.1_T6	KRX19921.1_T7	KRZ90575.1_T8	KRX56518.1_T9	KRY12979.1_T12	TP03257_T4	KRZ71477.1_T10	KRZ17779.1_T11
2851	EFV53007_T1	KRZ54980.1_T2	KRY49553.1_T3	KRX42540.1_T5	KRX74635.1_T6	KRX14969.1_T7	KRZ85204.1_T8	KRX56829.1_T9	KRY12967.1_T12	TP01226_T4	KRZ67857.1_T10	KRZ17737.1_T11
2852	EFV53013_T1	KRZ54992.1_T2	KRY49560.1_T3	KRX42545.1_T5	KRX74642.1_T6	KRX14981.1_T7	KRZ85211.1_T8	KRX56820.1_T9	KRY12955.1_T12	TP01223_T4	KRZ67853.1_T10	KRZ17913.1_T11
2853	EFV53014_T1	KRZ54995.1_T2	KRY49559.1_T3	KRX42541.1_T5	KRX74652.1_T6	KRX14963.1_T7	KRZ85216.1_T8	KRX56833.1_T9	KRY12951.1_T12	TP01222_T4	KRZ71445.1_T10	KRZ02670.1_T11
2854	EFV53021_T1	KRZ54999.1_T2	KRY49563.1_T3	KRX42528.1_T5	KRX74639.1_T6	KRX14974.1_T7	KRZ85220.1_T8	KRX56810.1_T9	KRY12959.1_T12	TP01219_T4	KRZ71446.1_T10	KRZ02673.1_T11
2855	EFV53023_T1	KRZ54994.1_T2	KRY49561.1_T3	KRX42521.1_T5	KRX74657.1_T6	KRX14976.1_T7	KRZ85213.1_T8	KRX56830.1_T9	KRY12963.1_T12	TP01218_T4	KRZ71456.1_T10	KRZ02680.1_T11
2856	EFV53025_T1	KRZ54990.1_T2	KRY49558.1_T3	KRX42542.1_T5	KRX74653.1_T6	KRX14958.1_T7	KRZ85199.1_T8	KRX56849.1_T9	KRY12952.1_T12	TP01216_T4	KRZ71472.1_T10	KRZ02677.1_T11
2857	EFV53035_T1	KRZ58064.1_T2	KRY54762.1_T3	KRX39591.1_T5	KRX81525.1_T6	KRX16528.1_T7	KRZ90771.1_T8	KRX67165.1_T9	KRY13195.1_T12	TP10492_T4	KRZ71343.1_T10	KRZ09285.1_T11
2858	EFV53036_T1	KRZ58036.1_T2	KRY54725.1_T3	KRX39580.1_T5	KRX81484.1_T6	KRX16526.1_T7	KRZ90793.1_T8	KRX67297.1_T9	KRY13194.1_T12	TP10491_T4	KRZ71318.1_T10	KRZ09284.1_T11
2859	EFV53037_T1	KRZ58049.1_T2	KRY54721.1_T3	KRX39582.1_T5	KRX81505.1_T6	KRX16558.1_T7	KRZ90782.1_T8	KRX67335.1_T9	KRY13200.1_T12	TP10490_T4	KRZ71356.1_T10	KRZ09268.1_T11
2860	EFV53038_T1	KRZ58026.1_T2	KRY54728.1_T3	KRX39590.1_T5	KRX81545.1_T6	KRX16535.1_T7	KRZ90750.1_T8	KRX67263.1_T9	KRY13198.1_T12	TP10489_T4	KRZ71358.1_T10	KRZ09264.1_T11
2861	EFV53040_T1	KRZ58030.1_T2	KRY54722.1_T3	KRX39586.1_T5	KRX81544.1_T6	KRX16538.1_T7	KRZ90755.1_T8	KRX67176.1_T9	KRY13177.1_T12	TP10487_T4	KRZ71346.1_T10	KRZ09250.1_T11
2862	EFV53043_T1	KRZ58058.1_T2	KRY54752.1_T3	KRX39579.1_T5	KRX81555.1_T6	KRX16543.1_T7	KRZ90794.1_T8	KRX67211.1_T9	KRY13183.1_T12	TP10486_T4	KRZ71357.1_T10	KRZ09267.1_T11
2863	EFV53044_T1	KRZ58042.1_T2	KRY54730.1_T3	KRX39606.1_T5	KRX81500.1_T6	KRX16536.1_T7	KRZ90737.1_T8	KRX67177.1_T9	KRY13190.1_T12	TP10484_T4	KRZ71326.1_T10	KRZ09271.1_T11
2864	EFV53045_T1	KRZ58052.1_T2	KRY54743.1_T3	KRX39607.1_T5	KRX81526.1_T6	KRX16557.1_T7	KRZ90767.1_T8	KRX67186.1_T9	KRY13184.1_T12	TP10483_T4	KRZ71347.1_T10	KRZ09294.1_T11
2865	EFV53049_T1	KRZ58059.1_T2	KRY54729.1_T3	KRX36908.1_T5	KRX81519.1_T6	KRX16540.1_T7	KRZ90791.1_T8	KRX67190.1_T9	KRY13176.1_T12	TP10481_T4	KRZ71335.1_T10	KRZ09240.1_T11
2866	EFV53071_T1	KRZ48926.1_T2	KRY47366.1_T3	KRX35853.1_T5	KRX77998.1_T6	KRX25405.1_T7	KRZ84421.1_T8	KRX53443.1_T9	KRY13278.1_T12	TP03851_T4	KRZ78520.1_T10	KRZ05574.1_T11
2867	EFV53072_T1	KRZ48928.1_T2	KRY47377.1_T3	KRX35858.1_T5	KRX77991.1_T6	KRX25320.1_T7	KRZ84418.1_T8	KRX53466.1_T9	KRY13301.1_T12	TP03850_T4	KRZ78393.1_T10	KRZ05563.1_T11
2868	EFV53075_T1	KRZ48918.1_T2	KRY47355.1_T3	KRX35864.1_T5	KRX74756.1_T6	KRX25379.1_T7	KRZ84423.1_T8	KRX53456.1_T9	KRY13314.1_T12	TP03849_T4	KRZ78390.1_T10	KRZ05582.1_T11
2869	EFV53076_T1	KRZ48924.1_T2	KRY47372.1_T3	KRX35857.1_T5	KRX74746.1_T6	KRX25495.1_T7	KRZ84426.1_T8	KRX53444.1_T9	KRY13273.1_T12	TP03845_T4	KRZ78440.1_T10	KRZ05585.1_T11
2870	EFV53077_T1	KRZ48929.1_T2	KRY47383.1_T3	KRX35865.1_T5	KRX74728.1_T6	KRX25314.1_T7	KRZ84432.1_T8	KRX53454.1_T9	KRY13298.1_T12	TP03846_T4	KRZ78432.1_T10	KRZ05564.1_T11
2871	EFV53090_T1	KRZ51412.1_T2	KRY60811.1_T3	KRX37390.1_T5	KRX78023.1_T6	KRX17407.1_T7	KRZ83777.1_T8	KRX57092.1_T9	KRY13315.1_T12	TP03916_T4	KRZ71128.1_T10	KRZ01958.1_T11
2872	EFV53092_T1	KRZ51402.1_T2	KRY60823.1_T3	KRX37395.1_T5	KRX78030.1_T6	KRX17431.1_T7	KRZ83772.1_T8	KRX57123.1_T9	KRY13283.1_T12	TP03915_T4	KRZ71091.1_T10	KRZ01945.1_T11
2873	EFV53093_T1	KRZ51419.1_T2	KRY60816.1_T3	KRX37392.1_T5	KRX78032.1_T6	KRX17430.1_T7	KRZ83789.1_T8	KRX57108.1_T9	KRY13293.1_T12	TP03914_T4	KRZ71103.1_T10	KRZ01948.1_T11
2874	EFV53102_T1	KRZ51405.1_T2	KRY60796.1_T3	KRX37389.1_T5	KRX77983.1_T6	KRX17440.1_T7	KRZ83775.1_T8	KRX57116.1_T9	KRY13306.1_T12	TP03918_T4	KRZ71107.1_T10	KRZ01952.1_T11
2875	EFV53109_T1	KRZ51220.1_T2	KRY48377.1_T3	KRX42637.1_T5	KRX78015.1_T6	KRX26324.1_T7	KRZ86454.1_T8	KRX57118.1_T9	KRY14599.1_T12	TP11773_T4	KRZ71110.1_T10	KRZ11543.1_T11
2876	EFV53114_T1	KRZ51217.1_T2	KRY48370.1_T3	KRX42650.1_T5	KRX78018.1_T6	KRX26203.1_T7	KRZ86476.1_T8	KRX57135.1_T9	KRY14589.1_T12	TP11770_T4	KRZ71078.1_T10	KRZ11473.1_T11
2877	EFV53120_T1	KRZ51213.1_T2	KRY48369.1_T3	KRX42622.1_T5	KRX78040.1_T6	KRX26175.1_T7	KRZ86465.1_T8	KRX57112.1_T9	KRY14571.1_T12	TP11768_T4	KRZ71109.1_T10	KRZ11541.1_T11
2878	EFV53122_T1	KRZ51232.1_T2	KRY48384.1_T3	KRX42627.1_T5	KRX78017.1_T6	KRX26234.1_T7	KRZ86470.1_T8	KRX57098.1_T9	KRY14592.1_T12	TP11767_T4	KRZ71087.1_T10	KRZ11515.1_T11
2880	EFV53163_T1	KRZ56982.1_T2	KRY50977.1_T3	KRX41553.1_T5	KRX77726.1_T6	KRX18707.1_T7	KRZ95612.1_T8	KRX61637.1_T9	KRY15476.1_T12	TP10436_T4	KRZ68104.1_T10	KRZ09470.1_T11
2881	EFV53168_T1	KRZ56995.1_T2	KRY50984.1_T3	KRX41585.1_T5	KRX77728.1_T6	KRX18709.1_T7	KRZ95585.1_T8	KRX61550.1_T9	KRY15415.1_T12	TP10431_T4	KRZ68121.1_T10	KRZ09461.1_T11
2882	EFV53188_T1	KRZ56994.1_T2	KRY46523.1_T3	KRX36052.1_T5	KRX72356.1_T6	KRX18665.1_T7	KRZ83077.1_T8	KRX53354.1_T9	KRY15431.1_T12	TP10406_T4	KRZ67629.1_T10	KRZ09460.1_T11
2883	EFV53213_T1	KRZ56998.1_T2	KRY47024.1_T3	KRX36465.1_T5	KRX71214.1_T6	KRX19949.1_T7	KRZ84356.1_T8	KRX59373.1_T9	KRY09230.1_T12	TP10443_T4	KRZ68124.1_T10	KRZ09485.1_T11
2884	EFV53229_T1	KRZ58990.1_T2	KRY46364.1_T3	KRX36310.1_T5	KRX70120.1_T6	KRX17776.1_T7	KRZ84491.1_T8	KRX59396.1_T9	KRY09150.1_T12	TP09751_T4	KRZ66912.1_T10	KRZ11083.1_T11
2885	EFV53236_T1	KRZ59041.1_T2	KRY46362.1_T3	KRX36321.1_T5	KRX70125.1_T6	KRX17783.1_T7	KRZ84477.1_T8	KRX59388.1_T9	KRY09145.1_T12	TP09747_T4	KRZ66905.1_T10	KRZ11033.1_T11
2887	EFV53246_T1	KRZ51490.1_T2	KRY54552.1_T3	KRX39166.1_T5	KRX74465.1_T6	KRX17809.1_T7	KRZ84160.1_T8	KRX56619.1_T9	KRY12630.1_T12	TP09725_T4	KRZ70450.1_T10	KRZ11069.1_T11
2888	EFV53247_T1	KRZ51501.1_T2	KRY54553.1_T3	KRX39171.1_T5	KRX74478.1_T6	KRX17792.1_T7	KRZ84157.1_T8	KRX56620.1_T9	KRY12631.1_T12	TP09726_T4	KRZ70423.1_T10	KRZ11024.1_T11
2889	EFV53248_T1	KRZ51503.1_T2	KRY54600.1_T3	KRX39177.1_T5	KRX74460.1_T6	KRX17816.1_T7	KRZ84153.1_T8	KRX56645.1_T9	KRY12637.1_T12	TP09727_T4	KRZ70442.1_T10	KRZ11093.1_T11
2891	EFV53279_T1	KRZ51509.1_T2	KRY54576.1_T3	KRX39167.1_T5	KRX74466.1_T6	KRX17781.1_T7	KRZ84155.1_T8	KRX56629.1_T9	KRY12651.1_T12	TP09707_T4	KRZ70448.1_T10	KRZ11057.1_T11
2892	EFV53280_T1	KRZ51491.1_T2	KRY54580.1_T3	KRX39186.1_T5	KRX74444.1_T6	KRX17790.1_T7	KRZ84162.1_T8	KRX56618.1_T9	KRY12619.1_T12	TP09708_T4	KRZ70430.1_T10	KRZ11078.1_T11
2893	EFV53281_T1	KRZ51507.1_T2	KRY54572.1_T3	KRX39185.1_T5	KRX74450.1_T6	KRX17793.1_T7	KRZ84171.1_T8	KRX56628.1_T9	KRY12644.1_T12	TP09709_T4	KRZ70449.1_T10	KRZ11067.1_T11
2894	EFV53282_T1	KRZ51493.1_T2	KRY54609.1_T3	KRX39180.1_T5	KRX74448.1_T6	KRX17787.1_T7	KRZ84169.1_T8	KRX56634.1_T9	KRY12620.1_T12	TP09710_T4	KRZ70408.1_T10	KRZ11089.1_T11
2895	EFV53283_T1	KRZ51498.1_T2	KRY54611.1_T3	KRX39184.1_T5	KRX74463.1_T6	KRX17777.1_T7	KRZ84174.1_T8	KRX56623.1_T9	KRY12648.1_T12	TP09711_T4	KRZ70409.1_T10	KRZ11048.1_T11
2896	EFV53284_T1	KRZ51489.1_T2	KRY54619.1_T3	KRX39182.1_T5	KRX74467.1_T6	KRX17795.1_T7	KRZ84156.1_T8	KRX56625.1_T9	KRY12628.1_T12	TP09714_T4	KRZ70438.1_T10	KRZ11094.1_T11
2897	EFV53285_T1	KRZ51494.1_T2	KRY54554.1_T3	KRX39168.1_T5	KRX74474.1_T6	KRX17814.1_T7	KRZ84168.1_T8	KRX56616.1_T9	KRY12627.1_T12	TP09715_T4	KRZ70416.1_T10	KRZ11028.1_T11
2898	EFV53300_T1	KRZ48252.1_T2	KRY54563.1_T3	KRX36547.1_T5	KRX71185.1_T6	KRX13126.1_T7	KRZ82670.1_T8	KRX52829.1_T9	KRY07896.1_T12	TP09704_T4	KRZ70454.1_T10	KRZ11030.1_T11
2899	EFV53316_T1	KRZ49524.1_T2	KRY45574.1_T3	KRX36850.1_T5	KRX71329.1_T6	KRX19720.1_T7	KRZ84352.1_T8	KRX51817.1_T9	KRY09699.1_T12	TP09977_T4	KRZ66456.1_T10	KRZ10798.1_T11
2900	EFV53324_T1	KRZ56581.1_T2	KRY53483.1_T3	KRX43384.1_T5	KRX72702.1_T6	KRX19669.1_T7	KRZ94206.1_T8	KRX60126.1_T9	KRY15058.1_T12	TP09992_T4	KRZ80260.1_T10	KRZ10763.1_T11
2901	EFV53329_T1	KRZ56604.1_T2	KRY53456.1_T3	KRX36513.1_T5	KRX72704.1_T6	KRX19683.1_T7	KRZ83122.1_T8	KRX60144.1_T9	KRY09921.1_T12	TP09988_T4	KRZ80345.1_T10	KRZ10793.1_T11
2902	EFV53334_T1	KRZ56605.1_T2	KRY53453.1_T3	KRX43377.1_T5	KRX81798.1_T6	KRX19680.1_T7	KRZ94187.1_T8	KRX60171.1_T9	KRY15039.1_T12	TP10011_T4	KRZ80303.1_T10	KRZ10811.1_T11
2903	EFV53343_T1	KRZ56583.1_T2	KRY53497.1_T3	KRX43366.1_T5	KRX81835.1_T6	KRX19749.1_T7	KRZ94156.1_T8	KRX60178.1_T9	KRY15054.1_T12	TP10003_T4	KRZ80168.1_T10	KRZ10784.1_T11
2904	EFV53345_T1	KRZ56558.1_T2	KRY53501.1_T3	KRX43375.1_T5	KRX81781.1_T6	KRX19652.1_T7	KRZ94121.1_T8	KRX60119.1_T9	KRY15034.1_T12	TP10000_T4	KRZ80310.1_T10	KRZ10752.1_T11
2905	EFV53346_T1	KRZ56568.1_T2	KRY53462.1_T3	KRX43358.1_T5	KRX72700.1_T6	KRX19740.1_T7	KRZ94220.1_T8	KRX60162.1_T9	KRY15042.1_T12	TP09998_T4	KRZ80189.1_T10	KRZ10767.1_T11
2906	EFV53347_T1	KRZ56564.1_T2	KRY53461.1_T3	KRX43368.1_T5	KRX72715.1_T6	KRX19724.1_T7	KRZ94232.1_T8	KRX60152.1_T9	KRY15052.1_T12	TP09997_T4	KRZ80250.1_T10	KRZ10779.1_T11
2907	EFV53348_T1	KRZ56561.1_T2	KRY53444.1_T3	KRX43382.1_T5	KRX72718.1_T6	KRX19708.1_T7	KRZ94102.1_T8	KRX60173.1_T9	KRY15025.1_T12	TP09996_T4	KRZ80212.1_T10	KRZ10801.1_T11
2908	EFV53349_T1	KRZ56573.1_T2	KRY53488.1_T3	KRX43372.1_T5	KRX72713.1_T6	KRX19736.1_T7	KRZ94131.1_T8	KRX60149.1_T9	KRY15030.1_T12	TP09995_T4	KRZ80155.1_T10	KRZ10771.1_T11
2909	EFV53375_T1	KRZ56892.1_T2	KRY53292.1_T3	KRX46162.1_T5	KRX79513.1_T6	KRX19147.1_T7	KRZ86495.1_T8	KRX60595.1_T9	KRY18487.1_T12	TP12338_T4	KRZ70125.1_T10	KRZ14491.1_T11
2910	EFV53376_T1	KRZ56903.1_T2	KRY53256.1_T3	KRX46167.1_T5	KRX79509.1_T6	KRX19092.1_T7	KRZ86523.1_T8	KRX60624.1_T9	KRY18450.1_T12	TP12337_T4	KRZ70121.1_T10	KRZ14534.1_T11
2911	EFV53377_T1	KRZ56879.1_T2	KRY53279.1_T3	KRX46158.1_T5	KRX79487.1_T6	KRX19119.1_T7	KRZ86512.1_T8	KRX60609.1_T9	KRY18466.1_T12	TP12336_T4	KRZ70123.1_T10	KRZ14469.1_T11
2912	EFV53378_T1	KRZ56899.1_T2	KRY53263.1_T3	KRX46153.1_T5	KRX79508.1_T6	KRX19097.1_T7	KRZ86493.1_T8	KRX60607.1_T9	KRY18498.1_T12	TP12335_T4	KRZ70099.1_T10	KRZ14538.1_T11
2913	EFV53379_T1	KRZ56905.1_T2	KRY53261.1_T3	KRX46159.1_T5	KRX79491.1_T6	KRX19146.1_T7	KRZ86491.1_T8	KRX60613.1_T9	KRY18508.1_T12	TP12334_T4	KRZ70102.1_T10	KRZ14499.1_T11
2914	EFV53380_T1	KRZ56891.1_T2	KRY53288.1_T3	KRX46163.1_T5	KRX79512.1_T6	KRX19144.1_T7	KRZ86511.1_T8	KRX60603.1_T9	KRY18452.1_T12	TP12333_T4	KRZ70120.1_T10	KRZ14485.1_T11
2915	EFV53398_T1	KRZ59729.1_T2	KRY47296.1_T3	KRX38393.1_T5	KRX70945.1_T6	KRX13949.1_T7	KRZ86729.1_T8	KRX53490.1_T9	KRY18510.1_T12	TP03323_T4	KRZ67427.1_T10	KRZ03424.1_T11
2916	EFV53399_T1	KRZ59738.1_T2	KRY47303.1_T3	KRX38385.1_T5	KRX70949.1_T6	KRX13936.1_T7	KRZ86742.1_T8	KRX53495.1_T9	KRY18453.1_T12	TP03322_T4	KRZ67424.1_T10	KRZ03453.1_T11
2917	EFV53400_T1	KRZ59748.1_T2	KRY47284.1_T3	KRX38377.1_T5	KRX70947.1_T6	KRX13947.1_T7	KRZ86769.1_T8	KRX53503.1_T9	KRY18445.1_T12	TP03320_T4	KRZ67414.1_T10	KRZ03450.1_T11
2918	EFV53404_T1	KRZ59705.1_T2	KRY47289.1_T3	KRX38383.1_T5	KRX70941.1_T6	KRX13945.1_T7	KRZ86737.1_T8	KRX53512.1_T9	KRY18456.1_T12	TP03318_T4	KRZ67421.1_T10	KRZ03454.1_T11
2919	EFV53411_T1	KRZ58164.1_T2	KRY53756.1_T3	KRX46352.1_T5	KRX85326.1_T6	KRX18328.1_T7	KRZ95709.1_T8	KRX67929.1_T9	KRY21701.1_T12	TP09845_T4	KRZ72835.1_T10	KRZ14459.1_T11
2920	EFV53421_T1	KRZ58143.1_T2	KRY53774.1_T3	KRX46359.1_T5	KRX85392.1_T6	KRX18313.1_T7	KRZ95686.1_T8	KRX68002.1_T9	KRY21748.1_T12	TP09852_T4	KRZ72814.1_T10	KRZ14507.1_T11
2921	EFV53424_T1	KRZ58171.1_T2	KRY53770.1_T3	KRX46385.1_T5	KRX85437.1_T6	KRX19099.1_T7	KRZ95704.1_T8	KRX68008.1_T9	KRY21670.1_T12	TP09853_T4	KRZ72824.1_T10	KRZ14489.1_T11
2922	EFV53425_T1	KRZ58167.1_T2	KRY53777.1_T3	KRX46356.1_T5	KRX85220.1_T6	KRX19115.1_T7	KRZ95744.1_T8	KRX68011.1_T9	KRY21653.1_T12	TP09854_T4	KRZ72815.1_T10	KRZ14454.1_T11
2923	EFV53426_T1	KRZ58133.1_T2	KRY53750.1_T3	KRX46383.1_T5	KRX85184.1_T6	KRX19131.1_T7	KRZ95696.1_T8	KRX67933.1_T9	KRY21696.1_T12	TP09855_T4	KRZ72871.1_T10	KRZ14468.1_T11
2924	EFV53432_T1	KRZ58139.1_T2	KRY53764.1_T3	KRX46363.1_T5	KRX85350.1_T6	KRX19111.1_T7	KRZ95611.1_T8	KRX68030.1_T9	KRY21655.1_T12	TP09858_T4	KRZ72812.1_T10	KRZ14532.1_T11
2925	EFV53433_T1	KRZ58170.1_T2	KRY53761.1_T3	KRX46380.1_T5	KRX85189.1_T6	KRX19137.1_T7	KRZ95638.1_T8	KRX67944.1_T9	KRY21659.1_T12	TP09859_T4	KRZ72852.1_T10	KRZ14476.1_T11
2926	EFV53446_T1	KRZ58178.1_T2	KRY53767.1_T3	KRX46381.1_T5	KRX85242.1_T6	KRX19129.1_T7	KRZ95569.1_T8	KRX67887.1_T9	KRY21736.1_T12	TP09868_T4	KRZ72825.1_T10	KRZ14449.1_T11
2927	EFV53459_T1	KRZ52205.1_T2	KRY56350.1_T3	KRX36524.1_T5	KRX73014.1_T6	KRX14595.1_T7	KRZ86039.1_T8	KRX68043.1_T9	KRY11713.1_T12	TP09343_T4	KRZ74479.1_T10	KRZ09859.1_T11
2928	EFV53466_T1	KRZ52199.1_T2	KRY56328.1_T3	KRX49699.1_T5	KRX73039.1_T6	KRX14605.1_T7	KRZ86075.1_T8	KRX67904.1_T9	KRY11691.1_T12	TP09335_T4	KRZ74428.1_T10	KRZ09819.1_T11
2929	EFV53467_T1	KRZ52203.1_T2	KRY56335.1_T3	KRX49739.1_T5	KRX73025.1_T6	KRX14606.1_T7	KRZ86081.1_T8	KRX68067.1_T9	KRY11711.1_T12	TP09334_T4	KRZ74417.1_T10	KRZ09850.1_T11
2930	EFV53476_T1	KRZ52212.1_T2	KRY56367.1_T3	KRX36522.1_T5	KRX73032.1_T6	KRX14584.1_T7	KRZ86080.1_T8	KRX68058.1_T9	KRY11693.1_T12	TP09346_T4	KRZ74465.1_T10	KRZ09848.1_T11
2931	EFV53483_T1	KRZ58536.1_T2	KRY56317.1_T3	KRX44120.1_T5	KRX75251.1_T6	KRX18337.1_T7	KRZ95595.1_T8	KRX64040.1_T9	KRY17770.1_T12	TP01619_T4	KRZ70232.1_T10	KRZ06060.1_T11
2932	EFV53489_T1	KRZ58555.1_T2	KRY56308.1_T3	KRX44150.1_T5	KRX75235.1_T6	KRX18359.1_T7	KRZ95661.1_T8	KRX64081.1_T9	KRY17817.1_T12	TP09369_T4	KRZ68497.1_T10	KRZ09829.1_T11
2933	EFV53490_T1	KRZ58545.1_T2	KRY56298.1_T3	KRX44125.1_T5	KRX75262.1_T6	KRX18329.1_T7	KRZ95703.1_T8	KRX64082.1_T9	KRY17780.1_T12	TP09368_T4	KRZ68506.1_T10	KRZ09838.1_T11
2935	EFV53496_T1	KRZ58543.1_T2	KRY56295.1_T3	KRX44148.1_T5	KRX75253.1_T6	KRX18335.1_T7	KRZ95623.1_T8	KRX64076.1_T9	KRY17791.1_T12	TP09364_T4	KRZ68520.1_T10	KRZ09806.1_T11
2936	EFV53497_T1	KRZ58559.1_T2	KRY56323.1_T3	KRX44136.1_T5	KRX75228.1_T6	KRX18341.1_T7	KRZ95649.1_T8	KRX64064.1_T9	KRY17820.1_T12	TP09361_T4	KRZ68519.1_T10	KRZ09867.1_T11
2937	EFV53498_T1	KRZ58577.1_T2	KRY56297.1_T3	KRX44164.1_T5	KRX75237.1_T6	KRX18319.1_T7	KRZ95605.1_T8	KRX64067.1_T9	KRY17804.1_T12	TP09360_T4	KRZ68524.1_T10	KRZ09842.1_T11
2938	EFV53501_T1	KRZ58560.1_T2	KRY56288.1_T3	KRX44158.1_T5	KRX75248.1_T6	KRX18316.1_T7	KRZ95730.1_T8	KRX64052.1_T9	KRY17801.1_T12	TP09355_T4	KRZ68511.1_T10	KRZ09857.1_T11
2939	EFV53510_T1	KRZ49305.1_T2	KRY45482.1_T3	KRX36306.1_T5	KRX83060.1_T6	KRX14409.1_T7	KRZ85092.1_T8	KRX54961.1_T9	KRY08397.1_T12	TP01615_T4	KRZ70207.1_T10	KRZ06057.1_T11
2940	EFV53519_T1	KRZ58020.1_T2	KRY52946.1_T3	KRX37107.1_T5	KRX83068.1_T6	KRX14414.1_T7	KRZ84197.1_T8	KRX54962.1_T9	KRY09862.1_T12	TP01596_T4	KRZ70222.1_T10	KRZ06037.1_T11
2941	EFV53523_T1	KRZ58043.1_T2	KRY52937.1_T3	KRX37104.1_T5	KRX83064.1_T6	KRX14410.1_T7	KRZ84217.1_T8	KRX54968.1_T9	KRY09860.1_T12	TP01600_T4	KRZ70198.1_T10	KRZ06069.1_T11
2942	EFV53535_T1	KRZ49304.1_T2	KRY52953.1_T3	KRX36294.1_T5	KRX83052.1_T6	KRX14431.1_T7	KRZ84208.1_T8	KRX54967.1_T9	KRY08785.1_T12	TP01607_T4	KRZ70203.1_T10	KRZ06042.1_T11
2944	EFV53549_T1	KRZ52968.1_T2	KRY56539.1_T3	KRX39886.1_T5	KRX81523.1_T6	KRX14899.1_T7	KRZ90762.1_T8	KRX55009.1_T9	KRY13258.1_T12	TP01201_T4	KRZ71025.1_T10	KRZ08537.1_T11
2945	EFV53550_T1	KRZ52981.1_T2	KRY56542.1_T3	KRX39884.1_T5	KRX81514.1_T6	KRX14920.1_T7	KRZ90741.1_T8	KRX54999.1_T9	KRY13262.1_T12	TP01200_T4	KRZ71050.1_T10	KRZ08524.1_T11
2946	EFV53560_T1	KRZ52970.1_T2	KRY56534.1_T3	KRX39876.1_T5	KRX81506.1_T6	KRX14912.1_T7	KRZ90784.1_T8	KRX55000.1_T9	KRY13240.1_T12	TP01194_T4	KRZ71041.1_T10	KRZ08511.1_T11
2947	EFV53561_T1	KRZ52959.1_T2	KRY56488.1_T3	KRX39880.1_T5	KRX81561.1_T6	KRX14913.1_T7	KRZ90764.1_T8	KRX55007.1_T9	KRY13248.1_T12	TP01192_T4	KRZ71040.1_T10	KRZ08543.1_T11
2948	EFV53562_T1	KRZ52973.1_T2	KRY56526.1_T3	KRX39875.1_T5	KRX81536.1_T6	KRX14905.1_T7	KRZ90733.1_T8	KRX54996.1_T9	KRY13267.1_T12	TP01191_T4	KRZ71048.1_T10	KRZ08546.1_T11
2949	EFV53565_T1	KRZ52967.1_T2	KRY56501.1_T3	KRX35752.1_T5	KRX81548.1_T6	KRX14922.1_T7	KRZ90743.1_T8	KRX54976.1_T9	KRY13237.1_T12	TP01190_T4	KRZ71052.1_T10	KRZ08532.1_T11
2950	EFV53568_T1	KRZ52953.1_T2	KRY56571.1_T3	KRX35755.1_T5	KRX81527.1_T6	KRX14919.1_T7	KRZ90756.1_T8	KRX54993.1_T9	KRY13236.1_T12	TP01189_T4	KRZ71068.1_T10	KRZ08530.1_T11
2951	EFV53576_T1	KRZ52982.1_T2	KRY56518.1_T3	KRX39869.1_T5	KRX81511.1_T6	KRX14906.1_T7	KRZ90752.1_T8	KRX54988.1_T9	KRY13264.1_T12	TP01207_T4	KRZ71054.1_T10	KRZ08513.1_T11
2952	EFV53592_T1	KRZ49417.1_T2	KRY46137.1_T3	KRX46146.1_T5	KRX70728.1_T6	KRX24649.1_T7	KRZ86040.1_T8	KRX54800.1_T9	KRY18495.1_T12	TP03867_T4	KRZ66348.1_T10	KRZ14453.1_T11
2956	EFV53622_T1	KRZ50544.1_T2	KRY47512.1_T3	KRX37192.1_T5	KRX71979.1_T6	KRX24626.1_T7	KRZ86756.1_T8	KRX54813.1_T9	KRY12501.1_T12	TP01740_T4	KRZ74457.1_T10	KRZ10505.1_T11
2957	EFV53623_T1	KRZ50535.1_T2	KRY47516.1_T3	KRX37213.1_T5	KRX71990.1_T6	KRX24702.1_T7	KRZ86738.1_T8	KRX54814.1_T9	KRY12518.1_T12	TP01739_T4	KRZ74451.1_T10	KRZ10467.1_T11
2958	EFV53632_T1	KRZ50530.1_T2	KRY47514.1_T3	KRX37200.1_T5	KRX71971.1_T6	KRX24659.1_T7	KRZ86739.1_T8	KRX54836.1_T9	KRY12525.1_T12	TP01733_T4	KRZ74467.1_T10	KRZ10474.1_T11
2959	EFV53634_T1	KRZ50547.1_T2	KRY47494.1_T3	KRX37209.1_T5	KRX71987.1_T6	KRX24721.1_T7	KRZ86733.1_T8	KRX54806.1_T9	KRY12507.1_T12	TP01732_T4	KRZ74486.1_T10	KRZ10462.1_T11
2960	EFV53645_T1	KRZ49732.1_T2	KRY46892.1_T3	KRX36915.1_T5	KRX70986.1_T6	KRX24708.1_T7	KRZ83454.1_T8	KRX67968.1_T9	KRY09677.1_T12	TP01748_T4	KRZ74461.1_T10	KRZ10497.1_T11
2961	EFV53649_T1	KRZ49725.1_T2	KRY46884.1_T3	KRX36917.1_T5	KRX70991.1_T6	KRX24657.1_T7	KRZ83462.1_T8	KRX68100.1_T9	KRY09669.1_T12	TP01745_T4	KRZ74469.1_T10	KRZ10475.1_T11
2962	EFV53654_T1	KRZ53573.1_T2	KRY54482.1_T3	KRX41241.1_T5	KRX80513.1_T6	KRX14886.1_T7	KRZ87002.1_T8	KRX68065.1_T9	KRY17238.1_T12	TP10659_T4	KRZ71531.1_T10	KRZ05111.1_T11
2963	EFV53658_T1	KRZ53568.1_T2	KRY54514.1_T3	KRX41232.1_T5	KRX80562.1_T6	KRX14889.1_T7	KRZ87016.1_T8	KRX67882.1_T9	KRY17217.1_T12	TP10654_T4	KRZ71546.1_T10	KRZ05122.1_T11
2964	EFV53664_T1	KRZ53562.1_T2	KRY54488.1_T3	KRX41223.1_T5	KRX80558.1_T6	KRX14872.1_T7	KRZ87011.1_T8	KRX68045.1_T9	KRY17199.1_T12	TP10649_T4	KRZ71550.1_T10	KRZ05099.1_T11
2966	EFV53707_T1	KRZ59442.1_T2	KRY48906.1_T3	KRX40684.1_T5	KRX80548.1_T6	KRX15111.1_T7	KRZ84690.1_T8	KRX67273.1_T9	KRY16156.1_T12	TP01279_T4	KRZ73577.1_T10	KRZ13537.1_T11
2967	EFV53711_T1	KRZ59443.1_T2	KRY48908.1_T3	KRX40680.1_T5	KRX80493.1_T6	KRX15119.1_T7	KRZ84687.1_T8	KRX67293.1_T9	KRY16160.1_T12	TP01276_T4	KRZ73607.1_T10	KRZ13567.1_T11
2968	EFV53713_T1	KRZ59439.1_T2	KRY48914.1_T3	KRX40678.1_T5	KRX80570.1_T6	KRX15125.1_T7	KRZ84669.1_T8	KRX67301.1_T9	KRY16143.1_T12	TP01274_T4	KRZ73564.1_T10	KRZ13545.1_T11
2969	EFV53723_T1	KRZ59379.1_T2	KRY48910.1_T3	KRX40673.1_T5	KRX80574.1_T6	KRX15124.1_T7	KRZ84686.1_T8	KRX67318.1_T9	KRY08204.1_T12	TP01269_T4	KRZ73606.1_T10	KRZ13577.1_T11
2970	EFV53731_T1	KRZ56414.1_T2	KRY48057.1_T3	KRX46655.1_T5	KRX74821.1_T6	KRX14294.1_T7	KRZ88069.1_T8	KRX67280.1_T9	KRY11402.1_T12	TP01309_T4	KRZ73598.1_T10	KRZ13548.1_T11
2971	EFV53734_T1	KRZ56423.1_T2	KRY48043.1_T3	KRX46627.1_T5	KRX74808.1_T6	KRX14302.1_T7	KRZ88113.1_T8	KRX67246.1_T9	KRY11409.1_T12	TP01305_T4	KRZ73597.1_T10	KRZ13539.1_T11
2972	EFV53741_T1	KRZ56438.1_T2	KRY48054.1_T3	KRX46656.1_T5	KRX74809.1_T6	KRX14286.1_T7	KRZ88100.1_T8	KRX67237.1_T9	KRY11413.1_T12	TP01298_T4	KRZ73610.1_T10	KRZ13603.1_T11
2973	EFV53746_T1	KRZ56409.1_T2	KRY48039.1_T3	KRX46636.1_T5	KRX74836.1_T6	KRX14298.1_T7	KRZ88079.1_T8	KRX67198.1_T9	KRY11423.1_T12	TP01291_T4	KRZ73590.1_T10	KRZ13582.1_T11
2974	EFV53757_T1	KRZ50273.1_T2	KRY45250.1_T3	KRX38830.1_T5	KRX71289.1_T6	KRX13772.1_T7	KRZ84125.1_T8	KRX65869.1_T9	KRY11352.1_T12	TP03045_T4	KRZ67315.1_T10	KRZ03167.1_T11
2975	EFV53758_T1	KRZ50276.1_T2	KRY45251.1_T3	KRX38832.1_T5	KRX71293.1_T6	KRX13783.1_T7	KRZ84146.1_T8	KRX65796.1_T9	KRY11357.1_T12	TP03046_T4	KRZ67324.1_T10	KRZ03165.1_T11
2976	EFV53761_T1	KRZ50290.1_T2	KRY53378.1_T3	KRX38838.1_T5	KRX71299.1_T6	KRX13782.1_T7	KRZ84137.1_T8	KRX65913.1_T9	KRY11365.1_T12	TP03050_T4	KRZ67319.1_T10	KRZ03162.1_T11
2977	EFV53763_T1	KRZ50285.1_T2	KRY53369.1_T3	KRX38827.1_T5	KRX71296.1_T6	KRX13769.1_T7	KRZ84128.1_T8	KRX65823.1_T9	KRY11349.1_T12	TP03051_T4	KRZ67322.1_T10	KRZ03155.1_T11
2978	EFV53766_T1	KRZ50277.1_T2	KRY53383.1_T3	KRX38824.1_T5	KRX71291.1_T6	KRX13777.1_T7	KRZ84132.1_T8	KRX65877.1_T9	KRY11348.1_T12	TP03052_T4	KRZ67333.1_T10	KRZ03159.1_T11
2979	EFV53767_T1	KRZ50274.1_T2	KRY53362.1_T3	KRX38843.1_T5	KRX71294.1_T6	KRX13779.1_T7	KRZ84124.1_T8	KRX65831.1_T9	KRY11351.1_T12	TP03054_T4	KRZ67321.1_T10	KRZ03160.1_T11
2980	EFV53768_T1	KRZ50287.1_T2	KRY53388.1_T3	KRX38841.1_T5	KRX71308.1_T6	KRX13784.1_T7	KRZ84142.1_T8	KRX65839.1_T9	KRY11353.1_T12	TP03055_T4	KRZ67325.1_T10	KRZ03163.1_T11
2981	EFV53769_T1	KRZ50283.1_T2	KRY53391.1_T3	KRX38836.1_T5	KRX71292.1_T6	KRX13766.1_T7	KRZ84149.1_T8	KRX65927.1_T9	KRY11362.1_T12	TP03056_T4	KRZ67328.1_T10	KRZ03152.1_T11
2982	EFV53775_T1	KRZ60593.1_T2	KRY54083.1_T3	KRX40569.1_T5	KRX72993.1_T6	KRX14491.1_T7	KRZ94262.1_T8	KRX65741.1_T9	KRY12479.1_T12	TP02566_T4	KRZ75329.1_T10	KRZ04395.1_T11
2983	EFV53776_T1	KRZ60615.1_T2	KRY54075.1_T3	KRX40574.1_T5	KRX72984.1_T6	KRX14479.1_T7	KRZ94389.1_T8	KRX65726.1_T9	KRY12474.1_T12	TP02565_T4	KRZ75349.1_T10	KRZ04422.1_T11
2984	EFV53778_T1	KRZ60590.1_T2	KRY54076.1_T3	KRX40573.1_T5	KRX72997.1_T6	KRX14488.1_T7	KRZ94360.1_T8	KRX65745.1_T9	KRY12458.1_T12	TP02562_T4	KRZ75372.1_T10	KRZ04413.1_T11
2985	EFV53805_T1	KRZ60596.1_T2	KRY54071.1_T3	KRX43185.1_T5	KRX77416.1_T6	KRX21281.1_T7	KRZ94313.1_T8	KRX52148.1_T9	KRY13056.1_T12	TP01334_T4	KRZ66038.1_T10	KRZ05050.1_T11
2986	EFV53812_T1	KRZ60648.1_T2	KRY54031.1_T3	KRX43190.1_T5	KRX77432.1_T6	KRX21298.1_T7	KRZ94357.1_T8	KRX55932.1_T9	KRY13055.1_T12	TP01330_T4	KRZ75175.1_T10	KRZ05061.1_T11
2987	EFV53817_T1	KRZ60628.1_T2	KRY54053.1_T3	KRX43193.1_T5	KRX77422.1_T6	KRX21319.1_T7	KRZ94337.1_T8	KRX55925.1_T9	KRY13053.1_T12	TP01326_T4	KRZ75181.1_T10	KRZ05063.1_T11
2988	EFV53823_T1	KRZ60599.1_T2	KRY54049.1_T3	KRX43177.1_T5	KRX77411.1_T6	KRX21325.1_T7	KRZ94356.1_T8	KRX55933.1_T9	KRY13051.1_T12	TP01321_T4	KRZ75197.1_T10	KRZ05056.1_T11
2989	EFV53832_T1	KRZ60573.1_T2	KRY46716.1_T3	KRX35890.1_T5	KRX77397.1_T6	KRX21332.1_T7	KRZ94268.1_T8	KRX55918.1_T9	KRY13073.1_T12	TP01313_T4	KRZ75205.1_T10	KRZ05073.1_T11
2990	EFV53840_T1	KRZ60653.1_T2	KRY46836.1_T3	KRX48201.1_T5	KRX77380.1_T6	KRX15376.1_T7	KRZ85189.1_T8	KRX67873.1_T9	KRY16857.1_T12	TP01349_T4	KRZ66850.1_T10	KRZ07554.1_T11
2991	EFV53844_T1	KRZ60658.1_T2	KRY46843.1_T3	KRX48231.1_T5	KRX77418.1_T6	KRX15400.1_T7	KRZ85188.1_T8	KRX68025.1_T9	KRY16890.1_T12	TP01344_T4	KRZ66835.1_T10	KRZ07560.1_T11
2992	EFV53855_T1	KRZ62618.1_T2	KRY58238.1_T3	KRX47259.1_T5	KRX81252.1_T6	KRX21273.1_T7	KRZ89692.1_T8	KRX59146.1_T9	KRY19527.1_T12	TP01419_T4	KRZ70263.1_T10	KRZ09077.1_T11
2993	EFV53860_T1	KRZ62687.1_T2	KRY58212.1_T3	KRX47292.1_T5	KRX81228.1_T6	KRX21329.1_T7	KRZ89661.1_T8	KRX59114.1_T9	KRY19523.1_T12	TP01422_T4	KRZ70244.1_T10	KRZ09118.1_T11
2994	EFV53862_T1	KRZ62690.1_T2	KRY58204.1_T3	KRX47260.1_T5	KRX81194.1_T6	KRX21314.1_T7	KRZ89683.1_T8	KRX59173.1_T9	KRY19545.1_T12	TP01424_T4	KRZ72058.1_T10	KRZ09073.1_T11
2995	EFV53867_T1	KRZ62640.1_T2	KRY58171.1_T3	KRX47249.1_T5	KRX81237.1_T6	KRX21309.1_T7	KRZ89665.1_T8	KRX59125.1_T9	KRY19519.1_T12	TP01426_T4	KRZ72025.1_T10	KRZ09055.1_T11
2996	EFV53868_T1	KRZ62666.1_T2	KRY58233.1_T3	KRX47255.1_T5	KRX81260.1_T6	KRX21345.1_T7	KRZ89655.1_T8	KRX59157.1_T9	KRY19595.1_T12	TP01427_T4	KRZ72048.1_T10	KRZ09111.1_T11
2997	EFV53872_T1	KRZ62627.1_T2	KRY58240.1_T3	KRX47268.1_T5	KRX81196.1_T6	KRX21323.1_T7	KRZ89714.1_T8	KRX59175.1_T9	KRY19592.1_T12	TP01431_T4	KRZ72033.1_T10	KRZ09059.1_T11
2998	EFV53873_T1	KRZ62602.1_T2	KRY58218.1_T3	KRX47257.1_T5	KRX81246.1_T6	KRX21337.1_T7	KRZ89701.1_T8	KRX59124.1_T9	KRY19548.1_T12	TP01430_T4	KRZ72057.1_T10	KRZ09094.1_T11
2999	EFV53874_T1	KRZ62634.1_T2	KRY58154.1_T3	KRX47282.1_T5	KRX81221.1_T6	KRX21295.1_T7	KRZ89691.1_T8	KRX59169.1_T9	KRY19576.1_T12	TP01432_T4	KRZ72031.1_T10	KRZ09119.1_T11
3000	EFV53877_T1	KRZ62641.1_T2	KRY58216.1_T3	KRX47266.1_T5	KRX81259.1_T6	KRX21377.1_T7	KRZ89715.1_T8	KRX59164.1_T9	KRY19582.1_T12	TP01434_T4	KRZ72060.1_T10	KRZ09089.1_T11
3001	EFV53882_T1	KRZ62681.1_T2	KRY58183.1_T3	KRX47261.1_T5	KRX81258.1_T6	KRX21302.1_T7	KRZ89659.1_T8	KRX59128.1_T9	KRY19557.1_T12	TP04116_T4	KRZ72049.1_T10	KRZ09058.1_T11
3002	EFV53883_T1	KRZ62678.1_T2	KRY58190.1_T3	KRX47291.1_T5	KRX81241.1_T6	KRX21362.1_T7	KRZ89694.1_T8	KRX59174.1_T9	KRY19532.1_T12	TP04118_T4	KRZ72061.1_T10	KRZ09095.1_T11
3003	EFV53884_T1	KRZ62667.1_T2	KRY58186.1_T3	KRX47270.1_T5	KRX81191.1_T6	KRX21370.1_T7	KRZ89690.1_T8	KRX59163.1_T9	KRY19539.1_T12	TP04119_T4	KRZ72051.1_T10	KRZ09062.1_T11
3004	EFV53885_T1	KRZ62652.1_T2	KRY58188.1_T3	KRX47283.1_T5	KRX81262.1_T6	KRX21355.1_T7	KRZ89685.1_T8	KRX59123.1_T9	KRY19558.1_T12	TP04120_T4	KRZ72055.1_T10	KRZ09072.1_T11
3005	EFV53888_T1	KRZ62670.1_T2	KRY58206.1_T3	KRX47288.1_T5	KRX81210.1_T6	KRX21317.1_T7	KRZ89650.1_T8	KRX59111.1_T9	KRY19578.1_T12	TP04122_T4	KRZ72042.1_T10	KRZ09081.1_T11
3006	EFV53889_T1	KRZ62689.1_T2	KRY58192.1_T3	KRX47267.1_T5	KRX81192.1_T6	KRX21282.1_T7	KRZ89666.1_T8	KRX59110.1_T9	KRY19588.1_T12	TP02970_T4	KRZ72054.1_T10	KRZ09088.1_T11
3007	EFV53890_T1	KRZ62674.1_T2	KRY58193.1_T3	KRX47280.1_T5	KRX81227.1_T6	KRX21318.1_T7	KRZ89698.1_T8	KRX59172.1_T9	KRY19577.1_T12	TP02969_T4	KRZ72026.1_T10	KRZ09056.1_T11
3008	EFV53891_T1	KRZ62668.1_T2	KRY58242.1_T3	KRX47258.1_T5	KRX81197.1_T6	KRX21343.1_T7	KRZ89663.1_T8	KRX59141.1_T9	KRY19579.1_T12	TP02968_T4	KRZ72035.1_T10	KRZ09096.1_T11
3009	EFV53892_T1	KRZ62703.1_T2	KRY58252.1_T3	KRX47295.1_T5	KRX81239.1_T6	KRX21357.1_T7	KRZ89687.1_T8	KRX59162.1_T9	KRY19543.1_T12	TP02967_T4	KRZ72021.1_T10	KRZ09086.1_T11
3010	EFV53897_T1	KRZ62676.1_T2	KRY58201.1_T3	KRX47293.1_T5	KRX81202.1_T6	KRX21372.1_T7	KRZ89653.1_T8	KRX59115.1_T9	KRY19524.1_T12	TP02962_T4	KRZ72063.1_T10	KRZ01966.1_T11
3011	EFV53906_T1	KRZ63267.1_T2	KRY48588.1_T3	KRX40333.1_T5	KRX85210.1_T6	KRX16299.1_T7	KRZ84754.1_T8	KRX54034.1_T9	KRY19587.1_T12	TP01383_T4	KRZ65903.1_T10	KRZ05022.1_T11
3012	EFV53907_T1	KRZ63288.1_T2	KRY48597.1_T3	KRX40323.1_T5	KRX85185.1_T6	KRX16254.1_T7	KRZ84740.1_T8	KRX54021.1_T9	KRY19569.1_T12	TP01385_T4	KRZ65912.1_T10	KRZ05016.1_T11
3013	EFV53909_T1	KRZ63197.1_T2	KRY48596.1_T3	KRX40342.1_T5	KRX85362.1_T6	KRX16266.1_T7	KRZ84750.1_T8	KRX54042.1_T9	KRY19518.1_T12	TP01391_T4	KRZ67289.1_T10	KRZ05019.1_T11
3014	EFV53911_T1	KRZ63235.1_T2	KRY48591.1_T3	KRX40330.1_T5	KRX85425.1_T6	KRX16273.1_T7	KRZ84742.1_T8	KRX54008.1_T9	KRY19512.1_T12	TP01394_T4	KRZ67288.1_T10	KRZ05007.1_T11
3015	EFV53915_T1	KRZ63163.1_T2	KRY48583.1_T3	KRX40335.1_T5	KRX85448.1_T6	KRX21339.1_T7	KRZ84733.1_T8	KRX54036.1_T9	KRY19521.1_T12	TP01405_T4	KRZ67275.1_T10	KRZ05036.1_T11
3016	EFV53916_T1	KRZ63191.1_T2	KRY48582.1_T3	KRX40341.1_T5	KRX85396.1_T6	KRX21364.1_T7	KRZ84747.1_T8	KRX54044.1_T9	KRY19550.1_T12	TP01406_T4	KRZ67279.1_T10	KRZ05005.1_T11
3017	EFV53917_T1	KRZ63190.1_T2	KRY48581.1_T3	KRX40327.1_T5	KRX85209.1_T6	KRX21305.1_T7	KRZ84749.1_T8	KRX54045.1_T9	KRY19528.1_T12	TP01407_T4	KRZ67309.1_T10	KRZ05035.1_T11
3018	EFV53919_T1	KRZ63261.1_T2	KRY48587.1_T3	KRX40331.1_T5	KRX85435.1_T6	KRX21367.1_T7	KRZ84739.1_T8	KRX54019.1_T9	KRY19571.1_T12	TP01410_T4	KRZ67304.1_T10	KRZ05009.1_T11
3019	EFV53920_T1	KRZ63184.1_T2	KRY48586.1_T3	KRX40345.1_T5	KRX85246.1_T6	KRX21289.1_T7	KRZ84752.1_T8	KRX54015.1_T9	KRY19536.1_T12	TP01411_T4	KRZ67291.1_T10	KRZ05029.1_T11
3020	EFV53921_T1	KRZ63295.1_T2	KRY48601.1_T3	KRX40317.1_T5	KRX85270.1_T6	KRX21296.1_T7	KRZ84745.1_T8	KRX54031.1_T9	KRY19529.1_T12	TP01412_T4	KRZ67285.1_T10	KRZ04996.1_T11
3021	EFV53922_T1	KRZ63244.1_T2	KRY48606.1_T3	KRX40314.1_T5	KRX85411.1_T6	KRX21346.1_T7	KRZ84738.1_T8	KRX54027.1_T9	KRY19526.1_T12	TP01413_T4	KRZ67308.1_T10	KRZ05006.1_T11
3022	EFV53931_T1	KRZ59160.1_T2	KRY55343.1_T3	KRX48304.1_T5	KRX73340.1_T6	KRX26398.1_T7	KRZ89848.1_T8	KRX67260.1_T9	KRY11667.1_T12	TP01369_T4	KRZ72399.1_T10	KRZ07555.1_T11
3023	EFV53933_T1	KRZ59152.1_T2	KRY55337.1_T3	KRX48255.1_T5	KRX73344.1_T6	KRX26468.1_T7	KRZ89816.1_T8	KRX67254.1_T9	KRY11683.1_T12	TP01368_T4	KRZ72412.1_T10	KRZ07568.1_T11
3024	EFV53944_T1	KRZ59195.1_T2	KRY55296.1_T3	KRX48302.1_T5	KRX73336.1_T6	KRX26370.1_T7	KRZ89822.1_T8	KRX67210.1_T9	KRY11676.1_T12	TP01361_T4	KRZ72409.1_T10	KRZ07544.1_T11
3025	EFV53945_T1	KRZ59163.1_T2	KRY55324.1_T3	KRX48252.1_T5	KRX73330.1_T6	KRX26402.1_T7	KRZ89808.1_T8	KRX67285.1_T9	KRY11666.1_T12	TP01360_T4	KRZ72436.1_T10	KRZ07558.1_T11
3026	EFV53947_T1	KRZ59148.1_T2	KRY49179.1_T3	KRX48279.1_T5	KRX73341.1_T6	KRX26576.1_T7	KRZ89836.1_T8	KRX67265.1_T9	KRY11677.1_T12	TP01356_T4	KRZ72385.1_T10	KRZ07541.1_T11
3028	EFV53953_T1	KRZ59146.1_T2	KRY52095.1_T3	KRX48285.1_T5	KRX82098.1_T6	KRX26497.1_T7	KRZ89784.1_T8	KRX67231.1_T9	KRY13458.1_T12	TP00970_T4	KRZ73304.1_T10	KRZ06114.1_T11
3029	EFV53956_T1	KRZ59180.1_T2	KRY52100.1_T3	KRX48249.1_T5	KRX82177.1_T6	KRX26472.1_T7	KRZ89828.1_T8	KRX67164.1_T9	KRY13426.1_T12	TP00972_T4	KRZ73307.1_T10	KRZ06110.1_T11
3030	EFV53961_T1	KRZ59142.1_T2	KRY52091.1_T3	KRX48282.1_T5	KRX82115.1_T6	KRX26548.1_T7	KRZ89804.1_T8	KRX67197.1_T9	KRY13429.1_T12	TP00978_T4	KRZ73334.1_T10	KRZ06099.1_T11
3031	EFV53962_T1	KRZ59191.1_T2	KRY52127.1_T3	KRX48266.1_T5	KRX82143.1_T6	KRX26456.1_T7	KRZ89837.1_T8	KRX67289.1_T9	KRY13448.1_T12	TP00979_T4	KRZ73338.1_T10	KRZ06132.1_T11
3034	EFV53972_T1	KRZ59153.1_T2	KRY52096.1_T3	KRX48275.1_T5	KRX82078.1_T6	KRX26485.1_T7	KRZ89817.1_T8	KRX67225.1_T9	KRY13419.1_T12	TP00992_T4	KRZ67547.1_T10	KRZ06140.1_T11
3035	EFV53988_T1	KRZ55448.1_T2	KRY48876.1_T3	KRX37932.1_T5	KRX78098.1_T6	KRX13619.1_T7	KRZ91337.1_T8	KRX65767.1_T9	KRY12245.1_T12	TP03559_T4	KRZ77256.1_T10	KRZ08642.1_T11
3037	EFV54001_T1	KRZ53609.1_T2	KRY57747.1_T3	KRX42017.1_T5	KRX74569.1_T6	KRX20558.1_T7	KRZ90530.1_T8	KRX67228.1_T9	KRY12682.1_T12	TP01535_T4	KRZ71632.1_T10	KRZ09935.1_T11
3038	EFV54005_T1	KRZ53611.1_T2	KRY57695.1_T3	KRX41999.1_T5	KRX74581.1_T6	KRX20594.1_T7	KRZ90520.1_T8	KRX67235.1_T9	KRY12664.1_T12	TP01532_T4	KRZ71638.1_T10	KRZ09926.1_T11
3039	EFV54008_T1	KRZ53622.1_T2	KRY57716.1_T3	KRX42005.1_T5	KRX74562.1_T6	KRX20604.1_T7	KRZ90511.1_T8	KRX67188.1_T9	KRY12666.1_T12	TP01531_T4	KRZ71598.1_T10	KRZ09941.1_T11
3040	EFV54009_T1	KRZ53628.1_T2	KRY57746.1_T3	KRX42002.1_T5	KRX74570.1_T6	KRX20563.1_T7	KRZ90524.1_T8	KRX67194.1_T9	KRY12673.1_T12	TP01530_T4	KRZ71615.1_T10	KRZ09936.1_T11
3041	EFV54010_T1	KRZ53627.1_T2	KRY57726.1_T3	KRX42000.1_T5	KRX74567.1_T6	KRX20575.1_T7	KRZ90540.1_T8	KRX67317.1_T9	KRY12658.1_T12	TP01529_T4	KRZ71640.1_T10	KRZ09934.1_T11
3042	EFV54015_T1	KRZ53612.1_T2	KRY57752.1_T3	KRX42010.1_T5	KRX74558.1_T6	KRX20552.1_T7	KRZ90528.1_T8	KRX67331.1_T9	KRY12655.1_T12	TP01527_T4	KRZ71596.1_T10	KRZ09939.1_T11
3043	EFV54019_T1	KRZ53621.1_T2	KRY57745.1_T3	KRX42019.1_T5	KRX74566.1_T6	KRX20633.1_T7	KRZ90495.1_T8	KRX67180.1_T9	KRY12681.1_T12	TP01523_T4	KRZ71609.1_T10	KRZ09931.1_T11
3044	EFV54021_T1	KRZ53608.1_T2	KRY57679.1_T3	KRX42012.1_T5	KRX74572.1_T6	KRX20588.1_T7	KRZ90518.1_T8	KRX67295.1_T9	KRY12671.1_T12	TP01522_T4	KRZ71624.1_T10	KRZ09916.1_T11
3045	EFV54023_T1	KRZ53610.1_T2	KRY57749.1_T3	KRX42020.1_T5	KRX74563.1_T6	KRX20599.1_T7	KRZ90510.1_T8	KRX67226.1_T9	KRY12679.1_T12	TP01521_T4	KRZ71630.1_T10	KRZ09901.1_T11
3046	EFV54038_T1	KRZ51684.1_T2	KRY48849.1_T3	KRX40112.1_T5	KRX78049.1_T6	KRX15375.1_T7	KRZ88795.1_T8	KRX54247.1_T9	KRY16853.1_T12	TP02292_T4	KRZ69799.1_T10	KRZ03977.1_T11
3047	EFV54042_T1	KRZ51678.1_T2	KRY48844.1_T3	KRX40100.1_T5	KRX78075.1_T6	KRX15373.1_T7	KRZ88803.1_T8	KRX54235.1_T9	KRY16879.1_T12	TP02295_T4	KRZ69790.1_T10	KRZ03985.1_T11
3048	EFV54043_T1	KRZ51673.1_T2	KRY48839.1_T3	KRX40115.1_T5	KRX78099.1_T6	KRX15363.1_T7	KRZ88790.1_T8	KRX54240.1_T9	KRY16877.1_T12	TP02296_T4	KRZ69812.1_T10	KRZ03975.1_T11
3049	EFV54045_T1	KRZ51669.1_T2	KRY48840.1_T3	KRX40113.1_T5	KRX78046.1_T6	KRX15354.1_T7	KRZ88810.1_T8	KRX54246.1_T9	KRY16867.1_T12	TP02297_T4	KRZ69786.1_T10	KRZ03984.1_T11
3050	EFV54047_T1	KRZ51680.1_T2	KRY48852.1_T3	KRX40111.1_T5	KRX78102.1_T6	KRX15355.1_T7	KRZ88791.1_T8	KRX54238.1_T9	KRY16866.1_T12	TP02298_T4	KRZ69791.1_T10	KRZ03981.1_T11
3051	EFV54048_T1	KRZ51681.1_T2	KRY48842.1_T3	KRX40108.1_T5	KRX78100.1_T6	KRX15356.1_T7	KRZ88797.1_T8	KRX54249.1_T9	KRY16893.1_T12	TP02300_T4	KRZ69789.1_T10	KRZ03973.1_T11
3052	EFV54074_T1	KRZ55636.1_T2	KRY52277.1_T3	KRX46072.1_T5	KRX82065.1_T6	KRX15349.1_T7	KRZ94382.1_T8	KRX65649.1_T9	KRY17798.1_T12	TP09301_T4	KRZ68447.1_T10	KRZ04449.1_T11
3053	EFV54076_T1	KRZ55596.1_T2	KRY52288.1_T3	KRX46035.1_T5	KRX82074.1_T6	KRX15342.1_T7	KRZ94296.1_T8	KRX65728.1_T9	KRY17764.1_T12	TP09307_T4	KRZ68430.1_T10	KRZ04440.1_T11
3054	EFV54079_T1	KRZ55628.1_T2	KRY52276.1_T3	KRX46073.1_T5	KRX82134.1_T6	KRX15337.1_T7	KRZ94277.1_T8	KRX65716.1_T9	KRY17766.1_T12	TP09308_T4	KRZ68442.1_T10	KRZ04444.1_T11
3056	EFV54093_T1	KRZ55611.1_T2	KRY52269.1_T3	KRX46067.1_T5	KRX82168.1_T6	KRX15339.1_T7	KRZ94362.1_T8	KRX65682.1_T9	KRY17777.1_T12	TP09289_T4	KRZ68432.1_T10	KRZ04453.1_T11
3057	EFV54094_T1	KRZ55623.1_T2	KRY52275.1_T3	KRX46039.1_T5	KRX82148.1_T6	KRX15305.1_T7	KRZ94353.1_T8	KRX65641.1_T9	KRY17776.1_T12	TP09290_T4	KRZ68452.1_T10	KRZ04450.1_T11
3058	EFV54096_T1	KRZ55617.1_T2	KRY52281.1_T3	KRX46032.1_T5	KRX82160.1_T6	KRX15348.1_T7	KRZ94276.1_T8	KRX65693.1_T9	KRY17788.1_T12	TP09294_T4	KRZ68428.1_T10	KRZ04446.1_T11
3059	EFV54097_T1	KRZ55639.1_T2	KRY52267.1_T3	KRX46038.1_T5	KRX82117.1_T6	KRX15343.1_T7	KRZ94390.1_T8	KRX65732.1_T9	KRY17783.1_T12	TP09295_T4	KRZ68451.1_T10	KRZ04443.1_T11
3060	EFV54103_T1	KRZ49760.1_T2	KRY48873.1_T3	KRX36172.1_T5	KRX78066.1_T6	KRX15385.1_T7	KRZ91340.1_T8	KRX65722.1_T9	KRY12251.1_T12	TP04157_T4	KRZ69813.1_T10	KRZ02091.1_T11
3061	EFV54104_T1	KRZ49756.1_T2	KRY48858.1_T3	KRX36173.1_T5	KRX78064.1_T6	KRX15401.1_T7	KRZ91309.1_T8	KRX65771.1_T9	KRY12242.1_T12	TP04155_T4	KRZ69805.1_T10	KRZ02085.1_T11
3062	EFV54128_T1	KRZ59722.1_T2	KRY48027.1_T3	KRX39466.1_T5	KRX85257.1_T6	KRX22333.1_T7	KRZ86175.1_T8	KRX60210.1_T9	KRY14132.1_T12	TP09269_T4	KRZ69329.1_T10	KRZ15408.1_T11
3063	EFV54129_T1	KRZ59688.1_T2	KRY48019.1_T3	KRX39470.1_T5	KRX85303.1_T6	KRX22385.1_T7	KRZ86170.1_T8	KRX60241.1_T9	KRY14168.1_T12	TP09270_T4	KRZ69309.1_T10	KRZ15395.1_T11
3064	EFV54131_T1	KRZ59718.1_T2	KRY48013.1_T3	KRX39474.1_T5	KRX85231.1_T6	KRX22312.1_T7	KRZ86196.1_T8	KRX60254.1_T9	KRY14143.1_T12	TP09271_T4	KRZ69314.1_T10	KRZ15417.1_T11
3065	EFV54132_T1	KRZ59745.1_T2	KRY48037.1_T3	KRX39471.1_T5	KRX85398.1_T6	KRX22367.1_T7	KRZ86205.1_T8	KRX60244.1_T9	KRY14147.1_T12	TP09273_T4	KRZ69288.1_T10	KRZ15333.1_T11
3066	EFV54136_T1	KRZ59697.1_T2	KRY48035.1_T3	KRX39469.1_T5	KRX85254.1_T6	KRX22394.1_T7	KRZ86186.1_T8	KRX60219.1_T9	KRY14167.1_T12	TP09276_T4	KRZ69290.1_T10	KRZ15411.1_T11
3067	EFV54149_T1	KRZ59713.1_T2	KRY52111.1_T3	KRX36795.1_T5	KRX85228.1_T6	KRX22377.1_T7	KRZ86195.1_T8	KRX60234.1_T9	KRY14144.1_T12	TP09264_T4	KRZ69316.1_T10	KRZ15351.1_T11
3068	EFV54150_T1	KRZ59740.1_T2	KRY48017.1_T3	KRX39464.1_T5	KRX85203.1_T6	KRX22320.1_T7	KRZ86189.1_T8	KRX60221.1_T9	KRY14145.1_T12	TP09265_T4	KRZ69306.1_T10	KRZ15396.1_T11
3069	EFV54164_T1	KRZ63194.1_T2	KRY57713.1_T3	KRX40873.1_T5	KRX85324.1_T6	KRX22400.1_T7	KRZ94305.1_T8	KRX54362.1_T9	KRY21546.1_T12	TP02342_T4	KRZ66335.1_T10	KRZ10223.1_T11
3070	EFV54165_T1	KRZ63219.1_T2	KRY57696.1_T3	KRX40884.1_T5	KRX85457.1_T6	KRX22406.1_T7	KRZ94256.1_T8	KRX54347.1_T9	KRY21638.1_T12	TP02343_T4	KRZ66332.1_T10	KRZ10233.1_T11
3071	EFV54168_T1	KRZ63283.1_T2	KRY57740.1_T3	KRX40880.1_T5	KRX85289.1_T6	KRX22357.1_T7	KRZ94331.1_T8	KRX54365.1_T9	KRY21559.1_T12	TP02346_T4	KRZ66340.1_T10	KRZ10216.1_T11
3072	EFV54169_T1	KRZ63195.1_T2	KRY57663.1_T3	KRX40874.1_T5	KRX85375.1_T6	KRX22299.1_T7	KRZ94244.1_T8	KRX54343.1_T9	KRY21528.1_T12	TP02348_T4	KRZ66333.1_T10	KRZ10263.1_T11
3073	EFV54171_T1	KRZ63205.1_T2	KRY57725.1_T3	KRX40887.1_T5	KRX85340.1_T6	KRX22396.1_T7	KRZ94349.1_T8	KRX54351.1_T9	KRY21531.1_T12	TP02350_T4	KRZ66343.1_T10	KRZ10271.1_T11
3074	EFV54173_T1	KRZ63285.1_T2	KRY57687.1_T3	KRX40879.1_T5	KRX85366.1_T6	KRX22395.1_T7	KRZ94317.1_T8	KRX54367.1_T9	KRY21583.1_T12	TP02352_T4	KRZ66336.1_T10	KRZ10254.1_T11
3075	EFV54174_T1	KRZ63170.1_T2	KRY57680.1_T3	KRX40877.1_T5	KRX85192.1_T6	KRX22344.1_T7	KRZ94386.1_T8	KRX54345.1_T9	KRY21578.1_T12	TP02353_T4	KRZ66334.1_T10	KRZ10224.1_T11
3076	EFV54183_T1	KRZ63238.1_T2	KRY57755.1_T3	KRX40870.1_T5	KRX85321.1_T6	KRX22382.1_T7	KRZ94308.1_T8	KRX54344.1_T9	KRY21558.1_T12	TP02358_T4	KRZ77264.1_T10	KRZ10231.1_T11
3077	EFV54185_T1	KRZ63222.1_T2	KRY53521.1_T3	KRX50958.1_T5	KRX85296.1_T6	KRX22290.1_T7	KRZ83846.1_T8	KRX57720.1_T9	KRY21549.1_T12	TP11054_T4	KRZ78836.1_T10	KRZ12556.1_T11
3078	EFV54191_T1	KRZ63177.1_T2	KRY53515.1_T3	KRX50938.1_T5	KRX85275.1_T6	KRX22283.1_T7	KRZ83848.1_T8	KRX57725.1_T9	KRY21627.1_T12	TP11048_T4	KRZ78736.1_T10	KRZ12552.1_T11
3079	EFV54193_T1	KRZ63168.1_T2	KRY53533.1_T3	KRX50983.1_T5	KRX85444.1_T6	KRX22304.1_T7	KRZ83855.1_T8	KRX57685.1_T9	KRY21561.1_T12	TP11046_T4	KRZ78744.1_T10	KRZ12592.1_T11
3080	EFV54224_T1	KRZ58550.1_T2	KRY52475.1_T3	KRX50902.1_T5	KRX85186.1_T6	KRX20555.1_T7	KRZ90529.1_T8	KRX57216.1_T9	KRY21624.1_T12	TP12062_T4	KRZ77212.1_T10	KRZ10255.1_T11
3081	EFV54230_T1	KRZ58563.1_T2	KRY52514.1_T3	KRX50915.1_T5	KRX85413.1_T6	KRX20562.1_T7	KRZ90555.1_T8	KRX57247.1_T9	KRY21610.1_T12	TP12065_T4	KRZ77236.1_T10	KRZ10220.1_T11
3082	EFV54231_T1	KRZ58551.1_T2	KRY52503.1_T3	KRX50901.1_T5	KRX85342.1_T6	KRX20640.1_T7	KRZ90525.1_T8	KRX57226.1_T9	KRY21590.1_T12	TP12066_T4	KRZ77231.1_T10	KRZ10250.1_T11
3083	EFV54236_T1	KRZ58541.1_T2	KRY52486.1_T3	KRX50988.1_T5	KRX85319.1_T6	KRX20549.1_T7	KRZ90548.1_T8	KRX57223.1_T9	KRY21555.1_T12	TP12071_T4	KRZ77238.1_T10	KRZ10281.1_T11
3084	EFV54238_T1	KRZ58583.1_T2	KRY52510.1_T3	KRX50964.1_T5	KRX85345.1_T6	KRX20584.1_T7	KRZ90563.1_T8	KRX57230.1_T9	KRY21612.1_T12	TP12073_T4	KRZ77203.1_T10	KRZ10222.1_T11
3085	EFV54239_T1	KRZ58578.1_T2	KRY52506.1_T3	KRX51020.1_T5	KRX85208.1_T6	KRX20609.1_T7	KRZ90535.1_T8	KRX57224.1_T9	KRY21534.1_T12	TP12074_T4	KRZ77261.1_T10	KRZ10260.1_T11
3086	EFV54240_T1	KRZ58593.1_T2	KRY52478.1_T3	KRX50956.1_T5	KRX85417.1_T6	KRX20578.1_T7	KRZ90544.1_T8	KRX57229.1_T9	KRY21569.1_T12	TP12076_T4	KRZ77216.1_T10	KRZ10262.1_T11
3087	EFV54241_T1	KRZ58572.1_T2	KRY52476.1_T3	KRX50987.1_T5	KRX85269.1_T6	KRX20618.1_T7	KRZ90501.1_T8	KRX57244.1_T9	KRY21585.1_T12	TP12077_T4	KRZ77221.1_T10	KRZ10261.1_T11
3088	EFV54261_T1	KRZ58123.1_T2	KRY49144.1_T3	KRX41050.1_T5	KRX73721.1_T6	KRX20567.1_T7	KRZ86431.1_T8	KRX63324.1_T9	KRY20525.1_T12	TP05932_T4	KRZ77196.1_T10	KRZ09890.1_T11
3089	EFV54262_T1	KRZ58092.1_T2	KRY49154.1_T3	KRX41057.1_T5	KRX73719.1_T6	KRX20598.1_T7	KRZ86407.1_T8	KRX63318.1_T9	KRY20556.1_T12	TP05934_T4	KRZ77276.1_T10	KRZ09922.1_T11
3090	EFV54264_T1	KRZ58105.1_T2	KRY49143.1_T3	KRX41069.1_T5	KRX73726.1_T6	KRX20641.1_T7	KRZ86447.1_T8	KRX63306.1_T9	KRY20491.1_T12	TP05936_T4	KRZ77220.1_T10	KRZ09915.1_T11
3091	EFV54265_T1	KRZ58082.1_T2	KRY49145.1_T3	KRX41060.1_T5	KRX73718.1_T6	KRX20638.1_T7	KRZ86409.1_T8	KRX63351.1_T9	KRY20565.1_T12	TP05938_T4	KRZ77188.1_T10	KRZ09896.1_T11
3092	EFV54270_T1	KRZ58101.1_T2	KRY49131.1_T3	KRX41053.1_T5	KRX73730.1_T6	KRX20541.1_T7	KRZ86418.1_T8	KRX63346.1_T9	KRY20539.1_T12	TP05947_T4	KRZ77251.1_T10	KRZ09914.1_T11
3093	EFV54278_T1	KRZ58072.1_T2	KRY49135.1_T3	KRX41048.1_T5	KRX73712.1_T6	KRX13050.1_T7	KRZ86424.1_T8	KRX63332.1_T9	KRY20557.1_T12	TP05945_T4	KRZ77237.1_T10	KRZ09920.1_T11
3094	EFV54287_T1	KRZ58078.1_T2	KRY49208.1_T3	KRX35904.1_T5	KRX71759.1_T6	KRX14809.1_T7	KRZ86429.1_T8	KRX54601.1_T9	KRY09322.1_T12	TP05958_T4	KRZ67266.1_T10	KRZ13605.1_T11
3095	EFV54288_T1	KRZ58075.1_T2	KRY49203.1_T3	KRX35897.1_T5	KRX71778.1_T6	KRX14842.1_T7	KRZ86413.1_T8	KRX54594.1_T9	KRY09325.1_T12	TP05957_T4	KRZ67270.1_T10	KRZ13622.1_T11
3096	EFV54289_T1	KRZ58085.1_T2	KRY49190.1_T3	KRX35451.1_T5	KRX71766.1_T6	KRX14817.1_T7	KRZ86440.1_T8	KRX54597.1_T9	KRY09328.1_T12	TP05956_T4	KRZ67263.1_T10	KRZ13607.1_T11
3097	EFV54295_T1	KRZ58118.1_T2	KRY49187.1_T3	KRX35358.1_T5	KRX71762.1_T6	KRX14843.1_T7	KRZ83841.1_T8	KRX52041.1_T9	KRY08187.1_T12	TP05976_T4	KRZ67262.1_T10	KRZ13556.1_T11
3098	EFV54297_T1	KRZ58098.1_T2	KRY49183.1_T3	KRX35368.1_T5	KRX71777.1_T6	KRX14823.1_T7	KRZ83829.1_T8	KRX52045.1_T9	KRY08191.1_T12	TP05973_T4	KRZ67259.1_T10	KRZ13602.1_T11
3099	EFV54302_T1	KRZ58097.1_T2	KRY46008.1_T3	KRX43534.1_T5	KRX69968.1_T6	KRX14833.1_T7	KRZ83825.1_T8	KRX54596.1_T9	KRY08915.1_T12	TP05967_T4	KRZ66299.1_T10	KRZ13610.1_T11
3100	EFV54303_T1	KRZ58130.1_T2	KRY46009.1_T3	KRX43520.1_T5	KRX69954.1_T6	KRX14826.1_T7	KRZ83833.1_T8	KRX54603.1_T9	KRY08914.1_T12	TP05964_T4	KRZ66302.1_T10	KRZ13620.1_T11
3101	EFV54309_T1	KRZ62102.1_T2	KRY50433.1_T3	KRX47565.1_T5	KRX74606.1_T6	KRX24227.1_T7	KRZ90074.1_T8	KRX57875.1_T9	KRY10672.1_T12	TP05902_T4	KRZ69186.1_T10	KRZ05697.1_T11
3102	EFV54310_T1	KRZ62029.1_T2	KRY50443.1_T3	KRX47526.1_T5	KRX74604.1_T6	KRX24185.1_T7	KRZ90032.1_T8	KRX57838.1_T9	KRY10668.1_T12	TP05903_T4	KRZ69211.1_T10	KRZ05691.1_T11
3103	EFV54316_T1	KRZ62008.1_T2	KRY50409.1_T3	KRX47589.1_T5	KRX74623.1_T6	KRX24206.1_T7	KRZ90002.1_T8	KRX54324.1_T9	KRY10700.1_T12	TP05908_T4	KRZ69193.1_T10	KRZ05696.1_T11
3104	EFV54317_T1	KRZ62006.1_T2	KRY50436.1_T3	KRX47545.1_T5	KRX74598.1_T6	KRX24169.1_T7	KRZ90052.1_T8	KRX54323.1_T9	KRY10689.1_T12	TP05909_T4	KRZ69181.1_T10	KRZ05713.1_T11
3105	EFV54318_T1	KRZ62049.1_T2	KRY50447.1_T3	KRX47560.1_T5	KRX74619.1_T6	KRX24152.1_T7	KRZ90048.1_T8	KRX54312.1_T9	KRY10717.1_T12	TP05910_T4	KRZ69213.1_T10	KRZ05715.1_T11
3106	EFV54319_T1	KRZ62072.1_T2	KRY50423.1_T3	KRX47590.1_T5	KRX74591.1_T6	KRX24121.1_T7	KRZ89999.1_T8	KRX54310.1_T9	KRY10714.1_T12	TP05911_T4	KRZ69194.1_T10	KRZ05712.1_T11
3107	EFV54322_T1	KRZ62068.1_T2	KRY50416.1_T3	KRX47535.1_T5	KRX74601.1_T6	KRX24176.1_T7	KRZ90014.1_T8	KRX54315.1_T9	KRY10707.1_T12	TP05915_T4	KRZ69200.1_T10	KRZ05718.1_T11
3108	EFV54324_T1	KRZ62103.1_T2	KRY50425.1_T3	KRX47580.1_T5	KRX74625.1_T6	KRX24211.1_T7	KRZ90049.1_T8	KRX54333.1_T9	KRY10697.1_T12	TP05917_T4	KRZ69183.1_T10	KRZ05699.1_T11
3110	EFV54326_T1	KRZ62045.1_T2	KRY50427.1_T3	KRX47540.1_T5	KRX74621.1_T6	KRX24236.1_T7	KRZ90000.1_T8	KRX54329.1_T9	KRY10696.1_T12	TP05920_T4	KRZ69206.1_T10	KRZ05710.1_T11
3111	EFV54328_T1	KRZ62019.1_T2	KRY50442.1_T3	KRX47533.1_T5	KRX74627.1_T6	KRX24272.1_T7	KRZ90017.1_T8	KRX54306.1_T9	KRY10693.1_T12	TP05922_T4	KRZ69184.1_T10	KRZ05707.1_T11
3112	EFV54330_T1	KRZ62084.1_T2	KRY50435.1_T3	KRX47567.1_T5	KRX74612.1_T6	KRX24189.1_T7	KRZ90045.1_T8	KRX54297.1_T9	KRY10695.1_T12	TP05924_T4	KRZ69205.1_T10	KRZ05690.1_T11
3113	EFV54344_T1	KRZ62083.1_T2	KRY58175.1_T3	KRX42476.1_T5	KRX70785.1_T6	KRX24134.1_T7	KRZ90009.1_T8	KRX57848.1_T9	KRY13044.1_T12	TP06802_T4	KRZ68776.1_T10	KRZ05393.1_T11
3114	EFV54347_T1	KRZ62074.1_T2	KRY58239.1_T3	KRX42479.1_T5	KRX70778.1_T6	KRX24247.1_T7	KRZ90026.1_T8	KRX57852.1_T9	KRY13008.1_T12	TP06806_T4	KRZ68795.1_T10	KRZ05410.1_T11
3115	EFV54348_T1	KRZ62070.1_T2	KRY58203.1_T3	KRX42477.1_T5	KRX70779.1_T6	KRX24124.1_T7	KRZ90058.1_T8	KRX57877.1_T9	KRY13024.1_T12	TP06807_T4	KRZ68774.1_T10	KRZ05411.1_T11
3116	EFV54349_T1	KRZ62052.1_T2	KRY58215.1_T3	KRX42507.1_T5	KRX70789.1_T6	KRX24168.1_T7	KRZ90077.1_T8	KRX57884.1_T9	KRY13021.1_T12	TP06808_T4	KRZ68793.1_T10	KRZ05421.1_T11
3117	EFV54350_T1	KRZ62088.1_T2	KRY58236.1_T3	KRX42481.1_T5	KRX70777.1_T6	KRX24191.1_T7	KRZ90083.1_T8	KRX57872.1_T9	KRY13040.1_T12	TP06810_T4	KRZ68777.1_T10	KRZ05404.1_T11
3118	EFV54351_T1	KRZ62039.1_T2	KRY58177.1_T3	KRX42495.1_T5	KRX73633.1_T6	KRX24255.1_T7	KRZ90054.1_T8	KRX57835.1_T9	KRY13015.1_T12	TP06785_T4	KRZ68772.1_T10	KRZ05387.1_T11
3119	EFV54352_T1	KRZ62126.1_T2	KRY58167.1_T3	KRX42503.1_T5	KRX73624.1_T6	KRX24173.1_T7	KRZ90030.1_T8	KRX57856.1_T9	KRY13032.1_T12	TP06788_T4	KRZ68787.1_T10	KRZ05413.1_T11
3120	EFV54353_T1	KRZ62058.1_T2	KRY58155.1_T3	KRX42486.1_T5	KRX73607.1_T6	KRX24141.1_T7	KRZ90057.1_T8	KRX57881.1_T9	KRY13022.1_T12	TP06789_T4	KRZ68802.1_T10	KRZ05401.1_T11
3121	EFV54354_T1	KRZ62011.1_T2	KRY58214.1_T3	KRX42491.1_T5	KRX73617.1_T6	KRX24125.1_T7	KRZ90008.1_T8	KRX57870.1_T9	KRY13019.1_T12	TP06790_T4	KRZ68801.1_T10	KRZ05384.1_T11
3122	EFV54355_T1	KRZ62014.1_T2	KRY58256.1_T3	KRX42492.1_T5	KRX73614.1_T6	KRX24171.1_T7	KRZ90022.1_T8	KRX57846.1_T9	KRY13037.1_T12	TP06793_T4	KRZ68782.1_T10	KRZ05418.1_T11
3123	EFV54356_T1	KRZ62099.1_T2	KRY58173.1_T3	KRX42504.1_T5	KRX73618.1_T6	KRX24192.1_T7	KRZ90050.1_T8	KRX57836.1_T9	KRY13017.1_T12	TP06794_T4	KRZ68798.1_T10	KRZ05408.1_T11
3124	EFV54357_T1	KRZ62116.1_T2	KRY58225.1_T3	KRX42494.1_T5	KRX73621.1_T6	KRX24139.1_T7	KRZ90020.1_T8	KRX57861.1_T9	KRY13045.1_T12	TP06795_T4	KRZ68771.1_T10	KRZ05386.1_T11
3125	EFV54361_T1	KRZ48803.1_T2	KRY48473.1_T3	KRX35548.1_T5	KRX69698.1_T6	KRX16060.1_T7	KRZ82653.1_T8	KRX52200.1_T9	KRY14638.1_T12	TP06780_T4	KRZ80470.1_T10	KRZ01745.1_T11
3126	EFV54371_T1	KRZ57638.1_T2	KRY57507.1_T3	KRX43423.1_T5	KRX81886.1_T6	KRX17867.1_T7	KRZ91288.1_T8	KRX61623.1_T9	KRY22759.1_T12	TP00848_T4	KRZ72806.1_T10	KRZ12663.1_T11
3127	EFV54372_T1	KRZ57667.1_T2	KRY57532.1_T3	KRX43407.1_T5	KRX81916.1_T6	KRX17826.1_T7	KRZ91297.1_T8	KRX61578.1_T9	KRY22792.1_T12	TP00845_T4	KRZ72785.1_T10	KRZ12685.1_T11
3128	EFV54375_T1	KRZ57666.1_T2	KRY57562.1_T3	KRX43410.1_T5	KRX81884.1_T6	KRX17827.1_T7	KRZ91276.1_T8	KRX61629.1_T9	KRY22772.1_T12	TP00843_T4	KRZ72783.1_T10	KRZ12667.1_T11
3129	EFV54377_T1	KRZ57631.1_T2	KRY57545.1_T3	KRX43399.1_T5	KRX81937.1_T6	KRX17860.1_T7	KRZ91237.1_T8	KRX61580.1_T9	KRY22799.1_T12	TP00839_T4	KRZ72763.1_T10	KRZ12646.1_T11
3130	EFV54380_T1	KRZ57639.1_T2	KRY57518.1_T3	KRX43416.1_T5	KRX81889.1_T6	KRX17837.1_T7	KRZ91262.1_T8	KRX61627.1_T9	KRY22732.1_T12	TP00834_T4	KRZ72793.1_T10	KRZ12673.1_T11
3131	EFV54382_T1	KRZ57662.1_T2	KRY57553.1_T3	KRX43417.1_T5	KRX81931.1_T6	KRX17843.1_T7	KRZ91249.1_T8	KRX61616.1_T9	KRY22733.1_T12	TP00832_T4	KRZ72756.1_T10	KRZ12701.1_T11
3132	EFV54383_T1	KRZ57626.1_T2	KRY57542.1_T3	KRX43388.1_T5	KRX81913.1_T6	KRX17839.1_T7	KRZ91228.1_T8	KRX61594.1_T9	KRY22829.1_T12	TP00830_T4	KRZ72770.1_T10	KRZ12666.1_T11
3133	EFV54384_T1	KRZ57655.1_T2	KRY57551.1_T3	KRX43415.1_T5	KRX81875.1_T6	KRX17874.1_T7	KRZ91291.1_T8	KRX61553.1_T9	KRY22814.1_T12	TP00828_T4	KRZ72791.1_T10	KRZ12650.1_T11
3135	EFV54388_T1	KRZ57636.1_T2	KRY57540.1_T3	KRX43402.1_T5	KRX81906.1_T6	KRX17868.1_T7	KRZ91306.1_T8	KRX61626.1_T9	KRY22753.1_T12	TP00826_T4	KRZ72800.1_T10	KRZ12661.1_T11
3136	EFV54389_T1	KRZ57641.1_T2	KRY57548.1_T3	KRX43393.1_T5	KRX81885.1_T6	KRX17875.1_T7	KRZ91260.1_T8	KRX61566.1_T9	KRY22825.1_T12	TP00824_T4	KRZ72773.1_T10	KRZ12722.1_T11
3137	EFV54390_T1	KRZ57650.1_T2	KRY57503.1_T3	KRX43413.1_T5	KRX81891.1_T6	KRX17835.1_T7	KRZ91304.1_T8	KRX61596.1_T9	KRY22744.1_T12	TP00823_T4	KRZ72804.1_T10	KRZ12694.1_T11
3138	EFV54394_T1	KRZ57658.1_T2	KRY57512.1_T3	KRX43389.1_T5	KRX81945.1_T6	KRX17862.1_T7	KRZ91240.1_T8	KRX61598.1_T9	KRY22754.1_T12	TP00820_T4	KRZ72771.1_T10	KRZ12691.1_T11
3139	EFV54411_T1	KRZ48529.1_T2	KRY56642.1_T3	KRX35108.1_T5	KRX76503.1_T6	KRX18912.1_T7	KRZ91371.1_T8	KRX66223.1_T9	KRY11886.1_T12	TP06847_T4	KRZ74804.1_T10	KRZ09091.1_T11
3140	EFV54413_T1	KRZ48526.1_T2	KRY56628.1_T3	KRX35105.1_T5	KRX76513.1_T6	KRX18902.1_T7	KRZ91397.1_T8	KRX66146.1_T9	KRY11888.1_T12	TP06848_T4	KRZ74835.1_T10	KRZ09099.1_T11
3141	EFV54415_T1	KRZ57732.1_T2	KRY56630.1_T3	KRX50950.1_T5	KRX76500.1_T6	KRX18914.1_T7	KRZ91324.1_T8	KRX66173.1_T9	KRY11881.1_T12	TP06849_T4	KRZ74793.1_T10	KRZ11879.1_T11
3142	EFV54416_T1	KRZ57687.1_T2	KRY56602.1_T3	KRX50904.1_T5	KRX76532.1_T6	KRX18911.1_T7	KRZ91382.1_T8	KRX66149.1_T9	KRY11894.1_T12	TP06850_T4	KRZ74849.1_T10	KRZ11956.1_T11
3143	EFV54417_T1	KRZ57696.1_T2	KRY56600.1_T3	KRX51022.1_T5	KRX76498.1_T6	KRX18930.1_T7	KRZ91361.1_T8	KRX66170.1_T9	KRY11897.1_T12	TP06852_T4	KRZ74792.1_T10	KRZ11931.1_T11
3144	EFV54419_T1	KRZ57691.1_T2	KRY56612.1_T3	KRX51016.1_T5	KRX76501.1_T6	KRX18934.1_T7	KRZ91352.1_T8	KRX66224.1_T9	KRY11871.1_T12	TP06854_T4	KRZ74857.1_T10	KRZ11954.1_T11
3145	EFV54420_T1	KRZ57718.1_T2	KRY56601.1_T3	KRX50992.1_T5	KRX76490.1_T6	KRX18941.1_T7	KRZ91374.1_T8	KRX66195.1_T9	KRY11873.1_T12	TP06855_T4	KRZ74784.1_T10	KRZ11944.1_T11
3146	EFV54421_T1	KRZ57689.1_T2	KRY56615.1_T3	KRX50934.1_T5	KRX76491.1_T6	KRX18938.1_T7	KRZ91380.1_T8	KRX66207.1_T9	KRY11885.1_T12	TP06856_T4	KRZ74851.1_T10	KRZ11923.1_T11
3147	EFV54423_T1	KRZ57701.1_T2	KRY56588.1_T3	KRX51026.1_T5	KRX76516.1_T6	KRX18946.1_T7	KRZ91314.1_T8	KRX66197.1_T9	KRY11874.1_T12	TP06857_T4	KRZ74809.1_T10	KRZ11911.1_T11
3148	EFV54424_T1	KRZ57706.1_T2	KRY56614.1_T3	KRX50997.1_T5	KRX76511.1_T6	KRX18910.1_T7	KRZ91325.1_T8	KRX66240.1_T9	KRY11877.1_T12	TP06858_T4	KRZ74828.1_T10	KRZ11874.1_T11
3149	EFV54426_T1	KRZ57720.1_T2	KRY56598.1_T3	KRX50967.1_T5	KRX76497.1_T6	KRX18909.1_T7	KRZ91334.1_T8	KRX66162.1_T9	KRY11892.1_T12	TP06861_T4	KRZ74855.1_T10	KRZ11925.1_T11
3150	EFV54427_T1	KRZ57731.1_T2	KRY56623.1_T3	KRX51007.1_T5	KRX76523.1_T6	KRX18900.1_T7	KRZ91311.1_T8	KRX66241.1_T9	KRY11901.1_T12	TP06862_T4	KRZ74856.1_T10	KRZ11915.1_T11
3152	EFV54432_T1	KRZ57722.1_T2	KRY49653.1_T3	KRX41478.1_T5	KRX72163.1_T6	KRX18919.1_T7	KRZ92324.1_T8	KRX66222.1_T9	KRY19177.1_T12	TP00911_T4	KRZ68569.1_T10	KRZ11881.1_T11
3153	EFV54433_T1	KRZ57717.1_T2	KRY49676.1_T3	KRX41468.1_T5	KRX72153.1_T6	KRX18947.1_T7	KRZ92332.1_T8	KRX66264.1_T9	KRY19241.1_T12	TP00912_T4	KRZ68577.1_T10	KRZ11940.1_T11
3154	EFV54434_T1	KRZ57697.1_T2	KRY49682.1_T3	KRX41464.1_T5	KRX72158.1_T6	KRX18918.1_T7	KRZ92307.1_T8	KRX66161.1_T9	KRY19215.1_T12	TP00913_T4	KRZ68575.1_T10	KRZ11922.1_T11
3155	EFV54435_T1	KRZ57698.1_T2	KRY49667.1_T3	KRX41470.1_T5	KRX72164.1_T6	KRX18932.1_T7	KRZ92364.1_T8	KRX66234.1_T9	KRY19159.1_T12	TP00914_T4	KRZ68579.1_T10	KRZ11882.1_T11
3156	EFV54442_T1	KRZ57729.1_T2	KRY49668.1_T3	KRX41477.1_T5	KRX75217.1_T6	KRX18936.1_T7	KRZ92316.1_T8	KRX66178.1_T9	KRY19186.1_T12	TP00923_T4	KRZ68567.1_T10	KRZ11913.1_T11
3157	EFV54445_T1	KRZ57686.1_T2	KRY49679.1_T3	KRX41463.1_T5	KRX75219.1_T6	KRX18898.1_T7	KRZ92322.1_T8	KRX66198.1_T9	KRY19180.1_T12	TP00926_T4	KRZ68582.1_T10	KRZ11932.1_T11
3158	EFV54447_T1	KRZ54111.1_T2	KRY45890.1_T3	KRX35923.1_T5	KRX72154.1_T6	KRX18907.1_T7	KRZ85802.1_T8	KRX52662.1_T9	KRY13949.1_T12	TP03651_T4	KRZ69594.1_T10	KRZ02107.1_T11
3159	EFV54448_T1	KRZ54099.1_T2	KRY45896.1_T3	KRX35931.1_T5	KRX72169.1_T6	KRX18886.1_T7	KRZ85779.1_T8	KRX52669.1_T9	KRY13970.1_T12	TP03650_T4	KRZ69587.1_T10	KRZ02115.1_T11
3160	EFV54449_T1	KRZ54079.1_T2	KRY45891.1_T3	KRX35925.1_T5	KRX72162.1_T6	KRX18929.1_T7	KRZ85778.1_T8	KRX52665.1_T9	KRY13953.1_T12	TP03649_T4	KRZ69569.1_T10	KRZ02111.1_T11
3161	EFV54450_T1	KRZ54076.1_T2	KRY45894.1_T3	KRX35930.1_T5	KRX72168.1_T6	KRX18923.1_T7	KRZ85785.1_T8	KRX52661.1_T9	KRY13946.1_T12	TP03648_T4	KRZ69584.1_T10	KRZ02113.1_T11
3162	EFV54453_T1	KRZ52887.1_T2	KRY57519.1_T3	KRX42746.1_T5	KRX81863.1_T6	KRX24268.1_T7	KRZ91267.1_T8	KRX54625.1_T9	KRY12911.1_T12	TP00879_T4	KRZ68247.1_T10	KRZ11935.1_T11
3163	EFV54455_T1	KRZ52883.1_T2	KRY57504.1_T3	KRX42745.1_T5	KRX81941.1_T6	KRX24240.1_T7	KRZ91229.1_T8	KRX54630.1_T9	KRY12894.1_T12	TP00878_T4	KRZ68238.1_T10	KRZ11950.1_T11
3164	EFV54458_T1	KRZ52869.1_T2	KRY57547.1_T3	KRX42727.1_T5	KRX81911.1_T6	KRX24230.1_T7	KRZ91234.1_T8	KRX54642.1_T9	KRY12908.1_T12	TP00876_T4	KRZ68260.1_T10	KRZ11947.1_T11
3165	EFV54459_T1	KRZ52880.1_T2	KRY57495.1_T3	KRX42743.1_T5	KRX81895.1_T6	KRX24159.1_T7	KRZ91266.1_T8	KRX54627.1_T9	KRY12892.1_T12	TP00875_T4	KRZ68248.1_T10	KRZ11877.1_T11
3166	EFV54460_T1	KRZ52892.1_T2	KRY57494.1_T3	KRX42736.1_T5	KRX81872.1_T6	KRX24181.1_T7	KRZ91294.1_T8	KRX54639.1_T9	KRY12901.1_T12	TP00874_T4	KRZ68258.1_T10	KRZ11872.1_T11
3167	EFV54461_T1	KRZ52879.1_T2	KRY57514.1_T3	KRX42731.1_T5	KRX81870.1_T6	KRX24243.1_T7	KRZ91277.1_T8	KRX54636.1_T9	KRY12899.1_T12	TP00873_T4	KRZ68236.1_T10	KRZ11942.1_T11
3168	EFV54465_T1	KRZ52890.1_T2	KRY57535.1_T3	KRX42739.1_T5	KRX81899.1_T6	KRX24196.1_T7	KRZ91286.1_T8	KRX54635.1_T9	KRY12904.1_T12	TP00871_T4	KRZ68262.1_T10	KRZ11891.1_T11
3169	EFV54468_T1	KRZ52882.1_T2	KRY57530.1_T3	KRX42741.1_T5	KRX81901.1_T6	KRX24228.1_T7	KRZ91233.1_T8	KRX54634.1_T9	KRY12909.1_T12	TP00870_T4	KRZ68263.1_T10	KRZ11875.1_T11
3170	EFV54469_T1	KRZ52876.1_T2	KRY57509.1_T3	KRX42729.1_T5	KRX81920.1_T6	KRX24209.1_T7	KRZ91257.1_T8	KRX54631.1_T9	KRY12895.1_T12	TP00869_T4	KRZ68250.1_T10	KRZ11883.1_T11
3171	EFV54472_T1	KRZ54088.1_T2	KRY48568.1_T3	KRX40506.1_T5	KRX73209.1_T6	KRX26539.1_T7	KRZ85791.1_T8	KRX56300.1_T9	KRY13950.1_T12	TP00885_T4	KRZ69580.1_T10	KRZ04022.1_T11
3172	EFV54479_T1	KRZ54110.1_T2	KRY48566.1_T3	KRX40511.1_T5	KRX73185.1_T6	KRX26457.1_T7	KRZ85772.1_T8	KRX56297.1_T9	KRY13954.1_T12	TP00890_T4	KRZ69574.1_T10	KRZ04007.1_T11
3173	EFV54482_T1	KRZ54097.1_T2	KRY48567.1_T3	KRX40499.1_T5	KRX73178.1_T6	KRX26488.1_T7	KRZ85792.1_T8	KRX56301.1_T9	KRY13972.1_T12	TP00894_T4	KRZ69577.1_T10	KRZ04027.1_T11
3174	EFV54483_T1	KRZ54106.1_T2	KRY48561.1_T3	KRX40490.1_T5	KRX73180.1_T6	KRX26578.1_T7	KRZ85770.1_T8	KRX56279.1_T9	KRY13948.1_T12	TP00895_T4	KRZ69589.1_T10	KRZ04014.1_T11
3175	EFV54486_T1	KRZ54081.1_T2	KRY48575.1_T3	KRX40514.1_T5	KRX73184.1_T6	KRX26521.1_T7	KRZ85793.1_T8	KRX56290.1_T9	KRY13978.1_T12	TP00897_T4	KRZ69597.1_T10	KRZ04023.1_T11
3176	EFV54487_T1	KRZ54090.1_T2	KRY48547.1_T3	KRX40508.1_T5	KRX73196.1_T6	KRX26375.1_T7	KRZ85776.1_T8	KRX56308.1_T9	KRY13960.1_T12	TP00898_T4	KRZ69567.1_T10	KRZ04024.1_T11
3177	EFV54490_T1	KRZ54107.1_T2	KRY48562.1_T3	KRX40510.1_T5	KRX73193.1_T6	KRX26419.1_T7	KRZ85797.1_T8	KRX56283.1_T9	KRY13943.1_T12	TP00902_T4	KRZ69572.1_T10	KRZ04006.1_T11
3178	EFV54492_T1	KRZ54089.1_T2	KRY48543.1_T3	KRX40502.1_T5	KRX73208.1_T6	KRX26376.1_T7	KRZ85788.1_T8	KRX56281.1_T9	KRY13968.1_T12	TP00903_T4	KRZ69570.1_T10	KRZ04008.1_T11
3179	EFV54493_T1	KRZ54101.1_T2	KRY48571.1_T3	KRX40503.1_T5	KRX73202.1_T6	KRX26531.1_T7	KRZ85781.1_T8	KRX56284.1_T9	KRY13961.1_T12	TP00904_T4	KRZ69563.1_T10	KRZ04010.1_T11
3180	EFV54496_T1	KRZ52030.1_T2	KRY55376.1_T3	KRX36046.1_T5	KRX73280.1_T6	KRX24130.1_T7	KRZ82758.1_T8	KRX61582.1_T9	KRY14634.1_T12	TP07309_T4	KRZ78949.1_T10	KRZ06343.1_T11
3181	EFV54505_T1	KRZ52016.1_T2	KRY55371.1_T3	KRX37180.1_T5	KRX73266.1_T6	KRX24123.1_T7	KRZ91872.1_T8	KRX53032.1_T9	KRY14614.1_T12	TP00858_T4	KRZ78894.1_T10	KRZ06354.1_T11
3182	EFV54508_T1	KRZ52014.1_T2	KRY55372.1_T3	KRX37186.1_T5	KRX73271.1_T6	KRX24188.1_T7	KRZ91813.1_T8	KRX53037.1_T9	KRY14613.1_T12	TP00860_T4	KRZ78967.1_T10	KRZ06353.1_T11
3183	EFV54509_T1	KRZ52011.1_T2	KRY55396.1_T3	KRX37176.1_T5	KRX73285.1_T6	KRX24117.1_T7	KRZ91825.1_T8	KRX53031.1_T9	KRY14640.1_T12	TP00861_T4	KRZ78883.1_T10	KRZ06355.1_T11
3184	EFV54511_T1	KRZ52022.1_T2	KRY55367.1_T3	KRX37179.1_T5	KRX73268.1_T6	KRX24138.1_T7	KRZ91780.1_T8	KRX53028.1_T9	KRY14610.1_T12	TP00863_T4	KRZ78946.1_T10	KRZ06364.1_T11
3185	EFV54513_T1	KRZ52031.1_T2	KRY55360.1_T3	KRX37183.1_T5	KRX73288.1_T6	KRX24266.1_T7	KRZ91800.1_T8	KRX53033.1_T9	KRY14609.1_T12	TP00866_T4	KRZ78854.1_T10	KRZ06365.1_T11
3186	EFV54517_T1	KRZ56214.1_T2	KRY56593.1_T3	KRX41243.1_T5	KRX76609.1_T6	KRX20814.1_T7	KRZ92305.1_T8	KRX63700.1_T9	KRY18051.1_T12	TP06841_T4	KRZ74825.1_T10	KRZ07429.1_T11
3187	EFV54519_T1	KRZ56222.1_T2	KRY56585.1_T3	KRX41261.1_T5	KRX76619.1_T6	KRX20780.1_T7	KRZ92340.1_T8	KRX63634.1_T9	KRY18016.1_T12	TP06832_T4	KRZ74833.1_T10	KRZ07443.1_T11
3188	EFV54520_T1	KRZ56246.1_T2	KRY56617.1_T3	KRX41258.1_T5	KRX76624.1_T6	KRX20817.1_T7	KRZ92331.1_T8	KRX63705.1_T9	KRY18057.1_T12	TP06834_T4	KRZ74859.1_T10	KRZ07413.1_T11
3189	EFV54527_T1	KRZ56227.1_T2	KRY56610.1_T3	KRX41254.1_T5	KRX76601.1_T6	KRX20757.1_T7	KRZ92320.1_T8	KRX63630.1_T9	KRY18030.1_T12	TP06838_T4	KRZ74838.1_T10	KRZ07420.1_T11
3190	EFV54531_T1	KRZ56225.1_T2	KRY56587.1_T3	KRX50999.1_T5	KRX76599.1_T6	KRX20783.1_T7	KRZ92352.1_T8	KRX63727.1_T9	KRY18035.1_T12	TP06831_T4	KRZ74790.1_T10	KRZ07410.1_T11
3191	EFV54533_T1	KRZ56244.1_T2	KRY56573.1_T3	KRX50948.1_T5	KRX76598.1_T6	KRX20752.1_T7	KRZ92338.1_T8	KRX63686.1_T9	KRY18014.1_T12	TP06824_T4	KRZ74850.1_T10	KRZ07408.1_T11
3192	EFV54534_T1	KRZ56242.1_T2	KRY56637.1_T3	KRX50969.1_T5	KRX76625.1_T6	KRX20746.1_T7	KRZ92313.1_T8	KRX63655.1_T9	KRY18028.1_T12	TP06825_T4	KRZ74829.1_T10	KRZ07406.1_T11
3193	EFV54538_T1	KRZ56221.1_T2	KRY56618.1_T3	KRX50905.1_T5	KRX76612.1_T6	KRX20747.1_T7	KRZ92279.1_T8	KRX63617.1_T9	KRY18021.1_T12	TP06829_T4	KRZ74820.1_T10	KRZ07400.1_T11
3194	EFV54546_T1	KRZ50653.1_T2	KRY47902.1_T3	KRX38753.1_T5	KRX80160.1_T6	KRX26368.1_T7	KRZ91345.1_T8	KRX63654.1_T9	KRY18063.1_T12	TP06812_T4	KRZ67092.1_T10	KRZ03215.1_T11
3195	EFV54547_T1	KRZ50632.1_T2	KRY47907.1_T3	KRX38742.1_T5	KRX80194.1_T6	KRX26425.1_T7	KRZ91351.1_T8	KRX63656.1_T9	KRY18025.1_T12	TP06813_T4	KRZ67083.1_T10	KRZ03213.1_T11
3196	EFV54548_T1	KRZ50631.1_T2	KRY47898.1_T3	KRX38737.1_T5	KRX80164.1_T6	KRX26383.1_T7	KRZ91375.1_T8	KRX63704.1_T9	KRY18064.1_T12	TP06814_T4	KRZ67102.1_T10	KRZ03210.1_T11
3197	EFV54551_T1	KRZ50647.1_T2	KRY47921.1_T3	KRX38746.1_T5	KRX80232.1_T6	KRX26504.1_T7	KRZ91323.1_T8	KRX63625.1_T9	KRY18005.1_T12	TP06815_T4	KRZ67103.1_T10	KRZ03222.1_T11
3198	EFV54555_T1	KRZ50642.1_T2	KRY47911.1_T3	KRX38754.1_T5	KRX80161.1_T6	KRX26551.1_T7	KRZ91365.1_T8	KRX63683.1_T9	KRY18023.1_T12	TP06817_T4	KRZ67087.1_T10	KRZ03229.1_T11
3199	EFV54558_T1	KRZ50655.1_T2	KRY47918.1_T3	KRX38740.1_T5	KRX80200.1_T6	KRX26561.1_T7	KRZ91394.1_T8	KRX63661.1_T9	KRY18009.1_T12	TP06818_T4	KRZ67093.1_T10	KRZ03230.1_T11
3200	EFV54559_T1	KRZ50649.1_T2	KRY47903.1_T3	KRX38750.1_T5	KRX80179.1_T6	KRX26515.1_T7	KRZ91347.1_T8	KRX63708.1_T9	KRY18010.1_T12	TP06819_T4	KRZ67100.1_T10	KRZ03221.1_T11
3201	EFV54561_T1	KRZ50635.1_T2	KRY47900.1_T3	KRX38743.1_T5	KRX80236.1_T6	KRX26439.1_T7	KRZ91335.1_T8	KRX63715.1_T9	KRY18046.1_T12	TP06822_T4	KRZ67090.1_T10	KRZ03226.1_T11
3205	EFV54589_T1	KRZ59719.1_T2	KRY46293.1_T3	KRX36236.1_T5	KRX70084.1_T6	KRX16041.1_T7	KRZ89689.1_T8	KRX56280.1_T9	KRY09507.1_T12	TP04213_T4	KRZ66576.1_T10	KRZ06368.1_T11
3206	EFV54591_T1	KRZ59683.1_T2	KRY46292.1_T3	KRX36243.1_T5	KRX70082.1_T6	KRX16046.1_T7	KRZ89688.1_T8	KRX56304.1_T9	KRY09513.1_T12	TP04215_T4	KRZ66572.1_T10	KRZ06350.1_T11
3207	EFV54592_T1	KRZ59702.1_T2	KRY46305.1_T3	KRX36239.1_T5	KRX70076.1_T6	KRX16056.1_T7	KRZ89673.1_T8	KRX56273.1_T9	KRY09517.1_T12	TP04216_T4	KRZ66581.1_T10	KRZ06362.1_T11
3208	EFV54598_T1	KRZ59755.1_T2	KRY46298.1_T3	KRX36234.1_T5	KRX70074.1_T6	KRX16050.1_T7	KRZ89658.1_T8	KRX56286.1_T9	KRY09526.1_T12	TP04219_T4	KRZ66584.1_T10	KRZ06344.1_T11
3209	EFV54599_T1	KRZ59746.1_T2	KRY46295.1_T3	KRX36235.1_T5	KRX70078.1_T6	KRX16028.1_T7	KRZ89670.1_T8	KRX56277.1_T9	KRY09523.1_T12	TP04220_T4	KRZ66569.1_T10	KRZ06340.1_T11
3210	EFV54611_T1	KRZ60927.1_T2	KRY48475.1_T3	KRX47812.1_T5	KRX80167.1_T6	KRX16031.1_T7	KRZ83955.1_T8	KRX53233.1_T9	KRY12922.1_T12	TP04200_T4	KRZ73953.1_T10	KRZ12138.1_T11
3211	EFV54613_T1	KRZ60895.1_T2	KRY48482.1_T3	KRX47816.1_T5	KRX80158.1_T6	KRX16062.1_T7	KRZ83951.1_T8	KRX53219.1_T9	KRY12930.1_T12	TP04201_T4	KRZ74004.1_T10	KRZ12174.1_T11
3212	EFV54614_T1	KRZ60892.1_T2	KRY48460.1_T3	KRX47821.1_T5	KRX80168.1_T6	KRX16036.1_T7	KRZ83952.1_T8	KRX53220.1_T9	KRY12941.1_T12	TP04202_T4	KRZ73982.1_T10	KRZ12076.1_T11
3213	EFV54615_T1	KRZ60874.1_T2	KRY48487.1_T3	KRX47830.1_T5	KRX80231.1_T6	KRX16044.1_T7	KRZ83946.1_T8	KRX53214.1_T9	KRY12933.1_T12	TP04203_T4	KRZ73967.1_T10	KRZ12103.1_T11
3214	EFV54627_T1	KRZ57811.1_T2	KRY59465.1_T3	KRX46211.1_T5	KRX82602.1_T6	KRX20766.1_T7	KRZ97476.1_T8	KRX66468.1_T9	KRY20874.1_T12	TP04169_T4	KRZ73998.1_T10	KRZ12146.1_T11
3215	EFV54631_T1	KRZ57799.1_T2	KRY59501.1_T3	KRX46216.1_T5	KRX82553.1_T6	KRX20750.1_T7	KRZ97405.1_T8	KRX66399.1_T9	KRY20866.1_T12	TP04173_T4	KRZ73992.1_T10	KRZ12098.1_T11
3216	EFV54632_T1	KRZ57778.1_T2	KRY59432.1_T3	KRX46222.1_T5	KRX82529.1_T6	KRX20803.1_T7	KRZ97344.1_T8	KRX66478.1_T9	KRY20841.1_T12	TP04174_T4	KRZ73959.1_T10	KRZ12171.1_T11
3217	EFV54635_T1	KRZ57785.1_T2	KRY59448.1_T3	KRX46187.1_T5	KRX82580.1_T6	KRX20768.1_T7	KRZ97454.1_T8	KRX66408.1_T9	KRY20927.1_T12	TP04178_T4	KRZ74008.1_T10	KRZ12091.1_T11
3218	EFV54638_T1	KRZ57818.1_T2	KRY59460.1_T3	KRX46186.1_T5	KRX82519.1_T6	KRX20800.1_T7	KRZ97469.1_T8	KRX66351.1_T9	KRY20915.1_T12	TP04182_T4	KRZ73969.1_T10	KRZ12099.1_T11
3219	EFV54640_T1	KRZ57816.1_T2	KRY59482.1_T3	KRX46181.1_T5	KRX82584.1_T6	KRX20792.1_T7	KRZ97433.1_T8	KRX66499.1_T9	KRY20878.1_T12	TP04183_T4	KRZ73966.1_T10	KRZ12077.1_T11
3220	EFV54641_T1	KRZ57823.1_T2	KRY59516.1_T3	KRX46224.1_T5	KRX82595.1_T6	KRX20782.1_T7	KRZ97508.1_T8	KRX66480.1_T9	KRY20882.1_T12	TP04184_T4	KRZ73988.1_T10	KRZ12163.1_T11
3221	EFV54644_T1	KRZ57819.1_T2	KRY59456.1_T3	KRX46212.1_T5	KRX82524.1_T6	KRX20793.1_T7	KRZ97462.1_T8	KRX66378.1_T9	KRY20901.1_T12	TP04188_T4	KRZ74006.1_T10	KRZ12117.1_T11
3222	EFV54645_T1	KRZ57821.1_T2	KRY59522.1_T3	KRX46198.1_T5	KRX82615.1_T6	KRX20810.1_T7	KRZ97415.1_T8	KRX66417.1_T9	KRY20857.1_T12	TP04189_T4	KRZ73996.1_T10	KRZ12104.1_T11
3223	EFV54647_T1	KRZ57788.1_T2	KRY59458.1_T3	KRX46202.1_T5	KRX82546.1_T6	KRX20774.1_T7	KRZ97480.1_T8	KRX66325.1_T9	KRY20875.1_T12	TP04191_T4	KRZ74003.1_T10	KRZ12097.1_T11
3224	EFV54648_T1	KRZ57781.1_T2	KRY59468.1_T3	KRX46184.1_T5	KRX82559.1_T6	KRX20802.1_T7	KRZ97333.1_T8	KRX66345.1_T9	KRY20892.1_T12	TP04192_T4	KRZ73965.1_T10	KRZ12159.1_T11
3225	EFV54655_T1	KRZ57829.1_T2	KRY59427.1_T3	KRX46196.1_T5	KRX79374.1_T6	KRX20811.1_T7	KRZ97521.1_T8	KRX66424.1_T9	KRY20837.1_T12	TP04194_T4	KRZ73997.1_T10	KRZ12082.1_T11
3226	EFV54657_T1	KRZ57798.1_T2	KRY59491.1_T3	KRX46217.1_T5	KRX79328.1_T6	KRX20751.1_T7	KRZ97384.1_T8	KRX66400.1_T9	KRY20881.1_T12	TP04196_T4	KRZ73979.1_T10	KRZ12168.1_T11
3227	EFV54662_T1	KRZ52520.1_T2	KRY50690.1_T3	KRX44962.1_T5	KRX84106.1_T6	KRX16259.1_T7	KRZ89448.1_T8	KRX55337.1_T9	KRY13695.1_T12	TP09788_T4	KRZ73847.1_T10	KRZ12301.1_T11
3228	EFV54668_T1	KRZ52516.1_T2	KRY50687.1_T3	KRX44970.1_T5	KRX84181.1_T6	KRX13182.1_T7	KRZ89495.1_T8	KRX55335.1_T9	KRY13692.1_T12	TP09782_T4	KRZ73845.1_T10	KRZ12201.1_T11
3229	EFV54671_T1	KRZ49075.1_T2	KRY50707.1_T3	KRX44971.1_T5	KRX84183.1_T6	KRX13181.1_T7	KRZ89472.1_T8	KRX55315.1_T9	KRY13678.1_T12	TP09778_T4	KRZ73828.1_T10	KRZ12238.1_T11
3230	EFV54680_T1	KRZ52501.1_T2	KRY50699.1_T3	KRX44950.1_T5	KRX84178.1_T6	KRX16408.1_T7	KRZ89489.1_T8	KRX55314.1_T9	KRY13696.1_T12	TP09795_T4	KRZ73819.1_T10	KRZ12202.1_T11
3231	EFV54692_T1	KRZ52073.1_T2	KRY54453.1_T3	KRX47894.1_T5	KRX72816.1_T6	KRX16385.1_T7	KRZ93572.1_T8	KRX59875.1_T9	KRY17504.1_T12	TP09813_T4	KRZ73780.1_T10	KRZ12270.1_T11
3232	EFV54693_T1	KRZ52078.1_T2	KRY54398.1_T3	KRX47901.1_T5	KRX72819.1_T6	KRX16392.1_T7	KRZ93608.1_T8	KRX59816.1_T9	KRY17484.1_T12	TP09812_T4	KRZ73820.1_T10	KRZ12222.1_T11
3233	EFV54694_T1	KRZ52070.1_T2	KRY54406.1_T3	KRX47946.1_T5	KRX72801.1_T6	KRX16394.1_T7	KRZ93675.1_T8	KRX59817.1_T9	KRY17499.1_T12	TP09810_T4	KRZ73803.1_T10	KRZ12215.1_T11
3234	EFV54698_T1	KRZ52083.1_T2	KRY54393.1_T3	KRX47923.1_T5	KRX72817.1_T6	KRX16398.1_T7	KRZ93570.1_T8	KRX59881.1_T9	KRY17469.1_T12	TP09808_T4	KRZ73797.1_T10	KRZ12287.1_T11
3235	EFV54699_T1	KRZ52098.1_T2	KRY54418.1_T3	KRX47902.1_T5	KRX72794.1_T6	KRX16363.1_T7	KRZ93618.1_T8	KRX59849.1_T9	KRY17443.1_T12	TP09806_T4	KRZ73844.1_T10	KRZ12263.1_T11
3236	EFV54700_T1	KRZ52087.1_T2	KRY54423.1_T3	KRX47944.1_T5	KRX72802.1_T6	KRX16381.1_T7	KRZ93672.1_T8	KRX59858.1_T9	KRY17446.1_T12	TP09805_T4	KRZ73848.1_T10	KRZ12257.1_T11
3237	EFV54709_T1	KRZ52075.1_T2	KRY54442.1_T3	KRX47937.1_T5	KRX72807.1_T6	KRX16360.1_T7	KRZ93630.1_T8	KRX59871.1_T9	KRY17505.1_T12	TP09799_T4	KRZ73833.1_T10	KRZ12277.1_T11
3239	EFV54739_T1	KRZ61088.1_T2	KRY54430.1_T3	KRX47912.1_T5	KRX73822.1_T6	KRX20098.1_T7	KRZ89297.1_T8	KRX65366.1_T9	KRY17433.1_T12	TP07580_T4	KRZ78458.1_T10	KRZ05848.1_T11
3240	EFV54741_T1	KRZ61041.1_T2	KRY54417.1_T3	KRX47896.1_T5	KRX73845.1_T6	KRX20128.1_T7	KRZ89330.1_T8	KRX65449.1_T9	KRY17479.1_T12	TP07577_T4	KRZ78406.1_T10	KRZ05841.1_T11
3241	EFV54743_T1	KRZ61051.1_T2	KRY54409.1_T3	KRX47880.1_T5	KRX73842.1_T6	KRX20114.1_T7	KRZ89307.1_T8	KRX65370.1_T9	KRY17447.1_T12	TP07576_T4	KRZ78500.1_T10	KRZ05857.1_T11
3242	EFV54757_T1	KRZ61060.1_T2	KRY54444.1_T3	KRX47928.1_T5	KRX73814.1_T6	KRX20171.1_T7	KRZ89332.1_T8	KRX65444.1_T9	KRY17439.1_T12	TP07592_T4	KRZ78495.1_T10	KRZ05835.1_T11
3243	EFV54758_T1	KRZ61018.1_T2	KRY54446.1_T3	KRX47884.1_T5	KRX73837.1_T6	KRX20133.1_T7	KRZ89318.1_T8	KRX65316.1_T9	KRY17477.1_T12	TP07591_T4	KRZ78528.1_T10	KRZ05839.1_T11
3244	EFV54759_T1	KRZ61054.1_T2	KRY54413.1_T3	KRX47889.1_T5	KRX73841.1_T6	KRX20126.1_T7	KRZ89375.1_T8	KRX65419.1_T9	KRY17459.1_T12	TP07589_T4	KRZ78513.1_T10	KRZ05826.1_T11
3245	EFV54761_T1	KRZ61108.1_T2	KRY54427.1_T3	KRX47921.1_T5	KRX73832.1_T6	KRX20135.1_T7	KRZ89361.1_T8	KRX65471.1_T9	KRY17467.1_T12	TP07586_T4	KRZ78437.1_T10	KRZ05854.1_T11
3246	EFV54762_T1	KRZ61086.1_T2	KRY54456.1_T3	KRX47916.1_T5	KRX73828.1_T6	KRX20101.1_T7	KRZ89348.1_T8	KRX65464.1_T9	KRY17431.1_T12	TP07585_T4	KRZ78531.1_T10	KRZ05845.1_T11
3247	EFV54763_T1	KRZ61031.1_T2	KRY54437.1_T3	KRX47933.1_T5	KRX73826.1_T6	KRX20078.1_T7	KRZ89301.1_T8	KRX65343.1_T9	KRY17494.1_T12	TP07584_T4	KRZ78389.1_T10	KRZ05836.1_T11
3248	EFV54773_T1	KRZ51543.1_T2	KRY48667.1_T3	KRX41849.1_T5	KRX79758.1_T6	KRX13569.1_T7	KRZ89314.1_T8	KRX65338.1_T9	KRY11054.1_T12	TP07567_T4	KRZ76351.1_T10	KRZ12206.1_T11
3249	EFV54774_T1	KRZ61050.1_T2	KRY45676.1_T3	KRX41839.1_T5	KRX69542.1_T6	KRX13577.1_T7	KRZ82504.1_T8	KRX54474.1_T9	KRY07994.1_T12	TP07568_T4	KRZ76318.1_T10	KRZ12204.1_T11
3250	EFV54775_T1	KRZ61094.1_T2	KRY45670.1_T3	KRX41832.1_T5	KRX69543.1_T6	KRX13581.1_T7	KRZ82499.1_T8	KRX54483.1_T9	KRY07995.1_T12	TP07569_T4	KRZ76288.1_T10	KRZ12279.1_T11
3251	EFV54783_T1	KRZ51527.1_T2	KRY48641.1_T3	KRX41845.1_T5	KRX79748.1_T6	KRX20140.1_T7	KRZ89349.1_T8	KRX65356.1_T9	KRY11057.1_T12	TP07540_T4	KRZ79929.1_T10	KRZ15991.1_T11
3252	EFV54786_T1	KRZ51551.1_T2	KRY48654.1_T3	KRX41824.1_T5	KRX79707.1_T6	KRX20064.1_T7	KRZ89305.1_T8	KRX65429.1_T9	KRY11055.1_T12	TP07543_T4	KRZ79917.1_T10	KRZ16007.1_T11
3253	EFV54787_T1	KRZ51552.1_T2	KRY48663.1_T3	KRX41856.1_T5	KRX79749.1_T6	KRX20117.1_T7	KRZ89347.1_T8	KRX65458.1_T9	KRY11032.1_T12	TP07545_T4	KRZ80008.1_T10	KRZ16004.1_T11
3254	EFV54789_T1	KRZ51550.1_T2	KRY48656.1_T3	KRX41855.1_T5	KRX79747.1_T6	KRX20112.1_T7	KRZ89341.1_T8	KRX65361.1_T9	KRY11042.1_T12	TP07546_T4	KRZ79965.1_T10	KRZ16013.1_T11
3255	EFV54790_T1	KRZ51516.1_T2	KRY48673.1_T3	KRX41841.1_T5	KRX79773.1_T6	KRX20147.1_T7	KRZ89323.1_T8	KRX65452.1_T9	KRY11059.1_T12	TP07547_T4	KRZ80141.1_T10	KRZ15882.1_T11
3256	EFV54793_T1	KRZ51540.1_T2	KRY48666.1_T3	KRX41833.1_T5	KRX79721.1_T6	KRX20087.1_T7	KRZ89345.1_T8	KRX65447.1_T9	KRY11040.1_T12	TP07552_T4	KRZ79921.1_T10	KRZ16029.1_T11
3257	EFV54803_T1	KRZ56867.1_T2	KRY46915.1_T3	KRX43885.1_T5	KRX83787.1_T6	KRX22473.1_T7	KRZ91300.1_T8	KRX59890.1_T9	KRY13122.1_T12	TP03669_T4	KRZ78524.1_T10	KRZ15989.1_T11
3258	EFV54809_T1	KRZ56836.1_T2	KRY46911.1_T3	KRX43902.1_T5	KRX83858.1_T6	KRX22425.1_T7	KRZ91254.1_T8	KRX59821.1_T9	KRY13123.1_T12	TP03660_T4	KRZ78533.1_T10	KRZ15922.1_T11
3259	EFV54815_T1	KRZ56833.1_T2	KRY49282.1_T3	KRX43932.1_T5	KRX83886.1_T6	KRX22484.1_T7	KRZ90977.1_T8	KRX59895.1_T9	KRY13121.1_T12	TP07521_T4	KRZ78476.1_T10	KRZ16005.1_T11
3260	EFV54816_T1	KRZ56850.1_T2	KRY49264.1_T3	KRX43931.1_T5	KRX83882.1_T6	KRX22438.1_T7	KRZ90974.1_T8	KRX59830.1_T9	KRY13132.1_T12	TP07522_T4	KRZ78452.1_T10	KRZ15925.1_T11
3261	EFV54817_T1	KRZ56866.1_T2	KRY49260.1_T3	KRX43893.1_T5	KRX83904.1_T6	KRX22519.1_T7	KRZ91038.1_T8	KRX59891.1_T9	KRY13096.1_T12	TP07523_T4	KRZ78535.1_T10	KRZ15956.1_T11
3262	EFV54818_T1	KRZ56842.1_T2	KRY49275.1_T3	KRX43915.1_T5	KRX83825.1_T6	KRX22418.1_T7	KRZ90964.1_T8	KRX59872.1_T9	KRY13110.1_T12	TP07524_T4	KRZ78414.1_T10	KRZ15965.1_T11
3263	EFV54821_T1	KRZ56845.1_T2	KRY49280.1_T3	KRX43905.1_T5	KRX83891.1_T6	KRX22523.1_T7	KRZ91033.1_T8	KRX59839.1_T9	KRY13127.1_T12	TP07527_T4	KRZ78558.1_T10	KRZ15953.1_T11
3264	EFV54823_T1	KRZ56824.1_T2	KRY49251.1_T3	KRX43899.1_T5	KRX83885.1_T6	KRX22551.1_T7	KRZ90971.1_T8	KRX59835.1_T9	KRY13107.1_T12	TP07529_T4	KRZ78431.1_T10	KRZ16040.1_T11
3265	EFV54824_T1	KRZ56851.1_T2	KRY49283.1_T3	KRX43909.1_T5	KRX83855.1_T6	KRX22415.1_T7	KRZ90966.1_T8	KRX59826.1_T9	KRY13095.1_T12	TP07531_T4	KRZ78502.1_T10	KRZ15943.1_T11
3267	EFV54844_T1	KRZ57620.1_T2	KRY53627.1_T3	KRX50096.1_T5	KRX84119.1_T6	KRX14363.1_T7	KRZ95550.1_T8	KRX61792.1_T9	KRY16255.1_T12	TP10621_T4	KRZ71395.1_T10	KRZ07346.1_T11
3268	EFV54852_T1	KRZ57621.1_T2	KRY53645.1_T3	KRX50053.1_T5	KRX84115.1_T6	KRX16156.1_T7	KRZ95406.1_T8	KRX61811.1_T9	KRY16260.1_T12	TP10615_T4	KRZ71375.1_T10	KRZ07353.1_T11
3269	EFV54858_T1	KRZ57616.1_T2	KRY53649.1_T3	KRX50101.1_T5	KRX84133.1_T6	KRX16167.1_T7	KRZ95479.1_T8	KRX61829.1_T9	KRY16256.1_T12	TP10608_T4	KRZ71403.1_T10	KRZ07378.1_T11
3270	EFV54865_T1	KRZ57624.1_T2	KRY53626.1_T3	KRX50060.1_T5	KRX84081.1_T6	KRX16139.1_T7	KRZ95407.1_T8	KRX61786.1_T9	KRY16274.1_T12	TP10600_T4	KRZ71364.1_T10	KRZ07368.1_T11
3271	EFV54893_T1	KRZ62636.1_T2	KRY45371.1_T3	KRX39339.1_T5	KRX61542.1_T6	KRX17273.1_T7	KRZ81973.1_T8	KRX59940.1_T9	KRY15581.1_T12	TP09662_T4	KRZ71713.1_T10	KRZ03307.1_T11
3272	EFV54894_T1	KRZ54425.1_T2	KRY47695.1_T3	KRX39332.1_T5	KRX82108.1_T6	KRX22504.1_T7	KRZ90967.1_T8	KRX53428.1_T9	KRY15541.1_T12	TP09688_T4	KRZ71704.1_T10	KRZ03297.1_T11
3273	EFV54898_T1	KRZ54438.1_T2	KRY47701.1_T3	KRX39344.1_T5	KRX82076.1_T6	KRX22536.1_T7	KRZ90985.1_T8	KRX53433.1_T9	KRY15593.1_T12	TP09682_T4	KRZ71701.1_T10	KRZ03304.1_T11
3274	EFV54907_T1	KRZ54414.1_T2	KRY47696.1_T3	KRX39321.1_T5	KRX82139.1_T6	KRX22532.1_T7	KRZ91023.1_T8	KRX53421.1_T9	KRY15574.1_T12	TP09675_T4	KRZ71706.1_T10	KRZ03302.1_T11
3275	EFV54914_T1	KRZ55383.1_T2	KRY46738.1_T3	KRX43878.1_T5	KRX84185.1_T6	KRX17305.1_T7	KRZ95417.1_T8	KRX56376.1_T9	KRY09547.1_T12	TP00945_T4	KRZ73875.1_T10	KRZ11678.1_T11
3276	EFV54917_T1	KRZ55356.1_T2	KRY46734.1_T3	KRX43844.1_T5	KRX84202.1_T6	KRX17258.1_T7	KRZ95439.1_T8	KRX56374.1_T9	KRY09545.1_T12	TP00947_T4	KRZ73914.1_T10	KRZ11687.1_T11
3277	EFV54922_T1	KRZ55382.1_T2	KRY46731.1_T3	KRX43860.1_T5	KRX84099.1_T6	KRX17277.1_T7	KRZ95542.1_T8	KRX56364.1_T9	KRY09546.1_T12	TP00952_T4	KRZ73870.1_T10	KRZ11729.1_T11
3278	EFV54930_T1	KRZ55379.1_T2	KRY48618.1_T3	KRX43862.1_T5	KRX84114.1_T6	KRX17289.1_T7	KRZ95420.1_T8	KRX59975.1_T9	KRY11763.1_T12	TP00942_T4	KRZ73946.1_T10	KRZ11720.1_T11
3279	EFV54932_T1	KRZ55357.1_T2	KRY48633.1_T3	KRX43842.1_T5	KRX84167.1_T6	KRX17256.1_T7	KRZ95471.1_T8	KRX59916.1_T9	KRY11760.1_T12	TP00943_T4	KRZ73941.1_T10	KRZ11677.1_T11
3280	EFV54942_T1	KRZ55376.1_T2	KRY48624.1_T3	KRX43851.1_T5	KRX84210.1_T6	KRX17272.1_T7	KRZ95418.1_T8	KRX59947.1_T9	KRY11753.1_T12	TP00937_T4	KRZ73907.1_T10	KRZ11733.1_T11
3281	EFV54943_T1	KRZ55374.1_T2	KRY48621.1_T3	KRX43873.1_T5	KRX84158.1_T6	KRX17275.1_T7	KRZ95432.1_T8	KRX59910.1_T9	KRY11752.1_T12	TP00938_T4	KRZ73932.1_T10	KRZ11737.1_T11
3282	EFV54949_T1	KRZ51334.1_T2	KRY46431.1_T3	KRX41293.1_T5	KRX70817.1_T6	KRX13617.1_T7	KRZ83246.1_T8	KRX52574.1_T9	KRY10122.1_T12	TP08869_T4	KRZ73909.1_T10	KRZ08782.1_T11
3283	EFV54952_T1	KRZ51321.1_T2	KRY46418.1_T3	KRX41310.1_T5	KRX70800.1_T6	KRX13612.1_T7	KRZ83226.1_T8	KRX52569.1_T9	KRY10130.1_T12	TP08870_T4	KRZ73890.1_T10	KRZ08807.1_T11
3284	EFV54953_T1	KRZ51331.1_T2	KRY46420.1_T3	KRX41267.1_T5	KRX70794.1_T6	KRX13607.1_T7	KRZ83238.1_T8	KRX52566.1_T9	KRY10144.1_T12	TP08871_T4	KRZ73928.1_T10	KRZ08795.1_T11
3285	EFV54957_T1	KRZ51346.1_T2	KRY46435.1_T3	KRX41312.1_T5	KRX70812.1_T6	KRX13610.1_T7	KRZ83232.1_T8	KRX52577.1_T9	KRY10129.1_T12	TP08876_T4	KRZ73882.1_T10	KRZ08811.1_T11
3286	EFV54983_T1	KRZ51333.1_T2	KRY46169.1_T3	KRX41294.1_T5	KRX70954.1_T6	KRX24615.1_T7	KRZ83426.1_T8	KRX51888.1_T9	KRY18391.1_T12	TP01259_T4	KRZ70001.1_T10	KRZ02128.1_T11
3287	EFV54986_T1	KRZ51341.1_T2	KRY46163.1_T3	KRX41302.1_T5	KRX70962.1_T6	KRX24669.1_T7	KRZ83432.1_T8	KRX53353.1_T9	KRY18372.1_T12	TP08849_T4	KRZ69994.1_T10	KRZ02138.1_T11
3288	EFV54989_T1	KRZ51322.1_T2	KRY46158.1_T3	KRX41271.1_T5	KRX70970.1_T6	KRX24595.1_T7	KRZ83439.1_T8	KRX53376.1_T9	KRY18396.1_T12	TP08851_T4	KRZ69999.1_T10	KRZ02130.1_T11
3289	EFV55010_T1	KRZ54016.1_T2	KRY50583.1_T3	KRX43153.1_T5	KRX83802.1_T6	KRX24627.1_T7	KRZ92263.1_T8	KRX61794.1_T9	KRY17911.1_T12	TP08832_T4	KRZ69991.1_T10	KRZ08773.1_T11
3290	EFV55016_T1	KRZ54004.1_T2	KRY50591.1_T3	KRX43158.1_T5	KRX83859.1_T6	KRX24668.1_T7	KRZ92200.1_T8	KRX61791.1_T9	KRY17886.1_T12	TP08839_T4	KRZ69982.1_T10	KRZ08770.1_T11
3292	EFV55041_T1	KRZ51565.1_T2	KRY45802.1_T3	KRX36181.1_T5	KRX79243.1_T6	KRX23532.1_T7	KRZ84181.1_T8	KRX52401.1_T9	KRY10449.1_T12	TP08943_T4	KRZ79260.1_T10	KRZ01808.1_T11
3293	EFV55046_T1	KRZ51561.1_T2	KRY45797.1_T3	KRX36186.1_T5	KRX79254.1_T6	KRX23494.1_T7	KRZ84177.1_T8	KRX52400.1_T9	KRY10441.1_T12	TP08947_T4	KRZ79206.1_T10	KRZ01801.1_T11
3294	EFV55048_T1	KRZ51570.1_T2	KRY45803.1_T3	KRX36183.1_T5	KRX79255.1_T6	KRX23575.1_T7	KRZ84183.1_T8	KRX52397.1_T9	KRY10456.1_T12	TP08948_T4	KRZ79223.1_T10	KRZ01804.1_T11
3296	EFV55060_T1	KRZ53147.1_T2	KRY57382.1_T3	KRX41728.1_T5	KRX79262.1_T6	KRX23498.1_T7	KRZ93974.1_T8	KRX54785.1_T9	KRY17909.1_T12	TP08914_T4	KRZ79337.1_T10	KRZ10399.1_T11
3297	EFV55062_T1	KRZ53124.1_T2	KRY57399.1_T3	KRX41708.1_T5	KRX79260.1_T6	KRX23587.1_T7	KRZ93965.1_T8	KRX54778.1_T9	KRY17869.1_T12	TP08918_T4	KRZ79320.1_T10	KRZ10417.1_T11
3298	EFV55064_T1	KRZ53128.1_T2	KRY57378.1_T3	KRX41701.1_T5	KRX79312.1_T6	KRX23572.1_T7	KRZ94071.1_T8	KRX54789.1_T9	KRY17893.1_T12	TP08920_T4	KRZ79387.1_T10	KRZ10383.1_T11
3299	EFV55065_T1	KRZ53125.1_T2	KRY57363.1_T3	KRX41724.1_T5	KRX79289.1_T6	KRX23501.1_T7	KRZ94010.1_T8	KRX54767.1_T9	KRY17920.1_T12	TP08921_T4	KRZ79389.1_T10	KRZ10396.1_T11
3300	EFV55070_T1	KRZ53144.1_T2	KRY57385.1_T3	KRX41707.1_T5	KRX79279.1_T6	KRX23507.1_T7	KRZ94048.1_T8	KRX54768.1_T9	KRY17891.1_T12	TP08926_T4	KRZ79394.1_T10	KRZ10436.1_T11
3301	EFV55074_T1	KRZ53119.1_T2	KRY57339.1_T3	KRX41732.1_T5	KRX79258.1_T6	KRX23525.1_T7	KRZ94000.1_T8	KRX54766.1_T9	KRY17914.1_T12	TP08931_T4	KRZ79341.1_T10	KRZ10381.1_T11
3302	EFV55076_T1	KRZ53133.1_T2	KRY57335.1_T3	KRX41712.1_T5	KRX79259.1_T6	KRX23483.1_T7	KRZ94074.1_T8	KRX54773.1_T9	KRY17900.1_T12	TP08934_T4	KRZ79367.1_T10	KRZ10375.1_T11
3303	EFV55077_T1	KRZ53134.1_T2	KRY57361.1_T3	KRX41737.1_T5	KRX79283.1_T6	KRX23509.1_T7	KRZ93976.1_T8	KRX54769.1_T9	KRY17883.1_T12	TP08935_T4	KRZ79408.1_T10	KRZ10443.1_T11
3304	EFV55087_T1	KRZ51564.1_T2	KRY46031.1_T3	KRX36079.1_T5	KRX79272.1_T6	KRX23553.1_T7	KRZ84192.1_T8	KRX52424.1_T9	KRY10457.1_T12	TP08942_T4	KRZ79334.1_T10	KRZ10425.1_T11
3305	EFV55117_T1	KRZ60525.1_T2	KRY57389.1_T3	KRX49442.1_T5	KRX83832.1_T6	KRX24744.1_T7	KRZ91818.1_T8	KRX63744.1_T9	KRY22231.1_T12	TP09637_T4	KRZ73458.1_T10	KRZ05358.1_T11
3306	EFV55133_T1	KRZ60550.1_T2	KRY57348.1_T3	KRX49433.1_T5	KRX83827.1_T6	KRX24674.1_T7	KRZ91785.1_T8	KRX63785.1_T9	KRY22224.1_T12	TP09658_T4	KRZ73466.1_T10	KRZ05371.1_T11
3307	EFV55134_T1	KRZ60486.1_T2	KRY57384.1_T3	KRX49446.1_T5	KRX83817.1_T6	KRX24743.1_T7	KRZ91805.1_T8	KRX63863.1_T9	KRY22162.1_T12	TP09655_T4	KRZ73474.1_T10	KRZ05355.1_T11
3308	EFV55139_T1	KRZ60555.1_T2	KRY57345.1_T3	KRX49434.1_T5	KRX83899.1_T6	KRX24614.1_T7	KRZ91852.1_T8	KRX63832.1_T9	KRY22226.1_T12	TP09651_T4	KRZ73497.1_T10	KRZ05350.1_T11
3309	EFV55147_T1	KRZ59514.1_T2	KRY57324.1_T3	KRX37269.1_T5	KRX70684.1_T6	KRX24683.1_T7	KRZ85993.1_T8	KRX54491.1_T9	KRY15585.1_T12	TP08668_T4	KRZ73874.1_T10	KRZ07882.1_T11
3310	EFV55151_T1	KRZ59465.1_T2	KRY57353.1_T3	KRX37274.1_T5	KRX70670.1_T6	KRX24593.1_T7	KRZ85992.1_T8	KRX54472.1_T9	KRY15538.1_T12	TP08655_T4	KRZ73937.1_T10	KRZ07897.1_T11
3311	EFV55162_T1	KRZ48663.1_T2	KRY45410.1_T3	KRX35514.1_T5	KRX70117.1_T6	KRX13038.1_T7	KRZ83184.1_T8	KRX52920.1_T9	KRY08250.1_T12	TP08674_T4	KRZ73916.1_T10	KRZ07895.1_T11
3312	EFV55163_T1	KRZ48666.1_T2	KRY45408.1_T3	KRX35512.1_T5	KRX70113.1_T6	KRX13036.1_T7	KRZ83200.1_T8	KRX52934.1_T9	KRY08243.1_T12	TP08673_T4	KRZ73898.1_T10	KRZ07859.1_T11
3314	EFV55174_T1	KRZ59486.1_T2	KRY55959.1_T3	KRX39193.1_T5	KRX76354.1_T6	KRX23488.1_T7	KRZ92242.1_T8	KRX56354.1_T9	KRY11127.1_T12	TP08708_T4	KRZ76634.1_T10	KRZ07878.1_T11
3315	EFV55196_T1	KRZ58750.1_T2	KRY47265.1_T3	KRX38406.1_T5	KRX76367.1_T6	KRX23590.1_T7	KRZ86021.1_T8	KRX63822.1_T9	KRY22101.1_T12	TP08693_T4	KRZ67980.1_T10	KRZ07863.1_T11
3316	EFV55197_T1	KRZ58804.1_T2	KRY47248.1_T3	KRX38410.1_T5	KRX76338.1_T6	KRX23518.1_T7	KRZ86004.1_T8	KRX63824.1_T9	KRY22213.1_T12	TP08694_T4	KRZ67978.1_T10	KRZ07900.1_T11
3317	EFV55198_T1	KRZ58752.1_T2	KRY47264.1_T3	KRX38401.1_T5	KRX76366.1_T6	KRX23516.1_T7	KRZ85978.1_T8	KRX63787.1_T9	KRY22118.1_T12	TP08695_T4	KRZ67977.1_T10	KRZ07898.1_T11
3318	EFV55199_T1	KRZ59509.1_T2	KRY55999.1_T3	KRX39204.1_T5	KRX76374.1_T6	KRX23549.1_T7	KRZ92224.1_T8	KRX56390.1_T9	KRY11120.1_T12	TP08696_T4	KRZ67985.1_T10	KRZ07858.1_T11
3319	EFV55200_T1	KRZ59463.1_T2	KRY55979.1_T3	KRX39219.1_T5	KRX76370.1_T6	KRX23490.1_T7	KRZ92257.1_T8	KRX56363.1_T9	KRY11109.1_T12	TP08697_T4	KRZ67988.1_T10	KRZ07890.1_T11
3320	EFV55201_T1	KRZ59466.1_T2	KRY55946.1_T3	KRX39207.1_T5	KRX76360.1_T6	KRX23583.1_T7	KRZ92195.1_T8	KRX56373.1_T9	KRY11122.1_T12	TP08699_T4	KRZ67992.1_T10	KRZ07902.1_T11
3321	EFV55203_T1	KRZ59491.1_T2	KRY55943.1_T3	KRX39218.1_T5	KRX76348.1_T6	KRX23511.1_T7	KRZ92246.1_T8	KRX56380.1_T9	KRY11111.1_T12	TP08701_T4	KRZ68001.1_T10	KRZ07908.1_T11
3322	EFV55204_T1	KRZ59524.1_T2	KRY56026.1_T3	KRX39191.1_T5	KRX76376.1_T6	KRX23611.1_T7	KRZ92205.1_T8	KRX56371.1_T9	KRY11119.1_T12	TP08703_T4	KRZ67983.1_T10	KRZ07884.1_T11
3323	EFV55209_T1	KRZ58806.1_T2	KRY47255.1_T3	KRX38411.1_T5	KRX76362.1_T6	KRX23504.1_T7	KRZ86000.1_T8	KRX63875.1_T9	KRY22182.1_T12	TP08678_T4	KRZ67991.1_T10	KRZ02907.1_T11
3324	EFV55210_T1	KRZ58766.1_T2	KRY47254.1_T3	KRX38408.1_T5	KRX76363.1_T6	KRX23537.1_T7	KRZ86022.1_T8	KRX63753.1_T9	KRY22151.1_T12	TP08679_T4	KRZ67997.1_T10	KRZ02897.1_T11
3326	EFV55230_T1	KRZ51587.1_T2	KRY55992.1_T3	KRX35155.1_T5	KRX75832.1_T6	KRX19440.1_T7	KRZ83189.1_T8	KRX52924.1_T9	KRY08306.1_T12	TP03308_T4	KRZ76675.1_T10	KRZ06447.1_T11
3328	EFV55265_T1	KRZ51884.1_T2	KRY49440.1_T3	KRX46590.1_T5	KRX83847.1_T6	KRX19396.1_T7	KRZ93643.1_T8	KRX53586.1_T9	KRY11448.1_T12	TP06168_T4	KRZ67926.1_T10	KRZ12325.1_T11
3329	EFV55270_T1	KRZ51872.1_T2	KRY49438.1_T3	KRX46572.1_T5	KRX83871.1_T6	KRX19427.1_T7	KRZ93597.1_T8	KRX53572.1_T9	KRY11431.1_T12	TP06170_T4	KRZ67924.1_T10	KRZ12333.1_T11
3330	EFV55273_T1	KRZ51885.1_T2	KRY49465.1_T3	KRX46603.1_T5	KRX83791.1_T6	KRX19406.1_T7	KRZ93682.1_T8	KRX53596.1_T9	KRY11428.1_T12	TP06173_T4	KRZ67923.1_T10	KRZ12341.1_T11
3331	EFV55278_T1	KRZ52269.1_T2	KRY51487.1_T3	KRX43438.1_T5	KRX78813.1_T6	KRX17743.1_T7	KRZ91032.1_T8	KRX66151.1_T9	KRY20488.1_T12	TP06213_T4	KRZ78884.1_T10	KRZ09389.1_T11
3332	EFV55279_T1	KRZ52272.1_T2	KRY51503.1_T3	KRX43445.1_T5	KRX78815.1_T6	KRX17707.1_T7	KRZ90958.1_T8	KRX66227.1_T9	KRY20559.1_T12	TP06212_T4	KRZ78902.1_T10	KRZ09373.1_T11
3333	EFV55280_T1	KRZ52278.1_T2	KRY51494.1_T3	KRX43455.1_T5	KRX78828.1_T6	KRX17724.1_T7	KRZ90961.1_T8	KRX66297.1_T9	KRY20555.1_T12	TP06211_T4	KRZ78915.1_T10	KRZ09381.1_T11
3334	EFV55281_T1	KRZ52281.1_T2	KRY51495.1_T3	KRX43464.1_T5	KRX78851.1_T6	KRX17742.1_T7	KRZ91022.1_T8	KRX66193.1_T9	KRY20489.1_T12	TP06210_T4	KRZ78891.1_T10	KRZ09375.1_T11
3335	EFV55285_T1	KRZ62626.1_T2	KRY51505.1_T3	KRX43440.1_T5	KRX78847.1_T6	KRX17722.1_T7	KRZ91007.1_T8	KRX53906.1_T9	KRY20522.1_T12	TP06206_T4	KRZ78964.1_T10	KRZ09371.1_T11
3337	EFV55291_T1	KRZ62645.1_T2	KRY51488.1_T3	KRX43450.1_T5	KRX78819.1_T6	KRX17718.1_T7	KRZ90995.1_T8	KRX53905.1_T9	KRY20551.1_T12	TP06201_T4	KRZ78921.1_T10	KRZ09387.1_T11
3338	EFV55293_T1	KRZ62684.1_T2	KRY51508.1_T3	KRX43466.1_T5	KRX78858.1_T6	KRX17701.1_T7	KRZ91030.1_T8	KRX53917.1_T9	KRY20554.1_T12	TP06199_T4	KRZ78924.1_T10	KRZ09385.1_T11
3339	EFV55295_T1	KRZ62631.1_T2	KRY51496.1_T3	KRX43461.1_T5	KRX78808.1_T6	KRX17699.1_T7	KRZ90976.1_T8	KRX53929.1_T9	KRY20514.1_T12	TP06197_T4	KRZ78952.1_T10	KRZ09377.1_T11
3341	EFV55310_T1	KRZ62603.1_T2	KRY48353.1_T3	KRX46586.1_T5	KRX78850.1_T6	KRX17750.1_T7	KRZ84652.1_T8	KRX54205.1_T9	KRY20576.1_T12	TP06183_T4	KRZ78888.1_T10	KRZ09368.1_T11
3343	EFV55314_T1	KRZ62685.1_T2	KRY48358.1_T3	KRX46604.1_T5	KRX78859.1_T6	KRX17749.1_T7	KRZ84647.1_T8	KRX54201.1_T9	KRY20560.1_T12	TP06181_T4	KRZ78855.1_T10	KRZ09367.1_T11
3344	EFV55318_T1	KRZ62691.1_T2	KRY48355.1_T3	KRX46599.1_T5	KRX78829.1_T6	KRX17758.1_T7	KRZ84659.1_T8	KRX54208.1_T9	KRY20518.1_T12	TP06178_T4	KRZ78900.1_T10	KRZ09380.1_T11
3345	EFV55330_T1	KRZ49846.1_T2	KRY46764.1_T3	KRX38178.1_T5	KRX75368.1_T6	KRX15277.1_T7	KRZ85628.1_T8	KRX61380.1_T9	KRY09666.1_T12	TP02675_T4	KRZ73457.1_T10	KRZ05236.1_T11
3346	EFV55332_T1	KRZ49839.1_T2	KRY46763.1_T3	KRX38166.1_T5	KRX75386.1_T6	KRX15296.1_T7	KRZ85621.1_T8	KRX61407.1_T9	KRY09665.1_T12	TP02676_T4	KRZ73491.1_T10	KRZ05254.1_T11
3347	EFV55333_T1	KRZ49837.1_T2	KRY46769.1_T3	KRX38158.1_T5	KRX75355.1_T6	KRX15272.1_T7	KRZ85642.1_T8	KRX61396.1_T9	KRY09664.1_T12	TP02677_T4	KRZ73462.1_T10	KRZ05216.1_T11
3348	EFV55334_T1	KRZ50047.1_T2	KRY47392.1_T3	KRX39690.1_T5	KRX75387.1_T6	KRX15276.1_T7	KRZ85638.1_T8	KRX61399.1_T9	KRY10100.1_T12	TP02678_T4	KRZ73492.1_T10	KRZ05223.1_T11
3349	EFV55335_T1	KRZ50036.1_T2	KRY47398.1_T3	KRX39678.1_T5	KRX75392.1_T6	KRX15268.1_T7	KRZ85631.1_T8	KRX61429.1_T9	KRY10095.1_T12	TP02679_T4	KRZ73488.1_T10	KRZ05240.1_T11
3351	EFV55345_T1	KRZ50046.1_T2	KRY47389.1_T3	KRX39673.1_T5	KRX75372.1_T6	KRX15278.1_T7	KRZ85624.1_T8	KRX61449.1_T9	KRY10096.1_T12	TP06221_T4	KRZ73435.1_T10	KRZ05250.1_T11
3352	EFV55347_T1	KRZ50050.1_T2	KRY47412.1_T3	KRX39670.1_T5	KRX75369.1_T6	KRX15283.1_T7	KRZ85618.1_T8	KRX61414.1_T9	KRY10078.1_T12	TP06218_T4	KRZ73464.1_T10	KRZ05218.1_T11
3354	EFV55357_T1	KRZ58788.1_T2	KRY58675.1_T3	KRX44186.1_T5	KRX80309.1_T6	KRX16924.1_T7	KRZ93612.1_T8	KRX65502.1_T9	KRY17534.1_T12	TP12374_T4	KRZ78958.1_T10	KRZ06299.1_T11
3355	EFV55358_T1	KRZ58795.1_T2	KRY58671.1_T3	KRX44187.1_T5	KRX80260.1_T6	KRX16894.1_T7	KRZ93613.1_T8	KRX65513.1_T9	KRY17547.1_T12	TP12372_T4	KRZ78889.1_T10	KRZ06284.1_T11
3356	EFV55359_T1	KRZ58783.1_T2	KRY58679.1_T3	KRX44169.1_T5	KRX80300.1_T6	KRX16895.1_T7	KRZ93573.1_T8	KRX65553.1_T9	KRY17536.1_T12	TP12370_T4	KRZ78976.1_T10	KRZ06283.1_T11
3357	EFV55360_T1	KRZ58761.1_T2	KRY58642.1_T3	KRX44177.1_T5	KRX80270.1_T6	KRX16897.1_T7	KRZ93633.1_T8	KRX65519.1_T9	KRY17558.1_T12	TP12369_T4	KRZ78852.1_T10	KRZ06291.1_T11
3358	EFV55363_T1	KRZ58776.1_T2	KRY58686.1_T3	KRX44194.1_T5	KRX80247.1_T6	KRX16933.1_T7	KRZ93684.1_T8	KRX65567.1_T9	KRY17554.1_T12	TP12364_T4	KRZ78978.1_T10	KRZ06257.1_T11
3359	EFV55364_T1	KRZ58778.1_T2	KRY58663.1_T3	KRX44199.1_T5	KRX80263.1_T6	KRX16901.1_T7	KRZ93659.1_T8	KRX65506.1_T9	KRY17527.1_T12	TP12363_T4	KRZ78940.1_T10	KRZ06279.1_T11
3360	EFV55373_T1	KRZ58756.1_T2	KRY58680.1_T3	KRX44171.1_T5	KRX80302.1_T6	KRX16935.1_T7	KRZ93647.1_T8	KRX65500.1_T9	KRY17520.1_T12	TP12389_T4	KRZ78858.1_T10	KRZ06301.1_T11
3361	EFV55387_T1	KRZ58786.1_T2	KRY58713.1_T3	KRX44173.1_T5	KRX80293.1_T6	KRX16906.1_T7	KRZ93678.1_T8	KRX65571.1_T9	KRY17514.1_T12	TP12380_T4	KRZ78960.1_T10	KRZ06298.1_T11
3362	EFV55406_T1	KRZ50059.1_T2	KRY58710.1_T3	KRX37907.1_T5	KRX71232.1_T6	KRX13679.1_T7	KRZ93628.1_T8	KRX65626.1_T9	KRY17532.1_T12	TP03786_T4	KRZ68692.1_T10	KRZ04987.1_T11
3363	EFV55445_T1	KRZ52949.1_T2	KRY49651.1_T3	KRX49111.1_T5	KRX74406.1_T6	KRX19186.1_T7	KRZ85474.1_T8	KRX59458.1_T9	KRY23587.1_T12	TP05028_T4	KRZ68823.1_T10	KRZ13188.1_T11
3364	EFV55446_T1	KRZ52942.1_T2	KRY49650.1_T3	KRX49121.1_T5	KRX74405.1_T6	KRX19178.1_T7	KRZ85496.1_T8	KRX59445.1_T9	KRY23621.1_T12	TP05029_T4	KRZ68807.1_T10	KRZ13212.1_T11
3365	EFV55452_T1	KRZ52936.1_T2	KRY49618.1_T3	KRX49101.1_T5	KRX74400.1_T6	KRX19170.1_T7	KRZ85483.1_T8	KRX59432.1_T9	KRY23600.1_T12	TP05037_T4	KRZ68827.1_T10	KRZ13181.1_T11
3366	EFV55453_T1	KRZ52925.1_T2	KRY49624.1_T3	KRX49081.1_T5	KRX74392.1_T6	KRX19213.1_T7	KRZ85497.1_T8	KRX59433.1_T9	KRY23583.1_T12	TP05038_T4	KRZ68829.1_T10	KRZ13189.1_T11
3367	EFV55454_T1	KRZ52939.1_T2	KRY49625.1_T3	KRX49139.1_T5	KRX74382.1_T6	KRX19215.1_T7	KRZ85477.1_T8	KRX59426.1_T9	KRY23624.1_T12	TP05039_T4	KRZ68813.1_T10	KRZ13221.1_T11
3368	EFV55457_T1	KRZ52938.1_T2	KRY49635.1_T3	KRX49116.1_T5	KRX74403.1_T6	KRX19155.1_T7	KRZ85506.1_T8	KRX59423.1_T9	KRY23741.1_T12	TP05045_T4	KRZ68806.1_T10	KRZ13146.1_T11
3369	EFV55461_T1	KRZ52943.1_T2	KRY49622.1_T3	KRX49086.1_T5	KRX74379.1_T6	KRX19160.1_T7	KRZ85495.1_T8	KRX59464.1_T9	KRY23693.1_T12	TP05049_T4	KRZ68809.1_T10	KRZ13156.1_T11
3370	EFV55462_T1	KRZ52931.1_T2	KRY49645.1_T3	KRX49119.1_T5	KRX74397.1_T6	KRX19216.1_T7	KRZ85508.1_T8	KRX59451.1_T9	KRY23677.1_T12	TP05051_T4	KRZ68831.1_T10	KRZ13200.1_T11
3371	EFV55471_T1	KRZ56743.1_T2	KRY52668.1_T3	KRX49074.1_T5	KRX79766.1_T6	KRX19822.1_T7	KRZ94062.1_T8	KRX65561.1_T9	KRY23657.1_T12	TP05023_T4	KRZ76469.1_T10	KRZ13214.1_T11
3372	EFV55482_T1	KRZ56728.1_T2	KRY52702.1_T3	KRX49090.1_T5	KRX79715.1_T6	KRX19760.1_T7	KRZ94013.1_T8	KRX65569.1_T9	KRY23708.1_T12	TP05017_T4	KRZ76404.1_T10	KRZ13176.1_T11
3373	EFV55484_T1	KRZ56772.1_T2	KRY52683.1_T3	KRX49108.1_T5	KRX79731.1_T6	KRX19811.1_T7	KRZ94019.1_T8	KRX65609.1_T9	KRY23749.1_T12	TP05018_T4	KRZ76489.1_T10	KRZ13210.1_T11
3374	EFV55485_T1	KRZ56742.1_T2	KRY52697.1_T3	KRX49143.1_T5	KRX79788.1_T6	KRX19786.1_T7	KRZ93968.1_T8	KRX65606.1_T9	KRY23605.1_T12	TP05019_T4	KRZ76467.1_T10	KRZ13180.1_T11
3375	EFV55486_T1	KRZ56734.1_T2	KRY52713.1_T3	KRX49083.1_T5	KRX79786.1_T6	KRX19766.1_T7	KRZ94069.1_T8	KRX65494.1_T9	KRY23729.1_T12	TP05020_T4	KRZ76444.1_T10	KRZ13222.1_T11
3376	EFV55494_T1	KRZ56751.1_T2	KRY52704.1_T3	KRX49146.1_T5	KRX79780.1_T6	KRX19769.1_T7	KRZ94068.1_T8	KRX54689.1_T9	KRY23598.1_T12	TP04994_T4	KRZ76438.1_T10	KRZ13216.1_T11
3377	EFV55505_T1	KRZ56738.1_T2	KRY52685.1_T3	KRX49073.1_T5	KRX79718.1_T6	KRX19788.1_T7	KRZ94077.1_T8	KRX65508.1_T9	KRY23752.1_T12	TP05003_T4	KRZ76417.1_T10	KRZ13185.1_T11
3378	EFV55506_T1	KRZ56770.1_T2	KRY52703.1_T3	KRX49076.1_T5	KRX79717.1_T6	KRX19772.1_T7	KRZ94040.1_T8	KRX65618.1_T9	KRY23707.1_T12	TP05006_T4	KRZ76445.1_T10	KRZ13187.1_T11
3379	EFV55507_T1	KRZ56739.1_T2	KRY52717.1_T3	KRX49140.1_T5	KRX79744.1_T6	KRX19838.1_T7	KRZ93984.1_T8	KRX65603.1_T9	KRY23611.1_T12	TP05007_T4	KRZ76447.1_T10	KRZ13226.1_T11
3380	EFV55517_T1	KRZ61106.1_T2	KRY58299.1_T3	KRX43764.1_T5	KRX73092.1_T6	KRX26952.1_T7	KRZ88205.1_T8	KRX56411.1_T9	KRY22141.1_T12	TP04981_T4	KRZ72321.1_T10	KRZ13191.1_T11
3381	EFV55518_T1	KRZ61081.1_T2	KRY58306.1_T3	KRX43768.1_T5	KRX73097.1_T6	KRX26875.1_T7	KRZ88236.1_T8	KRX56407.1_T9	KRY22110.1_T12	TP04985_T4	KRZ72327.1_T10	KRZ13228.1_T11
3382	EFV55521_T1	KRZ61062.1_T2	KRY58359.1_T3	KRX43756.1_T5	KRX73093.1_T6	KRX26888.1_T7	KRZ88203.1_T8	KRX56423.1_T9	KRY22153.1_T12	TP04989_T4	KRZ72364.1_T10	KRZ13152.1_T11
3383	EFV55524_T1	KRZ49370.1_T2	KRY58344.1_T3	KRX43789.1_T5	KRX83358.1_T6	KRX27044.1_T7	KRZ88222.1_T8	KRX56404.1_T9	KRY22129.1_T12	TP03776_T4	KRZ68684.1_T10	KRZ04963.1_T11
3384	EFV55527_T1	KRZ49378.1_T2	KRY58331.1_T3	KRX43748.1_T5	KRX83272.1_T6	KRX26856.1_T7	KRZ88239.1_T8	KRX56405.1_T9	KRY22191.1_T12	TP03779_T4	KRZ68677.1_T10	KRZ04965.1_T11
3385	EFV55533_T1	KRZ50099.1_T2	KRY58323.1_T3	KRX43780.1_T5	KRX73085.1_T6	KRX26934.1_T7	KRZ88211.1_T8	KRX56417.1_T9	KRY22117.1_T12	TP04972_T4	KRZ72376.1_T10	KRZ13172.1_T11
3386	EFV55535_T1	KRZ50094.1_T2	KRY58281.1_T3	KRX43785.1_T5	KRX73089.1_T6	KRX26999.1_T7	KRZ88248.1_T8	KRX56415.1_T9	KRY22214.1_T12	TP04973_T4	KRZ72365.1_T10	KRZ13213.1_T11
3387	EFV55536_T1	KRZ50098.1_T2	KRY58362.1_T3	KRX43757.1_T5	KRX73084.1_T6	KRX26840.1_T7	KRZ88252.1_T8	KRX56419.1_T9	KRY22233.1_T12	TP04974_T4	KRZ72331.1_T10	KRZ13192.1_T11
3388	EFV55539_T1	KRZ50091.1_T2	KRY58291.1_T3	KRX43759.1_T5	KRX73087.1_T6	KRX26942.1_T7	KRZ88221.1_T8	KRX56410.1_T9	KRY22238.1_T12	TP04977_T4	KRZ72325.1_T10	KRZ13193.1_T11
3389	EFV55547_T1	KRZ62234.1_T2	KRY58311.1_T3	KRX45848.1_T5	KRX70874.1_T6	KRX27060.1_T7	KRZ83304.1_T8	KRX59456.1_T9	KRY11658.1_T12	TP03752_T4	KRZ71695.1_T10	KRZ12334.1_T11
3390	EFV55552_T1	KRZ62220.1_T2	KRY58351.1_T3	KRX45842.1_T5	KRX70868.1_T6	KRX26956.1_T7	KRZ83306.1_T8	KRX59425.1_T9	KRY11646.1_T12	TP03756_T4	KRZ71712.1_T10	KRZ12373.1_T11
3391	EFV55563_T1	KRZ62167.1_T2	KRY58356.1_T3	KRX45388.1_T5	KRX83335.1_T6	KRX26852.1_T7	KRZ88244.1_T8	KRX59414.1_T9	KRY11648.1_T12	TP03770_T4	KRZ71692.1_T10	KRZ12382.1_T11
3392	EFV55575_T1	KRZ62195.1_T2	KRY49596.1_T3	KRX45854.1_T5	KRX79855.1_T6	KRX27013.1_T7	KRZ92394.1_T8	KRX59934.1_T9	KRY23664.1_T12	TP03726_T4	KRZ76683.1_T10	KRZ12386.1_T11
3393	EFV55578_T1	KRZ62192.1_T2	KRY49605.1_T3	KRX45858.1_T5	KRX79799.1_T6	KRX26910.1_T7	KRZ92400.1_T8	KRX59931.1_T9	KRY23569.1_T12	TP03730_T4	KRZ76633.1_T10	KRZ12385.1_T11
3394	EFV55580_T1	KRZ62179.1_T2	KRY49583.1_T3	KRX45860.1_T5	KRX79803.1_T6	KRX26959.1_T7	KRZ92378.1_T8	KRX59966.1_T9	KRY23753.1_T12	TP03734_T4	KRZ76663.1_T10	KRZ12380.1_T11
3395	EFV55584_T1	KRZ62241.1_T2	KRY49603.1_T3	KRX45833.1_T5	KRX79817.1_T6	KRX27055.1_T7	KRZ92461.1_T8	KRX59976.1_T9	KRY23649.1_T12	TP03738_T4	KRZ76652.1_T10	KRZ12369.1_T11
3396	EFV55586_T1	KRZ62221.1_T2	KRY49588.1_T3	KRX45874.1_T5	KRX79810.1_T6	KRX27072.1_T7	KRZ92429.1_T8	KRX59908.1_T9	KRY23659.1_T12	TP03739_T4	KRZ76597.1_T10	KRZ12378.1_T11
3397	EFV55589_T1	KRZ62180.1_T2	KRY49597.1_T3	KRX45822.1_T5	KRX79793.1_T6	KRX26900.1_T7	KRZ92484.1_T8	KRX59960.1_T9	KRY23774.1_T12	TP03744_T4	KRZ76709.1_T10	KRZ12340.1_T11
3398	EFV55596_T1	KRZ52625.1_T2	KRY58369.1_T3	KRX48377.1_T5	KRX73163.1_T6	KRX27067.1_T7	KRZ92424.1_T8	KRX54402.1_T9	KRY11984.1_T12	TP09506_T4	KRZ72328.1_T10	KRZ11740.1_T11
3399	EFV55597_T1	KRZ52657.1_T2	KRY58348.1_T3	KRX48373.1_T5	KRX73162.1_T6	KRX27054.1_T7	KRZ92464.1_T8	KRX54397.1_T9	KRY11996.1_T12	TP09504_T4	KRZ72332.1_T10	KRZ11725.1_T11
3400	EFV55599_T1	KRZ52634.1_T2	KRY58305.1_T3	KRX48334.1_T5	KRX73167.1_T6	KRX26920.1_T7	KRZ92395.1_T8	KRX54428.1_T9	KRY12002.1_T12	TP09502_T4	KRZ72351.1_T10	KRZ11728.1_T11
3401	EFV55602_T1	KRZ52647.1_T2	KRY58284.1_T3	KRX48342.1_T5	KRX73168.1_T6	KRX26833.1_T7	KRZ92452.1_T8	KRX54399.1_T9	KRY11988.1_T12	TP09497_T4	KRZ72334.1_T10	KRZ11692.1_T11
3403	EFV55607_T1	KRZ52631.1_T2	KRY58270.1_T3	KRX48316.1_T5	KRX73142.1_T6	KRX27017.1_T7	KRZ92485.1_T8	KRX54429.1_T9	KRY12004.1_T12	TP09488_T4	KRZ72349.1_T10	KRZ11727.1_T11
3404	EFV55608_T1	KRZ52653.1_T2	KRY58343.1_T3	KRX48390.1_T5	KRX73176.1_T6	KRX26902.1_T7	KRZ92483.1_T8	KRX54413.1_T9	KRY12009.1_T12	TP09487_T4	KRZ72345.1_T10	KRZ11686.1_T11
3406	EFV55618_T1	KRZ60711.1_T2	KRY55069.1_T3	KRX43630.1_T5	KRX82413.1_T6	KRX19816.1_T7	KRZ90404.1_T8	KRX56333.1_T9	KRY13534.1_T12	TP09531_T4	KRZ66642.1_T10	KRZ11682.1_T11
3407	EFV55619_T1	KRZ60708.1_T2	KRY55106.1_T3	KRX43652.1_T5	KRX82464.1_T6	KRX19787.1_T7	KRZ90399.1_T8	KRX56313.1_T9	KRY13514.1_T12	TP09530_T4	KRZ66641.1_T10	KRZ11706.1_T11
3408	EFV55621_T1	KRZ60707.1_T2	KRY55118.1_T3	KRX43658.1_T5	KRX82409.1_T6	KRX19767.1_T7	KRZ90397.1_T8	KRX56348.1_T9	KRY13539.1_T12	TP09528_T4	KRZ76487.1_T10	KRZ06653.1_T11
3409	EFV55623_T1	KRZ60683.1_T2	KRY55102.1_T3	KRX43634.1_T5	KRX82452.1_T6	KRX19757.1_T7	KRZ90325.1_T8	KRX56331.1_T9	KRY13499.1_T12	TP09523_T4	KRZ76405.1_T10	KRZ06628.1_T11
3410	EFV55624_T1	KRZ60671.1_T2	KRY55122.1_T3	KRX43655.1_T5	KRX82513.1_T6	KRX19768.1_T7	KRZ90375.1_T8	KRX56341.1_T9	KRY13502.1_T12	TP09522_T4	KRZ76481.1_T10	KRZ06674.1_T11
3411	EFV55627_T1	KRZ60748.1_T2	KRY55072.1_T3	KRX43639.1_T5	KRX82499.1_T6	KRX19778.1_T7	KRZ90328.1_T8	KRX56345.1_T9	KRY13531.1_T12	TP09516_T4	KRZ76411.1_T10	KRZ06649.1_T11
3412	EFV55628_T1	KRZ60692.1_T2	KRY55084.1_T3	KRX43641.1_T5	KRX82392.1_T6	KRX19756.1_T7	KRZ90386.1_T8	KRX56338.1_T9	KRY13505.1_T12	TP09515_T4	KRZ76472.1_T10	KRZ06648.1_T11
3413	EFV55632_T1	KRZ60681.1_T2	KRY55104.1_T3	KRX43653.1_T5	KRX82402.1_T6	KRX19817.1_T7	KRZ90347.1_T8	KRX56324.1_T9	KRY13551.1_T12	TP09513_T4	KRZ76449.1_T10	KRZ06669.1_T11
3414	EFV55633_T1	KRZ60693.1_T2	KRY55073.1_T3	KRX43640.1_T5	KRX82471.1_T6	KRX19782.1_T7	KRZ90367.1_T8	KRX56332.1_T9	KRY13504.1_T12	TP09511_T4	KRZ76388.1_T10	KRZ06630.1_T11
3415	EFV55651_T1	KRZ60695.1_T2	KRY51048.1_T3	KRX48345.1_T5	KRX82444.1_T6	KRX21871.1_T7	KRZ90351.1_T8	KRX68638.1_T9	KRY13726.1_T12	TP04952_T4	KRZ74669.1_T10	KRZ06018.1_T11
3416	EFV55652_T1	KRZ60742.1_T2	KRY51044.1_T3	KRX48356.1_T5	KRX82508.1_T6	KRX21852.1_T7	KRZ90376.1_T8	KRX68957.1_T9	KRY13729.1_T12	TP04953_T4	KRZ74623.1_T10	KRZ06027.1_T11
3417	EFV55653_T1	KRZ60663.1_T2	KRY51016.1_T3	KRX48353.1_T5	KRX82437.1_T6	KRX21880.1_T7	KRZ90405.1_T8	KRX68745.1_T9	KRY13715.1_T12	TP04954_T4	KRZ74640.1_T10	KRZ06000.1_T11
3418	EFV55654_T1	KRZ60672.1_T2	KRY51031.1_T3	KRX48364.1_T5	KRX82506.1_T6	KRX21879.1_T7	KRZ90326.1_T8	KRX68964.1_T9	KRY13747.1_T12	TP04955_T4	KRZ74625.1_T10	KRZ06004.1_T11
3419	EFV55655_T1	KRZ60688.1_T2	KRY51014.1_T3	KRX48372.1_T5	KRX82500.1_T6	KRX21857.1_T7	KRZ90388.1_T8	KRX68575.1_T9	KRY13755.1_T12	TP04956_T4	KRZ74646.1_T10	KRZ06002.1_T11
3420	EFV55657_T1	KRZ60743.1_T2	KRY51019.1_T3	KRX48376.1_T5	KRX82490.1_T6	KRX21901.1_T7	KRZ90340.1_T8	KRX68923.1_T9	KRY13740.1_T12	TP04959_T4	KRZ74663.1_T10	KRZ06008.1_T11
3421	EFV55658_T1	KRZ60715.1_T2	KRY51029.1_T3	KRX48388.1_T5	KRX82515.1_T6	KRX21882.1_T7	KRZ90381.1_T8	KRX68886.1_T9	KRY13730.1_T12	TP04960_T4	KRZ74684.1_T10	KRZ05994.1_T11
3422	EFV55659_T1	KRZ60703.1_T2	KRY51051.1_T3	KRX48387.1_T5	KRX82475.1_T6	KRX21791.1_T7	KRZ90391.1_T8	KRX69009.1_T9	KRY13752.1_T12	TP04961_T4	KRZ74676.1_T10	KRZ05988.1_T11
3424	EFV55682_T1	KRZ55085.1_T2	KRY51349.1_T3	KRX44014.1_T5	KRX78556.1_T6	KRX16618.1_T7	KRZ86810.1_T8	KRX64165.1_T9	KRY14011.1_T12	TP01828_T4	KRZ74649.1_T10	KRZ03086.1_T11
3425	EFV55686_T1	KRZ55091.1_T2	KRY51325.1_T3	KRX44032.1_T5	KRX78568.1_T6	KRX16590.1_T7	KRZ86808.1_T8	KRX64180.1_T9	KRY14024.1_T12	TP01823_T4	KRZ74645.1_T10	KRZ03077.1_T11
3426	EFV55688_T1	KRZ55100.1_T2	KRY51340.1_T3	KRX44017.1_T5	KRX78543.1_T6	KRX16638.1_T7	KRZ86794.1_T8	KRX64272.1_T9	KRY13997.1_T12	TP01821_T4	KRZ74652.1_T10	KRZ03091.1_T11
3428	EFV55708_T1	KRZ55101.1_T2	KRY51345.1_T3	KRX44013.1_T5	KRX78576.1_T6	KRX16624.1_T7	KRZ86826.1_T8	KRX64285.1_T9	KRY14029.1_T12	TP01847_T4	KRZ74636.1_T10	KRZ14025.1_T11
3429	EFV55710_T1	KRZ55090.1_T2	KRY51309.1_T3	KRX44016.1_T5	KRX78551.1_T6	KRX16630.1_T7	KRZ86774.1_T8	KRX64155.1_T9	KRY14017.1_T12	TP01846_T4	KRZ74694.1_T10	KRZ13956.1_T11
3430	EFV55713_T1	KRZ55073.1_T2	KRY51332.1_T3	KRX44018.1_T5	KRX78521.1_T6	KRX16617.1_T7	KRZ86815.1_T8	KRX64283.1_T9	KRY14019.1_T12	TP01845_T4	KRZ74628.1_T10	KRZ14001.1_T11
3431	EFV55715_T1	KRZ55069.1_T2	KRY51319.1_T3	KRX44031.1_T5	KRX78513.1_T6	KRX16611.1_T7	KRZ86779.1_T8	KRX64261.1_T9	KRY14010.1_T12	TP01843_T4	KRZ74698.1_T10	KRZ13993.1_T11
3432	EFV55718_T1	KRZ55079.1_T2	KRY51355.1_T3	KRX44051.1_T5	KRX78520.1_T6	KRX16604.1_T7	KRZ86818.1_T8	KRX64181.1_T9	KRY13989.1_T12	TP01840_T4	KRZ74660.1_T10	KRZ14010.1_T11
3433	EFV55720_T1	KRZ55071.1_T2	KRY51316.1_T3	KRX44028.1_T5	KRX78563.1_T6	KRX16625.1_T7	KRZ86812.1_T8	KRX64252.1_T9	KRY13990.1_T12	TP01838_T4	KRZ74613.1_T10	KRZ14004.1_T11
3434	EFV55726_T1	KRZ61898.1_T2	KRY53681.1_T3	KRX39699.1_T5	KRX79061.1_T6	KRX17483.1_T7	KRZ95721.1_T8	KRX64193.1_T9	KRY12021.1_T12	TP01866_T4	KRZ67874.1_T10	KRZ03762.1_T11
3435	EFV55729_T1	KRZ61989.1_T2	KRY53672.1_T3	KRX39716.1_T5	KRX79050.1_T6	KRX17460.1_T7	KRZ95580.1_T8	KRX64219.1_T9	KRY12039.1_T12	TP01863_T4	KRZ67875.1_T10	KRZ03763.1_T11
3436	EFV55730_T1	KRZ61968.1_T2	KRY53716.1_T3	KRX39698.1_T5	KRX79070.1_T6	KRX17493.1_T7	KRZ95694.1_T8	KRX64170.1_T9	KRY12041.1_T12	TP01862_T4	KRZ67881.1_T10	KRZ03766.1_T11
3437	EFV55732_T1	KRZ61955.1_T2	KRY53702.1_T3	KRX39700.1_T5	KRX79055.1_T6	KRX17482.1_T7	KRZ95563.1_T8	KRX64198.1_T9	KRY12030.1_T12	TP01861_T4	KRZ67873.1_T10	KRZ03737.1_T11
3438	EFV55734_T1	KRZ61920.1_T2	KRY53731.1_T3	KRX39719.1_T5	KRX79051.1_T6	KRX17480.1_T7	KRZ95620.1_T8	KRX64217.1_T9	KRY12022.1_T12	TP01860_T4	KRZ67878.1_T10	KRZ03738.1_T11
3439	EFV55741_T1	KRZ61971.1_T2	KRY53733.1_T3	KRX39708.1_T5	KRX79085.1_T6	KRX17458.1_T7	KRZ95646.1_T8	KRX64282.1_T9	KRY12018.1_T12	TP01868_T4	KRZ67869.1_T10	KRZ03745.1_T11
3440	EFV55768_T1	KRZ50381.1_T2	KRY47102.1_T3	KRX37747.1_T5	KRX84407.1_T6	KRX13911.1_T7	KRZ87590.1_T8	KRX64234.1_T9	KRY09831.1_T12	TP01880_T4	KRZ67072.1_T10	KRZ13982.1_T11
3441	EFV55769_T1	KRZ50375.1_T2	KRY47100.1_T3	KRX37749.1_T5	KRX84456.1_T6	KRX13895.1_T7	KRZ87624.1_T8	KRX64192.1_T9	KRY09846.1_T12	TP01881_T4	KRZ67062.1_T10	KRZ14017.1_T11
3442	EFV55778_T1	KRZ50380.1_T2	KRY47091.1_T3	KRX37743.1_T5	KRX84496.1_T6	KRX13914.1_T7	KRZ87583.1_T8	KRX64238.1_T9	KRY09839.1_T12	TP01892_T4	KRZ67065.1_T10	KRZ13965.1_T11
3443	EFV55783_T1	KRZ50393.1_T2	KRY47090.1_T3	KRX37745.1_T5	KRX69399.1_T6	KRX13908.1_T7	KRZ87614.1_T8	KRX64256.1_T9	KRY09838.1_T12	TP01897_T4	KRZ67075.1_T10	KRZ13941.1_T11
3444	EFV55805_T1	KRZ53492.1_T2	KRY60682.1_T3	KRX41940.1_T5	KRX74515.1_T6	KRX15768.1_T7	KRZ92377.1_T8	KRX64478.1_T9	KRY17152.1_T12	TP01942_T4	KRZ73555.1_T10	KRZ14026.1_T11
3445	EFV55806_T1	KRZ53489.1_T2	KRY60791.1_T3	KRX41933.1_T5	KRX74539.1_T6	KRX15760.1_T7	KRZ92466.1_T8	KRX64451.1_T9	KRY17151.1_T12	TP01940_T4	KRZ73533.1_T10	KRZ13928.1_T11
3446	EFV55810_T1	KRZ53481.1_T2	KRY60677.1_T3	KRX41939.1_T5	KRX74522.1_T6	KRX15756.1_T7	KRZ92468.1_T8	KRX64482.1_T9	KRY17154.1_T12	TP01933_T4	KRZ73513.1_T10	KRZ13987.1_T11
3447	EFV55815_T1	KRZ53488.1_T2	KRY60652.1_T3	KRX41948.1_T5	KRX74544.1_T6	KRX15764.1_T7	KRZ92389.1_T8	KRX64496.1_T9	KRY17163.1_T12	TP01928_T4	KRZ73552.1_T10	KRZ14008.1_T11
3448	EFV55818_T1	KRZ53479.1_T2	KRY60855.1_T3	KRX41935.1_T5	KRX74533.1_T6	KRX15758.1_T7	KRZ92474.1_T8	KRX64484.1_T9	KRY17136.1_T12	TP01927_T4	KRZ73503.1_T10	KRZ14021.1_T11
3449	EFV55819_T1	KRZ53478.1_T2	KRY60687.1_T3	KRX41953.1_T5	KRX74548.1_T6	KRX15770.1_T7	KRZ92480.1_T8	KRX64462.1_T9	KRY17127.1_T12	TP01926_T4	KRZ73531.1_T10	KRZ13975.1_T11
3450	EFV55820_T1	KRZ53468.1_T2	KRY60818.1_T3	KRX41930.1_T5	KRX74526.1_T6	KRX15772.1_T7	KRZ92475.1_T8	KRX64454.1_T9	KRY17131.1_T12	TP01925_T4	KRZ73515.1_T10	KRZ14011.1_T11
3452	EFV55850_T1	KRZ54748.1_T2	KRY60706.1_T3	KRX45217.1_T5	KRX84410.1_T6	KRX18632.1_T7	KRZ89526.1_T8	KRX56094.1_T9	KRY20239.1_T12	TP01992_T4	KRZ73522.1_T10	KRZ09353.1_T11
3453	EFV55858_T1	KRZ54756.1_T2	KRY60829.1_T3	KRX45228.1_T5	KRX84387.1_T6	KRX18594.1_T7	KRZ89574.1_T8	KRX56073.1_T9	KRY20192.1_T12	TP01987_T4	KRZ73516.1_T10	KRZ09349.1_T11
3454	EFV55867_T1	KRZ54763.1_T2	KRY60835.1_T3	KRX45225.1_T5	KRX84393.1_T6	KRX18621.1_T7	KRZ89561.1_T8	KRX56092.1_T9	KRY20247.1_T12	TP01978_T4	KRZ73525.1_T10	KRZ09336.1_T11
3455	EFV55868_T1	KRZ54747.1_T2	KRY60767.1_T3	KRX45209.1_T5	KRX84411.1_T6	KRX18582.1_T7	KRZ89530.1_T8	KRX56089.1_T9	KRY20169.1_T12	TP01976_T4	KRZ73557.1_T10	KRZ09329.1_T11
3456	EFV55884_T1	KRZ55539.1_T2	KRY48427.1_T3	KRX38947.1_T5	KRX72544.1_T6	KRX14135.1_T7	KRZ85120.1_T8	KRX59777.1_T9	KRY17149.1_T12	TP01966_T4	KRZ67170.1_T10	KRZ09320.1_T11
3457	EFV55887_T1	KRZ55506.1_T2	KRY48439.1_T3	KRX38932.1_T5	KRX72528.1_T6	KRX14149.1_T7	KRZ85110.1_T8	KRX59763.1_T9	KRY17137.1_T12	TP01965_T4	KRZ67176.1_T10	KRZ09346.1_T11
3458	EFV55888_T1	KRZ55542.1_T2	KRY48434.1_T3	KRX38944.1_T5	KRX72540.1_T6	KRX14151.1_T7	KRZ85115.1_T8	KRX59786.1_T9	KRY17166.1_T12	TP01964_T4	KRZ67179.1_T10	KRZ09325.1_T11
3459	EFV55889_T1	KRZ55501.1_T2	KRY48423.1_T3	KRX38934.1_T5	KRX72550.1_T6	KRX14127.1_T7	KRZ85123.1_T8	KRX59774.1_T9	KRY17132.1_T12	TP01963_T4	KRZ67160.1_T10	KRZ09332.1_T11
3460	EFV55891_T1	KRZ55536.1_T2	KRY48437.1_T3	KRX38940.1_T5	KRX72541.1_T6	KRX14148.1_T7	KRZ85109.1_T8	KRX59808.1_T9	KRY17180.1_T12	TP01959_T4	KRZ67173.1_T10	KRZ09340.1_T11
3461	EFV55898_T1	KRZ55515.1_T2	KRY48455.1_T3	KRX38926.1_T5	KRX72534.1_T6	KRX14146.1_T7	KRZ81980.1_T8	KRX59731.1_T9	KRY17139.1_T12	TP01954_T4	KRZ67175.1_T10	KRZ09352.1_T11
3462	EFV55902_T1	KRZ53284.1_T2	KRY48981.1_T3	KRX41489.1_T5	KRX74014.1_T6	KRX18584.1_T7	KRZ89536.1_T8	KRX55283.1_T9	KRY20208.1_T12	TP01506_T4	KRZ69128.1_T10	KRZ05728.1_T11
3463	EFV55904_T1	KRZ53286.1_T2	KRY48962.1_T3	KRX41499.1_T5	KRX74011.1_T6	KRX18637.1_T7	KRZ89534.1_T8	KRX55266.1_T9	KRY20162.1_T12	TP01504_T4	KRZ69147.1_T10	KRZ05733.1_T11
3464	EFV55906_T1	KRZ53285.1_T2	KRY48971.1_T3	KRX41481.1_T5	KRX74019.1_T6	KRX18639.1_T7	KRZ89563.1_T8	KRX55267.1_T9	KRY20203.1_T12	TP01502_T4	KRZ69122.1_T10	KRZ05750.1_T11
3465	EFV55907_T1	KRZ53291.1_T2	KRY48961.1_T3	KRX41507.1_T5	KRX74010.1_T6	KRX18619.1_T7	KRZ89576.1_T8	KRX55288.1_T9	KRY20236.1_T12	TP01501_T4	KRZ69136.1_T10	KRZ05756.1_T11
3466	EFV55908_T1	KRZ53302.1_T2	KRY48980.1_T3	KRX41506.1_T5	KRX74036.1_T6	KRX18607.1_T7	KRZ89549.1_T8	KRX55285.1_T9	KRY20176.1_T12	TP01500_T4	KRZ69154.1_T10	KRZ05738.1_T11
3467	EFV55909_T1	KRZ53317.1_T2	KRY48992.1_T3	KRX41513.1_T5	KRX74013.1_T6	KRX18630.1_T7	KRZ89533.1_T8	KRX55268.1_T9	KRY20243.1_T12	TP01499_T4	KRZ69149.1_T10	KRZ05752.1_T11
3468	EFV55911_T1	KRZ53310.1_T2	KRY48976.1_T3	KRX41497.1_T5	KRX74028.1_T6	KRX18643.1_T7	KRZ89553.1_T8	KRX55275.1_T9	KRY20229.1_T12	TP01496_T4	KRZ69129.1_T10	KRZ05744.1_T11
3469	EFV55914_T1	KRZ53307.1_T2	KRY48988.1_T3	KRX41494.1_T5	KRX74009.1_T6	KRX18613.1_T7	KRZ89567.1_T8	KRX55272.1_T9	KRY20217.1_T12	TP01494_T4	KRZ69126.1_T10	KRZ05748.1_T11
3470	EFV55920_T1	KRZ53304.1_T2	KRY48968.1_T3	KRX41484.1_T5	KRX74015.1_T6	KRX18616.1_T7	KRZ89547.1_T8	KRX55297.1_T9	KRY20160.1_T12	TP01486_T4	KRZ69130.1_T10	KRZ05754.1_T11
3471	EFV55926_T1	KRZ60336.1_T2	KRY60838.1_T3	KRX48454.1_T5	KRX84377.1_T6	KRX23240.1_T7	KRZ94922.1_T8	KRX66391.1_T9	KRY23520.1_T12	TP02067_T4	KRZ78347.1_T10	KRZ12438.1_T11
3472	EFV55929_T1	KRZ60330.1_T2	KRY60774.1_T3	KRX48448.1_T5	KRX84458.1_T6	KRX23223.1_T7	KRZ94974.1_T8	KRX66393.1_T9	KRY23417.1_T12	TP02066_T4	KRZ78322.1_T10	KRZ12488.1_T11
3473	EFV55931_T1	KRZ60307.1_T2	KRY60711.1_T3	KRX48400.1_T5	KRX84494.1_T6	KRX23132.1_T7	KRZ94931.1_T8	KRX66447.1_T9	KRY23512.1_T12	TP02064_T4	KRZ78280.1_T10	KRZ12476.1_T11
3474	EFV55934_T1	KRZ60358.1_T2	KRY60701.1_T3	KRX48457.1_T5	KRX84485.1_T6	KRX23149.1_T7	KRZ94912.1_T8	KRX66371.1_T9	KRY23559.1_T12	TP02061_T4	KRZ78275.1_T10	KRZ12474.1_T11
3475	EFV55936_T1	KRZ60364.1_T2	KRY60810.1_T3	KRX48437.1_T5	KRX84502.1_T6	KRX23143.1_T7	KRZ94946.1_T8	KRX66484.1_T9	KRY23374.1_T12	TP02059_T4	KRZ78364.1_T10	KRZ12475.1_T11
3476	EFV55937_T1	KRZ60353.1_T2	KRY60656.1_T3	KRX48421.1_T5	KRX84484.1_T6	KRX23176.1_T7	KRZ95010.1_T8	KRX66426.1_T9	KRY23462.1_T12	TP02058_T4	KRZ78283.1_T10	KRZ12435.1_T11
3477	EFV55986_T1	KRZ61043.1_T2	KRY60765.1_T3	KRX50113.1_T5	KRX84395.1_T6	KRX17616.1_T7	KRZ86693.1_T8	KRX66441.1_T9	KRY22595.1_T12	TP02015_T4	KRZ78335.1_T10	KRZ12511.1_T11
3478	EFV55987_T1	KRZ61096.1_T2	KRY60845.1_T3	KRX50125.1_T5	KRX84430.1_T6	KRX17582.1_T7	KRZ86711.1_T8	KRX66380.1_T9	KRY22525.1_T12	TP02014_T4	KRZ78315.1_T10	KRZ12521.1_T11
3479	EFV55988_T1	KRZ61076.1_T2	KRY60723.1_T3	KRX50108.1_T5	KRX84486.1_T6	KRX17574.1_T7	KRZ86678.1_T8	KRX66488.1_T9	KRY22608.1_T12	TP02013_T4	KRZ78266.1_T10	KRZ12516.1_T11
3480	EFV55989_T1	KRZ61014.1_T2	KRY60660.1_T3	KRX50148.1_T5	KRX84445.1_T6	KRX17626.1_T7	KRZ86688.1_T8	KRX66338.1_T9	KRY22618.1_T12	TP02012_T4	KRZ78311.1_T10	KRZ12467.1_T11
3481	EFV55991_T1	KRZ61053.1_T2	KRY60854.1_T3	KRX50062.1_T5	KRX84435.1_T6	KRX17607.1_T7	KRZ86713.1_T8	KRX66387.1_T9	KRY22613.1_T12	TP02008_T4	KRZ78383.1_T10	KRZ12489.1_T11
3482	EFV55992_T1	KRZ61074.1_T2	KRY60795.1_T3	KRX50073.1_T5	KRX84459.1_T6	KRX17636.1_T7	KRZ86681.1_T8	KRX66356.1_T9	KRY22531.1_T12	TP02007_T4	KRZ78241.1_T10	KRZ12518.1_T11
3483	EFV55995_T1	KRZ61068.1_T2	KRY60822.1_T3	KRX50055.1_T5	KRX84470.1_T6	KRX17599.1_T7	KRZ86704.1_T8	KRX66401.1_T9	KRY22670.1_T12	TP02005_T4	KRZ78251.1_T10	KRZ12495.1_T11
3484	EFV56011_T1	KRZ62830.1_T2	KRY57235.1_T3	KRX40200.1_T5	KRX82858.1_T6	KRX28071.1_T7	KRZ92970.1_T8	KRX63893.1_T9	KRY19143.1_T12	TP00800_T4	KRZ78199.1_T10	KRZ08479.1_T11
3485	EFV56015_T1	KRZ62898.1_T2	KRY57268.1_T3	KRX40199.1_T5	KRX82781.1_T6	KRX28180.1_T7	KRZ92977.1_T8	KRX63911.1_T9	KRY19136.1_T12	TP00804_T4	KRZ78153.1_T10	KRZ08452.1_T11
3486	EFV56016_T1	KRZ62848.1_T2	KRY57249.1_T3	KRX40214.1_T5	KRX82749.1_T6	KRX28081.1_T7	KRZ93034.1_T8	KRX63913.1_T9	KRY19141.1_T12	TP00805_T4	KRZ78200.1_T10	KRZ08483.1_T11
3487	EFV56044_T1	KRZ54353.1_T2	KRY46903.1_T3	KRX41877.1_T5	KRX77272.1_T6	KRX22205.1_T7	KRZ96904.1_T8	KRX53738.1_T9	KRY12731.1_T12	TP00706_T4	KRZ75856.1_T10	KRZ18477.1_T11
3488	EFV56045_T1	KRZ54334.1_T2	KRY46896.1_T3	KRX41891.1_T5	KRX77290.1_T6	KRX22195.1_T7	KRZ96880.1_T8	KRX53758.1_T9	KRY12732.1_T12	TP00707_T4	KRZ75792.1_T10	KRZ18361.1_T11
3489	EFV56046_T1	KRZ54346.1_T2	KRY46907.1_T3	KRX41878.1_T5	KRX77281.1_T6	KRX22169.1_T7	KRZ96957.1_T8	KRX53735.1_T9	KRY12746.1_T12	TP00708_T4	KRZ75850.1_T10	KRZ18402.1_T11
3490	EFV56049_T1	KRZ54343.1_T2	KRY46900.1_T3	KRX41885.1_T5	KRX77298.1_T6	KRX22249.1_T7	KRZ97044.1_T8	KRX53733.1_T9	KRY12758.1_T12	TP00710_T4	KRZ75847.1_T10	KRZ18284.1_T11
3491	EFV56051_T1	KRZ54356.1_T2	KRY46904.1_T3	KRX41881.1_T5	KRX77301.1_T6	KRX22190.1_T7	KRZ97092.1_T8	KRX53737.1_T9	KRY12737.1_T12	TP00715_T4	KRZ75864.1_T10	KRZ18372.1_T11
3492	EFV56052_T1	KRZ54355.1_T2	KRY46899.1_T3	KRX41880.1_T5	KRX77255.1_T6	KRX22243.1_T7	KRZ96881.1_T8	KRX53746.1_T9	KRY12750.1_T12	TP00718_T4	KRZ75833.1_T10	KRZ18465.1_T11
3493	EFV56056_T1	KRZ54341.1_T2	KRY48948.1_T3	KRX41865.1_T5	KRX74110.1_T6	KRX13544.1_T7	KRZ96925.1_T8	KRX52978.1_T9	KRY15725.1_T12	TP00721_T4	KRZ75830.1_T10	KRZ18395.1_T11
3494	EFV56057_T1	KRZ54327.1_T2	KRY48932.1_T3	KRX41862.1_T5	KRX74075.1_T6	KRX13536.1_T7	KRZ96900.1_T8	KRX52967.1_T9	KRY15679.1_T12	TP00722_T4	KRZ75835.1_T10	KRZ18455.1_T11
3495	EFV56058_T1	KRZ54325.1_T2	KRY48952.1_T3	KRX41863.1_T5	KRX74073.1_T6	KRX13546.1_T7	KRZ96978.1_T8	KRX52962.1_T9	KRY15706.1_T12	TP00723_T4	KRZ75827.1_T10	KRZ18509.1_T11
3496	EFV56060_T1	KRZ54354.1_T2	KRY48946.1_T3	KRX41873.1_T5	KRX74089.1_T6	KRX13547.1_T7	KRZ96921.1_T8	KRX52959.1_T9	KRY15704.1_T12	TP00725_T4	KRZ75815.1_T10	KRZ18311.1_T11
3497	EFV56061_T1	KRZ54324.1_T2	KRY48934.1_T3	KRX41870.1_T5	KRX74096.1_T6	KRX13537.1_T7	KRZ96902.1_T8	KRX52968.1_T9	KRY15675.1_T12	TP00726_T4	KRZ75785.1_T10	KRZ18384.1_T11
3498	EFV56062_T1	KRZ54358.1_T2	KRY48922.1_T3	KRX41868.1_T5	KRX74083.1_T6	KRX13545.1_T7	KRZ96952.1_T8	KRX52956.1_T9	KRY15711.1_T12	TP00727_T4	KRZ75806.1_T10	KRZ18510.1_T11
3499	EFV56064_T1	KRZ54329.1_T2	KRY48940.1_T3	KRX41884.1_T5	KRX74076.1_T6	KRX13535.1_T7	KRZ96971.1_T8	KRX52971.1_T9	KRY15713.1_T12	TP00733_T4	KRZ75858.1_T10	KRZ18303.1_T11
3500	EFV56074_T1	KRZ50724.1_T2	KRY48954.1_T3	KRX46728.1_T5	KRX82789.1_T6	KRX28136.1_T7	KRZ96982.1_T8	KRX57146.1_T9	KRY15696.1_T12	TP00744_T4	KRZ76569.1_T10	KRZ01898.1_T11
3501	EFV56078_T1	KRZ62887.1_T2	KRY47892.1_T3	KRX46742.1_T5	KRX82828.1_T6	KRX28253.1_T7	KRZ97053.1_T8	KRX57206.1_T9	KRY15689.1_T12	TP00751_T4	KRZ68555.1_T10	KRZ07927.1_T11
3502	EFV56083_T1	KRZ62856.1_T2	KRY47876.1_T3	KRX46723.1_T5	KRX82820.1_T6	KRX28032.1_T7	KRZ96972.1_T8	KRX57149.1_T9	KRY15712.1_T12	TP00756_T4	KRZ68559.1_T10	KRZ07944.1_T11
3503	EFV56084_T1	KRZ62842.1_T2	KRY47885.1_T3	KRX46724.1_T5	KRX82796.1_T6	KRX28051.1_T7	KRZ96933.1_T8	KRX57164.1_T9	KRY15694.1_T12	TP00757_T4	KRZ68551.1_T10	KRZ07966.1_T11
3504	EFV56086_T1	KRZ62901.1_T2	KRY47872.1_T3	KRX46729.1_T5	KRX82773.1_T6	KRX28250.1_T7	KRZ97051.1_T8	KRX57155.1_T9	KRY15726.1_T12	TP00758_T4	KRZ68562.1_T10	KRZ07961.1_T11
3505	EFV56088_T1	KRZ62903.1_T2	KRY57258.1_T3	KRX46735.1_T5	KRX82795.1_T6	KRX27987.1_T7	KRZ97095.1_T8	KRX57153.1_T9	KRY19088.1_T12	TP00760_T4	KRZ68533.1_T10	KRZ07962.1_T11
3506	EFV56097_T1	KRZ62850.1_T2	KRY57253.1_T3	KRX50313.1_T5	KRX82800.1_T6	KRX28038.1_T7	KRZ92964.1_T8	KRX63912.1_T9	KRY19124.1_T12	TP00770_T4	KRZ78093.1_T10	KRZ13712.1_T11
3507	EFV56098_T1	KRZ62826.1_T2	KRY57272.1_T3	KRX50330.1_T5	KRX82799.1_T6	KRX28083.1_T7	KRZ93047.1_T8	KRX63934.1_T9	KRY19094.1_T12	TP00771_T4	KRZ78076.1_T10	KRZ13673.1_T11
3508	EFV56099_T1	KRZ62822.1_T2	KRY57234.1_T3	KRX50385.1_T5	KRX82807.1_T6	KRX28367.1_T7	KRZ92998.1_T8	KRX63966.1_T9	KRY19084.1_T12	TP00772_T4	KRZ78175.1_T10	KRZ13735.1_T11
3509	EFV56104_T1	KRZ62884.1_T2	KRY57305.1_T3	KRX50367.1_T5	KRX82776.1_T6	KRX28067.1_T7	KRZ92985.1_T8	KRX63916.1_T9	KRY19137.1_T12	TP00775_T4	KRZ78116.1_T10	KRZ13656.1_T11
3510	EFV56105_T1	KRZ62800.1_T2	KRY57259.1_T3	KRX50323.1_T5	KRX82802.1_T6	KRX28085.1_T7	KRZ93010.1_T8	KRX63989.1_T9	KRY19099.1_T12	TP00776_T4	KRZ78190.1_T10	KRZ13698.1_T11
3511	EFV56106_T1	KRZ62877.1_T2	KRY57250.1_T3	KRX50317.1_T5	KRX82847.1_T6	KRX28220.1_T7	KRZ92974.1_T8	KRX63970.1_T9	KRY19105.1_T12	TP00777_T4	KRZ78100.1_T10	KRZ13676.1_T11
3512	EFV56107_T1	KRZ62891.1_T2	KRY57238.1_T3	KRX50341.1_T5	KRX82777.1_T6	KRX28317.1_T7	KRZ93002.1_T8	KRX63907.1_T9	KRY19151.1_T12	TP00778_T4	KRZ78087.1_T10	KRZ13739.1_T11
3513	EFV56108_T1	KRZ62844.1_T2	KRY57246.1_T3	KRX50389.1_T5	KRX82779.1_T6	KRX28332.1_T7	KRZ93029.1_T8	KRX63932.1_T9	KRY19131.1_T12	TP00781_T4	KRZ78114.1_T10	KRZ13693.1_T11
3514	EFV56120_T1	KRZ62812.1_T2	KRY57294.1_T3	KRX50337.1_T5	KRX82836.1_T6	KRX28089.1_T7	KRZ93046.1_T8	KRX63948.1_T9	KRY19081.1_T12	TP00794_T4	KRZ78168.1_T10	KRZ08448.1_T11
3515	EFV56127_T1	KRZ62905.1_T2	KRY57269.1_T3	KRX40195.1_T5	KRX82816.1_T6	KRX28209.1_T7	KRZ93038.1_T8	KRX63963.1_T9	KRY19146.1_T12	TP00799_T4	KRZ78181.1_T10	KRZ08482.1_T11
3516	EFV56134_T1	KRZ61671.1_T2	KRY57771.1_T3	KRX50037.1_T5	KRX79670.1_T6	KRX18179.1_T7	KRZ97079.1_T8	KRX67512.1_T9	KRY16038.1_T12	TP00637_T4	KRZ72102.1_T10	KRZ15336.1_T11
3518	EFV56138_T1	KRZ61622.1_T2	KRY57823.1_T3	KRX50003.1_T5	KRX79645.1_T6	KRX22203.1_T7	KRZ97016.1_T8	KRX67380.1_T9	KRY16045.1_T12	TP00644_T4	KRZ72094.1_T10	KRZ15321.1_T11
3519	EFV56150_T1	KRZ61604.1_T2	KRY57782.1_T3	KRX50025.1_T5	KRX79668.1_T6	KRX22217.1_T7	KRZ96973.1_T8	KRX67558.1_T9	KRY21729.1_T12	TP00653_T4	KRZ72092.1_T10	KRZ15329.1_T11
3520	EFV56152_T1	KRZ61684.1_T2	KRY57777.1_T3	KRX49987.1_T5	KRX79648.1_T6	KRX22177.1_T7	KRZ97049.1_T8	KRX67470.1_T9	KRY21778.1_T12	TP00655_T4	KRZ72076.1_T10	KRZ15323.1_T11
3522	EFV56167_T1	KRZ61658.1_T2	KRY51100.1_T3	KRX37761.1_T5	KRX70629.1_T6	KRX22166.1_T7	KRZ97087.1_T8	KRX67460.1_T9	KRY09453.1_T12	TP00669_T4	KRZ78107.1_T10	KRZ18457.1_T11
3523	EFV56174_T1	KRZ50307.1_T2	KRY51112.1_T3	KRX37759.1_T5	KRX69159.1_T6	KRX22260.1_T7	KRZ82301.1_T8	KRX67414.1_T9	KRY10151.1_T12	TP00677_T4	KRZ78080.1_T10	KRZ18299.1_T11
3524	EFV56176_T1	KRZ50297.1_T2	KRY51130.1_T3	KRX36458.1_T5	KRX69818.1_T6	KRX22241.1_T7	KRZ84042.1_T8	KRX67367.1_T9	KRY10153.1_T12	TP00679_T4	KRZ78112.1_T10	KRZ18438.1_T11
3525	EFV56186_T1	KRZ62839.1_T2	KRY55796.1_T3	KRX38799.1_T5	KRX76404.1_T6	KRX22228.1_T7	KRZ87535.1_T8	KRX67507.1_T9	KRY11934.1_T12	TP00684_T4	KRZ78166.1_T10	KRZ18329.1_T11
3526	EFV56187_T1	KRZ62894.1_T2	KRY55842.1_T3	KRX38797.1_T5	KRX76401.1_T6	KRX22254.1_T7	KRZ87509.1_T8	KRX67510.1_T9	KRY11932.1_T12	TP00686_T4	KRZ78073.1_T10	KRZ18278.1_T11
3527	EFV56193_T1	KRZ62803.1_T2	KRY55812.1_T3	KRX38807.1_T5	KRX76420.1_T6	KRX22162.1_T7	KRZ87501.1_T8	KRX67564.1_T9	KRY11907.1_T12	TP00692_T4	KRZ78197.1_T10	KRZ18485.1_T11
3528	EFV56196_T1	KRZ62836.1_T2	KRY55833.1_T3	KRX38791.1_T5	KRX76398.1_T6	KRX22252.1_T7	KRZ87551.1_T8	KRX67506.1_T9	KRY11908.1_T12	TP00695_T4	KRZ78171.1_T10	KRZ18495.1_T11
3529	EFV56197_T1	KRZ62809.1_T2	KRY55805.1_T3	KRX38810.1_T5	KRX76418.1_T6	KRX22218.1_T7	KRZ87569.1_T8	KRX67446.1_T9	KRY11937.1_T12	TP00696_T4	KRZ78186.1_T10	KRZ18503.1_T11
3530	EFV56198_T1	KRZ62909.1_T2	KRY55815.1_T3	KRX38803.1_T5	KRX76415.1_T6	KRX22274.1_T7	KRZ87567.1_T8	KRX67453.1_T9	KRY11918.1_T12	TP00697_T4	KRZ78170.1_T10	KRZ18389.1_T11
3531	EFV56202_T1	KRZ51621.1_T2	KRY55839.1_T3	KRX36398.1_T5	KRX76433.1_T6	KRX22278.1_T7	KRZ84473.1_T8	KRX67383.1_T9	KRY07519.1_T12	TP00699_T4	KRZ78158.1_T10	KRZ18294.1_T11
3532	EFV56205_T1	KRZ51619.1_T2	KRY55784.1_T3	KRX36400.1_T5	KRX76427.1_T6	KRX22268.1_T7	KRZ84460.1_T8	KRX67431.1_T9	KRY08632.1_T12	TP00702_T4	KRZ78121.1_T10	KRZ18314.1_T11
3533	EFV56206_T1	KRZ51614.1_T2	KRY55819.1_T3	KRX36410.1_T5	KRX76414.1_T6	KRX22202.1_T7	KRZ84455.1_T8	KRX67451.1_T9	KRY08630.1_T12	TP00704_T4	KRZ78151.1_T10	KRZ18436.1_T11
3534	EFV56207_T1	KRZ51633.1_T2	KRY55787.1_T3	KRX36408.1_T5	KRX76416.1_T6	KRX22280.1_T7	KRZ84467.1_T8	KRX67436.1_T9	KRY08637.1_T12	TP00705_T4	KRZ78160.1_T10	KRZ18394.1_T11
3535	EFV56211_T1	KRZ61654.1_T2	KRY57816.1_T3	KRX50027.1_T5	KRX79655.1_T6	KRX18220.1_T7	KRZ97071.1_T8	KRX67516.1_T9	KRY16013.1_T12	TP00630_T4	KRZ72077.1_T10	KRZ15345.1_T11
3536	EFV56222_T1	KRZ56924.1_T2	KRY51597.1_T3	KRX43738.1_T5	KRX73390.1_T6	KRX25378.1_T7	KRZ93007.1_T8	KRX67502.1_T9	KRY19320.1_T12	TP00583_T4	KRZ74572.1_T10	KRZ18353.1_T11
3537	EFV56228_T1	KRZ56944.1_T2	KRY51635.1_T3	KRX43728.1_T5	KRX73392.1_T6	KRX25295.1_T7	KRZ93028.1_T8	KRX67456.1_T9	KRY19283.1_T12	TP00586_T4	KRZ74582.1_T10	KRZ18290.1_T11
3538	EFV56229_T1	KRZ56942.1_T2	KRY51604.1_T3	KRX43709.1_T5	KRX73391.1_T6	KRX25450.1_T7	KRZ92968.1_T8	KRX67423.1_T9	KRY19252.1_T12	TP00588_T4	KRZ74558.1_T10	KRZ18279.1_T11
3539	EFV56231_T1	KRZ56929.1_T2	KRY51600.1_T3	KRX43717.1_T5	KRX73384.1_T6	KRX25489.1_T7	KRZ93005.1_T8	KRX67375.1_T9	KRY19318.1_T12	TP00589_T4	KRZ74583.1_T10	KRZ18428.1_T11
3540	EFV56235_T1	KRZ56943.1_T2	KRY51607.1_T3	KRX43743.1_T5	KRX73396.1_T6	KRX25351.1_T7	KRZ93026.1_T8	KRX67520.1_T9	KRY19247.1_T12	TP00591_T4	KRZ74596.1_T10	KRZ18513.1_T11
3541	EFV56237_T1	KRZ56949.1_T2	KRY51603.1_T3	KRX43712.1_T5	KRX73383.1_T6	KRX25346.1_T7	KRZ92963.1_T8	KRX67532.1_T9	KRY19244.1_T12	TP00592_T4	KRZ74574.1_T10	KRZ18298.1_T11
3542	EFV56239_T1	KRZ56909.1_T2	KRY51610.1_T3	KRX43707.1_T5	KRX73401.1_T6	KRX25297.1_T7	KRZ92991.1_T8	KRX67466.1_T9	KRY19291.1_T12	TP00593_T4	KRZ74577.1_T10	KRZ18293.1_T11
3543	EFV56240_T1	KRZ56911.1_T2	KRY51620.1_T3	KRX43737.1_T5	KRX73382.1_T6	KRX25304.1_T7	KRZ93041.1_T8	KRX67515.1_T9	KRY19301.1_T12	TP00594_T4	KRZ74584.1_T10	KRZ18445.1_T11
3544	EFV56245_T1	KRZ56921.1_T2	KRY47782.1_T3	KRX43736.1_T5	KRX73462.1_T6	KRX25372.1_T7	KRZ96905.1_T8	KRX67525.1_T9	KRY19325.1_T12	TP00600_T4	KRZ77381.1_T10	KRZ18476.1_T11
3545	EFV56247_T1	KRZ56914.1_T2	KRY47790.1_T3	KRX43704.1_T5	KRX73455.1_T6	KRX25435.1_T7	KRZ97022.1_T8	KRX67473.1_T9	KRY19268.1_T12	TP00601_T4	KRZ77304.1_T10	KRZ18439.1_T11
3546	EFV56269_T1	KRZ61638.1_T2	KRY57824.1_T3	KRX49978.1_T5	KRX79683.1_T6	KRX14697.1_T7	KRZ97085.1_T8	KRX67382.1_T9	KRY16033.1_T12	TP00619_T4	KRZ77385.1_T10	KRZ15320.1_T11
3547	EFV56286_T1	KRZ63011.1_T2	KRY60509.1_T3	KRX49947.1_T5	KRX76313.1_T6	KRX27182.1_T7	KRZ89884.1_T8	KRX62935.1_T9	KRY09390.1_T12	TP00538_T4	KRZ73116.1_T10	KRZ18430.1_T11
3548	EFV56287_T1	KRZ63025.1_T2	KRY60633.1_T3	KRX49912.1_T5	KRX76328.1_T6	KRX27254.1_T7	KRZ89857.1_T8	KRX62893.1_T9	KRY09387.1_T12	TP00539_T4	KRZ73080.1_T10	KRZ18338.1_T11
3549	EFV56289_T1	KRZ62974.1_T2	KRY60560.1_T3	KRX49924.1_T5	KRX76319.1_T6	KRX27299.1_T7	KRZ89890.1_T8	KRX62922.1_T9	KRY09393.1_T12	TP00542_T4	KRZ73099.1_T10	KRZ18292.1_T11
3550	EFV56290_T1	KRZ62921.1_T2	KRY60498.1_T3	KRX49937.1_T5	KRX76311.1_T6	KRX27174.1_T7	KRZ89875.1_T8	KRX62873.1_T9	KRY09396.1_T12	TP00543_T4	KRZ73125.1_T10	KRZ18393.1_T11
3551	EFV56292_T1	KRZ62951.1_T2	KRY60497.1_T3	KRX49896.1_T5	KRX76324.1_T6	KRX27099.1_T7	KRZ89914.1_T8	KRX62917.1_T9	KRY09386.1_T12	TP00544_T4	KRZ73121.1_T10	KRZ18332.1_T11
3552	EFV56293_T1	KRZ63028.1_T2	KRY60602.1_T3	KRX49955.1_T5	KRX76305.1_T6	KRX27096.1_T7	KRZ91506.1_T8	KRX62880.1_T9	KRY09395.1_T12	TP00545_T4	KRZ73110.1_T10	KRZ18317.1_T11
3553	EFV56296_T1	KRZ62997.1_T2	KRY60611.1_T3	KRX49958.1_T5	KRX76309.1_T6	KRX18264.1_T7	KRZ91584.1_T8	KRX62949.1_T9	KRY09397.1_T12	TP00550_T4	KRZ74586.1_T10	KRZ18492.1_T11
3554	EFV56316_T1	KRZ50927.1_T2	KRY60505.1_T3	KRX49917.1_T5	KRX69249.1_T6	KRX18288.1_T7	KRZ91579.1_T8	KRX68320.1_T9	KRY10617.1_T12	TP00567_T4	KRZ74567.1_T10	KRZ18274.1_T11
3555	EFV56317_T1	KRZ50916.1_T2	KRY60532.1_T3	KRX49915.1_T5	KRX69250.1_T6	KRX18302.1_T7	KRZ91523.1_T8	KRX68204.1_T9	KRY10616.1_T12	TP00568_T4	KRZ74557.1_T10	KRZ18368.1_T11
3556	EFV56318_T1	KRZ50932.1_T2	KRY60482.1_T3	KRX49885.1_T5	KRX69252.1_T6	KRX18254.1_T7	KRZ91511.1_T8	KRX68462.1_T9	KRY10625.1_T12	TP00569_T4	KRZ74569.1_T10	KRZ18498.1_T11
3557	EFV56320_T1	KRZ50928.1_T2	KRY60592.1_T3	KRX37221.1_T5	KRX70382.1_T6	KRX18295.1_T7	KRZ91581.1_T8	KRX68278.1_T9	KRY10610.1_T12	TP00571_T4	KRZ74587.1_T10	KRZ18380.1_T11
3558	EFV56321_T1	KRZ50921.1_T2	KRY60610.1_T3	KRX37219.1_T5	KRX70385.1_T6	KRX18275.1_T7	KRZ91547.1_T8	KRX68267.1_T9	KRY10615.1_T12	TP00572_T4	KRZ74571.1_T10	KRZ18286.1_T11
3559	EFV56324_T1	KRZ50911.1_T2	KRY60586.1_T3	KRX37217.1_T5	KRX70376.1_T6	KRX18293.1_T7	KRZ91558.1_T8	KRX68394.1_T9	KRY10627.1_T12	TP00574_T4	KRZ74601.1_T10	KRZ18309.1_T11
3560	EFV56325_T1	KRZ50933.1_T2	KRY60626.1_T3	KRX37223.1_T5	KRX69296.1_T6	KRX18300.1_T7	KRZ91546.1_T8	KRX68252.1_T9	KRY10619.1_T12	TP00575_T4	KRZ74554.1_T10	KRZ18271.1_T11
3561	EFV56332_T1	KRZ62962.1_T2	KRY60644.1_T3	KRX36442.1_T5	KRX72127.1_T6	KRX27210.1_T7	KRZ89921.1_T8	KRX62909.1_T9	KRY16397.1_T12	TP00512_T4	KRZ69863.1_T10	KRZ18414.1_T11
3562	EFV56333_T1	KRZ62969.1_T2	KRY60485.1_T3	KRX36445.1_T5	KRX72148.1_T6	KRX27317.1_T7	KRZ89882.1_T8	KRX62926.1_T9	KRY16420.1_T12	TP00515_T4	KRZ69877.1_T10	KRZ18277.1_T11
3563	EFV56335_T1	KRZ62979.1_T2	KRY60493.1_T3	KRX36440.1_T5	KRX72146.1_T6	KRX27258.1_T7	KRZ89929.1_T8	KRX62896.1_T9	KRY16409.1_T12	TP00516_T4	KRZ69850.1_T10	KRZ18420.1_T11
3564	EFV56337_T1	KRZ62985.1_T2	KRY60588.1_T3	KRX49886.1_T5	KRX72141.1_T6	KRX27331.1_T7	KRZ89905.1_T8	KRX62902.1_T9	KRY16410.1_T12	TP00517_T4	KRZ73118.1_T10	KRZ18453.1_T11
3565	EFV56338_T1	KRZ62982.1_T2	KRY60624.1_T3	KRX49953.1_T5	KRX72132.1_T6	KRX27259.1_T7	KRZ89911.1_T8	KRX62932.1_T9	KRY16396.1_T12	TP00518_T4	KRZ73107.1_T10	KRZ18463.1_T11
3566	EFV56340_T1	KRZ62996.1_T2	KRY60571.1_T3	KRX49880.1_T5	KRX72134.1_T6	KRX27261.1_T7	KRZ89927.1_T8	KRX62910.1_T9	KRY16435.1_T12	TP00521_T4	KRZ73072.1_T10	KRZ18489.1_T11
3567	EFV56341_T1	KRZ63021.1_T2	KRY60530.1_T3	KRX49954.1_T5	KRX72126.1_T6	KRX27256.1_T7	KRZ89861.1_T8	KRX62908.1_T9	KRY16393.1_T12	TP00520_T4	KRZ73113.1_T10	KRZ18379.1_T11
3568	EFV56346_T1	KRZ62976.1_T2	KRY60640.1_T3	KRX49951.1_T5	KRX72136.1_T6	KRX27290.1_T7	KRZ89915.1_T8	KRX62884.1_T9	KRY16419.1_T12	TP00526_T4	KRZ73083.1_T10	KRZ18289.1_T11
3569	EFV56354_T1	KRZ62992.1_T2	KRY60539.1_T3	KRX49892.1_T5	KRX76320.1_T6	KRX27139.1_T7	KRZ89895.1_T8	KRX62913.1_T9	KRY16424.1_T12	TP00528_T4	KRZ73127.1_T10	KRZ18263.1_T11
3570	EFV56355_T1	KRZ62961.1_T2	KRY60516.1_T3	KRX49906.1_T5	KRX76329.1_T6	KRX27222.1_T7	KRZ89864.1_T8	KRX62918.1_T9	KRY16418.1_T12	TP00531_T4	KRZ73117.1_T10	KRZ18344.1_T11
3571	EFV56361_T1	KRZ62972.1_T2	KRY60612.1_T3	KRX49933.1_T5	KRX76334.1_T6	KRX27100.1_T7	KRZ89924.1_T8	KRX62933.1_T9	KRY16426.1_T12	TP00534_T4	KRZ73129.1_T10	KRZ18460.1_T11
3572	EFV56368_T1	KRZ62994.1_T2	KRY58563.1_T3	KRX42806.1_T5	KRX70492.1_T6	KRX27303.1_T7	KRZ89922.1_T8	KRX62904.1_T9	KRY16425.1_T12	TP00509_T4	KRZ69857.1_T10	KRZ18342.1_T11
3573	EFV56372_T1	KRZ53160.1_T2	KRY51842.1_T3	KRX42814.1_T5	KRX71666.1_T6	KRX27167.1_T7	KRZ85452.1_T8	KRX55391.1_T9	KRY10111.1_T12	TP00487_T4	KRZ69881.1_T10	KRZ18291.1_T11
3574	EFV56377_T1	KRZ53149.1_T2	KRY51846.1_T3	KRX42798.1_T5	KRX71675.1_T6	KRX27225.1_T7	KRZ85456.1_T8	KRX55388.1_T9	KRY10104.1_T12	TP00497_T4	KRZ69880.1_T10	KRZ18377.1_T11
3575	EFV56378_T1	KRZ53158.1_T2	KRY51833.1_T3	KRX42812.1_T5	KRX71664.1_T6	KRX27088.1_T7	KRZ83644.1_T8	KRX55406.1_T9	KRY10109.1_T12	TP00498_T4	KRZ69864.1_T10	KRZ18410.1_T11
3576	EFV56381_T1	KRZ50592.1_T2	KRY51829.1_T3	KRX35622.1_T5	KRX72268.1_T6	KRX18273.1_T7	KRZ85469.1_T8	KRX55404.1_T9	KRY10837.1_T12	TP00483_T4	KRZ67209.1_T10	KRZ13706.1_T11
3577	EFV56393_T1	KRZ51894.1_T2	KRY58484.1_T3	KRX50332.1_T5	KRX73804.1_T6	KRX21160.1_T7	KRZ92784.1_T8	KRX62356.1_T9	KRY23038.1_T12	TP00043_T4	KRZ80347.1_T10	KRZ16563.1_T11
3578	EFV56401_T1	KRZ50599.1_T2	KRY51836.1_T3	KRX36121.1_T5	KRX72275.1_T6	KRX18277.1_T7	KRZ85448.1_T8	KRX52605.1_T9	KRY10838.1_T12	TP00477_T4	KRZ67223.1_T10	KRZ13728.1_T11
3579	EFV56402_T1	KRZ50593.1_T2	KRY51852.1_T3	KRX36128.1_T5	KRX72264.1_T6	KRX18253.1_T7	KRZ85466.1_T8	KRX52617.1_T9	KRY10830.1_T12	TP00478_T4	KRZ67230.1_T10	KRZ13738.1_T11
3580	EFV56404_T1	KRZ50601.1_T2	KRY51828.1_T3	KRX36118.1_T5	KRX72266.1_T6	KRX18290.1_T7	KRZ85464.1_T8	KRX52613.1_T9	KRY10842.1_T12	TP00479_T4	KRZ67227.1_T10	KRZ13667.1_T11
3581	EFV56408_T1	KRZ55158.1_T2	KRY58410.1_T3	KRX43017.1_T5	KRX73670.1_T6	KRX21089.1_T7	KRZ92789.1_T8	KRX66702.1_T9	KRY15797.1_T12	TP00470_T4	KRZ75828.1_T10	KRZ13679.1_T11
3582	EFV56411_T1	KRZ55149.1_T2	KRY58439.1_T3	KRX46702.1_T5	KRX72444.1_T6	KRX21063.1_T7	KRZ92823.1_T8	KRX62370.1_T9	KRY23183.1_T12	TP00036_T4	KRZ80240.1_T10	KRZ16567.1_T11
3583	EFV56412_T1	KRZ55170.1_T2	KRY58396.1_T3	KRX46727.1_T5	KRX72449.1_T6	KRX21138.1_T7	KRZ92719.1_T8	KRX62428.1_T9	KRY23080.1_T12	TP00035_T4	KRZ80262.1_T10	KRZ16613.1_T11
3584	EFV56413_T1	KRZ55172.1_T2	KRY58489.1_T3	KRX46739.1_T5	KRX72447.1_T6	KRX21094.1_T7	KRZ92737.1_T8	KRX62386.1_T9	KRY23128.1_T12	TP00034_T4	KRZ80238.1_T10	KRZ16633.1_T11
3585	EFV56414_T1	KRZ55175.1_T2	KRY58458.1_T3	KRX46733.1_T5	KRX72468.1_T6	KRX21161.1_T7	KRZ92740.1_T8	KRX62340.1_T9	KRY23093.1_T12	TP00032_T4	KRZ80283.1_T10	KRZ16631.1_T11
3586	EFV56420_T1	KRZ55165.1_T2	KRY58471.1_T3	KRX43018.1_T5	KRX72459.1_T6	KRX21115.1_T7	KRZ92714.1_T8	KRX62457.1_T9	KRY23196.1_T12	TP00026_T4	KRZ80162.1_T10	KRZ16618.1_T11
3587	EFV56428_T1	KRZ55163.1_T2	KRY58386.1_T3	KRX43023.1_T5	KRX73669.1_T6	KRX21164.1_T7	KRZ92757.1_T8	KRX66751.1_T9	KRY15800.1_T12	TP00459_T4	KRZ75855.1_T10	KRZ13720.1_T11
3588	EFV56430_T1	KRZ55148.1_T2	KRY58413.1_T3	KRX43028.1_T5	KRX73655.1_T6	KRX21067.1_T7	KRZ92793.1_T8	KRX66714.1_T9	KRY15816.1_T12	TP00462_T4	KRZ75863.1_T10	KRZ13645.1_T11
3589	EFV56431_T1	KRZ55156.1_T2	KRY58421.1_T3	KRX43016.1_T5	KRX73664.1_T6	KRX21107.1_T7	KRZ92797.1_T8	KRX66752.1_T9	KRY15786.1_T12	TP00463_T4	KRZ75860.1_T10	KRZ13730.1_T11
3590	EFV56432_T1	KRZ55169.1_T2	KRY58394.1_T3	KRX43011.1_T5	KRX73666.1_T6	KRX21124.1_T7	KRZ92769.1_T8	KRX66773.1_T9	KRY15826.1_T12	TP00464_T4	KRZ75788.1_T10	KRZ13726.1_T11
3591	EFV56433_T1	KRZ55176.1_T2	KRY58385.1_T3	KRX43014.1_T5	KRX73663.1_T6	KRX21065.1_T7	KRZ92785.1_T8	KRX66827.1_T9	KRY15812.1_T12	TP00466_T4	KRZ75809.1_T10	KRZ13731.1_T11
3592	EFV56449_T1	KRZ61704.1_T2	KRY58415.1_T3	KRX50296.1_T5	KRX76709.1_T6	KRX21162.1_T7	KRZ92781.1_T8	KRX52020.1_T9	KRY23126.1_T12	TP00085_T4	KRZ77534.1_T10	KRZ16606.1_T11
3593	EFV56450_T1	KRZ61775.1_T2	KRY58495.1_T3	KRX50349.1_T5	KRX76724.1_T6	KRX21141.1_T7	KRZ92751.1_T8	KRX52019.1_T9	KRY23017.1_T12	TP00082_T4	KRZ77478.1_T10	KRZ16604.1_T11
3594	EFV56456_T1	KRZ57773.1_T2	KRY58382.1_T3	KRX50355.1_T5	KRX76706.1_T6	KRX21096.1_T7	KRZ92786.1_T8	KRX62381.1_T9	KRY23030.1_T12	TP00078_T4	KRZ80339.1_T10	KRZ16591.1_T11
3595	EFV56457_T1	KRZ57767.1_T2	KRY58380.1_T3	KRX50359.1_T5	KRX76723.1_T6	KRX21097.1_T7	KRZ92778.1_T8	KRX62385.1_T9	KRY23142.1_T12	TP00077_T4	KRZ80316.1_T10	KRZ16590.1_T11
3596	EFV56460_T1	KRZ57755.1_T2	KRY58457.1_T3	KRX50315.1_T5	KRX76726.1_T6	KRX21125.1_T7	KRZ92817.1_T8	KRX62420.1_T9	KRY23061.1_T12	TP00076_T4	KRZ80337.1_T10	KRZ16664.1_T11
3597	EFV56466_T1	KRZ57743.1_T2	KRY58464.1_T3	KRX50340.1_T5	KRX76733.1_T6	KRX21105.1_T7	KRZ92739.1_T8	KRX62367.1_T9	KRY23065.1_T12	TP00068_T4	KRZ80323.1_T10	KRZ16605.1_T11
3598	EFV56467_T1	KRZ57747.1_T2	KRY58466.1_T3	KRX50336.1_T5	KRX76734.1_T6	KRX21155.1_T7	KRZ92776.1_T8	KRX62359.1_T9	KRY23016.1_T12	TP00067_T4	KRZ80252.1_T10	KRZ16652.1_T11
3599	EFV56470_T1	KRZ51893.1_T2	KRY58433.1_T3	KRX50375.1_T5	KRX73806.1_T6	KRX21098.1_T7	KRZ92773.1_T8	KRX62364.1_T9	KRY23055.1_T12	TP00064_T4	KRZ80355.1_T10	KRZ16658.1_T11
3600	EFV56472_T1	KRZ51901.1_T2	KRY58496.1_T3	KRX50288.1_T5	KRX73795.1_T6	KRX21144.1_T7	KRZ92788.1_T8	KRX62390.1_T9	KRY23048.1_T12	TP00058_T4	KRZ80249.1_T10	KRZ16643.1_T11
3601	EFV56474_T1	KRZ51897.1_T2	KRY58498.1_T3	KRX50333.1_T5	KRX73790.1_T6	KRX21111.1_T7	KRZ92761.1_T8	KRX62350.1_T9	KRY23058.1_T12	TP00055_T4	KRZ80207.1_T10	KRZ16670.1_T11
3602	EFV56476_T1	KRZ51907.1_T2	KRY58403.1_T3	KRX50309.1_T5	KRX73796.1_T6	KRX21106.1_T7	KRZ92771.1_T8	KRX62455.1_T9	KRY23165.1_T12	TP00052_T4	KRZ80176.1_T10	KRZ16673.1_T11
3604	EFV56516_T1	KRZ59010.1_T2	KRY56049.1_T3	KRX48143.1_T5	KRX74990.1_T6	KRX27981.1_T7	KRZ95892.1_T8	KRX67683.1_T9	KRY17353.1_T12	TP00146_T4	KRZ77480.1_T10	KRZ10855.1_T11
3605	EFV56519_T1	KRZ58994.1_T2	KRY56104.1_T3	KRX48174.1_T5	KRX74998.1_T6	KRX28229.1_T7	KRZ95956.1_T8	KRX67793.1_T9	KRY17348.1_T12	TP00145_T4	KRZ77471.1_T10	KRZ10894.1_T11
3606	EFV56520_T1	KRZ58993.1_T2	KRY56086.1_T3	KRX48167.1_T5	KRX75005.1_T6	KRX28232.1_T7	KRZ95908.1_T8	KRX67718.1_T9	KRY17336.1_T12	TP00144_T4	KRZ77547.1_T10	KRZ10920.1_T11
3608	EFV56524_T1	KRZ58999.1_T2	KRY56087.1_T3	KRX48170.1_T5	KRX74979.1_T6	KRX28074.1_T7	KRZ95772.1_T8	KRX67701.1_T9	KRY17365.1_T12	TP00142_T4	KRZ77447.1_T10	KRZ10857.1_T11
3609	EFV56525_T1	KRZ59008.1_T2	KRY56060.1_T3	KRX48131.1_T5	KRX75003.1_T6	KRX28027.1_T7	KRZ95776.1_T8	KRX67691.1_T9	KRY17321.1_T12	TP00141_T4	KRZ77535.1_T10	KRZ10921.1_T11
3610	EFV56526_T1	KRZ58998.1_T2	KRY56048.1_T3	KRX48126.1_T5	KRX74985.1_T6	KRX28366.1_T7	KRZ95942.1_T8	KRX67673.1_T9	KRY17351.1_T12	TP00140_T4	KRZ77520.1_T10	KRZ10906.1_T11
3613	EFV56571_T1	KRZ57108.1_T2	KRY47245.1_T3	KRX35794.1_T5	KRX70267.1_T6	KRX14445.1_T7	KRZ87544.1_T8	KRX56733.1_T9	KRY15332.1_T12	TP00106_T4	KRZ77408.1_T10	KRZ16614.1_T11
3614	EFV56572_T1	KRZ57138.1_T2	KRY47235.1_T3	KRX34454.1_T5	KRX72757.1_T6	KRX14473.1_T7	KRZ87511.1_T8	KRX56703.1_T9	KRY15342.1_T12	TP00105_T4	KRZ77461.1_T10	KRZ16608.1_T11
3615	EFV56573_T1	KRZ57144.1_T2	KRY47229.1_T3	KRX34458.1_T5	KRX72722.1_T6	KRX14437.1_T7	KRZ87528.1_T8	KRX56705.1_T9	KRY15346.1_T12	TP00103_T4	KRZ77469.1_T10	KRZ16690.1_T11
3616	EFV56574_T1	KRZ61691.1_T2	KRY47227.1_T3	KRX36282.1_T5	KRX70003.1_T6	KRX14453.1_T7	KRZ85527.1_T8	KRX54847.1_T9	KRY15305.1_T12	TP00101_T4	KRZ77437.1_T10	KRZ16584.1_T11
3617	EFV56575_T1	KRZ61689.1_T2	KRY47240.1_T3	KRX36284.1_T5	KRX70002.1_T6	KRX14454.1_T7	KRZ85544.1_T8	KRX54868.1_T9	KRY15306.1_T12	TP00100_T4	KRZ77460.1_T10	KRZ16615.1_T11
3618	EFV56587_T1	KRZ49368.1_T2	KRY48333.1_T3	KRX38237.1_T5	KRX76712.1_T6	KRX25987.1_T7	KRZ85515.1_T8	KRX54856.1_T9	KRY23172.1_T12	TP00092_T4	KRZ77466.1_T10	KRZ16628.1_T11
3619	EFV56594_T1	KRZ49361.1_T2	KRY48317.1_T3	KRX38242.1_T5	KRX76715.1_T6	KRX25978.1_T7	KRZ85512.1_T8	KRX54843.1_T9	KRY23141.1_T12	TP00088_T4	KRZ77454.1_T10	KRZ16616.1_T11
3621	EFV56605_T1	KRZ53820.1_T2	KRY61341.1_T3	KRX43251.1_T5	KRX83167.1_T6	KRX25933.1_T7	KRZ95924.1_T8	KRX67816.1_T9	KRY20288.1_T12	TP00184_T4	KRZ80813.1_T10	KRZ12033.1_T11
3622	EFV56606_T1	KRZ53799.1_T2	KRY61512.1_T3	KRX43241.1_T5	KRX83103.1_T6	KRX26054.1_T7	KRZ82883.1_T8	KRX67794.1_T9	KRY20289.1_T12	TP00183_T4	KRZ81052.1_T10	KRZ12007.1_T11
3623	EFV56610_T1	KRZ53829.1_T2	KRY61351.1_T3	KRX43217.1_T5	KRX69447.1_T6	KRX28208.1_T7	KRZ82880.1_T8	KRX67788.1_T9	KRY20335.1_T12	TP00182_T4	KRZ80720.1_T10	KRZ12012.1_T11
3624	EFV56613_T1	KRZ53832.1_T2	KRY61331.1_T3	KRX43225.1_T5	KRX83236.1_T6	KRX25979.1_T7	KRZ95954.1_T8	KRX67800.1_T9	KRY20283.1_T12	TP00187_T4	KRZ80918.1_T10	KRZ12056.1_T11
3625	EFV56621_T1	KRZ53794.1_T2	KRY61414.1_T3	KRX43214.1_T5	KRX83137.1_T6	KRX26009.1_T7	KRZ95854.1_T8	KRX67598.1_T9	KRY20257.1_T12	TP00190_T4	KRZ81042.1_T10	KRZ11984.1_T11
3626	EFV56624_T1	KRZ53814.1_T2	KRY61436.1_T3	KRX43219.1_T5	KRX83203.1_T6	KRX26111.1_T7	KRZ95844.1_T8	KRX67733.1_T9	KRY20300.1_T12	TP00188_T4	KRZ80705.1_T10	KRZ11974.1_T11
3627	EFV56636_T1	KRZ53800.1_T2	KRY61566.1_T3	KRX43245.1_T5	KRX83146.1_T6	KRX25965.1_T7	KRZ95818.1_T8	KRX67737.1_T9	KRY20281.1_T12	TP00202_T4	KRZ80680.1_T10	KRZ11973.1_T11
3628	EFV56641_T1	KRZ53806.1_T2	KRY61521.1_T3	KRX43243.1_T5	KRX83180.1_T6	KRX26094.1_T7	KRZ95878.1_T8	KRX67839.1_T9	KRY20328.1_T12	TP00196_T4	KRZ80807.1_T10	KRZ12042.1_T11
3629	EFV56654_T1	KRZ63475.1_T2	KRY61478.1_T3	KRX49227.1_T5	KRX83164.1_T6	KRX26146.1_T7	KRZ98187.1_T8	KRX68689.1_T9	KRY22515.1_T12	TP00216_T4	KRZ80839.1_T10	KRZ11990.1_T11
3630	EFV56655_T1	KRZ63346.1_T2	KRY61575.1_T3	KRX49201.1_T5	KRX83127.1_T6	KRX25937.1_T7	KRZ98211.1_T8	KRX68990.1_T9	KRY22487.1_T12	TP00215_T4	KRZ80911.1_T10	KRZ12005.1_T11
3631	EFV56662_T1	KRZ63442.1_T2	KRY61364.1_T3	KRX49174.1_T5	KRX83206.1_T6	KRX25973.1_T7	KRZ98092.1_T8	KRX68662.1_T9	KRY22371.1_T12	TP00211_T4	KRZ80990.1_T10	KRZ12014.1_T11
3632	EFV56664_T1	KRZ48118.1_T2	KRY61597.1_T3	KRX49219.1_T5	KRX83155.1_T6	KRX25977.1_T7	KRZ97899.1_T8	KRX68976.1_T9	KRY22472.1_T12	TP00210_T4	KRZ80937.1_T10	KRZ11980.1_T11
3634	EFV56670_T1	KRZ63481.1_T2	KRY61561.1_T3	KRX49160.1_T5	KRX83196.1_T6	KRX26011.1_T7	KRZ97995.1_T8	KRX68764.1_T9	KRY22488.1_T12	TP00222_T4	KRZ80746.1_T10	KRZ12055.1_T11
3635	EFV56671_T1	KRZ63354.1_T2	KRY61409.1_T3	KRX49225.1_T5	KRX83224.1_T6	KRX25930.1_T7	KRZ97978.1_T8	KRX68561.1_T9	KRY22429.1_T12	TP00221_T4	KRZ80739.1_T10	KRZ12000.1_T11
3636	EFV56674_T1	KRZ63498.1_T2	KRY61360.1_T3	KRX49234.1_T5	KRX83226.1_T6	KRX26089.1_T7	KRZ97906.1_T8	KRX68735.1_T9	KRY22485.1_T12	TP00262_T4	KRZ75555.1_T10	KRZ16323.1_T11
3637	EFV56683_T1	KRZ63368.1_T2	KRY61540.1_T3	KRX49182.1_T5	KRX83160.1_T6	KRX26029.1_T7	KRZ97942.1_T8	KRX68590.1_T9	KRY22486.1_T12	TP00254_T4	KRZ75523.1_T10	KRZ16348.1_T11
3638	EFV56684_T1	KRZ63345.1_T2	KRY61559.1_T3	KRX49202.1_T5	KRX83188.1_T6	KRX25982.1_T7	KRZ97939.1_T8	KRX69023.1_T9	KRY22419.1_T12	TP00252_T4	KRZ75554.1_T10	KRZ16381.1_T11
3639	EFV56685_T1	KRZ63483.1_T2	KRY61507.1_T3	KRX49221.1_T5	KRX83128.1_T6	KRX26124.1_T7	KRZ98164.1_T8	KRX68775.1_T9	KRY22440.1_T12	TP00251_T4	KRZ75506.1_T10	KRZ16366.1_T11
3640	EFV56688_T1	KRZ63424.1_T2	KRY61443.1_T3	KRX49210.1_T5	KRX83235.1_T6	KRX26099.1_T7	KRZ97983.1_T8	KRX68587.1_T9	KRY22506.1_T12	TP00245_T4	KRZ75487.1_T10	KRZ12001.1_T11
3641	EFV56689_T1	KRZ63448.1_T2	KRY61467.1_T3	KRX49232.1_T5	KRX83186.1_T6	KRX26046.1_T7	KRZ97863.1_T8	KRX68579.1_T9	KRY22446.1_T12	TP00244_T4	KRZ75496.1_T10	KRZ12054.1_T11
3642	EFV56693_T1	KRZ63430.1_T2	KRY61358.1_T3	KRX49161.1_T5	KRX83111.1_T6	KRX26148.1_T7	KRZ98161.1_T8	KRX69000.1_T9	KRY22509.1_T12	TP00240_T4	KRZ75522.1_T10	KRZ12017.1_T11
3643	EFV56695_T1	KRZ63308.1_T2	KRY61314.1_T3	KRX49230.1_T5	KRX83238.1_T6	KRX25966.1_T7	KRZ98018.1_T8	KRX68999.1_T9	KRY22451.1_T12	TP00238_T4	KRZ80847.1_T10	KRZ11972.1_T11
3644	EFV56698_T1	KRZ63398.1_T2	KRY61366.1_T3	KRX49179.1_T5	KRX83194.1_T6	KRX26063.1_T7	KRZ98061.1_T8	KRX68589.1_T9	KRY22463.1_T12	TP00237_T4	KRZ80898.1_T10	KRZ12020.1_T11
3645	EFV56700_T1	KRZ63490.1_T2	KRY61532.1_T3	KRX49175.1_T5	KRX83129.1_T6	KRX25925.1_T7	KRZ97898.1_T8	KRX68649.1_T9	KRY22460.1_T12	TP00235_T4	KRZ81029.1_T10	KRZ12043.1_T11
3646	EFV56702_T1	KRZ63342.1_T2	KRY61397.1_T3	KRX49164.1_T5	KRX83223.1_T6	KRX26050.1_T7	KRZ98081.1_T8	KRX68708.1_T9	KRY22471.1_T12	TP00232_T4	KRZ80704.1_T10	KRZ12028.1_T11
3647	EFV56704_T1	KRZ63371.1_T2	KRY61441.1_T3	KRX49245.1_T5	KRX83140.1_T6	KRX25974.1_T7	KRZ98180.1_T8	KRX68614.1_T9	KRY22517.1_T12	TP00230_T4	KRZ80762.1_T10	KRZ11986.1_T11
3648	EFV56721_T1	KRZ63339.1_T2	KRY61424.1_T3	KRX36606.1_T5	KRX72282.1_T6	KRX26020.1_T7	KRZ98066.1_T8	KRX68980.1_T9	KRY22351.1_T12	TP00302_T4	KRZ72744.1_T10	KRZ16273.1_T11
3649	EFV56725_T1	KRZ63369.1_T2	KRY61586.1_T3	KRX36599.1_T5	KRX72284.1_T6	KRX25959.1_T7	KRZ97955.1_T8	KRX68838.1_T9	KRY22469.1_T12	TP00301_T4	KRZ72738.1_T10	KRZ16310.1_T11
3650	EFV56726_T1	KRZ63400.1_T2	KRY61546.1_T3	KRX36613.1_T5	KRX72283.1_T6	KRX25936.1_T7	KRZ98015.1_T8	KRX68626.1_T9	KRY22510.1_T12	TP00300_T4	KRZ72686.1_T10	KRZ16326.1_T11
3651	EFV56731_T1	KRZ63321.1_T2	KRY61536.1_T3	KRX44233.1_T5	KRX72301.1_T6	KRX25991.1_T7	KRZ97861.1_T8	KRX68940.1_T9	KRY22381.1_T12	TP00292_T4	KRZ75570.1_T10	KRZ16364.1_T11
3652	EFV56732_T1	KRZ63312.1_T2	KRY61515.1_T3	KRX44226.1_T5	KRX72306.1_T6	KRX25921.1_T7	KRZ98198.1_T8	KRX68936.1_T9	KRY22473.1_T12	TP00291_T4	KRZ75502.1_T10	KRZ16346.1_T11
3654	EFV56740_T1	KRZ63425.1_T2	KRY61393.1_T3	KRX44214.1_T5	KRX74510.1_T6	KRX25985.1_T7	KRZ98173.1_T8	KRX68632.1_T9	KRY22450.1_T12	TP00286_T4	KRZ75563.1_T10	KRZ16309.1_T11
3655	EFV56741_T1	KRZ63300.1_T2	KRY61412.1_T3	KRX44221.1_T5	KRX74513.1_T6	KRX25926.1_T7	KRZ97989.1_T8	KRX68921.1_T9	KRY22368.1_T12	TP00285_T4	KRZ75528.1_T10	KRZ16393.1_T11
3656	EFV56743_T1	KRZ63506.1_T2	KRY61399.1_T3	KRX44219.1_T5	KRX74484.1_T6	KRX26090.1_T7	KRZ98125.1_T8	KRX68814.1_T9	KRY22492.1_T12	TP00284_T4	KRZ75492.1_T10	KRZ16332.1_T11
3657	EFV56744_T1	KRZ63394.1_T2	KRY61361.1_T3	KRX44242.1_T5	KRX74501.1_T6	KRX26113.1_T7	KRZ98051.1_T8	KRX68780.1_T9	KRY22421.1_T12	TP00283_T4	KRZ75565.1_T10	KRZ16278.1_T11
3658	EFV56746_T1	KRZ63390.1_T2	KRY61348.1_T3	KRX44239.1_T5	KRX74494.1_T6	KRX26066.1_T7	KRZ97893.1_T8	KRX68723.1_T9	KRY22459.1_T12	TP00281_T4	KRZ75500.1_T10	KRZ16268.1_T11
3659	EFV56757_T1	KRZ63332.1_T2	KRY61344.1_T3	KRX44224.1_T5	KRX74487.1_T6	KRX26093.1_T7	KRZ98023.1_T8	KRX69026.1_T9	KRY22512.1_T12	TP00272_T4	KRZ75504.1_T10	KRZ16314.1_T11
3660	EFV56765_T1	KRZ63459.1_T2	KRY61594.1_T3	KRX49185.1_T5	KRX83221.1_T6	KRX26139.1_T7	KRZ98016.1_T8	KRX68756.1_T9	KRY22404.1_T12	TP00268_T4	KRZ75520.1_T10	KRZ16294.1_T11
3661	EFV56777_T1	KRZ49979.1_T2	KRY61322.1_T3	KRX36945.1_T5	KRX72309.1_T6	KRX25976.1_T7	KRZ98131.1_T8	KRX60779.1_T9	KRY22443.1_T12	TP00307_T4	KRZ72725.1_T10	KRZ16302.1_T11
3662	EFV56779_T1	KRZ49975.1_T2	KRY61303.1_T3	KRX36938.1_T5	KRX72303.1_T6	KRX26119.1_T7	KRZ97905.1_T8	KRX60776.1_T9	KRY22364.1_T12	TP00306_T4	KRZ72707.1_T10	KRZ16352.1_T11
3663	EFV56780_T1	KRZ49978.1_T2	KRY61432.1_T3	KRX36943.1_T5	KRX72290.1_T6	KRX26043.1_T7	KRZ98065.1_T8	KRX60723.1_T9	KRY22416.1_T12	TP00305_T4	KRZ72683.1_T10	KRZ16341.1_T11
3665	EFV56795_T1	KRZ59959.1_T2	KRY59906.1_T3	KRX47051.1_T5	KRX73132.1_T6	KRX27608.1_T7	KRZ95066.1_T8	KRX68903.1_T9	KRY18593.1_T12	TP00398_T4	KRZ77782.1_T10	KRZ17328.1_T11
3666	EFV56797_T1	KRZ59981.1_T2	KRY59819.1_T3	KRX47061.1_T5	KRX73878.1_T6	KRX27415.1_T7	KRZ95181.1_T8	KRX68915.1_T9	KRY18558.1_T12	TP00394_T4	KRZ77791.1_T10	KRZ17268.1_T11
3667	EFV56798_T1	KRZ59965.1_T2	KRY59924.1_T3	KRX47065.1_T5	KRX73857.1_T6	KRX27362.1_T7	KRZ95118.1_T8	KRX68971.1_T9	KRY18566.1_T12	TP00393_T4	KRZ77696.1_T10	KRZ17338.1_T11
3668	EFV56800_T1	KRZ59911.1_T2	KRY59921.1_T3	KRX47073.1_T5	KRX73871.1_T6	KRX27405.1_T7	KRZ95171.1_T8	KRX69025.1_T9	KRY18604.1_T12	TP00392_T4	KRZ77713.1_T10	KRZ17360.1_T11
3669	EFV56803_T1	KRZ59961.1_T2	KRY59870.1_T3	KRX47089.1_T5	KRX73876.1_T6	KRX27532.1_T7	KRZ95116.1_T8	KRX68605.1_T9	KRY18565.1_T12	TP00390_T4	KRZ77703.1_T10	KRZ17432.1_T11
3670	EFV56804_T1	KRZ59908.1_T2	KRY59916.1_T3	KRX47056.1_T5	KRX73873.1_T6	KRX27459.1_T7	KRZ95182.1_T8	KRX68702.1_T9	KRY18559.1_T12	TP00389_T4	KRZ77652.1_T10	KRZ17436.1_T11
3671	EFV56805_T1	KRZ59909.1_T2	KRY59872.1_T3	KRX47048.1_T5	KRX73849.1_T6	KRX27473.1_T7	KRZ95061.1_T8	KRX69001.1_T9	KRY18568.1_T12	TP00388_T4	KRZ77760.1_T10	KRZ17358.1_T11
3672	EFV56806_T1	KRZ59914.1_T2	KRY59884.1_T3	KRX47066.1_T5	KRX73858.1_T6	KRX27377.1_T7	KRZ95136.1_T8	KRX68749.1_T9	KRY18526.1_T12	TP00387_T4	KRZ77705.1_T10	KRZ17238.1_T11
3673	EFV56812_T1	KRZ59916.1_T2	KRY59939.1_T3	KRX47083.1_T5	KRX73868.1_T6	KRX27382.1_T7	KRZ95166.1_T8	KRX68598.1_T9	KRY18550.1_T12	TP00381_T4	KRZ69449.1_T10	KRZ17288.1_T11
3674	EFV56813_T1	KRZ59929.1_T2	KRY59793.1_T3	KRX47043.1_T5	KRX73877.1_T6	KRX27567.1_T7	KRZ95052.1_T8	KRX68725.1_T9	KRY18581.1_T12	TP00380_T4	KRZ69473.1_T10	KRZ17324.1_T11
3675	EFV56817_T1	KRZ59944.1_T2	KRY59886.1_T3	KRX47029.1_T5	KRX73853.1_T6	KRX27575.1_T7	KRZ95104.1_T8	KRX68818.1_T9	KRY18522.1_T12	TP00373_T4	KRZ69459.1_T10	KRZ17264.1_T11
3676	EFV56818_T1	KRZ59979.1_T2	KRY59894.1_T3	KRX47031.1_T5	KRX73880.1_T6	KRX27422.1_T7	KRZ95089.1_T8	KRX68952.1_T9	KRY18588.1_T12	TP00372_T4	KRZ69463.1_T10	KRZ17406.1_T11
3677	EFV56819_T1	KRZ59931.1_T2	KRY59824.1_T3	KRX47062.1_T5	KRX73851.1_T6	KRX27469.1_T7	KRZ95180.1_T8	KRX68891.1_T9	KRY18582.1_T12	TP00371_T4	KRZ69440.1_T10	KRZ17437.1_T11
3678	EFV56823_T1	KRZ63351.1_T2	KRY61423.1_T3	KRX44318.1_T5	KRX75512.1_T6	KRX27433.1_T7	KRZ98118.1_T8	KRX55516.1_T9	KRY18564.1_T12	TP00367_T4	KRZ69475.1_T10	KRZ17331.1_T11
3679	EFV56824_T1	KRZ63453.1_T2	KRY61391.1_T3	KRX44329.1_T5	KRX75499.1_T6	KRX27511.1_T7	KRZ97870.1_T8	KRX55518.1_T9	KRY18548.1_T12	TP00368_T4	KRZ69457.1_T10	KRZ17311.1_T11
3680	EFV56826_T1	KRZ63331.1_T2	KRY61475.1_T3	KRX44330.1_T5	KRX75476.1_T6	KRX27426.1_T7	KRZ98069.1_T8	KRX55515.1_T9	KRY18576.1_T12	TP00366_T4	KRZ69444.1_T10	KRZ17413.1_T11
3681	EFV56829_T1	KRZ63455.1_T2	KRY61369.1_T3	KRX44328.1_T5	KRX75506.1_T6	KRX27376.1_T7	KRZ98043.1_T8	KRX55533.1_T9	KRY09111.1_T12	TP00362_T4	KRZ69442.1_T10	KRZ17394.1_T11
3682	EFV56833_T1	KRZ63488.1_T2	KRY61445.1_T3	KRX44297.1_T5	KRX75482.1_T6	KRX27571.1_T7	KRZ97968.1_T8	KRX55512.1_T9	KRY09118.1_T12	TP00357_T4	KRZ69454.1_T10	KRZ17334.1_T11
3683	EFV56834_T1	KRZ63380.1_T2	KRY61563.1_T3	KRX44314.1_T5	KRX75503.1_T6	KRX27609.1_T7	KRZ98079.1_T8	KRX55517.1_T9	KRY09112.1_T12	TP00356_T4	KRZ69438.1_T10	KRZ17318.1_T11
3684	EFV56841_T1	KRZ63366.1_T2	KRY61390.1_T3	KRX44326.1_T5	KRX75496.1_T6	KRX27585.1_T7	KRZ97921.1_T8	KRX55523.1_T9	KRY19927.1_T12	TP00350_T4	KRZ75538.1_T10	KRZ16262.1_T11
3685	EFV56842_T1	KRZ63378.1_T2	KRY61488.1_T3	KRX49537.1_T5	KRX80973.1_T6	KRX27438.1_T7	KRZ97975.1_T8	KRX60780.1_T9	KRY19964.1_T12	TP00349_T4	KRZ75507.1_T10	KRZ16373.1_T11
3686	EFV56844_T1	KRZ63492.1_T2	KRY61327.1_T3	KRX49560.1_T5	KRX80904.1_T6	KRX27446.1_T7	KRZ98158.1_T8	KRX60754.1_T9	KRY19936.1_T12	TP00347_T4	KRZ75486.1_T10	KRZ16304.1_T11
3687	EFV56845_T1	KRZ63309.1_T2	KRY61431.1_T3	KRX49516.1_T5	KRX80982.1_T6	KRX27392.1_T7	KRZ98103.1_T8	KRX60742.1_T9	KRY19959.1_T12	TP00346_T4	KRZ75557.1_T10	KRZ16324.1_T11
3688	EFV56846_T1	KRZ63335.1_T2	KRY61320.1_T3	KRX49503.1_T5	KRX80955.1_T6	KRX27509.1_T7	KRZ98111.1_T8	KRX60795.1_T9	KRY19914.1_T12	TP00344_T4	KRZ75530.1_T10	KRZ16320.1_T11
3689	EFV56847_T1	KRZ63372.1_T2	KRY61580.1_T3	KRX49521.1_T5	KRX80903.1_T6	KRX27339.1_T7	KRZ97901.1_T8	KRX60783.1_T9	KRY19953.1_T12	TP00342_T4	KRZ75552.1_T10	KRZ16340.1_T11
3690	EFV56856_T1	KRZ63310.1_T2	KRY61555.1_T3	KRX49573.1_T5	KRX80939.1_T6	KRX27497.1_T7	KRZ97963.1_T8	KRX60760.1_T9	KRY19962.1_T12	TP00333_T4	KRZ73056.1_T10	KRZ16265.1_T11
3691	EFV56858_T1	KRZ63504.1_T2	KRY61383.1_T3	KRX49508.1_T5	KRX80970.1_T6	KRX27476.1_T7	KRZ97946.1_T8	KRX60732.1_T9	KRY19941.1_T12	TP00330_T4	KRZ73059.1_T10	KRZ16263.1_T11
3692	EFV56859_T1	KRZ63376.1_T2	KRY61548.1_T3	KRX49539.1_T5	KRX80968.1_T6	KRX27559.1_T7	KRZ97869.1_T8	KRX60724.1_T9	KRY19950.1_T12	TP00329_T4	KRZ73017.1_T10	KRZ16267.1_T11
3693	EFV56860_T1	KRZ63415.1_T2	KRY61376.1_T3	KRX49576.1_T5	KRX80905.1_T6	KRX27475.1_T7	KRZ98129.1_T8	KRX60772.1_T9	KRY19893.1_T12	TP00328_T4	KRZ73048.1_T10	KRZ16396.1_T11
3694	EFV56863_T1	KRZ63323.1_T2	KRY61564.1_T3	KRX49523.1_T5	KRX80967.1_T6	KRX27369.1_T7	KRZ97887.1_T8	KRX60751.1_T9	KRY19902.1_T12	TP00327_T4	KRZ73054.1_T10	KRZ16291.1_T11
3695	EFV56867_T1	KRZ63367.1_T2	KRY61310.1_T3	KRX49527.1_T5	KRX80886.1_T6	KRX27424.1_T7	KRZ97877.1_T8	KRX60777.1_T9	KRY19920.1_T12	TP00324_T4	KRZ73014.1_T10	KRZ16313.1_T11
3696	EFV56868_T1	KRZ63381.1_T2	KRY61489.1_T3	KRX49519.1_T5	KRX80922.1_T6	KRX27443.1_T7	KRZ98209.1_T8	KRX60753.1_T9	KRY19881.1_T12	TP00322_T4	KRZ73033.1_T10	KRZ16336.1_T11
3697	EFV56869_T1	KRZ63349.1_T2	KRY61545.1_T3	KRX49548.1_T5	KRX80891.1_T6	KRX27388.1_T7	KRZ97933.1_T8	KRX60731.1_T9	KRY19935.1_T12	TP00321_T4	KRZ73051.1_T10	KRZ16316.1_T11
3698	EFV56870_T1	KRZ63403.1_T2	KRY61471.1_T3	KRX49571.1_T5	KRX80960.1_T6	KRX27472.1_T7	KRZ98174.1_T8	KRX60750.1_T9	KRY19944.1_T12	TP00318_T4	KRZ72750.1_T10	KRZ16379.1_T11
3699	EFV56871_T1	KRZ63452.1_T2	KRY61319.1_T3	KRX49515.1_T5	KRX80915.1_T6	KRX27573.1_T7	KRZ98013.1_T8	KRX60785.1_T9	KRY19884.1_T12	TP00319_T4	KRZ72680.1_T10	KRZ16375.1_T11
3700	EFV56876_T1	KRZ63422.1_T2	KRY61473.1_T3	KRX49501.1_T5	KRX80965.1_T6	KRX27372.1_T7	KRZ98037.1_T8	KRX60807.1_T9	KRY19954.1_T12	TP00315_T4	KRZ72731.1_T10	KRZ16395.1_T11
3701	EFV56877_T1	KRZ63496.1_T2	KRY61438.1_T3	KRX49554.1_T5	KRX80935.1_T6	KRX27514.1_T7	KRZ97894.1_T8	KRX60762.1_T9	KRY19955.1_T12	TP00314_T4	KRZ72695.1_T10	KRZ16288.1_T11
3702	EFV56878_T1	KRZ63460.1_T2	KRY61395.1_T3	KRX49568.1_T5	KRX80957.1_T6	KRX27338.1_T7	KRZ97881.1_T8	KRX60722.1_T9	KRY19885.1_T12	TP00313_T4	KRZ72678.1_T10	KRZ16283.1_T11
3703	EFV56885_T1	KRZ51125.1_T2	KRY46267.1_T3	KRX39383.1_T5	KRX84031.1_T6	KRX27548.1_T7	KRZ83023.1_T8	KRX68751.1_T9	KRY18585.1_T12	TP00424_T4	KRZ77641.1_T10	KRZ17305.1_T11
3704	EFV56886_T1	KRZ51132.1_T2	KRY46261.1_T3	KRX39377.1_T5	KRX83911.1_T6	KRX27481.1_T7	KRZ83016.1_T8	KRX68822.1_T9	KRY18529.1_T12	TP00422_T4	KRZ77647.1_T10	KRZ17302.1_T11
3705	EFV56888_T1	KRZ51115.1_T2	KRY46271.1_T3	KRX39363.1_T5	KRX84020.1_T6	KRX27462.1_T7	KRZ83027.1_T8	KRX69035.1_T9	KRY18537.1_T12	TP00420_T4	KRZ77728.1_T10	KRZ17286.1_T11
3706	EFV56889_T1	KRZ51127.1_T2	KRY46265.1_T3	KRX39379.1_T5	KRX83971.1_T6	KRX27366.1_T7	KRZ83020.1_T8	KRX68724.1_T9	KRY18584.1_T12	TP00419_T4	KRZ77706.1_T10	KRZ17252.1_T11
3707	EFV56891_T1	KRZ59976.1_T2	KRY59810.1_T3	KRX47097.1_T5	KRX73118.1_T6	KRX27363.1_T7	KRZ95168.1_T8	KRX68866.1_T9	KRY18531.1_T12	TP00418_T4	KRZ77695.1_T10	KRZ17450.1_T11
3709	EFV56901_T1	KRZ59925.1_T2	KRY59918.1_T3	KRX47093.1_T5	KRX73119.1_T6	KRX27558.1_T7	KRZ95158.1_T8	KRX68752.1_T9	KRY18528.1_T12	TP00407_T4	KRZ77708.1_T10	KRZ17417.1_T11
3710	EFV56902_T1	KRZ59957.1_T2	KRY59902.1_T3	KRX47063.1_T5	KRX73125.1_T6	KRX27594.1_T7	KRZ95109.1_T8	KRX68685.1_T9	KRY18561.1_T12	TP00406_T4	KRZ77774.1_T10	KRZ17376.1_T11
3711	EFV56912_T1	KRZ58265.1_T2	KRY46631.1_T3	KRX35414.1_T5	KRX83954.1_T6	KRX27467.1_T7	KRZ87712.1_T8	KRX59743.1_T9	KRY08583.1_T12	TP00429_T4	KRZ77690.1_T10	KRZ17352.1_T11
3712	EFV56913_T1	KRZ58276.1_T2	KRY46629.1_T3	KRX35413.1_T5	KRX84025.1_T6	KRX27512.1_T7	KRZ87738.1_T8	KRX59760.1_T9	KRY08580.1_T12	TP00428_T4	KRZ77754.1_T10	KRZ17363.1_T11
3713	EFV56914_T1	KRZ58264.1_T2	KRY46651.1_T3	KRX35408.1_T5	KRX84042.1_T6	KRX27597.1_T7	KRZ87716.1_T8	KRX59753.1_T9	KRY08576.1_T12	TP00427_T4	KRZ77773.1_T10	KRZ17438.1_T11
3714	EFV56915_T1	KRZ58267.1_T2	KRY46646.1_T3	KRX35412.1_T5	KRX84066.1_T6	KRX27493.1_T7	KRZ87730.1_T8	KRX59732.1_T9	KRY08575.1_T12	TP00426_T4	KRZ77768.1_T10	KRZ17355.1_T11
3715	EFV56925_T1	KRZ54651.1_T2	KRY59696.1_T3	KRX45133.1_T5	KRX84035.1_T6	KRX27522.1_T7	KRZ87729.1_T8	KRX56052.1_T9	KRY21144.1_T12	TP00431_T4	KRZ75851.1_T10	KRZ17435.1_T11
3716	EFV56947_T1	KRZ59013.1_T2	KRY59690.1_T3	KRX41663.1_T5	KRX84056.1_T6	KRX27533.1_T7	KRZ88904.1_T8	KRX64692.1_T9	KRY21135.1_T12	TP00014_T4	KRZ69066.1_T10	KRZ06987.1_T11
3717	EFV56949_T1	KRZ59057.1_T2	KRY59669.1_T3	KRX41690.1_T5	KRX84026.1_T6	KRX27381.1_T7	KRZ88930.1_T8	KRX64616.1_T9	KRY21101.1_T12	TP00016_T4	KRZ69083.1_T10	KRZ06976.1_T11
3718	EFV56952_T1	KRZ59032.1_T2	KRY59759.1_T3	KRX41680.1_T5	KRX84072.1_T6	KRX27410.1_T7	KRZ88949.1_T8	KRX64653.1_T9	KRY21119.1_T12	TP00020_T4	KRZ69057.1_T10	KRZ07002.1_T11
3719	EFV56957_T1	KRZ48331.1_T2	KRY59705.1_T3	KRX35700.1_T5	KRX83913.1_T6	KRX27495.1_T7	KRZ88898.1_T8	KRX51804.1_T9	KRY21162.1_T12	TP00022_T4	KRZ80287.1_T10	KRZ16625.1_T11
3720	EFV56964_T1	KRZ54640.1_T2	KRY59747.1_T3	KRX45143.1_T5	KRX83951.1_T6	KRX27364.1_T7	KRZ87699.1_T8	KRX56058.1_T9	KRY21155.1_T12	TP00454_T4	KRZ75834.1_T10	KRZ13732.1_T11
3721	EFV56965_T1	KRZ54645.1_T2	KRY59697.1_T3	KRX45130.1_T5	KRX83927.1_T6	KRX27489.1_T7	KRZ87723.1_T8	KRX56044.1_T9	KRY21059.1_T12	TP00452_T4	KRZ75812.1_T10	KRZ13672.1_T11
3722	EFV56966_T1	KRZ54628.1_T2	KRY59746.1_T3	KRX45114.1_T5	KRX84041.1_T6	KRX27432.1_T7	KRZ87747.1_T8	KRX56056.1_T9	KRY21077.1_T12	TP00451_T4	KRZ75787.1_T10	KRZ13683.1_T11
3723	EFV56969_T1	KRZ54618.1_T2	KRY59678.1_T3	KRX45116.1_T5	KRX83996.1_T6	KRX27610.1_T7	KRZ87745.1_T8	KRX56034.1_T9	KRY21066.1_T12	TP00448_T4	KRZ75870.1_T10	KRZ13701.1_T11
3724	EFV56971_T1	KRZ54649.1_T2	KRY59751.1_T3	KRX45136.1_T5	KRX83976.1_T6	KRX27463.1_T7	KRZ87717.1_T8	KRX56055.1_T9	KRY21141.1_T12	TP00447_T4	KRZ75842.1_T10	KRZ13677.1_T11
3725	EFV56972_T1	KRZ54641.1_T2	KRY59643.1_T3	KRX45131.1_T5	KRX83961.1_T6	KRX27550.1_T7	KRZ87720.1_T8	KRX56046.1_T9	KRY21095.1_T12	TP00446_T4	KRZ75844.1_T10	KRZ13692.1_T11
3726	EFV56973_T1	KRZ54642.1_T2	KRY59781.1_T3	KRX45111.1_T5	KRX83949.1_T6	KRX27431.1_T7	KRZ87744.1_T8	KRX56049.1_T9	KRY21109.1_T12	TP00444_T4	KRZ75831.1_T10	KRZ17330.1_T11
3727	EFV57003_T1	KRZ58989.1_T2	KRY59757.1_T3	KRX41665.1_T5	KRX84038.1_T6	KRX27560.1_T7	KRZ88927.1_T8	KRX64558.1_T9	KRY21075.1_T12	TP00002_T4	KRZ69053.1_T10	KRZ06991.1_T11
3728	EFV57021_T1	KRZ48652.1_T2	KRY50233.1_T3	KRX34305.1_T5	KRX71239.1_T6	KRX27598.1_T7	KRZ88908.1_T8	KRX51716.1_T9	KRY21068.1_T12	TP06964_T4	KRZ68624.1_T10	KRZ06975.1_T11
3729	EFV57028_T1	KRZ49596.1_T2	KRY59783.1_T3	KRX49470.1_T5	KRX74237.1_T6	KRX15963.1_T7	KRZ95117.1_T8	KRX64595.1_T9	KRY21134.1_T12	TP06936_T4	KRZ66384.1_T10	KRZ07771.1_T11
3730	EFV57031_T1	KRZ49598.1_T2	KRY59742.1_T3	KRX49462.1_T5	KRX74217.1_T6	KRX15985.1_T7	KRZ95145.1_T8	KRX64577.1_T9	KRY21087.1_T12	TP06949_T4	KRZ66391.1_T10	KRZ07746.1_T11
3731	EFV57032_T1	KRZ49591.1_T2	KRY59765.1_T3	KRX49467.1_T5	KRX74214.1_T6	KRX15954.1_T7	KRZ95198.1_T8	KRX64555.1_T9	KRY21156.1_T12	TP06948_T4	KRZ66390.1_T10	KRZ07740.1_T11
3732	EFV57036_T1	KRZ50155.1_T2	KRY59683.1_T3	KRX35418.1_T5	KRX77295.1_T6	KRX26756.1_T7	KRZ95120.1_T8	KRX64554.1_T9	KRY21137.1_T12	TP06954_T4	KRZ68622.1_T10	KRZ07752.1_T11
3733	EFV57038_T1	KRZ49593.1_T2	KRY59687.1_T3	KRX49431.1_T5	KRX74207.1_T6	KRX15987.1_T7	KRZ95086.1_T8	KRX64672.1_T9	KRY21067.1_T12	TP06931_T4	KRZ66383.1_T10	KRZ07761.1_T11
3734	EFV57040_T1	KRZ62257.1_T2	KRY46446.1_T3	KRX36956.1_T5	KRX74228.1_T6	KRX15986.1_T7	KRZ95074.1_T8	KRX58030.1_T9	KRY10033.1_T12	TP06923_T4	KRZ71185.1_T10	KRZ07758.1_T11
3735	EFV57043_T1	KRZ62323.1_T2	KRY46457.1_T3	KRX36955.1_T5	KRX74203.1_T6	KRX15970.1_T7	KRZ95044.1_T8	KRX58062.1_T9	KRY10035.1_T12	TP06926_T4	KRZ71187.1_T10	KRZ07776.1_T11
3736	EFV57052_T1	KRZ63104.1_T2	KRY54954.1_T3	KRX40782.1_T5	KRX83552.1_T6	KRX23279.1_T7	KRZ88184.1_T8	KRX60139.1_T9	KRY23873.1_T12	TP06902_T4	KRZ79909.1_T10	KRZ07724.1_T11
3737	EFV57056_T1	KRZ63135.1_T2	KRY54897.1_T3	KRX40779.1_T5	KRX83557.1_T6	KRX23347.1_T7	KRZ88173.1_T8	KRX60123.1_T9	KRY23993.1_T12	TP06905_T4	KRZ79923.1_T10	KRZ07737.1_T11
3738	EFV57057_T1	KRZ63076.1_T2	KRY54900.1_T3	KRX40773.1_T5	KRX83622.1_T6	KRX23280.1_T7	KRZ88162.1_T8	KRX60167.1_T9	KRY24003.1_T12	TP06906_T4	KRZ80124.1_T10	KRZ07753.1_T11
3739	EFV57058_T1	KRZ63057.1_T2	KRY54915.1_T3	KRX40765.1_T5	KRX83540.1_T6	KRX15980.1_T7	KRZ88182.1_T8	KRX58040.1_T9	KRY23947.1_T12	TP06909_T4	KRZ79914.1_T10	KRZ02370.1_T11
3740	EFV57060_T1	KRZ63058.1_T2	KRY54928.1_T3	KRX40774.1_T5	KRX83551.1_T6	KRX15960.1_T7	KRZ88148.1_T8	KRX58078.1_T9	KRY23781.1_T12	TP06911_T4	KRZ80045.1_T10	KRZ02366.1_T11
3741	EFV57061_T1	KRZ63078.1_T2	KRY54902.1_T3	KRX40764.1_T5	KRX83566.1_T6	KRX15974.1_T7	KRZ88154.1_T8	KRX58044.1_T9	KRY23844.1_T12	TP06913_T4	KRZ79992.1_T10	KRZ02363.1_T11
3742	EFV57062_T1	KRZ63091.1_T2	KRY54937.1_T3	KRX40766.1_T5	KRX83571.1_T6	KRX15971.1_T7	KRZ88132.1_T8	KRX58064.1_T9	KRY23927.1_T12	TP06914_T4	KRZ80083.1_T10	KRZ02377.1_T11
3743	EFV57065_T1	KRZ63111.1_T2	KRY54916.1_T3	KRX40757.1_T5	KRX83559.1_T6	KRX23243.1_T7	KRZ88138.1_T8	KRX60115.1_T9	KRY23894.1_T12	TP06898_T4	KRZ79978.1_T10	KRZ07763.1_T11
3744	EFV57068_T1	KRZ63115.1_T2	KRY59350.1_T3	KRX47984.1_T5	KRX83620.1_T6	KRX23315.1_T7	KRZ90705.1_T8	KRX67025.1_T9	KRY23881.1_T12	TP05558_T4	KRZ80026.1_T10	KRZ14709.1_T11
3746	EFV57073_T1	KRZ63062.1_T2	KRY59312.1_T3	KRX47967.1_T5	KRX83548.1_T6	KRX23303.1_T7	KRZ90709.1_T8	KRX67124.1_T9	KRY23975.1_T12	TP05563_T4	KRZ79954.1_T10	KRZ14789.1_T11
3747	EFV57079_T1	KRZ63100.1_T2	KRY59403.1_T3	KRX47976.1_T5	KRX83618.1_T6	KRX23307.1_T7	KRZ90650.1_T8	KRX67135.1_T9	KRY23961.1_T12	TP06889_T4	KRZ80093.1_T10	KRZ14785.1_T11
3748	EFV57080_T1	KRZ63093.1_T2	KRY59324.1_T3	KRX48005.1_T5	KRX83646.1_T6	KRX23300.1_T7	KRZ90722.1_T8	KRX67100.1_T9	KRY23791.1_T12	TP06890_T4	KRZ79915.1_T10	KRZ14684.1_T11
3749	EFV57096_T1	KRZ63147.1_T2	KRY54898.1_T3	KRX40776.1_T5	KRX83544.1_T6	KRX23344.1_T7	KRZ88170.1_T8	KRX60166.1_T9	KRY23974.1_T12	TP06897_T4	KRZ80036.1_T10	KRZ02346.1_T11
3750	EFV57100_T1	KRZ63130.1_T2	KRY59305.1_T3	KRX48010.1_T5	KRX83565.1_T6	KRX23341.1_T7	KRZ87977.1_T8	KRX67073.1_T9	KRY23833.1_T12	TP05552_T4	KRZ79933.1_T10	KRZ14746.1_T11
3751	EFV57104_T1	KRZ63051.1_T2	KRY59316.1_T3	KRX48008.1_T5	KRX83541.1_T6	KRX23340.1_T7	KRZ90701.1_T8	KRX67140.1_T9	KRY24034.1_T12	TP05556_T4	KRZ80107.1_T10	KRZ14728.1_T11
3752	EFV57109_T1	KRZ63134.1_T2	KRY59241.1_T3	KRX37055.1_T5	KRX83611.1_T6	KRX23339.1_T7	KRZ87959.1_T8	KRX57266.1_T9	KRY23794.1_T12	TP05538_T4	KRZ80028.1_T10	KRZ14683.1_T11
3753	EFV57111_T1	KRZ63102.1_T2	KRY59230.1_T3	KRX37054.1_T5	KRX83550.1_T6	KRX23309.1_T7	KRZ87983.1_T8	KRX57263.1_T9	KRY23816.1_T12	TP05540_T4	KRZ80012.1_T10	KRZ14788.1_T11
3754	EFV57113_T1	KRZ63084.1_T2	KRY59307.1_T3	KRX47972.1_T5	KRX83543.1_T6	KRX23329.1_T7	KRZ87941.1_T8	KRX67098.1_T9	KRY23913.1_T12	TP05542_T4	KRZ80111.1_T10	KRZ14732.1_T11
3755	EFV57128_T1	KRZ63113.1_T2	KRY59278.1_T3	KRX37057.1_T5	KRX83650.1_T6	KRX23283.1_T7	KRZ87961.1_T8	KRX57261.1_T9	KRY23785.1_T12	TP05535_T4	KRZ80127.1_T10	KRZ14675.1_T11
3756	EFV57131_T1	KRZ63082.1_T2	KRY59200.1_T3	KRX37059.1_T5	KRX83573.1_T6	KRX23251.1_T7	KRZ87967.1_T8	KRX57259.1_T9	KRY23987.1_T12	TP05537_T4	KRZ79932.1_T10	KRZ14730.1_T11
3757	EFV57136_T1	KRZ63055.1_T2	KRY59239.1_T3	KRX39130.1_T5	KRX83586.1_T6	KRX23319.1_T7	KRZ87929.1_T8	KRX53555.1_T9	KRY23964.1_T12	TP05515_T4	KRZ80041.1_T10	KRZ14719.1_T11
3758	EFV57137_T1	KRZ63068.1_T2	KRY59216.1_T3	KRX39123.1_T5	KRX83648.1_T6	KRX23266.1_T7	KRZ87981.1_T8	KRX53563.1_T9	KRY23973.1_T12	TP05516_T4	KRZ80143.1_T10	KRZ14776.1_T11
3759	EFV57138_T1	KRZ63156.1_T2	KRY59228.1_T3	KRX39127.1_T5	KRX83567.1_T6	KRX23272.1_T7	KRZ87946.1_T8	KRX53569.1_T9	KRY23863.1_T12	TP05518_T4	KRZ80006.1_T10	KRZ14696.1_T11
3760	EFV57139_T1	KRZ63086.1_T2	KRY59222.1_T3	KRX39128.1_T5	KRX83610.1_T6	KRX23242.1_T7	KRZ87985.1_T8	KRX53564.1_T9	KRY23835.1_T12	TP05519_T4	KRZ80086.1_T10	KRZ14787.1_T11
3761	EFV57143_T1	KRZ63159.1_T2	KRY59194.1_T3	KRX39134.1_T5	KRX83579.1_T6	KRX23269.1_T7	KRZ87948.1_T8	KRX53565.1_T9	KRY23972.1_T12	TP05520_T4	KRZ79940.1_T10	KRZ14697.1_T11
3762	EFV57144_T1	KRZ63098.1_T2	KRY59234.1_T3	KRX39132.1_T5	KRX83642.1_T6	KRX23342.1_T7	KRZ87987.1_T8	KRX53554.1_T9	KRY23889.1_T12	TP05521_T4	KRZ80016.1_T10	KRZ14723.1_T11
3763	EFV57148_T1	KRZ63075.1_T2	KRY59265.1_T3	KRX39137.1_T5	KRX83546.1_T6	KRX23294.1_T7	KRZ87972.1_T8	KRX53548.1_T9	KRY23886.1_T12	TP05527_T4	KRZ80095.1_T10	KRZ14741.1_T11
3764	EFV57151_T1	KRZ63049.1_T2	KRY59263.1_T3	KRX39120.1_T5	KRX83542.1_T6	KRX23262.1_T7	KRZ87936.1_T8	KRX53566.1_T9	KRY23890.1_T12	TP05529_T4	KRZ79993.1_T10	KRZ14690.1_T11
3765	EFV57159_T1	KRZ51168.1_T2	KRY59252.1_T3	KRX49561.1_T5	KRX71572.1_T6	KRX23332.1_T7	KRZ96436.1_T8	KRX57273.1_T9	KRY21332.1_T12	TP05507_T4	KRZ80075.1_T10	KRZ14677.1_T11
3766	EFV57160_T1	KRZ51163.1_T2	KRY59270.1_T3	KRX49577.1_T5	KRX71582.1_T6	KRX23296.1_T7	KRZ96550.1_T8	KRX57290.1_T9	KRY21346.1_T12	TP05508_T4	KRZ80035.1_T10	KRZ14745.1_T11
3767	EFV57163_T1	KRZ51161.1_T2	KRY59292.1_T3	KRX49555.1_T5	KRX71578.1_T6	KRX23356.1_T7	KRZ96584.1_T8	KRX57281.1_T9	KRY21297.1_T12	TP05510_T4	KRZ79995.1_T10	KRZ14707.1_T11
3768	EFV57164_T1	KRZ51180.1_T2	KRY59183.1_T3	KRX49531.1_T5	KRX71574.1_T6	KRX23286.1_T7	KRZ96568.1_T8	KRX57284.1_T9	KRY21310.1_T12	TP05511_T4	KRZ79987.1_T10	KRZ14783.1_T11
3769	EFV57169_T1	KRZ62330.1_T2	KRY50031.1_T3	KRX42444.1_T5	KRX82021.1_T6	KRX16025.1_T7	KRZ96423.1_T8	KRX62643.1_T9	KRY21405.1_T12	TP05481_T4	KRZ71189.1_T10	KRZ05186.1_T11
3770	EFV57170_T1	KRZ62260.1_T2	KRY50045.1_T3	KRX42452.1_T5	KRX81952.1_T6	KRX16010.1_T7	KRZ96439.1_T8	KRX62691.1_T9	KRY21300.1_T12	TP05482_T4	KRZ71223.1_T10	KRZ05197.1_T11
3771	EFV57172_T1	KRZ62275.1_T2	KRY50022.1_T3	KRX42461.1_T5	KRX82020.1_T6	KRX15997.1_T7	KRZ96538.1_T8	KRX62658.1_T9	KRY21363.1_T12	TP05487_T4	KRZ71194.1_T10	KRZ05195.1_T11
3772	EFV57177_T1	KRZ62310.1_T2	KRY50034.1_T3	KRX42433.1_T5	KRX82013.1_T6	KRX15998.1_T7	KRZ96409.1_T8	KRX62656.1_T9	KRY21372.1_T12	TP05494_T4	KRZ71196.1_T10	KRZ05194.1_T11
3773	EFV57180_T1	KRZ62274.1_T2	KRY50020.1_T3	KRX42436.1_T5	KRX82006.1_T6	KRX16001.1_T7	KRZ96429.1_T8	KRX62711.1_T9	KRY21349.1_T12	TP05497_T4	KRZ71205.1_T10	KRZ05203.1_T11
3774	EFV57181_T1	KRZ62279.1_T2	KRY50043.1_T3	KRX42435.1_T5	KRX81981.1_T6	KRX16004.1_T7	KRZ96421.1_T8	KRX62628.1_T9	KRY21336.1_T12	TP05498_T4	KRZ71220.1_T10	KRZ05191.1_T11
3775	EFV57183_T1	KRZ62284.1_T2	KRY50019.1_T3	KRX42465.1_T5	KRX81989.1_T6	KRX16012.1_T7	KRZ96467.1_T8	KRX62636.1_T9	KRY21305.1_T12	TP05503_T4	KRZ71186.1_T10	KRZ14685.1_T11
3776	EFV57185_T1	KRZ62292.1_T2	KRY50048.1_T3	KRX42460.1_T5	KRX82057.1_T6	KRX16014.1_T7	KRZ96523.1_T8	KRX62648.1_T9	KRY21292.1_T12	TP05504_T4	KRZ71234.1_T10	KRZ14680.1_T11
3777	EFV57187_T1	KRZ62289.1_T2	KRY50032.1_T3	KRX42464.1_T5	KRX81999.1_T6	KRX15989.1_T7	KRZ96424.1_T8	KRX62680.1_T9	KRY21302.1_T12	TP05505_T4	KRZ71217.1_T10	KRZ14716.1_T11
3778	EFV57194_T1	KRZ62326.1_T2	KRY60338.1_T3	KRX47192.1_T5	KRX81957.1_T6	KRX27271.1_T7	KRZ96455.1_T8	KRX62702.1_T9	KRY23187.1_T12	TP06602_T4	KRZ76297.1_T10	KRZ16110.1_T11
3779	EFV57198_T1	KRZ62300.1_T2	KRY60466.1_T3	KRX47203.1_T5	KRX81982.1_T6	KRX27272.1_T7	KRZ96496.1_T8	KRX62700.1_T9	KRY23152.1_T12	TP06607_T4	KRZ76359.1_T10	KRZ16141.1_T11
3780	EFV57200_T1	KRZ62252.1_T2	KRY60400.1_T3	KRX47238.1_T5	KRX82024.1_T6	KRX27178.1_T7	KRZ96535.1_T8	KRX62703.1_T9	KRY23144.1_T12	TP06609_T4	KRZ76335.1_T10	KRZ16226.1_T11
3781	EFV57202_T1	KRZ62344.1_T2	KRY60363.1_T3	KRX47184.1_T5	KRX81970.1_T6	KRX27231.1_T7	KRZ96461.1_T8	KRX62622.1_T9	KRY23051.1_T12	TP06610_T4	KRZ76379.1_T10	KRZ16145.1_T11
3782	EFV57203_T1	KRZ62311.1_T2	KRY60350.1_T3	KRX47177.1_T5	KRX81990.1_T6	KRX27228.1_T7	KRZ96609.1_T8	KRX62709.1_T9	KRY23076.1_T12	TP06611_T4	KRZ76287.1_T10	KRZ16209.1_T11
3783	EFV57205_T1	KRZ62299.1_T2	KRY60365.1_T3	KRX47241.1_T5	KRX81962.1_T6	KRX27307.1_T7	KRZ96414.1_T8	KRX62663.1_T9	KRY23203.1_T12	TP06614_T4	KRZ76362.1_T10	KRZ16197.1_T11
3784	EFV57206_T1	KRZ62262.1_T2	KRY60327.1_T3	KRX47240.1_T5	KRX82004.1_T6	KRX27306.1_T7	KRZ96481.1_T8	KRX62614.1_T9	KRY23078.1_T12	TP06615_T4	KRZ76310.1_T10	KRZ16202.1_T11
3785	EFV57207_T1	KRZ62280.1_T2	KRY60326.1_T3	KRX47219.1_T5	KRX82025.1_T6	KRX27328.1_T7	KRZ96512.1_T8	KRX62701.1_T9	KRY23110.1_T12	TP06616_T4	KRZ76343.1_T10	KRZ16216.1_T11
3786	EFV57208_T1	KRZ62308.1_T2	KRY60409.1_T3	KRX47231.1_T5	KRX81972.1_T6	KRX27325.1_T7	KRZ96487.1_T8	KRX62664.1_T9	KRY23035.1_T12	TP06617_T4	KRZ76350.1_T10	KRZ16127.1_T11
3787	EFV57211_T1	KRZ62354.1_T2	KRY60430.1_T3	KRX47211.1_T5	KRX81992.1_T6	KRX27323.1_T7	KRZ96597.1_T8	KRX62653.1_T9	KRY21396.1_T12	TP06622_T4	KRZ76278.1_T10	KRZ16184.1_T11
3788	EFV57212_T1	KRZ62338.1_T2	KRY60403.1_T3	KRX47178.1_T5	KRX82033.1_T6	KRX27189.1_T7	KRZ96482.1_T8	KRX62655.1_T9	KRY21388.1_T12	TP06623_T4	KRZ76364.1_T10	KRZ16107.1_T11
3789	EFV57219_T1	KRZ62321.1_T2	KRY60467.1_T3	KRX47237.1_T5	KRX81996.1_T6	KRX27119.1_T7	KRZ96490.1_T8	KRX62712.1_T9	KRY21390.1_T12	TP06627_T4	KRZ76301.1_T10	KRZ16120.1_T11
3790	EFV57220_T1	KRZ62325.1_T2	KRY60459.1_T3	KRX47214.1_T5	KRX82030.1_T6	KRX27117.1_T7	KRZ96479.1_T8	KRX62668.1_T9	KRY21403.1_T12	TP06628_T4	KRZ76348.1_T10	KRZ16115.1_T11
3791	EFV57227_T1	KRZ62324.1_T2	KRY60442.1_T3	KRX47215.1_T5	KRX81980.1_T6	KRX27314.1_T7	KRZ96448.1_T8	KRX62675.1_T9	KRY21385.1_T12	TP06632_T4	KRZ76319.1_T10	KRZ16100.1_T11
3792	EFV57233_T1	KRZ62272.1_T2	KRY60458.1_T3	KRX47181.1_T5	KRX82018.1_T6	KRX27286.1_T7	KRZ96549.1_T8	KRX62687.1_T9	KRY21333.1_T12	TP06637_T4	KRZ76381.1_T10	KRZ16224.1_T11
3793	EFV57234_T1	KRZ62337.1_T2	KRY60314.1_T3	KRX47199.1_T5	KRX81958.1_T6	KRX27312.1_T7	KRZ96602.1_T8	KRX62631.1_T9	KRY21321.1_T12	TP06639_T4	KRZ76299.1_T10	KRZ16163.1_T11
3794	EFV57237_T1	KRZ62349.1_T2	KRY60390.1_T3	KRX47207.1_T5	KRX82026.1_T6	KRX27251.1_T7	KRZ96577.1_T8	KRX62635.1_T9	KRY21374.1_T12	TP06640_T4	KRZ76369.1_T10	KRZ16122.1_T11
3795	EFV57239_T1	KRZ62256.1_T2	KRY60427.1_T3	KRX47189.1_T5	KRX82055.1_T6	KRX27216.1_T7	KRZ96509.1_T8	KRX62633.1_T9	KRY21400.1_T12	TP06642_T4	KRZ76374.1_T10	KRZ16085.1_T11
3796	EFV57253_T1	KRZ58212.1_T2	KRY55154.1_T3	KRX35870.1_T5	KRX83923.1_T6	KRX27237.1_T7	KRZ85003.1_T8	KRX53198.1_T9	KRY23108.1_T12	TP06580_T4	KRZ69027.1_T10	KRZ16089.1_T11
3797	EFV57254_T1	KRZ58193.1_T2	KRY55176.1_T3	KRX35879.1_T5	KRX83944.1_T6	KRX27199.1_T7	KRZ84971.1_T8	KRX53199.1_T9	KRY23075.1_T12	TP06581_T4	KRZ69009.1_T10	KRZ16138.1_T11
3798	EFV57255_T1	KRZ58239.1_T2	KRY55133.1_T3	KRX35881.1_T5	KRX83910.1_T6	KRX27129.1_T7	KRZ84999.1_T8	KRX53202.1_T9	KRY23206.1_T12	TP06582_T4	KRZ69048.1_T10	KRZ16075.1_T11
3799	EFV57258_T1	KRZ58236.1_T2	KRY55134.1_T3	KRX35871.1_T5	KRX83968.1_T6	KRX27143.1_T7	KRZ84975.1_T8	KRX53188.1_T9	KRY23117.1_T12	TP06583_T4	KRZ69045.1_T10	KRZ16137.1_T11
3800	EFV57259_T1	KRZ58202.1_T2	KRY55142.1_T3	KRX35873.1_T5	KRX84049.1_T6	KRX27234.1_T7	KRZ84976.1_T8	KRX53206.1_T9	KRY23193.1_T12	TP06585_T4	KRZ69028.1_T10	KRZ16225.1_T11
3801	EFV57263_T1	KRZ58207.1_T2	KRY55178.1_T3	KRX38079.1_T5	KRX84043.1_T6	KRX27284.1_T7	KRZ84992.1_T8	KRX53309.1_T9	KRY23054.1_T12	TP06592_T4	KRZ76353.1_T10	KRZ16147.1_T11
3802	EFV57265_T1	KRZ58180.1_T2	KRY55149.1_T3	KRX38081.1_T5	KRX83933.1_T6	KRX27233.1_T7	KRZ84974.1_T8	KRX53302.1_T9	KRY23050.1_T12	TP06594_T4	KRZ76300.1_T10	KRZ16109.1_T11
3803	EFV57268_T1	KRZ58179.1_T2	KRY55135.1_T3	KRX35941.1_T5	KRX84065.1_T6	KRX27241.1_T7	KRZ84988.1_T8	KRX53303.1_T9	KRY23195.1_T12	TP06597_T4	KRZ76341.1_T10	KRZ16205.1_T11
3804	EFV57269_T1	KRZ58217.1_T2	KRY55193.1_T3	KRX35936.1_T5	KRX84053.1_T6	KRX27268.1_T7	KRZ84983.1_T8	KRX53313.1_T9	KRY23040.1_T12	TP06598_T4	KRZ76334.1_T10	KRZ16153.1_T11
3805	EFV57280_T1	KRZ52731.1_T2	KRY50401.1_T3	KRX39566.1_T5	KRX71901.1_T6	KRX13051.1_T7	KRZ93243.1_T8	KRX58536.1_T9	KRY11329.1_T12	TP06462_T4	KRZ70997.1_T10	KRZ16077.1_T11
3806	EFV57281_T1	KRZ52750.1_T2	KRY50369.1_T3	KRX39557.1_T5	KRX71909.1_T6	KRX22901.1_T7	KRZ93191.1_T8	KRX58533.1_T9	KRY11333.1_T12	TP06460_T4	KRZ71006.1_T10	KRZ16125.1_T11
3807	EFV57283_T1	KRZ52745.1_T2	KRY50399.1_T3	KRX39563.1_T5	KRX71897.1_T6	KRX22865.1_T7	KRZ93211.1_T8	KRX58539.1_T9	KRY11337.1_T12	TP06458_T4	KRZ70989.1_T10	KRZ16158.1_T11
3808	EFV57285_T1	KRZ52740.1_T2	KRY50375.1_T3	KRX39556.1_T5	KRX71883.1_T6	KRX22853.1_T7	KRZ93212.1_T8	KRX58556.1_T9	KRY11325.1_T12	TP06455_T4	KRZ70975.1_T10	KRZ16150.1_T11
3810	EFV57292_T1	KRZ52730.1_T2	KRY50397.1_T3	KRX37173.1_T5	KRX83985.1_T6	KRX13190.1_T7	KRZ85393.1_T8	KRX52373.1_T9	KRY23168.1_T12	TP06545_T4	KRZ70991.1_T10	KRZ16099.1_T11
3811	EFV57302_T1	KRZ48355.1_T2	KRY45437.1_T3	KRX35946.1_T5	KRX71425.1_T6	KRX13884.1_T7	KRZ97836.1_T8	KRX53192.1_T9	KRY08108.1_T12	TP06550_T4	KRZ70986.1_T10	KRZ16095.1_T11
3812	EFV57303_T1	KRZ48358.1_T2	KRY45439.1_T3	KRX35947.1_T5	KRX71435.1_T6	KRX13865.1_T7	KRZ97793.1_T8	KRX53201.1_T9	KRY08111.1_T12	TP06551_T4	KRZ70976.1_T10	KRZ16090.1_T11
3813	EFV57304_T1	KRZ48353.1_T2	KRY45435.1_T3	KRX35945.1_T5	KRX71430.1_T6	KRX13875.1_T7	KRZ97679.1_T8	KRX53207.1_T9	KRY08110.1_T12	TP06552_T4	KRZ70994.1_T10	KRZ16117.1_T11
3814	EFV57308_T1	KRZ53675.1_T2	KRY54578.1_T3	KRX36875.1_T5	KRX76013.1_T6	KRX13888.1_T7	KRZ97785.1_T8	KRX58575.1_T9	KRY21233.1_T12	TP06554_T4	KRZ70999.1_T10	KRZ16204.1_T11
3815	EFV57311_T1	KRZ53665.1_T2	KRY54612.1_T3	KRX36868.1_T5	KRX76017.1_T6	KRX24503.1_T7	KRZ97766.1_T8	KRX58561.1_T9	KRY21202.1_T12	TP06557_T4	KRZ69029.1_T10	KRZ16096.1_T11
3816	EFV57313_T1	KRZ53680.1_T2	KRY54583.1_T3	KRX36878.1_T5	KRX76022.1_T6	KRX24560.1_T7	KRZ97804.1_T8	KRX58545.1_T9	KRY21212.1_T12	TP06558_T4	KRZ69026.1_T10	KRZ16237.1_T11
3817	EFV57321_T1	KRZ58247.1_T2	KRY55128.1_T3	KRX38521.1_T5	KRX76024.1_T6	KRX27324.1_T7	KRZ86083.1_T8	KRX58579.1_T9	KRY21387.1_T12	TP06568_T4	KRZ69039.1_T10	KRZ16164.1_T11
3818	EFV57322_T1	KRZ58192.1_T2	KRY55198.1_T3	KRX38525.1_T5	KRX76064.1_T6	KRX27163.1_T7	KRZ86099.1_T8	KRX58532.1_T9	KRY21393.1_T12	TP06569_T4	KRZ69034.1_T10	KRZ16080.1_T11
3819	EFV57331_T1	KRZ58235.1_T2	KRY55180.1_T3	KRX38536.1_T5	KRX76055.1_T6	KRX27293.1_T7	KRZ86089.1_T8	KRX58563.1_T9	KRY21320.1_T12	TP06573_T4	KRZ69043.1_T10	KRZ16106.1_T11
3820	EFV57341_T1	KRZ61565.1_T2	KRY55590.1_T3	KRX42243.1_T5	KRX76800.1_T6	KRX14943.1_T7	KRZ90658.1_T8	KRX63122.1_T9	KRY14335.1_T12	TP06492_T4	KRZ74163.1_T10	KRZ19415.1_T11
3821	EFV57346_T1	KRZ61557.1_T2	KRY55552.1_T3	KRX42239.1_T5	KRX76830.1_T6	KRX14951.1_T7	KRZ90717.1_T8	KRX63099.1_T9	KRY14329.1_T12	TP06485_T4	KRZ74154.1_T10	KRZ19326.1_T11
3822	EFV57349_T1	KRZ61530.1_T2	KRY55593.1_T3	KRX42249.1_T5	KRX76811.1_T6	KRX14945.1_T7	KRZ90714.1_T8	KRX63059.1_T9	KRY14333.1_T12	TP06482_T4	KRZ74100.1_T10	KRZ19295.1_T11
3823	EFV57352_T1	KRZ61520.1_T2	KRY55610.1_T3	KRX42247.1_T5	KRX76808.1_T6	KRX14931.1_T7	KRZ90664.1_T8	KRX63037.1_T9	KRY14309.1_T12	TP06479_T4	KRZ74159.1_T10	KRZ19309.1_T11
3824	EFV57354_T1	KRZ61484.1_T2	KRY55592.1_T3	KRX42217.1_T5	KRX76809.1_T6	KRX14941.1_T7	KRZ90716.1_T8	KRX63064.1_T9	KRY14299.1_T12	TP06477_T4	KRZ74162.1_T10	KRZ19374.1_T11
3825	EFV57358_T1	KRZ61570.1_T2	KRY55579.1_T3	KRX42233.1_T5	KRX76812.1_T6	KRX14954.1_T7	KRZ90695.1_T8	KRX63051.1_T9	KRY16330.1_T12	TP06474_T4	KRZ74180.1_T10	KRZ19260.1_T11
3827	EFV57361_T1	KRZ61581.1_T2	KRY55573.1_T3	KRX42214.1_T5	KRX76837.1_T6	KRX14949.1_T7	KRZ90693.1_T8	KRX63100.1_T9	KRY16278.1_T12	TP06471_T4	KRZ74165.1_T10	KRZ19343.1_T11
3828	EFV57365_T1	KRZ53333.1_T2	KRY55568.1_T3	KRX36701.1_T5	KRX76806.1_T6	KRX25627.1_T7	KRZ93359.1_T8	KRX63002.1_T9	KRY12360.1_T12	TP06501_T4	KRZ74124.1_T10	KRZ19319.1_T11
3829	EFV57367_T1	KRZ53347.1_T2	KRY55604.1_T3	KRX34406.1_T5	KRX76810.1_T6	KRX25663.1_T7	KRZ93454.1_T8	KRX63106.1_T9	KRY07658.1_T12	TP06500_T4	KRZ74166.1_T10	KRZ19229.1_T11
3830	EFV57368_T1	KRZ53351.1_T2	KRY55564.1_T3	KRX34405.1_T5	KRX76801.1_T6	KRX25697.1_T7	KRZ93375.1_T8	KRX63044.1_T9	KRY07657.1_T12	TP06498_T4	KRZ74122.1_T10	KRZ19106.1_T11
3831	EFV57371_T1	KRZ53342.1_T2	KRY55576.1_T3	KRX36698.1_T5	KRX69142.1_T6	KRX25658.1_T7	KRZ93325.1_T8	KRX63098.1_T9	KRY12382.1_T12	TP06509_T4	KRZ74114.1_T10	KRZ19073.1_T11
3832	EFV57375_T1	KRZ53349.1_T2	KRY55578.1_T3	KRX36705.1_T5	KRX76834.1_T6	KRX25675.1_T7	KRZ93426.1_T8	KRX62984.1_T9	KRY12379.1_T12	TP06507_T4	KRZ74156.1_T10	KRZ19047.1_T11
3833	EFV57386_T1	KRZ53343.1_T2	KRY55553.1_T3	KRX46292.1_T5	KRX78393.1_T6	KRX25612.1_T7	KRZ93337.1_T8	KRX63013.1_T9	KRY12359.1_T12	TP06522_T4	KRZ74121.1_T10	KRZ19064.1_T11
3834	EFV57388_T1	KRZ53345.1_T2	KRY55565.1_T3	KRX46313.1_T5	KRX78418.1_T6	KRX25597.1_T7	KRZ93437.1_T8	KRX63016.1_T9	KRY12364.1_T12	TP06521_T4	KRZ74171.1_T10	KRZ19441.1_T11
3835	EFV57390_T1	KRZ53344.1_T2	KRY55558.1_T3	KRX46295.1_T5	KRX78434.1_T6	KRX25719.1_T7	KRZ93449.1_T8	KRX62995.1_T9	KRY12365.1_T12	TP06518_T4	KRZ74113.1_T10	KRZ19376.1_T11
3836	EFV57391_T1	KRZ53356.1_T2	KRY55557.1_T3	KRX46306.1_T5	KRX69671.1_T6	KRX25520.1_T7	KRZ93331.1_T8	KRX63007.1_T9	KRY12363.1_T12	TP06517_T4	KRZ74183.1_T10	KRZ19357.1_T11
3837	EFV57393_T1	KRZ53352.1_T2	KRY55611.1_T3	KRX46328.1_T5	KRX69666.1_T6	KRX25651.1_T7	KRZ93346.1_T8	KRX63082.1_T9	KRY12369.1_T12	TP06514_T4	KRZ74182.1_T10	KRZ19179.1_T11
3838	EFV57394_T1	KRZ53324.1_T2	KRY55601.1_T3	KRX46291.1_T5	KRX69670.1_T6	KRX25542.1_T7	KRZ93443.1_T8	KRX63012.1_T9	KRY12370.1_T12	TP06513_T4	KRZ74164.1_T10	KRZ19361.1_T11
3839	EFV57398_T1	KRZ59335.1_T2	KRY51140.1_T3	KRX38015.1_T5	KRX72326.1_T6	KRX25686.1_T7	KRZ93309.1_T8	KRX53865.1_T9	KRY14400.1_T12	TP06540_T4	KRZ68402.1_T10	KRZ19099.1_T11
3840	EFV57399_T1	KRZ59365.1_T2	KRY51154.1_T3	KRX38032.1_T5	KRX72338.1_T6	KRX25555.1_T7	KRZ93356.1_T8	KRX53840.1_T9	KRY14396.1_T12	TP06539_T4	KRZ68394.1_T10	KRZ19031.1_T11
3841	EFV57402_T1	KRZ59304.1_T2	KRY51159.1_T3	KRX38020.1_T5	KRX72323.1_T6	KRX25577.1_T7	KRZ93329.1_T8	KRX53849.1_T9	KRY14392.1_T12	TP06536_T4	KRZ68392.1_T10	KRZ19122.1_T11
3842	EFV57403_T1	KRZ59356.1_T2	KRY51170.1_T3	KRX38022.1_T5	KRX72328.1_T6	KRX25531.1_T7	KRZ93311.1_T8	KRX53833.1_T9	KRY14380.1_T12	TP06535_T4	KRZ68388.1_T10	KRZ19327.1_T11
3843	EFV57404_T1	KRZ59309.1_T2	KRY51162.1_T3	KRX38013.1_T5	KRX72330.1_T6	KRX25578.1_T7	KRZ93377.1_T8	KRX53828.1_T9	KRY14383.1_T12	TP06534_T4	KRZ68408.1_T10	KRZ19331.1_T11
3844	EFV57406_T1	KRZ59358.1_T2	KRY51176.1_T3	KRX38027.1_T5	KRX72340.1_T6	KRX25609.1_T7	KRZ93319.1_T8	KRX53835.1_T9	KRY14404.1_T12	TP06533_T4	KRZ68380.1_T10	KRZ19172.1_T11
3845	EFV57407_T1	KRZ59323.1_T2	KRY51179.1_T3	KRX38034.1_T5	KRX72321.1_T6	KRX25710.1_T7	KRZ93419.1_T8	KRX53834.1_T9	KRY14397.1_T12	TP06532_T4	KRZ68417.1_T10	KRZ19418.1_T11
3846	EFV57408_T1	KRZ59326.1_T2	KRY51181.1_T3	KRX38023.1_T5	KRX72347.1_T6	KRX25623.1_T7	KRZ93396.1_T8	KRX53844.1_T9	KRY14395.1_T12	TP06531_T4	KRZ68395.1_T10	KRZ19173.1_T11
3847	EFV57409_T1	KRZ59303.1_T2	KRY51139.1_T3	KRX38016.1_T5	KRX72324.1_T6	KRX25551.1_T7	KRZ93357.1_T8	KRX53843.1_T9	KRY14422.1_T12	TP06530_T4	KRZ68404.1_T10	KRZ19328.1_T11
3848	EFV57410_T1	KRZ59342.1_T2	KRY51156.1_T3	KRX38035.1_T5	KRX72315.1_T6	KRX25596.1_T7	KRZ93453.1_T8	KRX53848.1_T9	KRY14386.1_T12	TP06529_T4	KRZ68416.1_T10	KRZ19129.1_T11
3849	EFV57412_T1	KRZ59312.1_T2	KRY51164.1_T3	KRX38037.1_T5	KRX72320.1_T6	KRX25606.1_T7	KRZ93429.1_T8	KRX53853.1_T9	KRY14390.1_T12	TP06527_T4	KRZ68419.1_T10	KRZ19156.1_T11
3850	EFV57419_T1	KRZ60261.1_T2	KRY61012.1_T3	KRX50781.1_T5	KRX82677.1_T6	KRX25574.1_T7	KRZ96240.1_T8	KRX68304.1_T9	KRY16288.1_T12	TP06439_T4	KRZ71951.1_T10	KRZ19037.1_T11
3851	EFV57428_T1	KRZ51660.1_T2	KRY61002.1_T3	KRX50801.1_T5	KRX82656.1_T6	KRX25673.1_T7	KRZ96396.1_T8	KRX68340.1_T9	KRY16335.1_T12	TP06448_T4	KRZ71920.1_T10	KRZ19259.1_T11
3852	EFV57430_T1	KRZ51656.1_T2	KRY60895.1_T3	KRX50765.1_T5	KRX82701.1_T6	KRX25602.1_T7	KRZ96296.1_T8	KRX68261.1_T9	KRY16281.1_T12	TP06450_T4	KRZ71930.1_T10	KRZ19384.1_T11
3853	EFV57431_T1	KRZ51664.1_T2	KRY60949.1_T3	KRX50855.1_T5	KRX82665.1_T6	KRX25717.1_T7	KRZ96309.1_T8	KRX68465.1_T9	KRY16303.1_T12	TP06451_T4	KRZ71941.1_T10	KRZ19033.1_T11
3854	EFV57434_T1	KRZ51646.1_T2	KRY61041.1_T3	KRX50873.1_T5	KRX69631.1_T6	KRX25533.1_T7	KRZ96361.1_T8	KRX68475.1_T9	KRY16279.1_T12	TP06452_T4	KRZ71929.1_T10	KRZ19110.1_T11
3855	EFV57437_T1	KRZ51643.1_T2	KRY60944.1_T3	KRX50750.1_T5	KRX69629.1_T6	KRX25547.1_T7	KRZ96371.1_T8	KRX68215.1_T9	KRY16290.1_T12	TP06543_T4	KRZ68384.1_T10	KRZ19264.1_T11
3856	EFV57440_T1	KRZ60256.1_T2	KRY60960.1_T3	KRX50769.1_T5	KRX82714.1_T6	KRX25720.1_T7	KRZ96397.1_T8	KRX68501.1_T9	KRY17118.1_T12	TP06390_T4	KRZ80724.1_T10	KRZ19445.1_T11
3857	EFV57443_T1	KRZ60252.1_T2	KRY61044.1_T3	KRX50834.1_T5	KRX82713.1_T6	KRX25625.1_T7	KRZ96206.1_T8	KRX68228.1_T9	KRY17084.1_T12	TP06394_T4	KRZ80671.1_T10	KRZ19066.1_T11
3858	EFV57444_T1	KRZ60270.1_T2	KRY61058.1_T3	KRX50843.1_T5	KRX82646.1_T6	KRX25605.1_T7	KRZ96271.1_T8	KRX68176.1_T9	KRY17079.1_T12	TP06395_T4	KRZ80977.1_T10	KRZ19113.1_T11
3859	EFV57448_T1	KRZ60265.1_T2	KRY60957.1_T3	KRX50788.1_T5	KRX82717.1_T6	KRX25501.1_T7	KRZ96334.1_T8	KRX68146.1_T9	KRY17095.1_T12	TP06398_T4	KRZ79782.1_T10	KRZ19228.1_T11
3860	EFV57451_T1	KRZ60269.1_T2	KRY61069.1_T3	KRX50833.1_T5	KRX82655.1_T6	KRX25619.1_T7	KRZ96260.1_T8	KRX68408.1_T9	KRY17109.1_T12	TP06403_T4	KRZ79799.1_T10	KRZ19281.1_T11
3861	EFV57453_T1	KRZ60275.1_T2	KRY60982.1_T3	KRX50783.1_T5	KRX82659.1_T6	KRX25704.1_T7	KRZ96227.1_T8	KRX68453.1_T9	KRY17076.1_T12	TP06405_T4	KRZ79745.1_T10	KRZ19060.1_T11
3862	EFV57454_T1	KRZ60273.1_T2	KRY60992.1_T3	KRX50755.1_T5	KRX82743.1_T6	KRX25541.1_T7	KRZ96318.1_T8	KRX68464.1_T9	KRY17117.1_T12	TP06406_T4	KRZ79725.1_T10	KRZ19332.1_T11
3863	EFV57456_T1	KRZ60271.1_T2	KRY60988.1_T3	KRX50813.1_T5	KRX82738.1_T6	KRX25661.1_T7	KRZ96294.1_T8	KRX68264.1_T9	KRY17092.1_T12	TP06407_T4	KRZ79820.1_T10	KRZ19079.1_T11
3864	EFV57457_T1	KRZ60214.1_T2	KRY61050.1_T3	KRX50869.1_T5	KRX82694.1_T6	KRX25603.1_T7	KRZ96345.1_T8	KRX68330.1_T9	KRY17105.1_T12	TP06408_T4	KRZ79752.1_T10	KRZ19414.1_T11
3865	EFV57458_T1	KRZ60215.1_T2	KRY60920.1_T3	KRX50827.1_T5	KRX82632.1_T6	KRX25566.1_T7	KRZ96287.1_T8	KRX68157.1_T9	KRY17110.1_T12	TP06409_T4	KRZ79740.1_T10	KRZ19350.1_T11
3866	EFV57461_T1	KRZ60227.1_T2	KRY61039.1_T3	KRX50752.1_T5	KRX82692.1_T6	KRX25552.1_T7	KRZ96364.1_T8	KRX68306.1_T9	KRY17108.1_T12	TP06411_T4	KRZ71964.1_T10	KRZ19330.1_T11
3867	EFV57465_T1	KRZ60232.1_T2	KRY60987.1_T3	KRX50824.1_T5	KRX82699.1_T6	KRX25647.1_T7	KRZ96301.1_T8	KRX68298.1_T9	KRY17093.1_T12	TP06414_T4	KRZ71953.1_T10	KRZ19248.1_T11
3868	EFV57468_T1	KRZ60222.1_T2	KRY61054.1_T3	KRX50760.1_T5	KRX82721.1_T6	KRX25525.1_T7	KRZ96377.1_T8	KRX68272.1_T9	KRY17094.1_T12	TP06417_T4	KRZ71966.1_T10	KRZ19030.1_T11
3869	EFV57469_T1	KRZ60219.1_T2	KRY61015.1_T3	KRX50786.1_T5	KRX82723.1_T6	KRX25591.1_T7	KRZ96265.1_T8	KRX68362.1_T9	KRY17101.1_T12	TP06418_T4	KRZ71913.1_T10	KRZ19190.1_T11
3870	EFV57471_T1	KRZ60216.1_T2	KRY60911.1_T3	KRX50809.1_T5	KRX82682.1_T6	KRX25558.1_T7	KRZ96213.1_T8	KRX68222.1_T9	KRY16306.1_T12	TP06425_T4	KRZ71926.1_T10	KRZ19152.1_T11
3871	EFV57475_T1	KRZ60242.1_T2	KRY60883.1_T3	KRX50789.1_T5	KRX82691.1_T6	KRX25599.1_T7	KRZ96401.1_T8	KRX68297.1_T9	KRY16342.1_T12	TP06431_T4	KRZ71911.1_T10	KRZ19097.1_T11
3872	EFV57479_T1	KRZ60245.1_T2	KRY60873.1_T3	KRX50764.1_T5	KRX82693.1_T6	KRX25567.1_T7	KRZ96308.1_T8	KRX68393.1_T9	KRY16315.1_T12	TP06433_T4	KRZ71914.1_T10	KRZ19182.1_T11
3873	EFV57480_T1	KRZ60226.1_T2	KRY60963.1_T3	KRX50828.1_T5	KRX82676.1_T6	KRX25629.1_T7	KRZ96203.1_T8	KRX68486.1_T9	KRY16327.1_T12	TP06434_T4	KRZ71922.1_T10	KRZ19421.1_T11
3874	EFV57481_T1	KRZ60206.1_T2	KRY60972.1_T3	KRX50867.1_T5	KRX82657.1_T6	KRX25513.1_T7	KRZ96224.1_T8	KRX68322.1_T9	KRY16289.1_T12	TP06435_T4	KRZ71968.1_T10	KRZ19344.1_T11
3875	EFV57487_T1	KRZ50729.1_T2	KRY60868.1_T3	KRX50778.1_T5	KRX82703.1_T6	KRX25705.1_T7	KRZ96342.1_T8	KRX68366.1_T9	KRY17080.1_T12	TP06384_T4	KRZ80896.1_T10	KRZ19252.1_T11
3876	EFV57488_T1	KRZ50715.1_T2	KRY61052.1_T3	KRX50874.1_T5	KRX82663.1_T6	KRX25512.1_T7	KRZ96299.1_T8	KRX68428.1_T9	KRY17107.1_T12	TP06385_T4	KRZ80779.1_T10	KRZ19199.1_T11
3877	EFV57490_T1	KRZ50722.1_T2	KRY60945.1_T3	KRX50823.1_T5	KRX82630.1_T6	KRX25640.1_T7	KRZ96280.1_T8	KRX68400.1_T9	KRY17098.1_T12	TP06387_T4	KRZ80982.1_T10	KRZ19251.1_T11
3878	EFV57498_T1	KRZ61878.1_T2	KRY60899.1_T3	KRX48774.1_T5	KRX85533.1_T6	KRX27667.1_T7	KRZ92885.1_T8	KRX64836.1_T9	KRY19667.1_T12	TP06324_T4	KRZ80866.1_T10	KRZ19422.1_T11
3879	EFV57502_T1	KRZ61867.1_T2	KRY61062.1_T3	KRX48822.1_T5	KRX85744.1_T6	KRX27641.1_T7	KRZ92947.1_T8	KRX64728.1_T9	KRY19659.1_T12	TP06327_T4	KRZ80784.1_T10	KRZ19062.1_T11
3880	EFV57504_T1	KRZ61879.1_T2	KRY60902.1_T3	KRX48765.1_T5	KRX85743.1_T6	KRX27929.1_T7	KRZ92946.1_T8	KRX64720.1_T9	KRY19641.1_T12	TP06329_T4	KRZ80863.1_T10	KRZ19095.1_T11
3881	EFV57505_T1	KRZ61792.1_T2	KRY60986.1_T3	KRX48799.1_T5	KRX85716.1_T6	KRX27747.1_T7	KRZ92894.1_T8	KRX64802.1_T9	KRY19623.1_T12	TP06331_T4	KRZ80714.1_T10	KRZ19452.1_T11
3882	EFV57506_T1	KRZ61821.1_T2	KRY60961.1_T3	KRX48804.1_T5	KRX85788.1_T6	KRX27682.1_T7	KRZ92864.1_T8	KRX64864.1_T9	KRY19638.1_T12	TP06332_T4	KRZ80933.1_T10	KRZ19256.1_T11
3883	EFV57508_T1	KRZ61796.1_T2	KRY60925.1_T3	KRX48781.1_T5	KRX85508.1_T6	KRX27813.1_T7	KRZ92867.1_T8	KRX64764.1_T9	KRY19650.1_T12	TP06334_T4	KRZ80788.1_T10	KRZ19053.1_T11
3884	EFV57509_T1	KRZ61841.1_T2	KRY61016.1_T3	KRX48792.1_T5	KRX85605.1_T6	KRX27894.1_T7	KRZ92953.1_T8	KRX64815.1_T9	KRY19685.1_T12	TP06336_T4	KRZ81034.1_T10	KRZ19381.1_T11
3885	EFV57510_T1	KRZ61883.1_T2	KRY60998.1_T3	KRX48777.1_T5	KRX85737.1_T6	KRX27916.1_T7	KRZ92903.1_T8	KRX64808.1_T9	KRY19680.1_T12	TP06335_T4	KRZ80913.1_T10	KRZ19432.1_T11
3886	EFV57511_T1	KRZ61809.1_T2	KRY61065.1_T3	KRX48795.1_T5	KRX85687.1_T6	KRX27654.1_T7	KRZ92879.1_T8	KRX64859.1_T9	KRY19625.1_T12	TP06338_T4	KRZ81040.1_T10	KRZ19269.1_T11
3887	EFV57519_T1	KRZ61854.1_T2	KRY60955.1_T3	KRX48770.1_T5	KRX85519.1_T6	KRX27854.1_T7	KRZ92882.1_T8	KRX64799.1_T9	KRY19691.1_T12	TP06346_T4	KRZ80931.1_T10	KRZ19215.1_T11
3888	EFV57521_T1	KRZ61845.1_T2	KRY60915.1_T3	KRX48809.1_T5	KRX85636.1_T6	KRX27926.1_T7	KRZ92939.1_T8	KRX64803.1_T9	KRY19615.1_T12	TP06348_T4	KRZ80699.1_T10	KRZ19435.1_T11
3889	EFV57522_T1	KRZ61881.1_T2	KRY61022.1_T3	KRX48803.1_T5	KRX85603.1_T6	KRX27924.1_T7	KRZ92850.1_T8	KRX64761.1_T9	KRY19639.1_T12	TP06350_T4	KRZ80973.1_T10	KRZ19222.1_T11
3890	EFV57523_T1	KRZ61848.1_T2	KRY60959.1_T3	KRX48811.1_T5	KRX85648.1_T6	KRX27798.1_T7	KRZ92852.1_T8	KRX64885.1_T9	KRY19678.1_T12	TP06351_T4	KRZ80860.1_T10	KRZ19022.1_T11
3891	EFV57529_T1	KRZ61875.1_T2	KRY60893.1_T3	KRX48780.1_T5	KRX85664.1_T6	KRX27917.1_T7	KRZ92838.1_T8	KRX64839.1_T9	KRY19673.1_T12	TP06355_T4	KRZ81024.1_T10	KRZ19285.1_T11
3892	EFV57535_T1	KRZ61846.1_T2	KRY60869.1_T3	KRX48772.1_T5	KRX85780.1_T6	KRX27818.1_T7	KRZ92958.1_T8	KRX64783.1_T9	KRY19631.1_T12	TP06360_T4	KRZ81001.1_T10	KRZ19307.1_T11
3893	EFV57539_T1	KRZ61822.1_T2	KRY61047.1_T3	KRX48815.1_T5	KRX85684.1_T6	KRX27903.1_T7	KRZ92926.1_T8	KRX64774.1_T9	KRY19620.1_T12	TP06362_T4	KRZ80967.1_T10	KRZ19186.1_T11
3894	EFV57541_T1	KRZ61816.1_T2	KRY60891.1_T3	KRX48767.1_T5	KRX85536.1_T6	KRX27650.1_T7	KRZ92858.1_T8	KRX64874.1_T9	KRY19656.1_T12	TP06366_T4	KRZ80949.1_T10	KRZ19191.1_T11
3895	EFV57543_T1	KRZ49997.1_T2	KRY60983.1_T3	KRX50745.1_T5	KRX85690.1_T6	KRX27906.1_T7	KRZ92918.1_T8	KRX52846.1_T9	KRY19643.1_T12	TP06368_T4	KRZ81007.1_T10	KRZ19025.1_T11
3896	EFV57546_T1	KRZ49995.1_T2	KRY61029.1_T3	KRX50860.1_T5	KRX85619.1_T6	KRX27750.1_T7	KRZ92829.1_T8	KRX52864.1_T9	KRY19648.1_T12	TP06375_T4	KRZ80732.1_T10	KRZ19144.1_T11
3897	EFV57547_T1	KRZ50006.1_T2	KRY60926.1_T3	KRX50840.1_T5	KRX85541.1_T6	KRX27850.1_T7	KRZ92862.1_T8	KRX52851.1_T9	KRY19636.1_T12	TP06376_T4	KRZ80742.1_T10	KRZ19177.1_T11
3898	EFV57550_T1	KRZ49994.1_T2	KRY60991.1_T3	KRX50782.1_T5	KRX85732.1_T6	KRX27703.1_T7	KRZ92848.1_T8	KRX52856.1_T9	KRY19626.1_T12	TP06377_T4	KRZ81005.1_T10	KRZ19278.1_T11
3899	EFV57552_T1	KRZ49999.1_T2	KRY60977.1_T3	KRX50850.1_T5	KRX85632.1_T6	KRX27934.1_T7	KRZ92853.1_T8	KRX52853.1_T9	KRY19652.1_T12	TP06378_T4	KRZ80853.1_T10	KRZ19300.1_T11
3900	EFV57562_T1	KRZ58487.1_T2	KRY56644.1_T3	KRX48887.1_T5	KRX85764.1_T6	KRX27788.1_T7	KRZ88746.1_T8	KRX64965.1_T9	KRY17574.1_T12	TP06302_T4	KRZ80986.1_T10	KRZ19402.1_T11
3901	EFV57563_T1	KRZ58498.1_T2	KRY56686.1_T3	KRX48845.1_T5	KRX85583.1_T6	KRX27726.1_T7	KRZ88769.1_T8	KRX64925.1_T9	KRY17619.1_T12	TP06303_T4	KRZ80721.1_T10	KRZ19193.1_T11
3902	EFV57564_T1	KRZ58497.1_T2	KRY56696.1_T3	KRX48875.1_T5	KRX85688.1_T6	KRX27824.1_T7	KRZ88741.1_T8	KRX64980.1_T9	KRY17572.1_T12	TP06304_T4	KRZ80780.1_T10	KRZ19070.1_T11
3903	EFV57565_T1	KRZ58519.1_T2	KRY56688.1_T3	KRX48886.1_T5	KRX85506.1_T6	KRX27746.1_T7	KRZ88743.1_T8	KRX64904.1_T9	KRY17576.1_T12	TP06305_T4	KRZ81036.1_T10	KRZ19265.1_T11
3904	EFV57566_T1	KRZ58482.1_T2	KRY56662.1_T3	KRX48841.1_T5	KRX85754.1_T6	KRX27744.1_T7	KRZ88778.1_T8	KRX64942.1_T9	KRY17610.1_T12	TP06306_T4	KRZ81048.1_T10	KRZ19085.1_T11
3905	EFV57567_T1	KRZ58502.1_T2	KRY56646.1_T3	KRX48864.1_T5	KRX85476.1_T6	KRX27930.1_T7	KRZ88747.1_T8	KRX64898.1_T9	KRY17627.1_T12	TP06308_T4	KRZ80978.1_T10	KRZ19200.1_T11
3906	EFV57568_T1	KRZ58488.1_T2	KRY56720.1_T3	KRX48888.1_T5	KRX85535.1_T6	KRX27764.1_T7	KRZ88732.1_T8	KRX64964.1_T9	KRY17582.1_T12	TP06309_T4	KRZ80970.1_T10	KRZ19242.1_T11
3907	EFV57569_T1	KRZ58532.1_T2	KRY56658.1_T3	KRX48869.1_T5	KRX85596.1_T6	KRX27793.1_T7	KRZ88760.1_T8	KRX64929.1_T9	KRY17620.1_T12	TP06310_T4	KRZ80736.1_T10	KRZ19187.1_T11
3908	EFV57570_T1	KRZ58477.1_T2	KRY56716.1_T3	KRX48870.1_T5	KRX85514.1_T6	KRX27687.1_T7	KRZ88748.1_T8	KRX64982.1_T9	KRY17617.1_T12	TP06312_T4	KRZ80841.1_T10	KRZ19203.1_T11
3909	EFV57571_T1	KRZ58522.1_T2	KRY56671.1_T3	KRX48901.1_T5	KRX85750.1_T6	KRX27796.1_T7	KRZ88756.1_T8	KRX64897.1_T9	KRY17577.1_T12	TP06313_T4	KRZ80930.1_T10	KRZ19340.1_T11
3910	EFV57575_T1	KRZ58525.1_T2	KRY56668.1_T3	KRX48882.1_T5	KRX85722.1_T6	KRX27628.1_T7	KRZ88734.1_T8	KRX64951.1_T9	KRY17575.1_T12	TP06316_T4	KRZ80845.1_T10	KRZ19359.1_T11
3911	EFV57579_T1	KRZ58511.1_T2	KRY56677.1_T3	KRX48842.1_T5	KRX85714.1_T6	KRX27706.1_T7	KRZ88789.1_T8	KRX64963.1_T9	KRY17573.1_T12	TP06317_T4	KRZ81031.1_T10	KRZ19102.1_T11
3912	EFV57580_T1	KRZ58491.1_T2	KRY56650.1_T3	KRX48843.1_T5	KRX85626.1_T6	KRX27684.1_T7	KRZ88764.1_T8	KRX64971.1_T9	KRY17569.1_T12	TP06318_T4	KRZ80823.1_T10	KRZ19133.1_T11
3913	EFV57584_T1	KRZ58533.1_T2	KRY56687.1_T3	KRX48891.1_T5	KRX85512.1_T6	KRX27866.1_T7	KRZ88753.1_T8	KRX64981.1_T9	KRY17636.1_T12	TP06274_T4	KRZ80757.1_T10	KRZ19362.1_T11
3914	EFV57585_T1	KRZ58489.1_T2	KRY56703.1_T3	KRX48861.1_T5	KRX85643.1_T6	KRX27661.1_T7	KRZ88768.1_T8	KRX64926.1_T9	KRY17594.1_T12	TP06277_T4	KRZ80670.1_T10	KRZ19301.1_T11
3915	EFV57589_T1	KRZ58505.1_T2	KRY56713.1_T3	KRX48885.1_T5	KRX85601.1_T6	KRX27742.1_T7	KRZ88781.1_T8	KRX64938.1_T9	KRY17598.1_T12	TP06280_T4	KRZ80673.1_T10	KRZ19370.1_T11
3916	EFV57598_T1	KRZ58510.1_T2	KRY56681.1_T3	KRX48866.1_T5	KRX85757.1_T6	KRX27773.1_T7	KRZ88787.1_T8	KRX64957.1_T9	KRY17625.1_T12	TP06286_T4	KRZ80677.1_T10	KRZ19368.1_T11
3917	EFV57601_T1	KRZ58521.1_T2	KRY56680.1_T3	KRX48881.1_T5	KRX85777.1_T6	KRX27662.1_T7	KRZ88737.1_T8	KRX64924.1_T9	KRY17611.1_T12	TP06289_T4	KRZ80791.1_T10	KRZ19132.1_T11
3918	EFV57602_T1	KRZ58531.1_T2	KRY56710.1_T3	KRX48896.1_T5	KRX85695.1_T6	KRX27886.1_T7	KRZ88745.1_T8	KRX64948.1_T9	KRY17615.1_T12	TP06290_T4	KRZ80682.1_T10	KRZ19148.1_T11
3919	EFV57619_T1	KRZ61592.1_T2	KRY60601.1_T3	KRX48965.1_T5	KRX78111.1_T6	KRX27690.1_T7	KRZ98078.1_T8	KRX61996.1_T9	KRY07347.1_T12	TP02930_T4	KRZ80950.1_T10	KRZ19380.1_T11
3920	EFV57629_T1	KRZ61595.1_T2	KRY60613.1_T3	KRX48944.1_T5	KRX78113.1_T6	KRX27681.1_T7	KRZ98205.1_T8	KRX62072.1_T9	KRY18645.1_T12	TP02941_T4	KRZ80828.1_T10	KRZ19387.1_T11
3921	EFV57630_T1	KRZ61495.1_T2	KRY60583.1_T3	KRX48937.1_T5	KRX78145.1_T6	KRX27888.1_T7	KRZ98045.1_T8	KRX62039.1_T9	KRY18681.1_T12	TP02940_T4	KRZ80871.1_T10	KRZ19451.1_T11
3922	EFV57631_T1	KRZ61563.1_T2	KRY60620.1_T3	KRX48923.1_T5	KRX78133.1_T6	KRX27675.1_T7	KRZ97957.1_T8	KRX62005.1_T9	KRY18630.1_T12	TP02939_T4	KRZ80674.1_T10	KRZ19444.1_T11
3923	EFV57635_T1	KRZ61522.1_T2	KRY60536.1_T3	KRX48956.1_T5	KRX78162.1_T6	KRX27637.1_T7	KRZ98003.1_T8	KRX61979.1_T9	KRY18639.1_T12	TP02934_T4	KRZ80892.1_T10	KRZ19032.1_T11
3924	EFV57636_T1	KRZ61571.1_T2	KRY60619.1_T3	KRX48967.1_T5	KRX78117.1_T6	KRX27716.1_T7	KRZ98135.1_T8	KRX62001.1_T9	KRY18619.1_T12	TP02933_T4	KRZ81032.1_T10	KRZ19138.1_T11
3925	EFV57649_T1	KRZ61864.1_T2	KRY60547.1_T3	KRX48924.1_T5	KRX71693.1_T6	KRX27663.1_T7	KRZ88537.1_T8	KRX62047.1_T9	KRY11599.1_T12	TP09436_T4	KRZ80307.1_T10	KRZ17573.1_T11
3926	EFV57651_T1	KRZ61831.1_T2	KRY60529.1_T3	KRX48962.1_T5	KRX71691.1_T6	KRX27768.1_T7	KRZ88572.1_T8	KRX62003.1_T9	KRY11596.1_T12	TP09439_T4	KRZ80166.1_T10	KRZ17572.1_T11
3927	EFV57664_T1	KRZ61489.1_T2	KRY60568.1_T3	KRX48958.1_T5	KRX78127.1_T6	KRX27754.1_T7	KRZ97886.1_T8	KRX62062.1_T9	KRY18621.1_T12	TP09453_T4	KRZ80356.1_T10	KRZ17482.1_T11
3928	EFV57665_T1	KRZ61519.1_T2	KRY60616.1_T3	KRX48955.1_T5	KRX78110.1_T6	KRX27837.1_T7	KRZ97948.1_T8	KRX62045.1_T9	KRY18657.1_T12	TP09454_T4	KRZ80353.1_T10	KRZ17502.1_T11
3929	EFV57674_T1	KRZ61819.1_T2	KRY60627.1_T3	KRX48946.1_T5	KRX71692.1_T6	KRX15147.1_T7	KRZ88530.1_T8	KRX62043.1_T9	KRY08144.1_T12	TP09430_T4	KRZ65980.1_T10	KRZ01942.1_T11
3930	EFV57681_T1	KRZ49569.1_T2	KRY47141.1_T3	KRX37133.1_T5	KRX85510.1_T6	KRX14197.1_T7	KRZ93401.1_T8	KRX64694.1_T9	KRY14334.1_T12	TP09411_T4	KRZ67348.1_T10	KRZ03525.1_T11
3931	EFV57691_T1	KRZ49568.1_T2	KRY47156.1_T3	KRX37130.1_T5	KRX85607.1_T6	KRX14183.1_T7	KRZ93399.1_T8	KRX64693.1_T9	KRY14328.1_T12	TP09418_T4	KRZ67339.1_T10	KRZ03524.1_T11
3932	EFV57693_T1	KRZ49100.1_T2	KRY47444.1_T3	KRX35594.1_T5	KRX85591.1_T6	KRX14194.1_T7	KRZ89581.1_T8	KRX52243.1_T9	KRY08605.1_T12	TP09421_T4	KRZ67354.1_T10	KRZ03508.1_T11
3933	EFV57694_T1	KRZ49093.1_T2	KRY47427.1_T3	KRX35589.1_T5	KRX85692.1_T6	KRX14202.1_T7	KRZ89593.1_T8	KRX52247.1_T9	KRY08603.1_T12	TP09424_T4	KRZ67356.1_T10	KRZ03502.1_T11
3934	EFV57695_T1	KRZ49097.1_T2	KRY47426.1_T3	KRX35590.1_T5	KRX85673.1_T6	KRX14185.1_T7	KRZ89631.1_T8	KRX52246.1_T9	KRY08608.1_T12	TP09425_T4	KRZ67358.1_T10	KRZ03506.1_T11
3935	EFV57696_T1	KRZ49090.1_T2	KRY47443.1_T3	KRX35588.1_T5	KRX85706.1_T6	KRX14200.1_T7	KRZ89590.1_T8	KRX52244.1_T9	KRY08601.1_T12	TP09426_T4	KRZ67355.1_T10	KRZ03495.1_T11
3936	EFV57710_T1	KRZ54673.1_T2	KRY57183.1_T3	KRX47518.1_T5	KRX75636.1_T6	KRX14781.1_T7	KRZ87312.1_T8	KRX56238.1_T9	KRY23280.1_T12	TP04314_T4	KRZ68903.1_T10	KRZ07091.1_T11
3937	EFV57716_T1	KRZ54666.1_T2	KRY57186.1_T3	KRX47462.1_T5	KRX75628.1_T6	KRX27194.1_T7	KRZ87299.1_T8	KRX56241.1_T9	KRY23323.1_T12	TP04325_T4	KRZ74756.1_T10	KRZ07121.1_T11
3938	EFV57721_T1	KRZ54669.1_T2	KRY57214.1_T3	KRX47472.1_T5	KRX75626.1_T6	KRX27153.1_T7	KRZ87339.1_T8	KRX56231.1_T9	KRY23348.1_T12	TP04321_T4	KRZ74765.1_T10	KRZ07129.1_T11
3939	EFV57730_T1	KRZ54695.1_T2	KRY57196.1_T3	KRX36393.1_T5	KRX75631.1_T6	KRX17692.1_T7	KRZ97613.1_T8	KRX56233.1_T9	KRY23297.1_T12	TP04335_T4	KRZ74770.1_T10	KRZ14876.1_T11
3940	EFV57734_T1	KRZ54671.1_T2	KRY57203.1_T3	KRX36386.1_T5	KRX75635.1_T6	KRX17667.1_T7	KRZ97683.1_T8	KRX56236.1_T9	KRY23318.1_T12	TP04333_T4	KRZ74718.1_T10	KRZ14869.1_T11
3943	EFV57776_T1	KRZ61001.1_T2	KRY57163.1_T3	KRX48995.1_T5	KRX75934.1_T6	KRX17648.1_T7	KRZ97712.1_T8	KRX68582.1_T9	KRY23351.1_T12	TP04366_T4	KRZ79815.1_T10	KRZ14940.1_T11
3944	EFV57782_T1	KRZ61006.1_T2	KRY57193.1_T3	KRX49003.1_T5	KRX75961.1_T6	KRX17674.1_T7	KRZ97599.1_T8	KRX68699.1_T9	KRY23232.1_T12	TP04360_T4	KRZ79726.1_T10	KRZ14850.1_T11
3945	EFV57785_T1	KRZ60935.1_T2	KRY57160.1_T3	KRX49045.1_T5	KRX75958.1_T6	KRX17658.1_T7	KRZ97593.1_T8	KRX68908.1_T9	KRY23354.1_T12	TP04357_T4	KRZ79765.1_T10	KRZ14874.1_T11
3946	EFV57786_T1	KRZ60987.1_T2	KRY57226.1_T3	KRX49025.1_T5	KRX75957.1_T6	KRX17679.1_T7	KRZ97704.1_T8	KRX68606.1_T9	KRY23329.1_T12	TP04355_T4	KRZ79737.1_T10	KRZ14890.1_T11
3947	EFV57794_T1	KRZ60962.1_T2	KRY57171.1_T3	KRX49008.1_T5	KRX75953.1_T6	KRX17684.1_T7	KRZ97670.1_T8	KRX68932.1_T9	KRY23287.1_T12	TP04350_T4	KRZ79827.1_T10	KRZ14943.1_T11
3948	EFV57801_T1	KRZ61366.1_T2	KRY57433.1_T3	KRX50246.1_T5	KRX85711.1_T6	KRX25862.1_T7	KRZ97618.1_T8	KRX68960.1_T9	KRY23293.1_T12	TP04393_T4	KRZ79050.1_T10	KRZ14879.1_T11
3949	EFV57803_T1	KRZ61324.1_T2	KRY57490.1_T3	KRX50237.1_T5	KRX85595.1_T6	KRX25800.1_T7	KRZ97811.1_T8	KRX68755.1_T9	KRY23294.1_T12	TP04391_T4	KRZ77697.1_T10	KRZ14916.1_T11
3950	EFV57806_T1	KRZ61378.1_T2	KRY57412.1_T3	KRX50209.1_T5	KRX85728.1_T6	KRX25773.1_T7	KRZ97847.1_T8	KRX68603.1_T9	KRY23284.1_T12	TP04389_T4	KRZ77785.1_T10	KRZ14945.1_T11
3951	EFV57809_T1	KRZ61363.1_T2	KRY57471.1_T3	KRX50189.1_T5	KRX85538.1_T6	KRX25917.1_T7	KRZ97757.1_T8	KRX68836.1_T9	KRY23279.1_T12	TP04384_T4	KRZ77658.1_T10	KRZ14903.1_T11
3952	EFV57813_T1	KRZ61320.1_T2	KRY57445.1_T3	KRX50264.1_T5	KRX85485.1_T6	KRX25803.1_T7	KRZ97614.1_T8	KRX68553.1_T9	KRY23260.1_T12	TP04385_T4	KRZ77764.1_T10	KRZ14922.1_T11
3953	EFV57816_T1	KRZ61342.1_T2	KRY57428.1_T3	KRX49065.1_T5	KRX85503.1_T6	KRX25778.1_T7	KRZ97553.1_T8	KRX69014.1_T9	KRY23330.1_T12	TP04383_T4	KRZ77701.1_T10	KRZ14900.1_T11
3954	EFV57819_T1	KRZ61323.1_T2	KRY57409.1_T3	KRX49023.1_T5	KRX85771.1_T6	KRX25890.1_T7	KRZ97665.1_T8	KRX68631.1_T9	KRY23358.1_T12	TP04382_T4	KRZ77744.1_T10	KRZ14856.1_T11
3955	EFV57821_T1	KRZ61371.1_T2	KRY57482.1_T3	KRX49022.1_T5	KRX85663.1_T6	KRX25808.1_T7	KRZ97639.1_T8	KRX68929.1_T9	KRY23345.1_T12	TP04379_T4	KRZ77664.1_T10	KRZ14908.1_T11
3956	EFV57822_T1	KRZ61332.1_T2	KRY57463.1_T3	KRX49012.1_T5	KRX85656.1_T6	KRX25744.1_T7	KRZ97790.1_T8	KRX68586.1_T9	KRY23307.1_T12	TP04377_T4	KRZ77633.1_T10	KRZ14839.1_T11
3957	EFV57823_T1	KRZ61382.1_T2	KRY57446.1_T3	KRX49007.1_T5	KRX85488.1_T6	KRX25790.1_T7	KRZ97684.1_T8	KRX68931.1_T9	KRY23362.1_T12	TP04376_T4	KRZ77769.1_T10	KRZ14818.1_T11
3958	EFV57825_T1	KRZ61391.1_T2	KRY57447.1_T3	KRX49036.1_T5	KRX85742.1_T6	KRX25843.1_T7	KRZ97616.1_T8	KRX68826.1_T9	KRY23247.1_T12	TP04373_T4	KRZ77734.1_T10	KRZ14880.1_T11
3960	EFV57829_T1	KRZ61372.1_T2	KRY57437.1_T3	KRX49060.1_T5	KRX85625.1_T6	KRX25861.1_T7	KRZ97808.1_T8	KRX68969.1_T9	KRY23364.1_T12	TP04371_T4	KRZ77648.1_T10	KRZ14912.1_T11
3961	EFV57848_T1	KRZ61328.1_T2	KRY57455.1_T3	KRX50262.1_T5	KRX85544.1_T6	KRX25780.1_T7	KRZ97594.1_T8	KRX68827.1_T9	KRY23257.1_T12	TP04413_T4	KRZ79079.1_T10	KRZ09980.1_T11
3962	EFV57851_T1	KRZ61375.1_T2	KRY57424.1_T3	KRX50259.1_T5	KRX85557.1_T6	KRX25832.1_T7	KRZ97823.1_T8	KRX68693.1_T9	KRY23339.1_T12	TP04409_T4	KRZ79096.1_T10	KRZ09957.1_T11
3963	EFV57852_T1	KRZ61376.1_T2	KRY57442.1_T3	KRX50182.1_T5	KRX85478.1_T6	KRX25722.1_T7	KRZ97686.1_T8	KRX68805.1_T9	KRY23340.1_T12	TP04408_T4	KRZ79101.1_T10	KRZ10017.1_T11
3964	EFV57853_T1	KRZ61345.1_T2	KRY57444.1_T3	KRX50194.1_T5	KRX85772.1_T6	KRX25798.1_T7	KRZ97577.1_T8	KRX68807.1_T9	KRY23356.1_T12	TP04407_T4	KRZ79026.1_T10	KRZ09960.1_T11
3965	EFV57854_T1	KRZ61325.1_T2	KRY57489.1_T3	KRX50269.1_T5	KRX85708.1_T6	KRX25810.1_T7	KRZ97582.1_T8	KRX68893.1_T9	KRY23289.1_T12	TP04406_T4	KRZ79188.1_T10	KRZ10015.1_T11
3966	EFV57855_T1	KRZ61311.1_T2	KRY57449.1_T3	KRX50252.1_T5	KRX85646.1_T6	KRX25774.1_T7	KRZ97596.1_T8	KRX69028.1_T9	KRY23282.1_T12	TP04405_T4	KRZ79157.1_T10	KRZ09982.1_T11
3967	EFV57858_T1	KRZ61359.1_T2	KRY57483.1_T3	KRX50280.1_T5	KRX85547.1_T6	KRX25915.1_T7	KRZ97549.1_T8	KRX68729.1_T9	KRY23241.1_T12	TP04402_T4	KRZ79137.1_T10	KRZ09989.1_T11
3968	EFV57862_T1	KRZ61313.1_T2	KRY57407.1_T3	KRX50215.1_T5	KRX85622.1_T6	KRX25735.1_T7	KRZ97727.1_T8	KRX68913.1_T9	KRY23263.1_T12	TP04399_T4	KRZ79022.1_T10	KRZ14893.1_T11
3969	EFV57867_T1	KRZ55714.1_T2	KRY58796.1_T3	KRX47716.1_T5	KRX76253.1_T6	KRX25895.1_T7	KRZ96242.1_T8	KRX62591.1_T9	KRY24007.1_T12	TP04467_T4	KRZ79056.1_T10	KRZ18598.1_T11
3970	EFV57870_T1	KRZ59597.1_T2	KRY58785.1_T3	KRX47685.1_T5	KRX76239.1_T6	KRX25909.1_T7	KRZ96368.1_T8	KRX62513.1_T9	KRY23822.1_T12	TP04461_T4	KRZ78998.1_T10	KRZ18641.1_T11
3971	EFV57872_T1	KRZ59563.1_T2	KRY58745.1_T3	KRX47690.1_T5	KRX76260.1_T6	KRX25737.1_T7	KRZ96275.1_T8	KRX62491.1_T9	KRY23943.1_T12	TP04458_T4	KRZ79126.1_T10	KRZ18777.1_T11
3972	EFV57875_T1	KRZ59601.1_T2	KRY58728.1_T3	KRX47676.1_T5	KRX76243.1_T6	KRX25791.1_T7	KRZ96319.1_T8	KRX62519.1_T9	KRY23827.1_T12	TP04455_T4	KRZ79132.1_T10	KRZ18809.1_T11
3973	EFV57878_T1	KRZ59565.1_T2	KRY58752.1_T3	KRX47724.1_T5	KRX77096.1_T6	KRX25756.1_T7	KRZ96307.1_T8	KRX62534.1_T9	KRY23920.1_T12	TP04454_T4	KRZ78994.1_T10	KRZ18707.1_T11
3974	EFV57879_T1	KRZ59553.1_T2	KRY58725.1_T3	KRX47736.1_T5	KRX77143.1_T6	KRX25881.1_T7	KRZ96305.1_T8	KRX62516.1_T9	KRY23887.1_T12	TP04453_T4	KRZ79162.1_T10	KRZ18864.1_T11
3975	EFV57889_T1	KRZ59559.1_T2	KRY58830.1_T3	KRX50266.1_T5	KRX77120.1_T6	KRX25747.1_T7	KRZ96335.1_T8	KRX62544.1_T9	KRY23994.1_T12	TP04443_T4	KRZ79158.1_T10	KRZ10008.1_T11
3976	EFV57893_T1	KRZ59557.1_T2	KRY58762.1_T3	KRX50166.1_T5	KRX77101.1_T6	KRX25893.1_T7	KRZ96391.1_T8	KRX62510.1_T9	KRY23955.1_T12	TP04438_T4	KRZ79100.1_T10	KRZ10020.1_T11
3977	EFV57896_T1	KRZ59550.1_T2	KRY58814.1_T3	KRX50231.1_T5	KRX77121.1_T6	KRX25806.1_T7	KRZ96210.1_T8	KRX62489.1_T9	KRY23928.1_T12	TP04435_T4	KRZ79007.1_T10	KRZ09977.1_T11
3978	EFV57898_T1	KRZ59605.1_T2	KRY58817.1_T3	KRX50256.1_T5	KRX77152.1_T6	KRX25863.1_T7	KRZ96331.1_T8	KRX62483.1_T9	KRY23906.1_T12	TP04434_T4	KRZ79010.1_T10	KRZ10003.1_T11
3979	EFV57902_T1	KRZ59580.1_T2	KRY58818.1_T3	KRX50191.1_T5	KRX77091.1_T6	KRX25754.1_T7	KRZ96248.1_T8	KRX62584.1_T9	KRY23983.1_T12	TP04429_T4	KRZ78990.1_T10	KRZ10026.1_T11
3980	EFV57903_T1	KRZ59595.1_T2	KRY58784.1_T3	KRX50192.1_T5	KRX77129.1_T6	KRX25865.1_T7	KRZ96264.1_T8	KRX62475.1_T9	KRY23783.1_T12	TP04428_T4	KRZ79077.1_T10	KRZ09978.1_T11
3981	EFV57905_T1	KRZ59588.1_T2	KRY58801.1_T3	KRX50248.1_T5	KRX77116.1_T6	KRX25788.1_T7	KRZ96297.1_T8	KRX62556.1_T9	KRY23907.1_T12	TP04426_T4	KRZ79076.1_T10	KRZ09971.1_T11
3982	EFV57910_T1	KRZ55733.1_T2	KRY58811.1_T3	KRX47675.1_T5	KRX69536.1_T6	KRX25822.1_T7	KRZ96398.1_T8	KRX62541.1_T9	KRY23858.1_T12	TP07792_T4	KRZ70626.1_T10	KRZ06527.1_T11
3983	EFV57913_T1	KRZ55731.1_T2	KRY58809.1_T3	KRX47662.1_T5	KRX76240.1_T6	KRX25728.1_T7	KRZ96272.1_T8	KRX62493.1_T9	KRY23976.1_T12	TP07796_T4	KRZ70609.1_T10	KRZ06503.1_T11
3984	EFV57922_T1	KRZ55690.1_T2	KRY58748.1_T3	KRX47722.1_T5	KRX76248.1_T6	KRX25892.1_T7	KRZ96202.1_T8	KRX62524.1_T9	KRY23995.1_T12	TP04479_T4	KRZ79138.1_T10	KRZ18604.1_T11
3985	EFV57923_T1	KRZ55689.1_T2	KRY58821.1_T3	KRX47674.1_T5	KRX76257.1_T6	KRX25732.1_T7	KRZ96226.1_T8	KRX62582.1_T9	KRY23969.1_T12	TP04478_T4	KRZ79164.1_T10	KRZ18647.1_T11
3986	EFV57937_T1	KRZ58408.1_T2	KRY56251.1_T3	KRX37890.1_T5	KRX70662.1_T6	KRX26671.1_T7	KRZ95765.1_T8	KRX67032.1_T9	KRY22916.1_T12	TP07775_T4	KRZ80571.1_T10	KRZ05653.1_T11
3987	EFV57941_T1	KRZ58441.1_T2	KRY56227.1_T3	KRX37877.1_T5	KRX70661.1_T6	KRX26661.1_T7	KRZ95911.1_T8	KRX67018.1_T9	KRY22936.1_T12	TP07778_T4	KRZ80520.1_T10	KRZ05675.1_T11
3988	EFV57942_T1	KRZ58431.1_T2	KRY56278.1_T3	KRX37882.1_T5	KRX70654.1_T6	KRX26760.1_T7	KRZ95940.1_T8	KRX67137.1_T9	KRY22929.1_T12	TP07780_T4	KRZ80494.1_T10	KRZ05655.1_T11
3989	EFV57943_T1	KRZ58411.1_T2	KRY56237.1_T3	KRX37889.1_T5	KRX70655.1_T6	KRX26687.1_T7	KRZ95839.1_T8	KRX67102.1_T9	KRY22979.1_T12	TP07781_T4	KRZ80558.1_T10	KRZ05651.1_T11
3990	EFV57951_T1	KRZ55700.1_T2	KRY46820.1_T3	KRX35981.1_T5	KRX76764.1_T6	KRX25847.1_T7	KRZ88976.1_T8	KRX51998.1_T9	KRY14424.1_T12	TP07787_T4	KRZ70588.1_T10	KRZ06550.1_T11
3991	EFV57957_T1	KRZ57866.1_T2	KRY52995.1_T3	KRX34919.1_T5	KRX76581.1_T6	KRX26594.1_T7	KRZ88398.1_T8	KRX58637.1_T9	KRY09436.1_T12	TP07706_T4	KRZ80438.1_T10	KRZ17571.1_T11
3992	EFV57958_T1	KRZ57878.1_T2	KRY53007.1_T3	KRX34917.1_T5	KRX76586.1_T6	KRX26781.1_T7	KRZ88410.1_T8	KRX58646.1_T9	KRY09431.1_T12	TP07707_T4	KRZ80465.1_T10	KRZ17542.1_T11
3993	EFV57959_T1	KRZ57879.1_T2	KRY53024.1_T3	KRX34920.1_T5	KRX76579.1_T6	KRX26622.1_T7	KRZ88418.1_T8	KRX58612.1_T9	KRY09426.1_T12	TP07708_T4	KRZ80388.1_T10	KRZ17489.1_T11
3994	EFV57962_T1	KRZ57856.1_T2	KRY53036.1_T3	KRX39632.1_T5	KRX76543.1_T6	KRX26711.1_T7	KRZ98082.1_T8	KRX58618.1_T9	KRY22959.1_T12	TP07710_T4	KRZ80451.1_T10	KRZ17559.1_T11
3995	EFV57964_T1	KRZ57891.1_T2	KRY53023.1_T3	KRX39620.1_T5	KRX76566.1_T6	KRX26639.1_T7	KRZ98145.1_T8	KRX58597.1_T9	KRY22840.1_T12	TP07709_T4	KRZ80527.1_T10	KRZ17621.1_T11
3996	EFV57972_T1	KRZ57854.1_T2	KRY52999.1_T3	KRX39625.1_T5	KRX76562.1_T6	KRX16457.1_T7	KRZ98168.1_T8	KRX58623.1_T9	KRY22983.1_T12	TP07717_T4	KRZ80407.1_T10	KRZ17497.1_T11
3998	EFV57975_T1	KRZ57836.1_T2	KRY52987.1_T3	KRX39624.1_T5	KRX76571.1_T6	KRX16417.1_T7	KRZ98160.1_T8	KRX58624.1_T9	KRY22860.1_T12	TP07722_T4	KRZ80627.1_T10	KRZ17596.1_T11
3999	EFV57976_T1	KRZ57840.1_T2	KRY52996.1_T3	KRX39633.1_T5	KRX76580.1_T6	KRX16433.1_T7	KRZ98008.1_T8	KRX58591.1_T9	KRY22963.1_T12	TP07723_T4	KRZ80509.1_T10	KRZ17657.1_T11
4000	EFV57978_T1	KRZ57871.1_T2	KRY53001.1_T3	KRX39612.1_T5	KRX76565.1_T6	KRX16410.1_T7	KRZ97900.1_T8	KRX58645.1_T9	KRY22995.1_T12	TP07725_T4	KRZ80656.1_T10	KRZ07146.1_T11
4001	EFV57979_T1	KRZ57859.1_T2	KRY53037.1_T3	KRX39623.1_T5	KRX76587.1_T6	KRX16447.1_T7	KRZ97895.1_T8	KRX58621.1_T9	KRY22990.1_T12	TP07726_T4	KRZ80578.1_T10	KRZ07110.1_T11
4002	EFV57980_T1	KRZ57887.1_T2	KRY53006.1_T3	KRX40956.1_T5	KRX76594.1_T6	KRX16414.1_T7	KRZ98087.1_T8	KRX58653.1_T9	KRY22907.1_T12	TP07728_T4	KRZ80540.1_T10	KRZ07092.1_T11
4003	EFV57985_T1	KRZ57888.1_T2	KRY53030.1_T3	KRX40976.1_T5	KRX76561.1_T6	KRX16438.1_T7	KRZ98176.1_T8	KRX58595.1_T9	KRY22912.1_T12	TP07734_T4	KRZ80609.1_T10	KRZ07088.1_T11
4004	EFV57986_T1	KRZ57869.1_T2	KRY53033.1_T3	KRX40974.1_T5	KRX76569.1_T6	KRX16423.1_T7	KRZ98154.1_T8	KRX58600.1_T9	KRY22950.1_T12	TP07735_T4	KRZ80462.1_T10	KRZ07138.1_T11
4005	EFV57988_T1	KRZ57848.1_T2	KRY53039.1_T3	KRX40960.1_T5	KRX76563.1_T6	KRX16416.1_T7	KRZ98084.1_T8	KRX58611.1_T9	KRY22920.1_T12	TP07736_T4	KRZ80514.1_T10	KRZ07156.1_T11
4007	EFV57998_T1	KRZ57838.1_T2	KRY46324.1_T3	KRX40953.1_T5	KRX72756.1_T6	KRX16471.1_T7	KRZ95873.1_T8	KRX58614.1_T9	KRY22858.1_T12	TP07744_T4	KRZ80625.1_T10	KRZ11122.1_T11
4008	EFV58000_T1	KRZ57895.1_T2	KRY46331.1_T3	KRX40961.1_T5	KRX72719.1_T6	KRX16453.1_T7	KRZ95871.1_T8	KRX58640.1_T9	KRY22901.1_T12	TP07746_T4	KRZ80546.1_T10	KRZ11126.1_T11
4009	EFV58002_T1	KRZ57858.1_T2	KRY46335.1_T3	KRX40949.1_T5	KRX72753.1_T6	KRX16418.1_T7	KRZ95950.1_T8	KRX58598.1_T9	KRY22955.1_T12	TP07748_T4	KRZ80592.1_T10	KRZ11172.1_T11
4010	EFV58003_T1	KRZ57841.1_T2	KRY46323.1_T3	KRX40966.1_T5	KRX72760.1_T6	KRX16470.1_T7	KRZ95959.1_T8	KRX58599.1_T9	KRY22900.1_T12	TP07750_T4	KRZ80531.1_T10	KRZ11181.1_T11
4011	EFV58004_T1	KRZ57865.1_T2	KRY46337.1_T3	KRX40968.1_T5	KRX72743.1_T6	KRX16424.1_T7	KRZ95808.1_T8	KRX58626.1_T9	KRY22897.1_T12	TP07752_T4	KRZ80445.1_T10	KRZ11137.1_T11
4012	EFV58005_T1	KRZ57867.1_T2	KRY46319.1_T3	KRX40970.1_T5	KRX72747.1_T6	KRX16420.1_T7	KRZ95826.1_T8	KRX58649.1_T9	KRY22922.1_T12	TP07753_T4	KRZ80416.1_T10	KRZ11196.1_T11
4013	EFV58007_T1	KRZ50250.1_T2	KRY56244.1_T3	KRX36811.1_T5	KRX75421.1_T6	KRX26607.1_T7	KRZ95931.1_T8	KRX56708.1_T9	KRY22960.1_T12	TP07754_T4	KRZ80485.1_T10	KRZ11156.1_T11
4014	EFV58008_T1	KRZ50257.1_T2	KRY56249.1_T3	KRX36810.1_T5	KRX75401.1_T6	KRX26701.1_T7	KRZ95863.1_T8	KRX56695.1_T9	KRY22973.1_T12	TP07755_T4	KRZ80487.1_T10	KRZ11182.1_T11
4015	EFV58014_T1	KRZ50270.1_T2	KRY56229.1_T3	KRX36817.1_T5	KRX75410.1_T6	KRX26668.1_T7	KRZ95806.1_T8	KRX56722.1_T9	KRY22938.1_T12	TP07761_T4	KRZ80475.1_T10	KRZ11148.1_T11
4016	EFV58015_T1	KRZ50267.1_T2	KRY56271.1_T3	KRX36814.1_T5	KRX75415.1_T6	KRX26632.1_T7	KRZ95941.1_T8	KRX56744.1_T9	KRY22953.1_T12	TP07762_T4	KRZ80506.1_T10	KRZ11185.1_T11
4017	EFV58019_T1	KRZ50272.1_T2	KRY56231.1_T3	KRX35347.1_T5	KRX75412.1_T6	KRX26775.1_T7	KRZ95796.1_T8	KRX53656.1_T9	KRY22855.1_T12	TP07764_T4	KRZ80499.1_T10	KRZ05666.1_T11
4018	EFV58022_T1	KRZ58418.1_T2	KRY56225.1_T3	KRX38004.1_T5	KRX75403.1_T6	KRX26666.1_T7	KRZ95884.1_T8	KRX67027.1_T9	KRY22881.1_T12	TP07769_T4	KRZ80619.1_T10	KRZ05672.1_T11
4019	EFV58025_T1	KRZ58404.1_T2	KRY56281.1_T3	KRX37999.1_T5	KRX75419.1_T6	KRX26679.1_T7	KRZ95824.1_T8	KRX67031.1_T9	KRY22893.1_T12	TP07770_T4	KRZ80626.1_T10	KRZ05662.1_T11
4020	EFV58029_T1	KRZ58430.1_T2	KRY56243.1_T3	KRX37996.1_T5	KRX75396.1_T6	KRX26778.1_T7	KRZ95751.1_T8	KRX67022.1_T9	KRY22838.1_T12	TP07773_T4	KRZ80521.1_T10	KRZ05669.1_T11
4022	EFV58038_T1	KRZ55198.1_T2	KRY51867.1_T3	KRX45088.1_T5	KRX81586.1_T6	KRX26721.1_T7	KRZ88419.1_T8	KRX56912.1_T9	KRY20755.1_T12	TP07482_T4	KRZ80615.1_T10	KRZ17616.1_T11
4023	EFV58041_T1	KRZ55192.1_T2	KRY51902.1_T3	KRX45103.1_T5	KRX81597.1_T6	KRX26723.1_T7	KRZ88440.1_T8	KRX56916.1_T9	KRY20785.1_T12	TP07483_T4	KRZ80396.1_T10	KRZ17475.1_T11
4024	EFV58042_T1	KRZ55224.1_T2	KRY51885.1_T3	KRX45097.1_T5	KRX81614.1_T6	KRX26609.1_T7	KRZ88411.1_T8	KRX56955.1_T9	KRY20798.1_T12	TP07484_T4	KRZ80602.1_T10	KRZ17511.1_T11
4025	EFV58043_T1	KRZ55230.1_T2	KRY51893.1_T3	KRX45087.1_T5	KRX81620.1_T6	KRX26641.1_T7	KRZ88390.1_T8	KRX56907.1_T9	KRY20762.1_T12	TP07485_T4	KRZ80550.1_T10	KRZ17552.1_T11
4026	EFV58046_T1	KRZ55218.1_T2	KRY51903.1_T3	KRX45093.1_T5	KRX81574.1_T6	KRX26648.1_T7	KRZ88376.1_T8	KRX56943.1_T9	KRY20801.1_T12	TP07491_T4	KRZ80440.1_T10	KRZ17660.1_T11
4027	EFV58050_T1	KRZ55194.1_T2	KRY51887.1_T3	KRX45072.1_T5	KRX81573.1_T6	KRX26604.1_T7	KRZ88373.1_T8	KRX56935.1_T9	KRY20794.1_T12	TP07494_T4	KRZ80611.1_T10	KRZ17473.1_T11
4028	EFV58053_T1	KRZ55202.1_T2	KRY51876.1_T3	KRX45092.1_T5	KRX81633.1_T6	KRX26624.1_T7	KRZ88394.1_T8	KRX56950.1_T9	KRY20739.1_T12	TP07497_T4	KRZ80484.1_T10	KRZ17484.1_T11
4029	EFV58054_T1	KRZ55200.1_T2	KRY51868.1_T3	KRX45095.1_T5	KRX81583.1_T6	KRX26720.1_T7	KRZ88422.1_T8	KRX56944.1_T9	KRY20752.1_T12	TP07498_T4	KRZ80435.1_T10	KRZ17601.1_T11
4030	EFV58056_T1	KRZ55227.1_T2	KRY51908.1_T3	KRX45091.1_T5	KRX81594.1_T6	KRX26662.1_T7	KRZ88408.1_T8	KRX56914.1_T9	KRY20782.1_T12	TP07499_T4	KRZ80404.1_T10	KRZ17624.1_T11
4031	EFV58057_T1	KRZ55220.1_T2	KRY51858.1_T3	KRX45062.1_T5	KRX81646.1_T6	KRX26643.1_T7	KRZ88425.1_T8	KRX56918.1_T9	KRY20781.1_T12	TP07500_T4	KRZ80500.1_T10	KRZ17608.1_T11
4032	EFV58065_T1	KRZ50083.1_T2	KRY50509.1_T3	KRX40810.1_T5	KRX72495.1_T6	KRX21508.1_T7	KRZ94677.1_T8	KRX54903.1_T9	KRY14855.1_T12	TP04707_T4	KRZ72509.1_T10	KRZ18922.1_T11
4033	EFV58071_T1	KRZ50066.1_T2	KRY50537.1_T3	KRX40835.1_T5	KRX72510.1_T6	KRX21429.1_T7	KRZ94576.1_T8	KRX54881.1_T9	KRY14867.1_T12	TP04713_T4	KRZ72549.1_T10	KRZ18770.1_T11
4034	EFV58072_T1	KRZ50080.1_T2	KRY50520.1_T3	KRX40832.1_T5	KRX72522.1_T6	KRX21418.1_T7	KRZ94564.1_T8	KRX54913.1_T9	KRY14849.1_T12	TP04714_T4	KRZ72571.1_T10	KRZ18941.1_T11
4035	EFV58079_T1	KRZ50063.1_T2	KRY50521.1_T3	KRX40800.1_T5	KRX72519.1_T6	KRX21412.1_T7	KRZ94701.1_T8	KRX54916.1_T9	KRY09163.1_T12	TP04720_T4	KRZ72507.1_T10	KRZ18916.1_T11
4036	EFV58086_T1	KRZ56700.1_T2	KRY53344.1_T3	KRX47350.1_T5	KRX81635.1_T6	KRX18209.1_T7	KRZ94695.1_T8	KRX68284.1_T9	KRY20799.1_T12	TP07438_T4	KRZ80434.1_T10	KRZ17626.1_T11
4037	EFV58088_T1	KRZ56665.1_T2	KRY53299.1_T3	KRX47328.1_T5	KRX81630.1_T6	KRX18183.1_T7	KRZ94659.1_T8	KRX68452.1_T9	KRY20744.1_T12	TP07439_T4	KRZ80498.1_T10	KRZ17582.1_T11
4038	EFV58089_T1	KRZ56698.1_T2	KRY53296.1_T3	KRX47303.1_T5	KRX81580.1_T6	KRX18190.1_T7	KRZ94569.1_T8	KRX68318.1_T9	KRY20702.1_T12	TP07440_T4	KRZ80412.1_T10	KRZ17614.1_T11
4039	EFV58091_T1	KRZ56707.1_T2	KRY53346.1_T3	KRX47354.1_T5	KRX81684.1_T6	KRX18235.1_T7	KRZ94630.1_T8	KRX68356.1_T9	KRY20721.1_T12	TP07442_T4	KRZ80648.1_T10	KRZ17577.1_T11
4040	EFV58093_T1	KRZ56682.1_T2	KRY53337.1_T3	KRX47323.1_T5	KRX81584.1_T6	KRX18212.1_T7	KRZ94556.1_T8	KRX68385.1_T9	KRY20749.1_T12	TP07444_T4	KRZ80544.1_T10	KRZ17485.1_T11
4041	EFV58094_T1	KRZ56711.1_T2	KRY53356.1_T3	KRX47334.1_T5	KRX81593.1_T6	KRX18175.1_T7	KRZ94651.1_T8	KRX68279.1_T9	KRY20792.1_T12	TP07446_T4	KRZ80623.1_T10	KRZ17538.1_T11
4042	EFV58095_T1	KRZ56703.1_T2	KRY53327.1_T3	KRX47313.1_T5	KRX81613.1_T6	KRX18244.1_T7	KRZ94619.1_T8	KRX68438.1_T9	KRY20748.1_T12	TP07447_T4	KRZ80442.1_T10	KRZ17533.1_T11
4043	EFV58097_T1	KRZ56685.1_T2	KRY53329.1_T3	KRX47366.1_T5	KRX81618.1_T6	KRX18245.1_T7	KRZ94587.1_T8	KRX68234.1_T9	KRY20826.1_T12	TP07449_T4	KRZ80497.1_T10	KRZ17575.1_T11
4044	EFV58101_T1	KRZ56662.1_T2	KRY53308.1_T3	KRX47359.1_T5	KRX81600.1_T6	KRX18217.1_T7	KRZ94560.1_T8	KRX68495.1_T9	KRY20773.1_T12	TP07451_T4	KRZ80486.1_T10	KRZ17678.1_T11
4045	EFV58102_T1	KRZ56671.1_T2	KRY53332.1_T3	KRX47304.1_T5	KRX81629.1_T6	KRX18181.1_T7	KRZ94627.1_T8	KRX68202.1_T9	KRY20777.1_T12	TP07452_T4	KRZ80600.1_T10	KRZ17531.1_T11
4046	EFV58103_T1	KRZ56677.1_T2	KRY53314.1_T3	KRX47347.1_T5	KRX81570.1_T6	KRX18236.1_T7	KRZ94674.1_T8	KRX68370.1_T9	KRY20757.1_T12	TP07453_T4	KRZ80593.1_T10	KRZ17548.1_T11
4047	EFV58107_T1	KRZ56694.1_T2	KRY53324.1_T3	KRX47362.1_T5	KRX81673.1_T6	KRX18241.1_T7	KRZ94698.1_T8	KRX68206.1_T9	KRY20731.1_T12	TP07456_T4	KRZ80390.1_T10	KRZ17557.1_T11
4048	EFV58109_T1	KRZ56704.1_T2	KRY53336.1_T3	KRX47357.1_T5	KRX81661.1_T6	KRX18218.1_T7	KRZ94563.1_T8	KRX68363.1_T9	KRY20819.1_T12	TP07458_T4	KRZ80641.1_T10	KRZ17610.1_T11
4049	EFV58116_T1	KRZ56674.1_T2	KRY53326.1_T3	KRX47346.1_T5	KRX81579.1_T6	KRX13493.1_T7	KRZ94719.1_T8	KRX68352.1_T9	KRY20787.1_T12	TP07464_T4	KRZ80562.1_T10	KRZ17650.1_T11
4050	EFV58117_T1	KRZ56713.1_T2	KRY53311.1_T3	KRX47348.1_T5	KRX81610.1_T6	KRX13501.1_T7	KRZ94574.1_T8	KRX68337.1_T9	KRY20812.1_T12	TP07465_T4	KRZ80419.1_T10	KRZ17536.1_T11
4051	EFV58119_T1	KRZ56680.1_T2	KRY53340.1_T3	KRX47365.1_T5	KRX81679.1_T6	KRX13482.1_T7	KRZ94666.1_T8	KRX68331.1_T9	KRY20817.1_T12	TP07469_T4	KRZ80584.1_T10	KRZ17470.1_T11
4052	EFV58123_T1	KRZ55208.1_T2	KRY51897.1_T3	KRX45078.1_T5	KRX81575.1_T6	KRX26690.1_T7	KRZ88384.1_T8	KRX56939.1_T9	KRY22948.1_T12	TP07471_T4	KRZ80553.1_T10	KRZ17597.1_T11
4053	EFV58132_T1	KRZ56031.1_T2	KRY52352.1_T3	KRX47769.1_T5	KRX78802.1_T6	KRX21477.1_T7	KRZ94566.1_T8	KRX63492.1_T9	KRY14844.1_T12	TP04685_T4	KRZ72540.1_T10	KRZ18621.1_T11
4054	EFV58133_T1	KRZ56035.1_T2	KRY52362.1_T3	KRX47750.1_T5	KRX78750.1_T6	KRX21403.1_T7	KRZ94665.1_T8	KRX63433.1_T9	KRY14872.1_T12	TP04686_T4	KRZ72515.1_T10	KRZ18832.1_T11
4055	EFV58137_T1	KRZ56044.1_T2	KRY52350.1_T3	KRX47781.1_T5	KRX78770.1_T6	KRX21390.1_T7	KRZ94648.1_T8	KRX63395.1_T9	KRY14850.1_T12	TP04691_T4	KRZ72548.1_T10	KRZ18827.1_T11
4056	EFV58142_T1	KRZ56047.1_T2	KRY52375.1_T3	KRX47791.1_T5	KRX78793.1_T6	KRX21384.1_T7	KRZ94609.1_T8	KRX63484.1_T9	KRY14868.1_T12	TP04696_T4	KRZ72514.1_T10	KRZ18722.1_T11
4057	EFV58144_T1	KRZ56061.1_T2	KRY52348.1_T3	KRX40287.1_T5	KRX77988.1_T6	KRX21422.1_T7	KRZ94684.1_T8	KRX63438.1_T9	KRY14854.1_T12	TP04698_T4	KRZ72572.1_T10	KRZ18745.1_T11
4059	EFV58146_T1	KRZ56058.1_T2	KRY50506.1_T3	KRX40793.1_T5	KRX72516.1_T6	KRX21486.1_T7	KRZ94639.1_T8	KRX54914.1_T9	KRY14865.1_T12	TP04701_T4	KRZ72533.1_T10	KRZ18808.1_T11
4060	EFV58149_T1	KRZ56037.1_T2	KRY50505.1_T3	KRX40796.1_T5	KRX72521.1_T6	KRX21494.1_T7	KRZ94655.1_T8	KRX54935.1_T9	KRY14860.1_T12	TP04704_T4	KRZ72551.1_T10	KRZ18717.1_T11
4061	EFV58156_T1	KRZ49219.1_T2	KRY52383.1_T3	KRX35354.1_T5	KRX78760.1_T6	KRX27094.1_T7	KRZ94697.1_T8	KRX52089.1_T9	KRY22607.1_T12	TP04671_T4	KRZ79842.1_T10	KRZ18702.1_T11
4062	EFV58158_T1	KRZ49228.1_T2	KRY52364.1_T3	KRX35351.1_T5	KRX78758.1_T6	KRX27144.1_T7	KRZ94654.1_T8	KRX52091.1_T9	KRY22589.1_T12	TP04673_T4	KRZ79699.1_T10	KRZ18659.1_T11
4063	EFV58159_T1	KRZ49222.1_T2	KRY52358.1_T3	KRX35350.1_T5	KRX78799.1_T6	KRX27196.1_T7	KRZ94675.1_T8	KRX52086.1_T9	KRY22565.1_T12	TP04674_T4	KRZ79893.1_T10	KRZ18744.1_T11
4064	EFV58160_T1	KRZ49217.1_T2	KRY52342.1_T3	KRX35352.1_T5	KRX78774.1_T6	KRX27108.1_T7	KRZ94711.1_T8	KRX52092.1_T9	KRY22610.1_T12	TP04675_T4	KRZ79807.1_T10	KRZ18573.1_T11
4065	EFV58163_T1	KRZ56038.1_T2	KRY52384.1_T3	KRX47759.1_T5	KRX78775.1_T6	KRX21465.1_T7	KRZ94687.1_T8	KRX63436.1_T9	KRY22616.1_T12	TP04676_T4	KRZ79862.1_T10	KRZ18679.1_T11
4066	EFV58169_T1	KRZ56036.1_T2	KRY52376.1_T3	KRX47773.1_T5	KRX78767.1_T6	KRX21513.1_T7	KRZ94710.1_T8	KRX63464.1_T9	KRY22553.1_T12	TP04679_T4	KRZ72562.1_T10	KRZ18910.1_T11
4067	EFV58171_T1	KRZ56062.1_T2	KRY52363.1_T3	KRX47797.1_T5	KRX78762.1_T6	KRX21516.1_T7	KRZ94625.1_T8	KRX63466.1_T9	KRY22562.1_T12	TP04680_T4	KRZ72570.1_T10	KRZ18590.1_T11
4068	EFV58173_T1	KRZ56045.1_T2	KRY52361.1_T3	KRX47796.1_T5	KRX78752.1_T6	KRX21498.1_T7	KRZ94673.1_T8	KRX63486.1_T9	KRY22584.1_T12	TP04682_T4	KRZ72530.1_T10	KRZ18746.1_T11
4069	EFV58175_T1	KRZ50780.1_T2	KRY48076.1_T3	KRX40309.1_T5	KRX75014.1_T6	KRX24427.1_T7	KRZ94626.1_T8	KRX54554.1_T9	KRY22661.1_T12	TP04662_T4	KRZ79747.1_T10	KRZ18734.1_T11
4070	EFV58176_T1	KRZ50770.1_T2	KRY48068.1_T3	KRX40293.1_T5	KRX75020.1_T6	KRX24471.1_T7	KRZ94670.1_T8	KRX54570.1_T9	KRY22653.1_T12	TP04664_T4	KRZ79650.1_T10	KRZ18935.1_T11
4071	EFV58177_T1	KRZ50783.1_T2	KRY48081.1_T3	KRX40292.1_T5	KRX75043.1_T6	KRX24571.1_T7	KRZ94657.1_T8	KRX54566.1_T9	KRY22612.1_T12	TP04665_T4	KRZ79771.1_T10	KRZ18726.1_T11
4072	EFV58181_T1	KRZ56183.1_T2	KRY54288.1_T3	KRX41978.1_T5	KRX79541.1_T6	KRX24522.1_T7	KRZ82752.1_T8	KRX58960.1_T9	KRY22636.1_T12	TP04636_T4	KRZ79837.1_T10	KRZ18813.1_T11
4073	EFV58182_T1	KRZ56152.1_T2	KRY54298.1_T3	KRX41963.1_T5	KRX79612.1_T6	KRX24451.1_T7	KRZ82740.1_T8	KRX58946.1_T9	KRY22563.1_T12	TP04637_T4	KRZ79812.1_T10	KRZ18826.1_T11
4074	EFV58183_T1	KRZ56179.1_T2	KRY54279.1_T3	KRX41971.1_T5	KRX79557.1_T6	KRX24498.1_T7	KRZ82746.1_T8	KRX58973.1_T9	KRY22611.1_T12	TP04639_T4	KRZ79733.1_T10	KRZ18578.1_T11
4075	EFV58185_T1	KRZ56194.1_T2	KRY54308.1_T3	KRX41970.1_T5	KRX79543.1_T6	KRX24545.1_T7	KRZ82747.1_T8	KRX58981.1_T9	KRY22602.1_T12	TP04641_T4	KRZ79864.1_T10	KRZ18634.1_T11
4076	EFV58186_T1	KRZ56155.1_T2	KRY54267.1_T3	KRX41959.1_T5	KRX79586.1_T6	KRX24446.1_T7	KRZ82749.1_T8	KRX58955.1_T9	KRY22547.1_T12	TP04643_T4	KRZ79806.1_T10	KRZ18584.1_T11
4078	EFV58194_T1	KRZ50781.1_T2	KRY48075.1_T3	KRX40290.1_T5	KRX75027.1_T6	KRX24566.1_T7	KRZ94561.1_T8	KRX54575.1_T9	KRY22680.1_T12	TP04654_T4	KRZ79764.1_T10	KRZ18886.1_T11
4079	EFV58197_T1	KRZ50779.1_T2	KRY48077.1_T3	KRX40296.1_T5	KRX75029.1_T6	KRX24542.1_T7	KRZ94594.1_T8	KRX54585.1_T9	KRY22574.1_T12	TP04657_T4	KRZ79698.1_T10	KRZ18701.1_T11
4080	EFV58198_T1	KRZ50769.1_T2	KRY48070.1_T3	KRX40302.1_T5	KRX75050.1_T6	KRX24448.1_T7	KRZ94706.1_T8	KRX54574.1_T9	KRY22671.1_T12	TP04658_T4	KRZ79839.1_T10	KRZ18654.1_T11
4081	EFV58199_T1	KRZ50789.1_T2	KRY48078.1_T3	KRX40295.1_T5	KRX75032.1_T6	KRX24561.1_T7	KRZ94624.1_T8	KRX54560.1_T9	KRY22630.1_T12	TP04660_T4	KRZ79896.1_T10	KRZ18804.1_T11
4082	EFV58204_T1	KRZ53189.1_T2	KRY54321.1_T3	KRX37338.1_T5	KRX79538.1_T6	KRX27169.1_T7	KRZ88644.1_T8	KRX59000.1_T9	KRY22685.1_T12	TP04612_T4	KRZ79647.1_T10	KRZ18853.1_T11
4083	EFV58211_T1	KRZ53188.1_T2	KRY54266.1_T3	KRX37352.1_T5	KRX79554.1_T6	KRX27232.1_T7	KRZ88664.1_T8	KRX58935.1_T9	KRY22635.1_T12	TP04614_T4	KRZ79695.1_T10	KRZ18784.1_T11
4084	EFV58213_T1	KRZ53198.1_T2	KRY54319.1_T3	KRX37342.1_T5	KRX79520.1_T6	KRX27264.1_T7	KRZ88585.1_T8	KRX59014.1_T9	KRY22540.1_T12	TP04616_T4	KRZ79798.1_T10	KRZ18767.1_T11
4085	EFV58214_T1	KRZ53201.1_T2	KRY54252.1_T3	KRX37360.1_T5	KRX79609.1_T6	KRX27224.1_T7	KRZ88650.1_T8	KRX58970.1_T9	KRY22594.1_T12	TP04618_T4	KRZ79655.1_T10	KRZ18643.1_T11
4086	EFV58215_T1	KRZ53207.1_T2	KRY54317.1_T3	KRX41989.1_T5	KRX79522.1_T6	KRX27202.1_T7	KRZ88592.1_T8	KRX58984.1_T9	KRY22677.1_T12	TP04620_T4	KRZ79713.1_T10	KRZ18931.1_T11
4087	EFV58216_T1	KRZ53211.1_T2	KRY54320.1_T3	KRX41961.1_T5	KRX79532.1_T6	KRX27149.1_T7	KRZ88663.1_T8	KRX58992.1_T9	KRY22684.1_T12	TP04621_T4	KRZ79895.1_T10	KRZ18829.1_T11
4088	EFV58218_T1	KRZ53203.1_T2	KRY54251.1_T3	KRX41969.1_T5	KRX79600.1_T6	KRX27316.1_T7	KRZ88583.1_T8	KRX58974.1_T9	KRY22526.1_T12	TP04622_T4	KRZ79833.1_T10	KRZ18699.1_T11
4089	EFV58225_T1	KRZ48741.1_T2	KRY54274.1_T3	KRX41991.1_T5	KRX79619.1_T6	KRX27263.1_T7	KRZ88596.1_T8	KRX58999.1_T9	KRY22533.1_T12	TP04631_T4	KRZ79811.1_T10	KRZ18695.1_T11
4091	EFV58230_T1	KRZ54315.1_T2	KRY54272.1_T3	KRX41183.1_T5	KRX79571.1_T6	KRX15654.1_T7	KRZ84053.1_T8	KRX58976.1_T9	KRY22541.1_T12	TP04603_T4	KRZ79734.1_T10	KRZ18572.1_T11
4092	EFV58231_T1	KRZ54317.1_T2	KRY54264.1_T3	KRX41190.1_T5	KRX79536.1_T6	KRX15652.1_T7	KRZ84059.1_T8	KRX58997.1_T9	KRY22617.1_T12	TP04604_T4	KRZ79795.1_T10	KRZ18883.1_T11
4093	EFV58233_T1	KRZ54273.1_T2	KRY54289.1_T3	KRX41200.1_T5	KRX79574.1_T6	KRX15671.1_T7	KRZ84069.1_T8	KRX58933.1_T9	KRY22626.1_T12	TP04605_T4	KRZ79860.1_T10	KRZ18642.1_T11
4094	EFV58235_T1	KRZ53208.1_T2	KRY54309.1_T3	KRX37354.1_T5	KRX79527.1_T6	KRX27310.1_T7	KRZ88597.1_T8	KRX58939.1_T9	KRY22538.1_T12	TP04607_T4	KRZ79789.1_T10	KRZ18579.1_T11
4095	EFV58236_T1	KRZ53200.1_T2	KRY54262.1_T3	KRX37359.1_T5	KRX79604.1_T6	KRX27104.1_T7	KRZ88657.1_T8	KRX58971.1_T9	KRY22527.1_T12	TP04608_T4	KRZ79731.1_T10	KRZ18656.1_T11
4096	EFV58242_T1	KRZ61179.1_T2	KRY60091.1_T3	KRX49357.1_T5	KRX84556.1_T6	KRX23798.1_T7	KRZ97644.1_T8	KRX68324.1_T9	KRY21992.1_T12	TP04543_T4	KRZ79718.1_T10	KRZ18898.1_T11
4097	EFV58243_T1	KRZ61167.1_T2	KRY59998.1_T3	KRX49385.1_T5	KRX84674.1_T6	KRX23877.1_T7	KRZ97637.1_T8	KRX68432.1_T9	KRY22045.1_T12	TP04544_T4	KRZ79849.1_T10	KRZ18766.1_T11
4098	EFV58246_T1	KRZ61188.1_T2	KRY59967.1_T3	KRX49336.1_T5	KRX84576.1_T6	KRX23920.1_T7	KRZ97723.1_T8	KRX68159.1_T9	KRY21977.1_T12	TP04545_T4	KRZ79881.1_T10	KRZ18811.1_T11
4099	EFV58247_T1	KRZ61126.1_T2	KRY59970.1_T3	KRX49342.1_T5	KRX84705.1_T6	KRX23893.1_T7	KRZ97776.1_T8	KRX68285.1_T9	KRY21950.1_T12	TP04546_T4	KRZ79750.1_T10	KRZ18633.1_T11
4100	EFV58249_T1	KRZ61147.1_T2	KRY60047.1_T3	KRX49388.1_T5	KRX84709.1_T6	KRX23818.1_T7	KRZ97589.1_T8	KRX68281.1_T9	KRY21999.1_T12	TP04548_T4	KRZ79661.1_T10	KRZ18591.1_T11
4101	EFV58254_T1	KRZ61198.1_T2	KRY60069.1_T3	KRX49398.1_T5	KRX84620.1_T6	KRX23856.1_T7	KRZ97739.1_T8	KRX68350.1_T9	KRY22072.1_T12	TP04551_T4	KRZ79890.1_T10	KRZ18606.1_T11
4102	EFV58258_T1	KRZ61193.1_T2	KRY60031.1_T3	KRX49369.1_T5	KRX84611.1_T6	KRX23793.1_T7	KRZ97579.1_T8	KRX68423.1_T9	KRY21980.1_T12	TP04556_T4	KRZ79788.1_T10	KRZ18599.1_T11
4103	EFV58260_T1	KRZ61149.1_T2	KRY60113.1_T3	KRX49331.1_T5	KRX84604.1_T6	KRX23845.1_T7	KRZ97749.1_T8	KRX68347.1_T9	KRY22012.1_T12	TP04557_T4	KRZ79728.1_T10	KRZ18907.1_T11
4104	EFV58263_T1	KRZ61152.1_T2	KRY60106.1_T3	KRX49396.1_T5	KRX84655.1_T6	KRX23779.1_T7	KRZ97543.1_T8	KRX68133.1_T9	KRY22028.1_T12	TP04561_T4	KRZ79710.1_T10	KRZ18658.1_T11
4105	EFV58264_T1	KRZ61187.1_T2	KRY60078.1_T3	KRX49366.1_T5	KRX84560.1_T6	KRX23866.1_T7	KRZ97753.1_T8	KRX68503.1_T9	KRY22091.1_T12	TP04562_T4	KRZ79801.1_T10	KRZ18738.1_T11
4106	EFV58265_T1	KRZ61128.1_T2	KRY60048.1_T3	KRX49379.1_T5	KRX84553.1_T6	KRX23864.1_T7	KRZ97818.1_T8	KRX68326.1_T9	KRY22001.1_T12	TP04563_T4	KRZ79810.1_T10	KRZ18577.1_T11
4107	EFV58270_T1	KRZ61209.1_T2	KRY60102.1_T3	KRX49338.1_T5	KRX84571.1_T6	KRX23891.1_T7	KRZ97653.1_T8	KRX68487.1_T9	KRY22036.1_T12	TP04570_T4	KRZ79829.1_T10	KRZ18851.1_T11
4108	EFV58271_T1	KRZ61122.1_T2	KRY59976.1_T3	KRX49324.1_T5	KRX84668.1_T6	KRX23844.1_T7	KRZ97554.1_T8	KRX68410.1_T9	KRY21990.1_T12	TP04571_T4	KRZ79671.1_T10	KRZ18616.1_T11
4109	EFV58272_T1	KRZ61195.1_T2	KRY59959.1_T3	KRX49381.1_T5	KRX84683.1_T6	KRX23895.1_T7	KRZ97735.1_T8	KRX68397.1_T9	KRY21945.1_T12	TP04572_T4	KRZ79639.1_T10	KRZ18676.1_T11
4110	EFV58274_T1	KRZ61204.1_T2	KRY60067.1_T3	KRX49367.1_T5	KRX84701.1_T6	KRX23934.1_T7	KRZ97652.1_T8	KRX68483.1_T9	KRY21968.1_T12	TP04573_T4	KRZ79758.1_T10	KRZ18637.1_T11
4111	EFV58275_T1	KRZ61140.1_T2	KRY60002.1_T3	KRX49384.1_T5	KRX84559.1_T6	KRX23886.1_T7	KRZ97789.1_T8	KRX68412.1_T9	KRY22003.1_T12	TP04574_T4	KRZ79644.1_T10	KRZ18752.1_T11
4112	EFV58282_T1	KRZ54301.1_T2	KRY60093.1_T3	KRX34647.1_T5	KRX85700.1_T6	KRX23843.1_T7	KRZ97748.1_T8	KRX68473.1_T9	KRY21998.1_T12	TP04582_T4	KRZ79691.1_T10	KRZ18904.1_T11
4113	EFV58289_T1	KRZ54265.1_T2	KRY60084.1_T3	KRX41169.1_T5	KRX79620.1_T6	KRX13369.1_T7	KRZ84076.1_T8	KRX68485.1_T9	KRY22065.1_T12	TP04585_T4	KRZ79866.1_T10	KRZ18732.1_T11
4114	EFV58291_T1	KRZ54292.1_T2	KRY60005.1_T3	KRX41214.1_T5	KRX79577.1_T6	KRX13355.1_T7	KRZ84080.1_T8	KRX68236.1_T9	KRY22048.1_T12	TP04592_T4	KRZ79738.1_T10	KRZ18861.1_T11
4115	EFV58292_T1	KRZ54321.1_T2	KRY60081.1_T3	KRX41193.1_T5	KRX79599.1_T6	KRX13366.1_T7	KRZ84050.1_T8	KRX68300.1_T9	KRY22022.1_T12	TP04593_T4	KRZ79692.1_T10	KRZ18664.1_T11
4116	EFV58293_T1	KRZ54263.1_T2	KRY60136.1_T3	KRX41170.1_T5	KRX79610.1_T6	KRX13360.1_T7	KRZ84074.1_T8	KRX68244.1_T9	KRY22019.1_T12	TP04596_T4	KRZ79716.1_T10	KRZ18772.1_T11
4117	EFV58299_T1	KRZ61177.1_T2	KRY59993.1_T3	KRX49404.1_T5	KRX84634.1_T6	KRX19268.1_T7	KRZ97724.1_T8	KRX68212.1_T9	KRY21956.1_T12	TP04516_T4	KRZ79166.1_T10	KRZ18860.1_T11
4118	EFV58301_T1	KRZ61214.1_T2	KRY60135.1_T3	KRX49402.1_T5	KRX84688.1_T6	KRX19228.1_T7	KRZ97755.1_T8	KRX68447.1_T9	KRY22014.1_T12	TP04521_T4	KRZ79094.1_T10	KRZ18812.1_T11
4119	EFV58302_T1	KRZ61133.1_T2	KRY60034.1_T3	KRX49360.1_T5	KRX84614.1_T6	KRX19248.1_T7	KRZ97574.1_T8	KRX68181.1_T9	KRY21952.1_T12	TP04525_T4	KRZ79112.1_T10	KRZ18593.1_T11
4120	EFV58305_T1	KRZ61163.1_T2	KRY60111.1_T3	KRX49389.1_T5	KRX84637.1_T6	KRX23824.1_T7	KRZ97767.1_T8	KRX68188.1_T9	KRY22082.1_T12	TP04528_T4	KRZ79147.1_T10	KRZ18837.1_T11
4121	EFV58306_T1	KRZ61181.1_T2	KRY59987.1_T3	KRX49359.1_T5	KRX84629.1_T6	KRX23884.1_T7	KRZ97850.1_T8	KRX68450.1_T9	KRY22056.1_T12	TP04529_T4	KRZ79123.1_T10	KRZ18938.1_T11
4122	EFV58307_T1	KRZ61213.1_T2	KRY59989.1_T3	KRX49348.1_T5	KRX84580.1_T6	KRX23889.1_T7	KRZ97547.1_T8	KRX68402.1_T9	KRY22080.1_T12	TP04531_T4	KRZ79025.1_T10	KRZ18718.1_T11
4123	EFV58312_T1	KRZ61123.1_T2	KRY60051.1_T3	KRX49325.1_T5	KRX84591.1_T6	KRX23910.1_T7	KRZ97782.1_T8	KRX68225.1_T9	KRY21995.1_T12	TP04535_T4	KRZ79828.1_T10	KRZ18850.1_T11
4124	EFV58313_T1	KRZ61176.1_T2	KRY60124.1_T3	KRX49344.1_T5	KRX84704.1_T6	KRX23916.1_T7	KRZ97540.1_T8	KRX68232.1_T9	KRY22086.1_T12	TP04537_T4	KRZ79775.1_T10	KRZ18917.1_T11
4125	EFV58314_T1	KRZ61137.1_T2	KRY59963.1_T3	KRX49380.1_T5	KRX84657.1_T6	KRX23923.1_T7	KRZ97560.1_T8	KRX68415.1_T9	KRY22025.1_T12	TP04540_T4	KRZ79867.1_T10	KRZ18620.1_T11
4126	EFV58316_T1	KRZ50713.1_T2	KRY51161.1_T3	KRX40256.1_T5	KRX70443.1_T6	KRX22726.1_T7	KRZ83674.1_T8	KRX68506.1_T9	KRY16131.1_T12	TP07813_T4	KRZ70568.1_T10	KRZ06545.1_T11
4127	EFV58317_T1	KRZ50693.1_T2	KRY51151.1_T3	KRX40276.1_T5	KRX70434.1_T6	KRX22800.1_T7	KRZ83682.1_T8	KRX68197.1_T9	KRY16135.1_T12	TP07811_T4	KRZ70580.1_T10	KRZ06501.1_T11
4128	EFV58319_T1	KRZ50708.1_T2	KRY51169.1_T3	KRX40278.1_T5	KRX70426.1_T6	KRX22701.1_T7	KRZ83665.1_T8	KRX68439.1_T9	KRY16149.1_T12	TP07809_T4	KRZ70598.1_T10	KRZ06553.1_T11
4129	EFV58323_T1	KRZ50701.1_T2	KRY51146.1_T3	KRX40268.1_T5	KRX70440.1_T6	KRX22735.1_T7	KRZ83664.1_T8	KRX68323.1_T9	KRY16125.1_T12	TP07804_T4	KRZ70586.1_T10	KRZ06551.1_T11
4130	EFV58327_T1	KRZ49260.1_T2	KRY60076.1_T3	KRX36352.1_T5	KRX84606.1_T6	KRX25438.1_T7	KRZ85657.1_T8	KRX68342.1_T9	KRY21944.1_T12	TP04484_T4	KRZ79058.1_T10	KRZ18693.1_T11
4131	EFV58334_T1	KRZ50206.1_T2	KRY59974.1_T3	KRX37491.1_T5	KRX84643.1_T6	KRX25316.1_T7	KRZ85644.1_T8	KRX68368.1_T9	KRY22029.1_T12	TP04489_T4	KRZ79130.1_T10	KRZ18740.1_T11
4132	EFV58335_T1	KRZ50212.1_T2	KRY59991.1_T3	KRX37503.1_T5	KRX84710.1_T6	KRX25303.1_T7	KRZ85673.1_T8	KRX68249.1_T9	KRY21989.1_T12	TP04490_T4	KRZ79047.1_T10	KRZ18755.1_T11
4133	EFV58336_T1	KRZ50204.1_T2	KRY60109.1_T3	KRX37496.1_T5	KRX84667.1_T6	KRX25341.1_T7	KRZ85665.1_T8	KRX68282.1_T9	KRY22081.1_T12	TP04492_T4	KRZ79155.1_T10	KRZ18612.1_T11
4134	EFV58342_T1	KRZ50197.1_T2	KRY59985.1_T3	KRX37497.1_T5	KRX84666.1_T6	KRX25333.1_T7	KRZ85666.1_T8	KRX68139.1_T9	KRY22063.1_T12	TP04499_T4	KRZ79168.1_T10	KRZ18670.1_T11
4135	EFV58345_T1	KRZ50203.1_T2	KRY59953.1_T3	KRX37501.1_T5	KRX84682.1_T6	KRX25482.1_T7	KRZ85678.1_T8	KRX68245.1_T9	KRY22021.1_T12	TP04505_T4	KRZ79190.1_T10	KRZ18872.1_T11
4136	EFV58346_T1	KRZ50214.1_T2	KRY59981.1_T3	KRX37490.1_T5	KRX84589.1_T6	KRX25423.1_T7	KRZ85649.1_T8	KRX68409.1_T9	KRY21953.1_T12	TP04506_T4	KRZ79023.1_T10	KRZ18618.1_T11
4137	EFV58347_T1	KRZ50201.1_T2	KRY60027.1_T3	KRX33875.1_T5	KRX84662.1_T6	KRX25382.1_T7	KRZ85652.1_T8	KRX68141.1_T9	KRY21960.1_T12	TP04507_T4	KRZ79003.1_T10	KRZ18819.1_T11
4138	EFV58349_T1	KRZ60945.1_T2	KRY60046.1_T3	KRX35578.1_T5	KRX84563.1_T6	KRX25424.1_T7	KRZ85645.1_T8	KRX68237.1_T9	KRY22060.1_T12	TP04509_T4	KRZ79040.1_T10	KRZ18697.1_T11
4139	EFV58350_T1	KRZ61008.1_T2	KRY59955.1_T3	KRX35585.1_T5	KRX84616.1_T6	KRX25490.1_T7	KRZ85656.1_T8	KRX68383.1_T9	KRY21996.1_T12	TP04510_T4	KRZ79009.1_T10	KRZ18894.1_T11
4140	EFV58351_T1	KRZ60936.1_T2	KRY60042.1_T3	KRX35576.1_T5	KRX84681.1_T6	KRX25447.1_T7	KRZ85664.1_T8	KRX68302.1_T9	KRY22093.1_T12	TP04511_T4	KRZ79167.1_T10	KRZ18936.1_T11
4141	EFV58353_T1	KRZ60992.1_T2	KRY60116.1_T3	KRX35577.1_T5	KRX84670.1_T6	KRX25307.1_T7	KRZ85669.1_T8	KRX68339.1_T9	KRY22035.1_T12	TP04513_T4	KRZ79043.1_T10	KRZ18610.1_T11
4142	EFV58354_T1	KRZ60981.1_T2	KRY60030.1_T3	KRX35582.1_T5	KRX84568.1_T6	KRX25464.1_T7	KRZ85655.1_T8	KRX68437.1_T9	KRY21978.1_T12	TP04514_T4	KRZ79012.1_T10	KRZ18653.1_T11
4144	EFV58359_T1	KRZ58630.1_T2	KRY45752.1_T3	KRX40179.1_T5	KRX78417.1_T6	KRX22757.1_T7	KRZ83315.1_T8	KRX60361.1_T9	KRY15380.1_T12	TP07855_T4	KRZ78709.1_T10	KRZ16861.1_T11
4145	EFV58360_T1	KRZ58668.1_T2	KRY45768.1_T3	KRX40158.1_T5	KRX78414.1_T6	KRX22717.1_T7	KRZ83322.1_T8	KRX60389.1_T9	KRY15355.1_T12	TP07854_T4	KRZ78669.1_T10	KRZ16815.1_T11
4146	EFV58361_T1	KRZ58681.1_T2	KRY45754.1_T3	KRX40189.1_T5	KRX78419.1_T6	KRX22826.1_T7	KRZ83324.1_T8	KRX60350.1_T9	KRY15359.1_T12	TP07853_T4	KRZ78691.1_T10	KRZ16910.1_T11
4147	EFV58367_T1	KRZ58675.1_T2	KRY47215.1_T3	KRX40168.1_T5	KRX78386.1_T6	KRX22796.1_T7	KRZ96650.1_T8	KRX60396.1_T9	KRY15363.1_T12	TP07850_T4	KRZ78710.1_T10	KRZ16843.1_T11
4148	EFV58368_T1	KRZ58678.1_T2	KRY47212.1_T3	KRX40178.1_T5	KRX78392.1_T6	KRX22805.1_T7	KRZ96660.1_T8	KRX60402.1_T9	KRY15378.1_T12	TP07849_T4	KRZ78698.1_T10	KRZ16832.1_T11
4149	EFV58369_T1	KRZ58615.1_T2	KRY47202.1_T3	KRX40154.1_T5	KRX78443.1_T6	KRX22824.1_T7	KRZ96839.1_T8	KRX60369.1_T9	KRY15362.1_T12	TP07843_T4	KRZ78572.1_T10	KRZ16921.1_T11
4150	EFV58370_T1	KRZ58663.1_T2	KRY47204.1_T3	KRX40180.1_T5	KRX78439.1_T6	KRX22730.1_T7	KRZ96854.1_T8	KRX60355.1_T9	KRY15372.1_T12	TP07847_T4	KRZ78701.1_T10	KRZ16800.1_T11
4151	EFV58376_T1	KRZ58607.1_T2	KRY47213.1_T3	KRX40172.1_T5	KRX78412.1_T6	KRX22815.1_T7	KRZ96769.1_T8	KRX60406.1_T9	KRY15365.1_T12	TP07845_T4	KRZ78706.1_T10	KRZ16821.1_T11
4153	EFV58393_T1	KRZ48990.1_T2	KRY51758.1_T3	KRX38455.1_T5	KRX69625.1_T6	KRX22689.1_T7	KRZ85734.1_T8	KRX60391.1_T9	KRY12845.1_T12	TP07875_T4	KRZ78621.1_T10	KRZ16902.1_T11
4154	EFV58394_T1	KRZ48996.1_T2	KRY51773.1_T3	KRX38461.1_T5	KRX69623.1_T6	KRX22814.1_T7	KRZ85741.1_T8	KRX60344.1_T9	KRY12848.1_T12	TP07874_T4	KRZ78666.1_T10	KRZ16759.1_T11
4155	EFV58398_T1	KRZ58647.1_T2	KRY51766.1_T3	KRX40262.1_T5	KRX78369.1_T6	KRX22697.1_T7	KRZ85767.1_T8	KRX60382.1_T9	KRY15370.1_T12	TP07865_T4	KRZ78632.1_T10	KRZ16830.1_T11
4156	EFV58399_T1	KRZ58638.1_T2	KRY51771.1_T3	KRX40251.1_T5	KRX78387.1_T6	KRX22756.1_T7	KRZ85729.1_T8	KRX60412.1_T9	KRY15394.1_T12	TP07864_T4	KRZ78636.1_T10	KRZ16881.1_T11
4157	EFV58401_T1	KRZ58649.1_T2	KRY51755.1_T3	KRX40279.1_T5	KRX78427.1_T6	KRX22836.1_T7	KRZ85731.1_T8	KRX60373.1_T9	KRY15373.1_T12	TP07862_T4	KRZ78714.1_T10	KRZ16763.1_T11
4158	EFV58402_T1	KRZ58657.1_T2	KRY51763.1_T3	KRX40261.1_T5	KRX78432.1_T6	KRX22692.1_T7	KRZ85746.1_T8	KRX60384.1_T9	KRY15406.1_T12	TP07861_T4	KRZ78614.1_T10	KRZ16771.1_T11
4159	EFV58405_T1	KRZ57142.1_T2	KRY60382.1_T3	KRX41783.1_T5	KRX83266.1_T6	KRX22807.1_T7	KRZ88008.1_T8	KRX68776.1_T9	KRY14720.1_T12	TP07922_T4	KRZ70933.1_T10	KRZ16891.1_T11
4160	EFV58408_T1	KRZ57134.1_T2	KRY60423.1_T3	KRX41816.1_T5	KRX83298.1_T6	KRX22721.1_T7	KRZ88033.1_T8	KRX69027.1_T9	KRY14725.1_T12	TP07919_T4	KRZ70963.1_T10	KRZ16801.1_T11
4161	EFV58410_T1	KRZ57117.1_T2	KRY60406.1_T3	KRX41798.1_T5	KRX83262.1_T6	KRX22742.1_T7	KRZ87992.1_T8	KRX68644.1_T9	KRY14707.1_T12	TP07917_T4	KRZ70942.1_T10	KRZ16914.1_T11
4162	EFV58414_T1	KRZ57135.1_T2	KRY60439.1_T3	KRX41793.1_T5	KRX83268.1_T6	KRX22769.1_T7	KRZ88032.1_T8	KRX68794.1_T9	KRY14676.1_T12	TP07916_T4	KRZ70918.1_T10	KRZ16835.1_T11
4163	EFV58415_T1	KRZ57085.1_T2	KRY60358.1_T3	KRX41806.1_T5	KRX83382.1_T6	KRX22786.1_T7	KRZ88011.1_T8	KRX68675.1_T9	KRY14688.1_T12	TP07915_T4	KRZ70909.1_T10	KRZ16778.1_T11
4164	EFV58416_T1	KRZ57098.1_T2	KRY60355.1_T3	KRX41776.1_T5	KRX83353.1_T6	KRX22793.1_T7	KRZ88006.1_T8	KRX69031.1_T9	KRY14675.1_T12	TP07914_T4	KRZ70917.1_T10	KRZ16936.1_T11
4165	EFV58417_T1	KRZ57112.1_T2	KRY60313.1_T3	KRX41794.1_T5	KRX83377.1_T6	KRX22706.1_T7	KRZ88056.1_T8	KRX68732.1_T9	KRY14697.1_T12	TP07911_T4	KRZ70965.1_T10	KRZ16806.1_T11
4166	EFV58420_T1	KRZ57121.1_T2	KRY60468.1_T3	KRX39498.1_T5	KRX83318.1_T6	KRX22765.1_T7	KRZ88031.1_T8	KRX68748.1_T9	KRY14699.1_T12	TP07910_T4	KRZ70946.1_T10	KRZ16811.1_T11
4167	EFV58423_T1	KRZ57104.1_T2	KRY60455.1_T3	KRX39506.1_T5	KRX83398.1_T6	KRX22732.1_T7	KRZ88015.1_T8	KRX68974.1_T9	KRY14714.1_T12	TP07908_T4	KRZ78617.1_T10	KRZ16904.1_T11
4168	EFV58429_T1	KRZ57102.1_T2	KRY60334.1_T3	KRX39509.1_T5	KRX83277.1_T6	KRX22768.1_T7	KRZ88051.1_T8	KRX68855.1_T9	KRY14683.1_T12	TP07902_T4	KRZ78576.1_T10	KRZ16856.1_T11
4169	EFV58430_T1	KRZ57092.1_T2	KRY60307.1_T3	KRX39494.1_T5	KRX83287.1_T6	KRX22745.1_T7	KRZ88060.1_T8	KRX68677.1_T9	KRY14685.1_T12	TP07901_T4	KRZ78722.1_T10	KRZ16845.1_T11
4170	EFV58431_T1	KRZ57125.1_T2	KRY60437.1_T3	KRX39499.1_T5	KRX83337.1_T6	KRX22703.1_T7	KRZ87997.1_T8	KRX68683.1_T9	KRY14706.1_T12	TP07899_T4	KRZ78707.1_T10	KRZ16781.1_T11
4172	EFV58438_T1	KRZ57124.1_T2	KRY60454.1_T3	KRX39517.1_T5	KRX83368.1_T6	KRX22770.1_T7	KRZ88044.1_T8	KRX68961.1_T9	KRY14710.1_T12	TP07892_T4	KRZ78627.1_T10	KRZ16897.1_T11
4173	EFV58455_T1	KRZ52468.1_T2	KRY51742.1_T3	KRX38462.1_T5	KRX70588.1_T6	KRX22696.1_T7	KRZ85751.1_T8	KRX60340.1_T9	KRY12852.1_T12	TP07887_T4	KRZ78583.1_T10	KRZ16911.1_T11
4174	EFV58474_T1	KRZ49394.1_T2	KRY60310.1_T3	KRX41778.1_T5	KRX83376.1_T6	KRX21041.1_T7	KRZ88003.1_T8	KRX68962.1_T9	KRY10183.1_T12	TP07925_T4	KRZ70949.1_T10	KRZ16803.1_T11
4175	EFV58479_T1	KRZ48905.1_T2	KRY60340.1_T3	KRX35778.1_T5	KRX83354.1_T6	KRX21016.1_T7	KRZ92075.1_T8	KRX66106.1_T9	KRY16171.1_T12	TP07946_T4	KRZ70959.1_T10	KRZ16792.1_T11
4176	EFV58482_T1	KRZ48900.1_T2	KRY60441.1_T3	KRX35779.1_T5	KRX83263.1_T6	KRX21032.1_T7	KRZ92080.1_T8	KRX66018.1_T9	KRY16190.1_T12	TP07938_T4	KRZ70926.1_T10	KRZ16842.1_T11
4177	EFV58483_T1	KRZ48903.1_T2	KRY60352.1_T3	KRX35774.1_T5	KRX83340.1_T6	KRX21037.1_T7	KRZ92162.1_T8	KRX65950.1_T9	KRY16196.1_T12	TP07936_T4	KRZ70944.1_T10	KRZ16916.1_T11
4178	EFV58487_T1	KRZ60116.1_T2	KRY56090.1_T3	KRX42608.1_T5	KRX78134.1_T6	KRX26615.1_T7	KRZ91877.1_T8	KRX55812.1_T9	KRY07983.1_T12	TP08077_T4	KRZ80421.1_T10	KRZ18070.1_T11
4179	EFV58492_T1	KRZ52565.1_T2	KRY47640.1_T3	KRX42587.1_T5	KRX80360.1_T6	KRX21885.1_T7	KRZ91938.1_T8	KRX55818.1_T9	KRY11221.1_T12	TP08070_T4	KRZ68144.1_T10	KRZ18043.1_T11
4180	EFV58496_T1	KRZ52578.1_T2	KRY47631.1_T3	KRX42576.1_T5	KRX80397.1_T6	KRX21872.1_T7	KRZ91895.1_T8	KRX55820.1_T9	KRY11220.1_T12	TP08065_T4	KRZ68159.1_T10	KRZ17972.1_T11
4181	EFV58501_T1	KRZ52561.1_T2	KRY47639.1_T3	KRX42589.1_T5	KRX80382.1_T6	KRX21865.1_T7	KRZ91881.1_T8	KRX55822.1_T9	KRY11211.1_T12	TP08055_T4	KRZ68153.1_T10	KRZ18172.1_T11
4182	EFV58505_T1	KRZ48775.1_T2	KRY49053.1_T3	KRX35404.1_T5	KRX80395.1_T6	KRX21873.1_T7	KRZ91943.1_T8	KRX66050.1_T9	KRY20149.1_T12	TP08050_T4	KRZ68147.1_T10	KRZ18123.1_T11
4183	EFV58508_T1	KRZ49103.1_T2	KRY49047.1_T3	KRX35987.1_T5	KRX80380.1_T6	KRX21825.1_T7	KRZ91961.1_T8	KRX65960.1_T9	KRY20109.1_T12	TP08046_T4	KRZ74731.1_T10	KRZ05439.1_T11
4184	EFV58511_T1	KRZ49104.1_T2	KRY49048.1_T3	KRX35986.1_T5	KRX80361.1_T6	KRX21804.1_T7	KRZ91952.1_T8	KRX66055.1_T9	KRY20093.1_T12	TP08043_T4	KRZ74714.1_T10	KRZ05455.1_T11
4185	EFV58515_T1	KRZ51659.1_T2	KRY49040.1_T3	KRX38080.1_T5	KRX80346.1_T6	KRX21884.1_T7	KRZ91929.1_T8	KRX66028.1_T9	KRY20141.1_T12	TP08039_T4	KRZ74708.1_T10	KRZ05438.1_T11
4186	EFV58516_T1	KRZ51657.1_T2	KRY49042.1_T3	KRX38074.1_T5	KRX80336.1_T6	KRX21848.1_T7	KRZ91874.1_T8	KRX66113.1_T9	KRY20072.1_T12	TP08038_T4	KRZ74721.1_T10	KRZ05450.1_T11
4187	EFV58519_T1	KRZ51658.1_T2	KRY49050.1_T3	KRX38076.1_T5	KRX80378.1_T6	KRX21838.1_T7	KRZ91960.1_T8	KRX66072.1_T9	KRY20139.1_T12	TP08035_T4	KRZ74733.1_T10	KRZ05461.1_T11
4188	EFV58524_T1	KRZ52166.1_T2	KRY49985.1_T3	KRX39803.1_T5	KRX80388.1_T6	KRX21829.1_T7	KRZ91886.1_T8	KRX66101.1_T9	KRY20133.1_T12	TP08030_T4	KRZ79208.1_T10	KRZ05464.1_T11
4189	EFV58525_T1	KRZ52188.1_T2	KRY49991.1_T3	KRX39779.1_T5	KRX80331.1_T6	KRX21840.1_T7	KRZ91951.1_T8	KRX65993.1_T9	KRY20136.1_T12	TP08029_T4	KRZ79289.1_T10	KRZ05459.1_T11
4190	EFV58535_T1	KRZ52186.1_T2	KRY49989.1_T3	KRX46819.1_T5	KRX71419.1_T6	KRX21916.1_T7	KRZ91918.1_T8	KRX65977.1_T9	KRY20140.1_T12	TP08019_T4	KRZ79425.1_T10	KRZ08331.1_T11
4191	EFV58536_T1	KRZ52177.1_T2	KRY49990.1_T3	KRX46812.1_T5	KRX71424.1_T6	KRX21803.1_T7	KRZ91946.1_T8	KRX65981.1_T9	KRY20110.1_T12	TP08015_T4	KRZ79342.1_T10	KRZ08373.1_T11
4192	EFV58537_T1	KRZ52174.1_T2	KRY49981.1_T3	KRX46859.1_T5	KRX71433.1_T6	KRX21819.1_T7	KRZ91923.1_T8	KRX66069.1_T9	KRY20121.1_T12	TP08014_T4	KRZ79319.1_T10	KRZ08348.1_T11
4193	EFV58538_T1	KRZ52172.1_T2	KRY50001.1_T3	KRX46801.1_T5	KRX71420.1_T6	KRX21898.1_T7	KRZ91888.1_T8	KRX66103.1_T9	KRY20102.1_T12	TP08013_T4	KRZ79285.1_T10	KRZ08358.1_T11
4194	EFV58542_T1	KRZ52189.1_T2	KRY49995.1_T3	KRX46858.1_T5	KRX71426.1_T6	KRX21850.1_T7	KRZ91917.1_T8	KRX66096.1_T9	KRY20119.1_T12	TP08010_T4	KRZ79392.1_T10	KRZ08326.1_T11
4195	EFV58546_T1	KRZ56466.1_T2	KRY56206.1_T3	KRX46863.1_T5	KRX76867.1_T6	KRX20989.1_T7	KRZ92163.1_T8	KRX65987.1_T9	KRY20112.1_T12	TP08005_T4	KRZ79407.1_T10	KRZ08330.1_T11
4196	EFV58547_T1	KRZ56467.1_T2	KRY56182.1_T3	KRX46833.1_T5	KRX76858.1_T6	KRX21018.1_T7	KRZ92127.1_T8	KRX66076.1_T9	KRY20097.1_T12	TP08004_T4	KRZ79364.1_T10	KRZ08341.1_T11
4197	EFV58548_T1	KRZ56476.1_T2	KRY56173.1_T3	KRX46823.1_T5	KRX76892.1_T6	KRX20996.1_T7	KRZ92088.1_T8	KRX66092.1_T9	KRY20096.1_T12	TP08003_T4	KRZ79423.1_T10	KRZ08362.1_T11
4198	EFV58549_T1	KRZ56480.1_T2	KRY56193.1_T3	KRX46848.1_T5	KRX76865.1_T6	KRX21055.1_T7	KRZ92070.1_T8	KRX65971.1_T9	KRY20087.1_T12	TP08002_T4	KRZ79400.1_T10	KRZ08334.1_T11
4199	EFV58551_T1	KRZ56452.1_T2	KRY56146.1_T3	KRX46853.1_T5	KRX76881.1_T6	KRX20972.1_T7	KRZ92072.1_T8	KRX66043.1_T9	KRY20071.1_T12	TP08000_T4	KRZ79369.1_T10	KRZ08378.1_T11
4200	EFV58555_T1	KRZ56459.1_T2	KRY56160.1_T3	KRX46857.1_T5	KRX76879.1_T6	KRX20988.1_T7	KRZ92141.1_T8	KRX66030.1_T9	KRY20132.1_T12	TP07996_T4	KRZ79297.1_T10	KRZ08377.1_T11
4201	EFV58561_T1	KRZ56485.1_T2	KRY56195.1_T3	KRX46807.1_T5	KRX76909.1_T6	KRX21058.1_T7	KRZ92085.1_T8	KRX66045.1_T9	KRY20130.1_T12	TP07985_T4	KRZ79252.1_T10	KRZ08352.1_T11
4202	EFV58571_T1	KRZ56488.1_T2	KRY56140.1_T3	KRX46800.1_T5	KRX76874.1_T6	KRX20959.1_T7	KRZ92112.1_T8	KRX65963.1_T9	KRY14817.1_T12	TP07976_T4	KRZ79292.1_T10	KRZ08368.1_T11
4203	EFV58573_T1	KRZ56493.1_T2	KRY56148.1_T3	KRX46821.1_T5	KRX76901.1_T6	KRX20974.1_T7	KRZ92139.1_T8	KRX66127.1_T9	KRY14828.1_T12	TP07978_T4	KRZ79366.1_T10	KRZ08359.1_T11
4204	EFV58575_T1	KRZ56490.1_T2	KRY56198.1_T3	KRX46852.1_T5	KRX76887.1_T6	KRX21039.1_T7	KRZ92078.1_T8	KRX65954.1_T9	KRY14804.1_T12	TP07975_T4	KRZ79331.1_T10	KRZ08333.1_T11
4205	EFV58576_T1	KRZ56458.1_T2	KRY56129.1_T3	KRX46856.1_T5	KRX76863.1_T6	KRX21057.1_T7	KRZ92123.1_T8	KRX66031.1_T9	KRY14794.1_T12	TP07974_T4	KRZ79376.1_T10	KRZ08343.1_T11
4206	EFV58577_T1	KRZ56462.1_T2	KRY56163.1_T3	KRX46808.1_T5	KRX76906.1_T6	KRX20968.1_T7	KRZ92113.1_T8	KRX66054.1_T9	KRY14807.1_T12	TP07973_T4	KRZ79242.1_T10	KRZ08335.1_T11
4207	EFV58586_T1	KRZ56615.1_T2	KRY56138.1_T3	KRX37818.1_T5	KRX83361.1_T6	KRX21002.1_T7	KRZ92153.1_T8	KRX65968.1_T9	KRY14833.1_T12	TP07968_T4	KRZ74713.1_T10	KRZ16899.1_T11
4209	EFV58591_T1	KRZ56626.1_T2	KRY56178.1_T3	KRX37820.1_T5	KRX83347.1_T6	KRX20971.1_T7	KRZ92169.1_T8	KRX65947.1_T9	KRY14812.1_T12	TP07964_T4	KRZ74761.1_T10	KRZ16816.1_T11
4210	EFV58596_T1	KRZ56612.1_T2	KRY56213.1_T3	KRX37815.1_T5	KRX83378.1_T6	KRX20952.1_T7	KRZ92160.1_T8	KRX66042.1_T9	KRY14824.1_T12	TP07958_T4	KRZ74701.1_T10	KRZ16764.1_T11
4211	EFV58598_T1	KRZ56641.1_T2	KRY56149.1_T3	KRX37813.1_T5	KRX83349.1_T6	KRX20950.1_T7	KRZ92167.1_T8	KRX65964.1_T9	KRY14813.1_T12	TP07955_T4	KRZ74722.1_T10	KRZ16814.1_T11
4212	EFV58601_T1	KRZ56629.1_T2	KRY56151.1_T3	KRX34331.1_T5	KRX83314.1_T6	KRX20963.1_T7	KRZ92104.1_T8	KRX65978.1_T9	KRY14821.1_T12	TP07952_T4	KRZ74704.1_T10	KRZ16949.1_T11
4213	EFV58604_T1	KRZ56628.1_T2	KRY56185.1_T3	KRX36133.1_T5	KRX83360.1_T6	KRX21042.1_T7	KRZ92161.1_T8	KRX65976.1_T9	KRY14814.1_T12	TP07950_T4	KRZ70950.1_T10	KRZ16948.1_T11
4214	EFV58605_T1	KRZ56654.1_T2	KRY56159.1_T3	KRX36141.1_T5	KRX83333.1_T6	KRX21031.1_T7	KRZ92176.1_T8	KRX66034.1_T9	KRY14827.1_T12	TP07949_T4	KRZ70912.1_T10	KRZ16935.1_T11
4215	EFV58606_T1	KRZ56613.1_T2	KRY56184.1_T3	KRX36137.1_T5	KRX83336.1_T6	KRX21035.1_T7	KRZ92111.1_T8	KRX66125.1_T9	KRY14815.1_T12	TP07948_T4	KRZ70927.1_T10	KRZ16938.1_T11
4217	EFV58618_T1	KRZ50680.1_T2	KRY58588.1_T3	KRX38902.1_T5	KRX76783.1_T6	KRX14802.1_T7	KRZ92555.1_T8	KRX67017.1_T9	KRY18209.1_T12	TP09235_T4	KRZ70619.1_T10	KRZ18002.1_T11
4218	EFV58619_T1	KRZ50682.1_T2	KRY58522.1_T3	KRX38905.1_T5	KRX76780.1_T6	KRX14770.1_T7	KRZ92526.1_T8	KRX67023.1_T9	KRY18239.1_T12	TP09236_T4	KRZ70571.1_T10	KRZ18099.1_T11
4219	EFV58621_T1	KRZ50666.1_T2	KRY58589.1_T3	KRX38899.1_T5	KRX76781.1_T6	KRX14784.1_T7	KRZ92547.1_T8	KRX67123.1_T9	KRY18237.1_T12	TP09238_T4	KRZ70574.1_T10	KRZ17984.1_T11
4220	EFV58623_T1	KRZ50676.1_T2	KRY58568.1_T3	KRX38907.1_T5	KRX76792.1_T6	KRX14768.1_T7	KRZ92556.1_T8	KRX67104.1_T9	KRY18249.1_T12	TP09240_T4	KRZ70617.1_T10	KRZ18168.1_T11
4221	EFV58628_T1	KRZ50681.1_T2	KRY58541.1_T3	KRX38919.1_T5	KRX76746.1_T6	KRX14785.1_T7	KRZ92604.1_T8	KRX67081.1_T9	KRY18259.1_T12	TP09245_T4	KRZ70591.1_T10	KRZ18004.1_T11
4222	EFV58637_T1	KRZ58463.1_T2	KRY56221.1_T3	KRX37959.1_T5	KRX71656.1_T6	KRX26664.1_T7	KRZ83879.1_T8	KRX67041.1_T9	KRY22965.1_T12	TP08121_T4	KRZ80605.1_T10	KRZ18058.1_T11
4223	EFV58638_T1	KRZ58459.1_T2	KRY56282.1_T3	KRX37958.1_T5	KRX71629.1_T6	KRX26678.1_T7	KRZ83866.1_T8	KRX67059.1_T9	KRY22994.1_T12	TP08107_T4	KRZ80430.1_T10	KRZ18074.1_T11
4224	EFV58641_T1	KRZ58412.1_T2	KRY56240.1_T3	KRX37955.1_T5	KRX71642.1_T6	KRX26719.1_T7	KRZ83863.1_T8	KRX67014.1_T9	KRY22835.1_T12	TP08104_T4	KRZ80436.1_T10	KRZ18175.1_T11
4225	EFV58645_T1	KRZ58422.1_T2	KRY56275.1_T3	KRX37947.1_T5	KRX71639.1_T6	KRX26809.1_T7	KRZ83872.1_T8	KRX67048.1_T9	KRY22882.1_T12	TP08100_T4	KRZ80386.1_T10	KRZ18040.1_T11
4226	EFV58646_T1	KRZ58432.1_T2	KRY56234.1_T3	KRX37952.1_T5	KRX71637.1_T6	KRX26620.1_T7	KRZ83862.1_T8	KRX67070.1_T9	KRY22939.1_T12	TP08099_T4	KRZ80495.1_T10	KRZ18196.1_T11
4227	EFV58661_T1	KRZ51736.1_T2	KRY58558.1_T3	KRX47512.1_T5	KRX73486.1_T6	KRX24940.1_T7	KRZ92570.1_T8	KRX67091.1_T9	KRY18278.1_T12	TP09205_T4	KRZ70475.1_T10	KRZ18128.1_T11
4228	EFV58662_T1	KRZ51734.1_T2	KRY58547.1_T3	KRX47510.1_T5	KRX73518.1_T6	KRX25025.1_T7	KRZ92501.1_T8	KRX67115.1_T9	KRY18235.1_T12	TP09206_T4	KRZ70491.1_T10	KRZ17983.1_T11
4229	EFV58666_T1	KRZ51714.1_T2	KRY58531.1_T3	KRX47488.1_T5	KRX73515.1_T6	KRX24943.1_T7	KRZ92597.1_T8	KRX67127.1_T9	KRY18274.1_T12	TP09211_T4	KRZ70520.1_T10	KRZ18009.1_T11
4230	EFV58667_T1	KRZ51741.1_T2	KRY58586.1_T3	KRX47504.1_T5	KRX73500.1_T6	KRX24938.1_T7	KRZ92582.1_T8	KRX67114.1_T9	KRY18253.1_T12	TP00205_T4	KRZ80844.1_T10	KRZ12031.1_T11
4231	EFV58669_T1	KRZ51716.1_T2	KRY58562.1_T3	KRX47457.1_T5	KRX73520.1_T6	KRX25064.1_T7	KRZ92532.1_T8	KRX67021.1_T9	KRY18211.1_T12	TP09215_T4	KRZ70513.1_T10	KRZ17991.1_T11
4232	EFV58670_T1	KRZ51718.1_T2	KRY58595.1_T3	KRX47475.1_T5	KRX73512.1_T6	KRX25015.1_T7	KRZ92520.1_T8	KRX67108.1_T9	KRY18212.1_T12	TP09216_T4	KRZ70465.1_T10	KRZ18039.1_T11
4233	EFV58671_T1	KRZ51726.1_T2	KRY58515.1_T3	KRX47495.1_T5	KRX73498.1_T6	KRX24965.1_T7	KRZ92587.1_T8	KRX67064.1_T9	KRY18233.1_T12	TP09217_T4	KRZ70512.1_T10	KRZ17973.1_T11
4234	EFV58673_T1	KRZ51725.1_T2	KRY58533.1_T3	KRX47505.1_T5	KRX73496.1_T6	KRX25023.1_T7	KRZ92572.1_T8	KRX67138.1_T9	KRY18252.1_T12	TP09219_T4	KRZ70490.1_T10	KRZ18200.1_T11
4235	EFV58678_T1	KRZ51638.1_T2	KRY58590.1_T3	KRX47468.1_T5	KRX76793.1_T6	KRX24947.1_T7	KRZ92487.1_T8	KRX67016.1_T9	KRY18251.1_T12	TP09223_T4	KRZ70479.1_T10	KRZ18005.1_T11
4236	EFV58681_T1	KRZ51625.1_T2	KRY58553.1_T3	KRX47476.1_T5	KRX76795.1_T6	KRX25054.1_T7	KRZ92543.1_T8	KRX67122.1_T9	KRY18213.1_T12	TP09225_T4	KRZ70464.1_T10	KRZ18007.1_T11
4238	EFV58688_T1	KRZ50667.1_T2	KRY58575.1_T3	KRX38916.1_T5	KRX76778.1_T6	KRX25011.1_T7	KRZ92514.1_T8	KRX67044.1_T9	KRY18222.1_T12	TP09231_T4	KRZ74727.1_T10	KRZ18169.1_T11
4239	EFV58693_T1	KRZ50908.1_T2	KRY56772.1_T3	KRX34423.1_T5	KRX75152.1_T6	KRX25084.1_T7	KRZ96777.1_T8	KRX55150.1_T9	KRY10421.1_T12	TP09174_T4	KRZ76916.1_T10	KRZ18032.1_T11
4240	EFV58703_T1	KRZ60135.1_T2	KRY56789.1_T3	KRX47020.1_T5	KRX77081.1_T6	KRX25057.1_T7	KRZ92515.1_T8	KRX67623.1_T9	KRY15805.1_T12	TP09178_T4	KRZ74039.1_T10	KRZ18042.1_T11
4242	EFV58707_T1	KRZ60186.1_T2	KRY56819.1_T3	KRX47011.1_T5	KRX77082.1_T6	KRX24933.1_T7	KRZ92525.1_T8	KRX67756.1_T9	KRY15788.1_T12	TP09184_T4	KRZ71856.1_T10	KRZ18026.1_T11
4243	EFV58708_T1	KRZ60127.1_T2	KRY56735.1_T3	KRX47021.1_T5	KRX77079.1_T6	KRX24932.1_T7	KRZ92551.1_T8	KRX67750.1_T9	KRY15828.1_T12	TP09185_T4	KRZ71893.1_T10	KRZ18112.1_T11
4244	EFV58711_T1	KRZ60162.1_T2	KRY56802.1_T3	KRX47014.1_T5	KRX77061.1_T6	KRX25108.1_T7	KRZ92506.1_T8	KRX67848.1_T9	KRY15791.1_T12	TP09187_T4	KRZ71852.1_T10	KRZ18100.1_T11
4245	EFV58713_T1	KRZ60199.1_T2	KRY56777.1_T3	KRX46954.1_T5	KRX77084.1_T6	KRX25020.1_T7	KRZ92577.1_T8	KRX67844.1_T9	KRY15784.1_T12	TP09189_T4	KRZ71903.1_T10	KRZ18203.1_T11
4246	EFV58716_T1	KRZ60123.1_T2	KRY56748.1_T3	KRX46951.1_T5	KRX77053.1_T6	KRX25000.1_T7	KRZ92494.1_T8	KRX67779.1_T9	KRY09496.1_T12	TP09193_T4	KRZ71858.1_T10	KRZ17979.1_T11
4247	EFV58718_T1	KRZ60126.1_T2	KRY47423.1_T3	KRX46965.1_T5	KRX70317.1_T6	KRX24954.1_T7	KRZ92573.1_T8	KRX64665.1_T9	KRY09488.1_T12	TP09195_T4	KRZ71869.1_T10	KRZ18164.1_T11
4248	EFV58720_T1	KRZ60132.1_T2	KRY47441.1_T3	KRX47018.1_T5	KRX70322.1_T6	KRX25026.1_T7	KRZ92586.1_T8	KRX64680.1_T9	KRY09503.1_T12	TP09197_T4	KRZ71897.1_T10	KRZ18193.1_T11
4249	EFV58722_T1	KRZ51733.1_T2	KRY58527.1_T3	KRX47478.1_T5	KRX73508.1_T6	KRX24970.1_T7	KRZ92519.1_T8	KRX62343.1_T9	KRY18275.1_T12	TP09199_T4	KRZ70500.1_T10	KRZ18133.1_T11
4250	EFV58724_T1	KRZ51722.1_T2	KRY58551.1_T3	KRX47501.1_T5	KRX73491.1_T6	KRX25123.1_T7	KRZ92610.1_T8	KRX62327.1_T9	KRY18219.1_T12	TP09200_T4	KRZ70462.1_T10	KRZ18030.1_T11
4251	EFV58732_T1	KRZ50888.1_T2	KRY56729.1_T3	KRX42118.1_T5	KRX75161.1_T6	KRX25112.1_T7	KRZ96801.1_T8	KRX55165.1_T9	KRY23957.1_T12	TP09153_T4	KRZ76898.1_T10	KRZ18151.1_T11
4252	EFV58733_T1	KRZ50903.1_T2	KRY56734.1_T3	KRX42120.1_T5	KRX75178.1_T6	KRX25005.1_T7	KRZ96679.1_T8	KRX55144.1_T9	KRY23962.1_T12	TP09154_T4	KRZ76937.1_T10	KRZ18095.1_T11
4253	EFV58736_T1	KRZ50900.1_T2	KRY56766.1_T3	KRX42128.1_T5	KRX75176.1_T6	KRX25067.1_T7	KRZ96829.1_T8	KRX55138.1_T9	KRY10435.1_T12	TP09164_T4	KRZ76876.1_T10	KRZ18083.1_T11
4254	EFV58737_T1	KRZ50892.1_T2	KRY56817.1_T3	KRX34361.1_T5	KRX75159.1_T6	KRX25075.1_T7	KRZ96872.1_T8	KRX55157.1_T9	KRY10409.1_T12	TP09167_T4	KRZ76901.1_T10	KRZ18098.1_T11
4255	EFV58738_T1	KRZ50904.1_T2	KRY56825.1_T3	KRX34363.1_T5	KRX75155.1_T6	KRX25021.1_T7	KRZ96798.1_T8	KRX55141.1_T9	KRY10420.1_T12	TP09168_T4	KRZ76910.1_T10	KRZ18106.1_T11
4256	EFV58739_T1	KRZ50897.1_T2	KRY56774.1_T3	KRX34360.1_T5	KRX75175.1_T6	KRX24978.1_T7	KRZ96713.1_T8	KRX55160.1_T9	KRY10415.1_T12	TP09169_T4	KRZ76913.1_T10	KRZ17998.1_T11
4257	EFV58740_T1	KRZ50895.1_T2	KRY56730.1_T3	KRX34364.1_T5	KRX75164.1_T6	KRX24934.1_T7	KRZ96825.1_T8	KRX55147.1_T9	KRY10426.1_T12	TP09170_T4	KRZ76947.1_T10	KRZ18125.1_T11
4258	EFV58746_T1	KRZ59384.1_T2	KRY56412.1_T3	KRX51124.1_T5	KRX76923.1_T6	KRX19601.1_T7	KRZ94783.1_T8	KRX62192.1_T9	KRY08367.1_T12	TP09049_T4	KRZ79287.1_T10	KRZ14211.1_T11
4259	EFV58748_T1	KRZ59396.1_T2	KRY56424.1_T3	KRX51178.1_T5	KRX76948.1_T6	KRX19587.1_T7	KRZ94836.1_T8	KRX62228.1_T9	KRY13494.1_T12	TP09047_T4	KRZ79413.1_T10	KRZ14229.1_T11
4260	EFV58749_T1	KRZ59400.1_T2	KRY56427.1_T3	KRX51133.1_T5	KRX76943.1_T6	KRX19645.1_T7	KRZ94759.1_T8	KRX62207.1_T9	KRY13470.1_T12	TP09045_T4	KRZ79198.1_T10	KRZ14302.1_T11
4261	EFV58750_T1	KRZ59417.1_T2	KRY56386.1_T3	KRX51129.1_T5	KRX76970.1_T6	KRX19625.1_T7	KRZ94728.1_T8	KRX62296.1_T9	KRY13464.1_T12	TP09044_T4	KRZ79309.1_T10	KRZ14283.1_T11
4262	EFV58751_T1	KRZ59449.1_T2	KRY56390.1_T3	KRX51089.1_T5	KRX76964.1_T6	KRX19639.1_T7	KRZ94725.1_T8	KRX62197.1_T9	KRY13480.1_T12	TP09043_T4	KRZ79199.1_T10	KRZ14243.1_T11
4263	EFV58752_T1	KRZ59448.1_T2	KRY56405.1_T3	KRX51058.1_T5	KRX76962.1_T6	KRX19585.1_T7	KRZ94803.1_T8	KRX62229.1_T9	KRY13482.1_T12	TP09041_T4	KRZ79280.1_T10	KRZ14193.1_T11
4264	EFV58754_T1	KRZ59390.1_T2	KRY56431.1_T3	KRX51204.1_T5	KRX76917.1_T6	KRX19574.1_T7	KRZ94780.1_T8	KRX62261.1_T9	KRY13491.1_T12	TP09039_T4	KRZ79402.1_T10	KRZ14226.1_T11
4265	EFV58758_T1	KRZ59403.1_T2	KRY56408.1_T3	KRX51057.1_T5	KRX72419.1_T6	KRX19650.1_T7	KRZ94723.1_T8	KRX62194.1_T9	KRY13460.1_T12	TP09034_T4	KRZ79218.1_T10	KRZ14215.1_T11
4266	EFV58759_T1	KRZ59423.1_T2	KRY56458.1_T3	KRX51041.1_T5	KRX72440.1_T6	KRX19628.1_T7	KRZ94764.1_T8	KRX62236.1_T9	KRY13469.1_T12	TP09033_T4	KRZ79225.1_T10	KRZ14290.1_T11
4267	EFV58760_T1	KRZ59404.1_T2	KRY56449.1_T3	KRX51187.1_T5	KRX72425.1_T6	KRX19552.1_T7	KRZ94754.1_T8	KRX62293.1_T9	KRY13473.1_T12	TP09032_T4	KRZ79397.1_T10	KRZ14272.1_T11
4268	EFV58761_T1	KRZ59428.1_T2	KRY56415.1_T3	KRX51157.1_T5	KRX72436.1_T6	KRX19629.1_T7	KRZ94839.1_T8	KRX62235.1_T9	KRY13496.1_T12	TP09031_T4	KRZ79346.1_T10	KRZ14279.1_T11
4269	EFV58769_T1	KRZ59431.1_T2	KRY56433.1_T3	KRX51135.1_T5	KRX72442.1_T6	KRX19642.1_T7	KRZ94750.1_T8	KRX62273.1_T9	KRY13477.1_T12	TP09022_T4	KRZ79244.1_T10	KRZ14214.1_T11
4270	EFV58772_T1	KRZ59413.1_T2	KRY56396.1_T3	KRX51068.1_T5	KRX72429.1_T6	KRX19559.1_T7	KRZ94745.1_T8	KRX62286.1_T9	KRY13481.1_T12	TP09021_T4	KRZ79314.1_T10	KRZ14247.1_T11
4271	EFV58778_T1	KRZ59382.1_T2	KRY56452.1_T3	KRX51208.1_T5	KRX72423.1_T6	KRX19593.1_T7	KRZ94722.1_T8	KRX62203.1_T9	KRY13475.1_T12	TP07827_T4	KRZ75028.1_T10	KRZ06502.1_T11
4272	EFV58793_T1	KRZ52457.1_T2	KRY59128.1_T3	KRX51109.1_T5	KRX76936.1_T6	KRX24437.1_T7	KRZ94874.1_T8	KRX62303.1_T9	KRY20990.1_T12	TP09088_T4	KRZ79416.1_T10	KRZ15844.1_T11
4273	EFV58805_T1	KRZ52440.1_T2	KRY59119.1_T3	KRX51056.1_T5	KRX76932.1_T6	KRX24482.1_T7	KRZ94786.1_T8	KRX62271.1_T9	KRY21000.1_T12	TP09061_T4	KRZ79362.1_T10	KRZ14217.1_T11
4274	EFV58806_T1	KRZ52455.1_T2	KRY59171.1_T3	KRX51176.1_T5	KRX76947.1_T6	KRX24476.1_T7	KRZ94743.1_T8	KRX62186.1_T9	KRY21037.1_T12	TP09060_T4	KRZ79295.1_T10	KRZ14210.1_T11
4275	EFV58807_T1	KRZ52437.1_T2	KRY56385.1_T3	KRX51044.1_T5	KRX76950.1_T6	KRX24423.1_T7	KRZ94838.1_T8	KRX62246.1_T9	KRY21042.1_T12	TP09057_T4	KRZ79418.1_T10	KRZ14234.1_T11
4276	EFV58808_T1	KRZ52432.1_T2	KRY56389.1_T3	KRX51209.1_T5	KRX76974.1_T6	KRX24418.1_T7	KRZ94812.1_T8	KRX62270.1_T9	KRY20941.1_T12	TP09055_T4	KRZ79414.1_T10	KRZ14188.1_T11
4277	EFV58809_T1	KRZ52424.1_T2	KRY56429.1_T3	KRX51144.1_T5	KRX76925.1_T6	KRX24435.1_T7	KRZ94828.1_T8	KRX62244.1_T9	KRY20950.1_T12	TP09054_T4	KRZ79327.1_T10	KRZ14204.1_T11
4279	EFV58812_T1	KRZ52441.1_T2	KRY56404.1_T3	KRX51125.1_T5	KRX76920.1_T6	KRX19608.1_T7	KRZ94808.1_T8	KRX62266.1_T9	KRY21028.1_T12	TP09053_T4	KRZ79385.1_T10	KRZ14246.1_T11
4280	EFV58819_T1	KRZ48952.1_T2	KRY59089.1_T3	KRX51118.1_T5	KRX72601.1_T6	KRX24422.1_T7	KRZ94751.1_T8	KRX67789.1_T9	KRY20953.1_T12	TP09124_T4	KRZ76932.1_T10	KRZ15799.1_T11
4281	EFV58832_T1	KRZ59634.1_T2	KRY59153.1_T3	KRX51200.1_T5	KRX72102.1_T6	KRX24457.1_T7	KRZ94853.1_T8	KRX67813.1_T9	KRY21026.1_T12	TP09113_T4	KRZ76948.1_T10	KRZ15836.1_T11
4282	EFV58833_T1	KRZ59661.1_T2	KRY59166.1_T3	KRX51217.1_T5	KRX72117.1_T6	KRX24428.1_T7	KRZ94731.1_T8	KRX67731.1_T9	KRY20978.1_T12	TP09112_T4	KRZ76885.1_T10	KRZ15801.1_T11
4283	EFV58836_T1	KRZ59635.1_T2	KRY59091.1_T3	KRX51115.1_T5	KRX72109.1_T6	KRX24480.1_T7	KRZ94752.1_T8	KRX67830.1_T9	KRY20947.1_T12	TP09109_T4	KRZ76906.1_T10	KRZ15790.1_T11
4284	EFV58852_T1	KRZ59657.1_T2	KRY59084.1_T3	KRX51195.1_T5	KRX80037.1_T6	KRX24574.1_T7	KRZ94807.1_T8	KRX67796.1_T9	KRY21021.1_T12	TP09101_T4	KRZ76915.1_T10	KRZ15835.1_T11
4285	EFV58855_T1	KRZ59632.1_T2	KRY59069.1_T3	KRX51152.1_T5	KRX79994.1_T6	KRX24525.1_T7	KRZ94832.1_T8	KRX67686.1_T9	KRY21009.1_T12	TP09099_T4	KRZ76900.1_T10	KRZ15797.1_T11
4286	EFV58857_T1	KRZ59628.1_T2	KRY59143.1_T3	KRX51103.1_T5	KRX80010.1_T6	KRX24553.1_T7	KRZ94778.1_T8	KRX67612.1_T9	KRY20939.1_T12	TP09098_T4	KRZ76890.1_T10	KRZ15841.1_T11
[truncated: 711 more rows]
